# Supplementary material for: Integrative Transcriptomic and Metabolomics Reveal Dynamic Differences in Pathogen Resistance Between Resistant and Susceptible Cultivars of Myrica rubra
Source: Research Square preprint supplement (doi:10.21203/rs.3.rs-7090173/v1), 2025-07-22
Supplement: Supplementary file 1 [file d80dc39a93c7cf26e9accaf9.xlsx]

## Sheet: Supplementary table S1  DGEs
Supplementary table S1: All the detected differentially expressed genes (DGEs) in response to TB
1. Dingao samples
Gene ID	DA P.m 1DPI vs DA CK 1DPI	DA P.m 5DPI vs DA CK 5DPI
6782	1111	324
GENE_017870	no|up	no|down
GENE_024658	yes|up	no|up
GENE_020544	no|up	no|down
GENE_015591	no|down	no|up
GENE_024381	no|down	no|down
GENE_010940	no|down	no|down
GENE_012241	no|up	no|up
GENE_002195	no|down	no|down
GENE_021230	no|up	no|up
GENE_004648	no|down	no|up
GENE_016369	no|down	no|up
GENE_022848	no|up	no|down
GENE_018571	yes|down	no|down
GENE_024257	yes|up	no|up
GENE_021838	yes|down	no|up
GENE_022574	no|up	no|up
GENE_010285	no|down	no|down
GENE_022481	no|down	no|down
GENE_020280	no|up	no|up
GENE_015673	no|down	no|down
GENE_005836	no|up	no|down
GENE_002506	no|down	no|down
GENE_021223	no|up	no|down
GENE_001063	no|up	no|up
GENE_001069	no|down	no|up
GENE_014489	no|up	no|down
GENE_016807	no|down	no|down
GENE_013544	no|up	no|up
GENE_006468	no|down	no|down
GENE_001531	no|down	no|up
GENE_003644	yes|down	no|down
GENE_025252	no|down	no|down
GENE_003645	no|down	no|up
GENE_005869	no|up	no|down
GENE_021014	no|up	no|up
GENE_003641	no|down	no|down
GENE_015267	no|down	no|up
GENE_002958	no|up	no|down
GENE_012062	yes|down	no|up
GENE_003647	no|up	no|down
GENE_017251	no|down	no|down
GENE_025707	no|down	no|down
GENE_022760	no|up	no|down
GENE_009643	no|down	no|up
GENE_015660	no|up	no|up
GENE_002511	no|down	no|down
GENE_008111	no|down	no|up
GENE_005171	no|down	no|down
GENE_005614	no|down	yes|down
GENE_000619	no|down	no|down
GENE_016587	no|up	no|down
GENE_018619	no|up	no|up
GENE_021835	no|up	no|down
GENE_021832	no|down	no|down
GENE_000030	no|up	no|down
GENE_011770	yes|down	no|down
GENE_015056	yes|up	no|up
GENE_004348	no|down	no|up
GENE_020613	no|up	no|down
GENE_022284	no|up	no|up
GENE_024620	yes|down	no|down
GENE_008272	no|down	no|down
GENE_010972	no|up	no|down
GENE_022487	no|up	no|down
GENE_003587	no|down	no|no test
GENE_015597	no|up	no|down
GENE_006472	no|down	no|up
GENE_009325	yes|down	no|up
GENE_025930	no|down	no|down
GENE_025937	no|up	no|down
GENE_023410	no|down	no|up
GENE_009086	no|up	no|up
GENE_000003	no|up	no|down
GENE_017649	no|down	yes|down
GENE_014339	no|down	no|down
GENE_004647	no|up	no|up
GENE_021238	no|down	no|down
GENE_002771	no|down	no|down
GENE_000926	no|down	no|down
GENE_009899	yes|up	no|down
GENE_015274	yes|down	no|up
GENE_025717	no|down	no|down
GENE_025718	no|down	no|up
GENE_008276	no|down	no|down
GENE_008270	no|up	no|down
GENE_008100	no|down	no|down
GENE_002760	no|up	no|down
GENE_016379	no|down	no|up
GENE_025624	no|down	yes|up
GENE_018547	no|down	no|up
GENE_007905	no|down	no|up
GENE_003355	no|up	no|down
GENE_013532	no|down	no|down
GENE_015709	yes|up	no|down
GENE_000959	no|down	no|down
GENE_000559	no|down	no|down
GENE_009081	no|up	no|down
GENE_000007	no|down	no|down
GENE_004013	no|down	no|up
GENE_021239	yes|down	no|down
GENE_014042	yes|up	no|up
GENE_025383	no|down	no|up
GENE_023704	no|up	no|down
GENE_002140	no|down	no|up
GENE_025259	yes|down	no|up
GENE_012067	no|down	no|up
GENE_008113	no|down	no|down
GENE_003257	no|down	no|up
GENE_001911	no|up	no|down
GENE_022330	no|down	no|down
GENE_000612	no|up	no|up
GENE_000929	no|up	no|down
GENE_022573	no|down	no|up
GENE_017986	no|up	no|down
GENE_013954	no|up	no|down
GENE_019566	no|down	no|down
GENE_001523	no|up	no|down
GENE_011772	no|down	no|up
GENE_011481	no|down	no|down
GENE_003106	no|down	no|down
GENE_022750	no|down	no|down
GENE_015670	yes|down	no|down
GENE_021110	yes|down	no|down
GENE_012721	no|down	no|up
GENE_023392	no|up	no|up
GENE_025938	no|up	yes|down
GENE_020895	no|down	no|down
GENE_003528	yes|up	no|down
GENE_016598	no|up	no|up
GENE_013098	no|down	no|down
GENE_005234	no|up	no|down
GENE_016110	no|down	no|up
GENE_000558	no|down	no|down
GENE_022562	yes|up	no|up
GENE_013943	no|down	no|up
GENE_010367	no|down	no|down
GENE_010019	yes|up	no|up
GENE_024133	no|up	no|down
GENE_009888	no|down	no|down
GENE_010966	yes|up	no|down
GENE_006463	no|down	no|down
GENE_001075	no|up	no|up
GENE_016814	no|down	no|down
GENE_001219	no|up	no|up
GENE_021839	no|down	no|down
GENE_017672	no|down	no|down
GENE_019622	no|down	no|up
GENE_014322	no|down	no|down
GENE_011482	no|up	no|down
GENE_010970	no|down	no|up
GENE_019382	no|up	no|up
GENE_003368	no|down	no|up
GENE_020068	no|down	no|down
GENE_018546	no|down	no|down
GENE_021780	no|up	no|down
GENE_004901	yes|up	no|down
GENE_019396	no|down	no|down
GENE_001204	no|down	no|down
GENE_018991	no|up	no|down
GENE_002601	no|down	no|up
GENE_002194	yes|up	no|down
GENE_005176	no|up	no|up
GENE_026295	no|down	no|down
GENE_001287	yes|up	no|up
GENE_024829	yes|up	no|down
GENE_016761	no|down	no|up
GENE_019633	no|up	no|up
GENE_020660	no|up	no|down
GENE_016819	no|up	no|down
GENE_017369	no|down	no|down
GENE_019621	no|up	no|up
GENE_017988	yes|down	yes|down
GENE_013956	no|up	no|up
GENE_014981	no|up	no|up
GENE_025062	no|up	no|down
GENE_015273	no|down	no|up
GENE_019385	yes|up	no|up
GENE_012728	no|down	no|down
GENE_002505	no|down	no|down
GENE_006477	yes|down	no|down
GENE_004657	no|down	no|up
GENE_008105	no|down	no|down
GENE_001609	yes|up	no|down
GENE_016376	yes|down	no|down
GENE_007303	no|down	no|up
GENE_005239	no|up	yes|down
GENE_007900	no|down	no|down
GENE_000626	no|down	no|down
GENE_017350	no|up	no|up
GENE_010980	yes|up	no|down
GENE_014519	no|down	no|up
GENE_014041	yes|up	no|down
GENE_020667	no|down	no|down
GENE_010969	no|down	no|up
GENE_000698	no|down	no|down
GENE_010967	no|down	no|up
GENE_008847	no|up	no|down
GENE_002519	no|up	no|down
GENE_006469	no|up	no|down
GENE_025924	no|down	no|down
GENE_005178	no|down	no|down
GENE_023564	no|down	no|up
GENE_015869	no|up	no|down
GENE_013551	yes|down	no|up
GENE_001698	no|up	no|down
GENE_000038	no|down	no|down
GENE_001522	no|up	no|down
GENE_004346	yes|up	no|down
GENE_018387	no|down	no|up
GENE_025061	no|up	no|down
GENE_025710	no|up	no|up
GENE_012580	no|down	no|up
GENE_007691	no|up	no|up
GENE_012907	yes|up	no|down
GENE_005835	no|down	no|up
GENE_005834	no|up	no|down
GENE_012058	no|down	no|down
GENE_004651	yes|down	no|down
GENE_013534	yes|down	no|up
GENE_016371	no|up	no|down
GENE_011600	no|down	no|up
GENE_011609	yes|down	no|up
GENE_007305	yes|up	no|down
GENE_001208	no|down	no|up
GENE_022111	no|down	yes|down
GENE_021821	no|up	no|down
GENE_019634	no|down	no|up
GENE_004016	yes|down	no|down
GENE_008118	no|down	no|up
GENE_010364	no|up	no|down
GENE_014193	no|down	no|down
GENE_015590	no|down	no|up
GENE_007735	no|down	no|down
GENE_024253	no|down	no|down
GENE_011962	no|down	no|down
GENE_019022	yes|up	no|down
GENE_012063	no|down	no|down
GENE_006462	no|down	no|up
GENE_001079	no|up	no|up
GENE_013732	no|down	no|down
GENE_013085	no|up	no|down
GENE_013082	yes|down	no|down
GENE_017570	no|up	yes|up
GENE_015906	no|up	no|down
GENE_015907	no|down	no|up
GENE_009413	yes|up	no|down
GENE_003103	no|up	no|up
GENE_025716	no|down	no|up
GENE_021005	no|down	no|down
GENE_006478	yes|up	no|down
GENE_002182	no|up	no|up
GENE_020065	no|up	no|down
GENE_001535	no|up	no|no test
GENE_004332	no|up	no|up
GENE_024382	no|up	no|up
GENE_025255	no|up	no|down
GENE_003642	no|down	no|up
GENE_010961	yes|down	no|down
GENE_025384	no|down	no|down
GENE_024035	no|down	no|up
GENE_024889	yes|down	no|down
GENE_020050	yes|down	no|down
GENE_022764	no|down	no|up
GENE_000616	no|down	no|down
GENE_010422	no|up	no|down
GENE_005433	no|up	no|down
GENE_014865	no|up	no|down
GENE_014989	no|up	no|up
GENE_011007	yes|up	no|down
GENE_004345	no|down	no|up
GENE_020617	no|up	no|up
GENE_012270	no|up	no|up
GENE_022247	yes|down	no|up
GENE_002186	no|down	no|up
GENE_019459	no|down	no|down
GENE_020064	no|up	no|down
GENE_001201	no|down	no|up
GENE_023382	no|down	no|down
GENE_016047	no|down	no|down
GENE_009083	no|down	no|down
GENE_010015	no|down	no|up
GENE_004331	no|down	no|down
GENE_009402	no|down	no|up
GENE_015667	no|up	no|up
GENE_011969	no|down	no|down
GENE_002193	no|up	no|down
GENE_016365	no|up	no|down
GENE_004048	no|down	no|down
GENE_020056	yes|up	no|up
GENE_003746	yes|up	no|down
GENE_010426	no|down	no|down
GENE_009649	no|down	no|down
GENE_019620	yes|down	no|up
GENE_017895	no|up	no|up
GENE_001525	no|down	no|down
GENE_001527	yes|down	no|down
GENE_011555	no|down	no|down
GENE_025719	no|down	no|down
GENE_020534	no|down	no|down
GENE_006884	no|up	no|down
GENE_017431	no|up	no|up
GENE_015671	yes|up	no|up
GENE_024422	no|up	no|up
GENE_025701	no|down	no|up
GENE_015581	no|up	no|down
GENE_008267	yes|up	no|down
GENE_007382	no|up	no|down
GENE_018816	no|up	no|up
GENE_019021	no|down	no|up
GENE_012061	yes|up	no|up
GENE_004905	no|up	no|down
GENE_024254	yes|down	no|up
GENE_008846	no|down	no|down
GENE_023569	yes|down	no|up
GENE_011964	no|up	no|up
GENE_011965	no|down	no|up
GENE_007909	no|up	no|up
GENE_020055	no|up	yes|down
GENE_024822	no|up	yes|up
GENE_001562	no|down	yes|down
GENE_025926	no|down	no|down
GENE_004918	yes|up	no|up
GENE_018602	no|up	no|up
GENE_016580	no|down	no|up
GENE_001213	no|down	no|down
GENE_017353	yes|down	no|down
GENE_018613	no|down	no|down
GENE_005437	yes|up	yes|down
GENE_017361	no|down	no|up
GENE_013555	no|down	no|up
GENE_000928	no|down	no|down
GENE_010425	no|down	no|down
GENE_013884	yes|down	no|down
GENE_021830	no|down	no|up
GENE_011001	no|up	no|up
GENE_013886	no|up	no|down
GENE_009095	no|down	no|up
GENE_022287	yes|up	no|up
GENE_025248	yes|down	yes|down
GENE_012585	yes|down	no|down
GENE_017358	no|down	no|down
GENE_019451	no|up	no|down
GENE_025932	no|down	no|down
GENE_017981	no|up	no|down
GENE_001524	no|down	no|down
GENE_000950	no|up	no|up
GENE_023574	no|down	no|down
GENE_016776	no|up	no|up
GENE_013276	no|down	no|up
GENE_016777	no|up	no|down
GENE_016594	no|down	no|down
GENE_011468	yes|down	no|up
GENE_010604	no|down	no|down
GENE_010353	yes|down	no|down
GENE_001686	yes|up	no|up
GENE_004014	yes|down	no|up
GENE_020995	no|up	no|down
GENE_014995	yes|down	no|down
GENE_013894	yes|down	no|down
GENE_009892	no|up	no|down
GENE_002294	no|down	no|down
GENE_014047	yes|up	no|down
GENE_009409	no|down	no|up
GENE_014180	no|up	no|up
GENE_025241	yes|up	no|up
GENE_012900	no|down	no|up
GENE_002507	no|down	no|up
GENE_008859	no|down	yes|down
GENE_023715	no|up	no|down
GENE_023418	yes|down	no|up
GENE_020062	no|up	no|down
GENE_007307	no|up	no|down
GENE_013722	yes|down	no|up
GENE_016591	no|down	no|down
GENE_014652	no|up	no|down
GENE_000083	no|down	no|up
GENE_009089	no|down	no|down
GENE_004017	no|down	no|up
GENE_020991	no|down	no|down
GENE_014993	no|up	no|up
GENE_014999	no|up	no|down
GENE_015388	no|down	no|down
GENE_015663	yes|up	no|down
GENE_009442	no|down	no|down
GENE_011713	yes|down	no|up
GENE_019466	yes|up	no|up
GENE_006247	no|down	no|down
GENE_013089	no|down	no|down
GENE_016106	no|up	no|up
GENE_026283	no|down	no|up
GENE_019627	no|up	no|down
GENE_022577	yes|down	no|up
GENE_015902	no|down	no|down
GENE_025063	no|up	no|down
GENE_025065	no|up	no|down
GENE_010506	no|up	no|down
GENE_023398	no|down	no|down
GENE_008855	no|up	no|up
GENE_011046	no|down	no|down
GENE_004895	no|down	no|down
GENE_023149	no|up	no|down
GENE_017427	yes|down	no|down
GENE_017643	no|down	no|down
GENE_010368	no|down	no|up
GENE_011014	no|up	no|down
GENE_014040	yes|up	no|up
GENE_004338	no|up	no|up
GENE_020546	no|down	no|up
GENE_008264	no|down	no|up
GENE_024256	no|up	no|down
GENE_009645	no|down	no|down
GENE_016651	no|up	no|up
GENE_017871	no|up	no|down
GENE_012242	no|down	no|down
GENE_023384	no|down	no|up
GENE_008112	no|up	no|down
GENE_005170	yes|down	no|down
GENE_009003	yes|down	no|down
GENE_011712	no|up	yes|down
GENE_001071	yes|up	no|down
GENE_019806	no|down	no|down
GENE_016762	no|up	no|down
GENE_005207	no|up	no|down
GENE_016107	no|up	no|up
GENE_013552	no|up	no|up
GENE_017989	yes|up	no|down
GENE_000031	no|up	no|down
GENE_014984	no|down	no|down
GENE_011558	no|up	no|down
GENE_011552	no|up	no|up
GENE_024623	no|down	no|up
GENE_025247	no|up	no|down
GENE_019381	no|up	no|down
GENE_012587	no|up	no|up
GENE_012276	no|down	no|down
GENE_005833	no|down	yes|down
GENE_015583	no|down	no|up
GENE_005837	no|down	no|down
GENE_002502	no|up	no|down
GENE_006470	no|up	no|down
GENE_001509	no|up	no|down
GENE_017356	no|down	no|down
GENE_001538	no|down	no|up
GENE_009883	no|up	no|up
GENE_024645	yes|up	no|up
GENE_008260	no|up	no|down
GENE_008991	no|down	no|down
GENE_003356	no|up	no|down
GENE_006464	no|down	no|down
GENE_021235	no|up	no|up
GENE_024821	no|down	no|down
GENE_013084	no|down	no|down
GENE_018618	no|down	no|down
GENE_016108	no|up	yes|up
GENE_019625	no|down	no|down
GENE_003733	no|up	no|up
GENE_013594	no|down	no|up
GENE_021002	no|down	no|up
GENE_008271	no|down	no|up
GENE_011956	no|up	no|down
GENE_019030	no|up	no|up
GENE_002501	no|up	no|down
GENE_019453	yes|up	no|down
GENE_001067	no|up	no|down
GENE_001209	no|up	no|up
GENE_016671	yes|up	no|down
GENE_007963	no|down	no|up
GENE_010775	no|down	no|down
GENE_015662	no|up	no|down
GENE_011967	no|down	no|down
GENE_003358	no|down	no|down
GENE_003826	no|down	no|down
GENE_019150	no|down	no|down
GENE_002459	no|up	no|down
GENE_013731	no|down	no|up
GENE_001113	no|up	no|down
GENE_013885	no|down	no|down
GENE_001526	no|down	no|up
GENE_011009	no|down	no|up
GENE_015904	no|down	no|down
GENE_015270	no|down	yes|up
GENE_015279	no|down	no|up
GENE_006888	no|up	no|up
GENE_010976	yes|up	no|up
GENE_020285	yes|up	no|up
GENE_012271	yes|up	no|down
GENE_012729	no|down	no|down
GENE_018101	no|up	no|down
GENE_019811	no|up	no|down
GENE_024833	no|up	no|up
GENE_000624	no|down	no|down
GENE_003829	yes|down	no|down
GENE_020849	no|down	no|up
GENE_000489	yes|up	no|up
GENE_010884	yes|down	no|up
GENE_000080	yes|down	no|up
GENE_007112	no|down	no|down
GENE_011764	no|up	no|down
GENE_014048	no|down	no|down
GENE_004335	no|down	no|down
GENE_025016	no|up	no|up
GENE_013509	no|down	no|up
GENE_015380	no|down	no|down
GENE_020528	no|up	yes|up
GENE_025728	no|up	yes|up
GENE_012047	no|up	no|down
GENE_008132	no|down	no|up
GENE_009344	no|up	no|down
GENE_020857	no|down	no|down
GENE_010376	no|down	no|down
GENE_010372	yes|up	no|up
GENE_011026	no|down	no|up
GENE_010001	no|down	no|up
GENE_020676	yes|down	no|down
GENE_010950	no|down	no|down
GENE_015079	no|up	no|up
GENE_019050	yes|up	no|up
GENE_005814	no|down	no|up
GENE_022823	yes|up	no|down
GENE_007324	no|down	no|up
GENE_022462	yes|up	no|down
GENE_018085	no|up	no|down
GENE_014283	no|up	no|up
GENE_018007	no|up	no|no test
GENE_017881	no|down	no|up
GENE_020641	no|down	no|up
GENE_006033	no|down	no|down
GENE_003984	yes|up	no|down
GENE_025232	no|down	no|up
GENE_022744	no|down	no|down
GENE_020293	no|down	no|up
GENE_003112	no|up	no|up
GENE_002574	no|down	no|up
GENE_016346	no|up	no|up
GENE_023189	no|down	no|up
GENE_007913	no|down	no|up
GENE_026116	yes|up	no|up
GENE_017432	yes|up	no|up
GENE_020982	no|up	no|up
GENE_021453	no|down	no|up
GENE_009875	no|down	no|up
GENE_006792	no|down	no|up
GENE_013229	yes|up	no|up
GENE_004496	no|up	no|down
GENE_017158	no|down	no|down
GENE_021202	no|down	no|up
GENE_008124	no|down	no|up
GENE_020088	no|up	no|up
GENE_010997	yes|up	no|down
GENE_007935	no|down	no|up
GENE_013086	no|down	no|down
GENE_004927	yes|up	no|down
GENE_017081	no|up	no|down
GENE_003435	no|up	no|down
GENE_000579	no|up	no|down
GENE_000570	no|down	no|up
GENE_011705	no|down	no|up
GENE_017664	no|up	no|down
GENE_010030	no|up	no|up
GENE_009596	no|down	no|down
GENE_021686	no|up	no|down
GENE_011497	no|up	no|down
GENE_007960	no|up	no|down
GENE_009668	no|down	no|down
GENE_009404	yes|up	no|down
GENE_012267	yes|up	no|up
GENE_020668	no|up	no|down
GENE_020523	no|down	no|down
GENE_025014	no|down	no|up
GENE_021038	yes|up	no|up
GENE_015642	no|down	no|down
GENE_007688	no|up	no|down
GENE_007684	no|up	no|up
GENE_007682	no|down	no|up
GENE_010646	no|down	no|up
GENE_016749	no|down	no|up
GENE_000635	no|down	no|down
GENE_000542	no|up	no|down
GENE_019803	no|down	no|down
GENE_002892	no|down	no|up
GENE_013571	yes|up	no|down
GENE_010003	no|up	no|down
GENE_004323	no|down	no|down
GENE_020674	no|down	no|down
GENE_011771	no|up	no|down
GENE_016568	yes|up	no|down
GENE_003563	yes|down	no|down
GENE_014704	no|down	no|down
GENE_024170	no|up	no|up
GENE_024175	yes|down	no|down
GENE_000599	no|up	no|up
GENE_005038	no|up	no|down
GENE_017404	no|down	no|down
GENE_020864	no|down	no|down
GENE_017088	yes|up	no|down
GENE_009598	no|up	no|down
GENE_018004	yes|down	no|down
GENE_019282	yes|down	no|down
GENE_025036	no|down	no|down
GENE_020294	no|up	no|down
GENE_015647	no|up	no|up
GENE_011943	no|down	no|down
GENE_001733	no|down	no|down
GENE_019040	no|up	no|up
GENE_023761	no|down	no|up
GENE_010472	no|up	no|up
GENE_016348	yes|down	no|down
GENE_020074	no|up	no|up
GENE_018804	no|down	no|down
GENE_013715	no|up	no|down
GENE_013394	no|down	no|down
GENE_021857	yes|down	no|up
GENE_014298	no|down	no|down
GENE_011715	no|down	no|down
GENE_021450	no|up	no|down
GENE_009872	no|down	no|up
GENE_011027	yes|up	no|down
GENE_024354	no|down	no|up
GENE_006081	no|up	no|up
GENE_020515	no|no test	yes|down
GENE_021638	no|up	no|up
GENE_018835	yes|up	no|down
GENE_013382	no|down	no|up
GENE_004311	no|down	no|up
GENE_004610	no|down	no|up
GENE_025637	no|down	no|up
GENE_022291	no|down	no|down
GENE_004480	no|down	no|up
GENE_020526	no|down	no|down
GENE_021030	no|down	no|up
GENE_012593	no|up	no|up
GENE_012598	no|up	no|up
GENE_007680	no|down	no|up
GENE_012263	no|up	no|up
GENE_005822	no|up	no|down
GENE_012111	yes|down	no|up
GENE_023567	no|up	no|down
GENE_004660	no|up	no|up
GENE_023768	yes|down	no|down
GENE_023508	yes|up	no|up
GENE_010872	no|down	no|down
GENE_005222	yes|up	no|down
GENE_017436	no|up	no|up
GENE_024993	no|up	no|up
GENE_008322	no|down	no|down
GENE_019602	no|down	no|down
GENE_000541	no|down	no|down
GENE_001420	no|up	no|up
GENE_000493	no|down	no|down
GENE_000495	no|up	yes|down
GENE_010447	no|down	no|up
GENE_003898	no|down	no|up
GENE_008817	yes|down	no|down
GENE_024351	no|up	no|down
GENE_021026	no|up	no|down
GENE_005818	no|down	no|up
GENE_020311	yes|down	no|down
GENE_006245	no|up	no|down
GENE_026104	no|down	no|down
GENE_011701	yes|up	no|up
GENE_004313	no|up	no|down
GENE_025030	no|up	yes|up
GENE_012264	no|down	no|down
GENE_012735	no|up	no|down
GENE_021218	no|up	no|up
GENE_018808	no|down	no|down
GENE_019827	yes|up	no|down
GENE_010659	no|down	no|down
GENE_022471	yes|down	no|down
GENE_004938	no|down	no|down
GENE_006960	no|up	no|down
GENE_017345	no|down	no|down
GENE_021586	no|down	no|up
GENE_005876	yes|up	no|down
GENE_008323	no|up	no|down
GENE_013979	no|down	no|down
GENE_000013	no|down	no|down
GENE_004062	no|up	no|down
GENE_002048	no|up	no|down
GENE_020671	no|down	no|up
GENE_004497	no|down	no|down
GENE_010959	yes|down	no|down
GENE_015254	no|down	yes|down
GENE_025914	no|down	no|down
GENE_008120	yes|down	no|up
GENE_007938	no|down	no|down
GENE_003788	no|up	no|down
GENE_019838	yes|down	no|down
GENE_023196	no|down	no|down
GENE_017400	no|down	no|up
GENE_019612	no|down	no|down
GENE_013708	yes|down	no|up
GENE_013960	no|up	no|down
GENE_017666	yes|up	no|down
GENE_006782	no|down	no|up
GENE_012447	no|down	no|up
GENE_010944	no|up	no|down
GENE_003595	no|down	yes|up
GENE_002578	no|up	no|up
GENE_015679	no|down	no|up
GENE_025908	no|up	no|down
GENE_023505	no|down	no|up
GENE_006226	no|down	no|up
GENE_004939	no|up	no|down
GENE_001231	no|down	no|up
GENE_001941	no|down	no|up
GENE_001940	no|up	no|down
GENE_005921	no|down	no|down
GENE_021859	no|up	no|up
GENE_019544	yes|up	no|down
GENE_011718	no|up	no|down
GENE_009473	no|up	no|up
GENE_024357	no|down	no|down
GENE_015073	no|down	no|up
GENE_013519	no|up	no|down
GENE_005816	no|up	no|down
GENE_002565	no|down	no|no test
GENE_008832	no|down	no|up
GENE_020316	no|up	no|down
GENE_000267	yes|up	no|up
GENE_005036	no|down	no|down
GENE_007322	no|down	no|up
GENE_022161	yes|up	no|up
GENE_007919	yes|down	no|down
GENE_006405	no|up	no|down
GENE_019824	no|up	no|up
GENE_000639	no|down	no|up
GENE_021580	yes|up	no|down
GENE_000019	no|up	no|down
GENE_009876	no|down	no|down
GENE_020513	no|up	no|down
GENE_021220	yes|up	no|down
GENE_023772	no|down	no|down
GENE_002783	no|down	yes|down
GENE_022134	yes|down	no|down
GENE_013388	yes|down	no|no test
GENE_021843	no|up	no|down
GENE_017368	no|down	no|down
GENE_019718	no|down	no|up
GENE_017885	no|up	no|down
GENE_025033	no|down	no|down
GENE_025035	no|down	no|down
GENE_022296	no|down	no|down
GENE_025725	no|up	yes|up
GENE_025722	no|down	no|up
GENE_000217	yes|down	no|up
GENE_010945	no|up	no|up
GENE_011515	no|down	no|up
GENE_014486	no|down	no|down
GENE_023363	no|down	no|up
GENE_023367	no|up	no|down
GENE_006403	no|down	no|up
GENE_017331	yes|down	no|up
GENE_003096	no|up	no|up
GENE_023184	no|down	no|up
GENE_000462	no|up	no|down
GENE_013976	yes|up	no|down
GENE_000011	no|down	no|down
GENE_000498	no|down	no|down
GENE_000497	no|down	no|up
GENE_020514	no|down	no|up
GENE_018235	no|down	no|up
GENE_015259	no|up	no|up
GENE_024177	no|down	no|up
GENE_021209	no|up	no|down
GENE_016352	no|up	no|up
GENE_006231	yes|down	no|down
GENE_017405	no|up	no|down
GENE_013381	no|up	no|down
GENE_001552	no|down	no|down
GENE_017880	no|down	no|up
GENE_017884	no|up	no|down
GENE_013563	no|up	no|down
GENE_000977	no|down	yes|up
GENE_006785	no|down	no|down
GENE_020643	no|down	no|down
GENE_020647	no|up	no|down
GENE_009460	yes|up	no|down
GENE_011491	no|down	no|down
GENE_022749	no|down	no|down
GENE_000212	no|up	no|down
GENE_008037	no|down	no|down
GENE_020525	no|down	no|down
GENE_012265	no|up	no|up
GENE_003117	no|down	no|down
GENE_012732	yes|up	no|down
GENE_002570	no|down	no|up
GENE_018554	no|down	no|up
GENE_007207	no|up	no|down
GENE_017342	no|up	yes|up
GENE_013877	no|up	no|up
GENE_020855	no|up	no|up
GENE_014225	no|up	no|down
GENE_015255	no|down	no|up
GENE_012595	no|down	no|down
GENE_023379	no|down	no|down
GENE_012597	no|down	no|up
GENE_014962	yes|down	no|down
GENE_015643	no|up	no|down
GENE_005789	no|up	no|up
GENE_007683	no|up	no|down
GENE_008920	no|up	no|up
GENE_025906	no|down	no|up
GENE_023191	yes|up	no|down
GENE_023502	yes|up	no|up
GENE_016757	no|up	no|up
GENE_010303	yes|down	no|up
GENE_001226	no|down	no|down
GENE_010305	no|down	no|down
GENE_001952	no|down	no|up
GENE_021851	no|down	no|up
GENE_017406	yes|up	no|up
GENE_001675	yes|up	no|down
GENE_019619	no|down	no|down
GENE_018010	no|down	no|down
GENE_014287	no|down	no|up
GENE_021457	no|up	no|down
GENE_014285	no|down	no|down
GENE_019800	no|down	no|up
GENE_013845	yes|up	no|up
GENE_000496	no|down	no|down
GENE_001554	no|down	no|up
GENE_011029	no|up	no|down
GENE_018005	no|down	no|down
GENE_010780	no|up	no|down
GENE_025636	no|up	no|up
GENE_004322	no|up	no|up
GENE_009475	no|down	no|down
GENE_010954	yes|down	no|down
GENE_014708	no|up	no|up
GENE_015655	no|up	no|down
GENE_015780	no|up	no|down
GENE_005810	no|down	no|down
GENE_006418	no|up	no|up
GENE_004676	no|down	no|up
GENE_022735	no|up	no|up
GENE_020773	no|up	no|down
GENE_013380	no|down	no|up
GENE_011638	yes|up	no|up
GENE_019616	no|up	no|down
GENE_009863	no|up	no|down
GENE_004318	no|up	no|up
GENE_000851	no|down	no|up
GENE_024340	no|down	no|up
GENE_009400	no|up	no|down
GENE_025017	no|down	no|down
GENE_009665	no|up	no|down
GENE_010941	no|up	no|down
GENE_010942	yes|up	no|down
GENE_005821	no|down	yes|down
GENE_002577	yes|down	no|up
GENE_015633	no|up	no|down
GENE_001051	no|up	no|up
GENE_021148	no|down	no|down
GENE_004934	yes|up	no|down
GENE_013399	no|down	no|up
GENE_024992	no|down	no|up
GENE_020859	no|down	no|down
GENE_020853	no|up	no|down
GENE_019601	no|down	no|up
GENE_004149	no|down	no|up
GENE_019801	no|down	no|down
GENE_017652	no|down	no|down
GENE_009478	yes|up	no|down
GENE_015075	no|down	no|up
GENE_007679	no|down	no|down
GENE_015256	no|down	no|down
GENE_016769	yes|down	no|down
GENE_024983	no|down	no|up
GENE_017087	no|down	no|down
GENE_001555	no|down	no|up
GENE_013569	no|down	no|down
GENE_009860	no|down	no|down
GENE_009868	no|up	no|up
GENE_009463	no|down	no|down
GENE_015017	no|down	no|down
GENE_010640	no|down	no|down
GENE_004669	no|down	no|up
GENE_023763	no|down	no|down
GENE_023504	no|up	no|down
GENE_020077	no|down	no|up
GENE_004932	yes|up	no|down
GENE_001949	no|up	no|up
GENE_000632	no|up	no|down
GENE_017430	no|down	no|up
GENE_022218	no|down	no|down
GENE_000948	no|up	no|up
GENE_023514	no|down	no|down
GENE_013220	yes|up	no|down
GENE_003787	no|down	no|down
GENE_007090	no|up	no|up
GENE_007095	no|up	no|down
GENE_001046	yes|down	no|down
GENE_005787	no|up	no|up
GENE_016284	no|down	no|up
GENE_016288	no|up	no|down
GENE_001225	no|down	no|down
GENE_019617	yes|down	no|up
GENE_017084	no|down	no|no test
GENE_014289	no|up	no|down
GENE_014779	no|down	no|down
GENE_000975	no|up	no|down
GENE_009865	no|down	no|up
GENE_009461	no|down	no|up
GENE_024341	no|down	no|up
GENE_025013	no|down	no|down
GENE_002442	yes|up	no|down
GENE_023361	no|down	no|down
GENE_021219	no|down	no|down
GENE_008130	no|down	no|down
GENE_001058	no|down	yes|up
GENE_016290	no|up	yes|down
GENE_013718	no|down	no|down
GENE_013390	no|down	no|down
GENE_022109	no|down	no|down
GENE_011654	yes|down	no|up
GENE_019549	yes|up	no|down
GENE_010371	yes|down	yes|down
GENE_011537	no|up	no|up
GENE_011021	no|down	no|down
GENE_010000	no|up	no|up
GENE_017566	no|down	no|down
GENE_025003	no|down	no|up
GENE_024607	no|up	no|down
GENE_024359	no|down	no|down
GENE_018570	no|up	no|down
GENE_014701	no|down	no|down
GENE_002562	no|down	yes|up
GENE_023375	no|up	no|up
GENE_016350	yes|up	no|up
GENE_001229	no|down	no|up
GENE_016134	no|up	no|up
GENE_001556	no|down	no|down
GENE_017883	no|up	no|up
GENE_009866	no|up	no|up
GENE_006786	no|down	no|up
GENE_022294	no|up	no|down
GENE_007966	no|down	yes|up
GENE_011948	no|down	no|up
GENE_012914	no|up	no|down
GENE_003115	yes|up	no|up
GENE_005378	no|down	no|up
GENE_025907	no|down	no|down
GENE_002795	no|down	no|up
GENE_016291	no|up	no|no test
GENE_005226	yes|up	no|down
GENE_013878	no|up	no|up
GENE_019548	no|up	no|up
GENE_000016	no|down	no|up
GENE_006795	no|up	no|down
GENE_025739	no|down	no|down
GENE_020519	no|down	no|down
GENE_014703	no|down	no|down
GENE_023370	yes|up	no|up
GENE_023372	no|up	no|down
GENE_022353	yes|up	no|down
GENE_021205	no|down	no|down
GENE_016358	no|down	no|up
GENE_011531	yes|up	no|up
GENE_023193	no|up	no|down
GENE_024987	yes|up	no|down
GENE_011251	yes|up	no|up
GENE_013705	no|up	yes|down
GENE_014282	no|up	no|up
GENE_000577	yes|down	no|down
GENE_019280	no|up	no|down
GENE_025031	no|down	no|down
GENE_023769	no|up	no|up
GENE_021217	no|down	no|up
GENE_011990	no|down	no|down
GENE_018551	no|down	no|up
GENE_007911	no|up	no|down
GENE_007918	no|down	no|up
GENE_005228	no|up	no|down
GENE_013396	no|down	no|down
GENE_024997	no|down	no|down
GENE_020854	no|up	no|up
GENE_000544	yes|down	no|down
GENE_018015	no|up	no|up
GENE_004069	no|up	no|down
GENE_003744	yes|down	no|down
GENE_002549	no|down	no|down
GENE_009696	no|up	yes|down
GENE_009694	no|down	no|up
GENE_013190	yes|down	no|down
GENE_000922	no|up	no|down
GENE_014706	no|up	no|down
GENE_007671	no|down	no|down
GENE_015467	no|down	no|up
GENE_002568	no|down	no|up
GENE_023513	no|up	yes|down
GENE_003783	no|down	no|up
GENE_005033	no|down	no|down
GENE_007329	no|down	no|up
GENE_001220	no|up	no|down
GENE_013384	no|up	no|up
GENE_006885	no|up	no|down
GENE_020865	yes|down	no|up
GENE_011321	no|down	no|up
GENE_017887	no|down	no|down
GENE_021319	no|up	no|up
GENE_007306	no|down	yes|down
GENE_011033	no|up	no|down
GENE_011038	yes|up	no|up
GENE_004288	no|up	no|down
GENE_002559	no|down	no|up
GENE_012711	no|down	no|down
GENE_023523	no|up	no|down
GENE_016728	no|up	no|up
GENE_024973	no|up	no|up
GENE_007347	no|down	no|down
GENE_017098	no|up	no|up
GENE_000569	no|up	no|down
GENE_009094	yes|down	no|down
GENE_009853	no|down	no|up
GENE_001793	no|down	no|down
GENE_009322	no|down	no|down
GENE_011512	yes|down	no|down
GENE_012896	no|down	no|up
GENE_012949	no|down	no|down
GENE_024401	no|down	no|up
GENE_012368	no|down	no|no test
GENE_007346	no|down	no|up
GENE_001792	no|up	no|down
GENE_013764	no|up	no|down
GENE_022783	no|up	no|up
GENE_022780	no|down	no|up
GENE_011980	no|down	no|down
GENE_003080	no|up	no|down
GENE_003394	no|down	no|down
GENE_011035	no|down	no|down
GENE_025213	no|down	no|down
GENE_013881	no|up	no|down
GENE_025697	no|up	no|up
GENE_021740	no|up	no|down
GENE_023698	no|up	no|down
GENE_021273	no|down	no|down
GENE_004136	no|up	no|up
GENE_005796	no|up	no|down
GENE_006206	no|up	no|down
GENE_015798	yes|up	no|up
GENE_019667	no|up	no|up
GENE_026313	yes|up	no|down
GENE_007537	no|down	no|up
GENE_012893	no|down	no|down
GENE_025681	yes|up	no|up
GENE_003141	no|down	no|up
GENE_003322	no|down	no|up
GENE_007490	no|up	no|down
GENE_014502	no|down	no|down
GENE_005491	no|down	no|up
GENE_005279	no|down	no|down
GENE_021461	no|up	no|down
GENE_026308	yes|down	no|up
GENE_002520	no|down	no|down
GENE_022253	no|up	no|down
GENE_007509	no|down	no|down
GENE_007508	no|down	no|down
GENE_013768	yes|up	yes|down
GENE_007524	no|down	no|up
GENE_023345	no|down	no|up
GENE_001961	yes|up	no|up
GENE_026135	yes|up	no|down
GENE_019294	no|down	no|up
GENE_025027	no|up	no|down
GENE_025023	yes|down	no|down
GENE_025029	no|up	no|down
GENE_014494	no|up	no|up
GENE_015019	yes|down	yes|down
GENE_012892	no|up	no|up
GENE_022807	yes|down	no|down
GENE_011006	no|down	no|down
GENE_009893	no|up	no|up
GENE_016736	no|up	no|up
GENE_016730	no|down	no|down
GENE_014263	no|down	no|up
GENE_001574	no|down	no|up
GENE_014009	no|down	no|up
GENE_009335	no|down	no|down
GENE_010907	no|up	no|down
GENE_011504	no|up	no|down
GENE_015608	no|down	no|down
GENE_011039	no|down	no|down
GENE_015002	no|down	no|down
GENE_002228	no|up	no|up
GENE_008155	no|down	no|up
GENE_021271	no|down	no|up
GENE_020094	no|up	no|up
GENE_019840	no|down	no|down
GENE_024450	no|down	no|down
GENE_017419	yes|up	no|down
GENE_026130	no|down	no|up
GENE_024970	yes|up	no|down
GENE_020344	no|down	no|up
GENE_006866	no|down	no|up
GENE_001568	no|up	no|down
GENE_018030	no|down	no|up
GENE_007601	no|up	no|down
GENE_014014	no|down	no|up
GENE_009454	no|down	no|up
GENE_022245	no|down	yes|up
GENE_025022	yes|up	no|up
GENE_015015	yes|up	yes|down
GENE_014729	no|down	no|down
GENE_008325	yes|up	no|down
GENE_004695	no|down	no|up
GENE_019858	no|down	yes|up
GENE_007343	no|down	no|down
GENE_013769	no|up	no|down
GENE_001572	no|up	yes|down
GENE_002842	no|up	no|down
GENE_021460	yes|down	no|down
GENE_015903	no|up	no|up
GENE_018203	no|down	no|down
GENE_025966	yes|down	no|down
GENE_018859	no|up	no|down
GENE_020092	yes|up	no|down
GENE_017096	no|down	no|down
GENE_017675	no|down	no|up
GENE_009329	no|down	yes|down
GENE_025021	yes|up	no|up
GENE_004002	no|down	no|up
GENE_018127	no|down	no|no test
GENE_022806	no|down	no|up
GENE_009891	no|down	no|up
GENE_021713	no|down	no|up
GENE_021869	yes|down	no|down
GENE_017063	no|down	no|up
GENE_014269	no|down	no|down
GENE_017280	no|down	no|up
GENE_001577	no|down	no|up
GENE_002844	no|down	no|down
GENE_016710	yes|down	no|no test
GENE_023104	no|down	no|down
GENE_023108	no|down	no|up
GENE_015027	no|down	no|down
GENE_019069	no|down	no|down
GENE_012933	yes|up	no|no test
GENE_025696	no|down	no|down
GENE_019066	yes|up	no|down
GENE_003177	no|down	no|up
GENE_002553	no|down	no|down
GENE_003318	yes|down	no|down
GENE_004683	no|down	no|up
GENE_023527	yes|up	no|down
GENE_015779	no|up	no|up
GENE_019847	no|up	no|up
GENE_001033	no|down	no|up
GENE_001031	yes|up	no|down
GENE_016613	no|up	no|down
GENE_019665	no|down	no|up
GENE_017093	no|up	no|up
GENE_011732	no|up	no|up
GENE_013591	no|up	no|no test
GENE_013590	no|down	no|up
GENE_000960	yes|down	yes|down
GENE_010025	no|up	no|up
GENE_022790	no|up	no|down
GENE_007531	no|up	no|down
GENE_000215	no|down	no|no test
GENE_018270	no|up	no|up
GENE_003543	yes|down	no|no test
GENE_005871	yes|down	no|down
GENE_022466	no|down	no|up
GENE_002548	no|down	no|down
GENE_024086	yes|up	yes|up
GENE_023530	no|up	no|down
GENE_008936	yes|down	no|up
GENE_026126	no|up	no|down
GENE_000900	yes|up	no|up
GENE_019673	no|down	no|up
GENE_020500	no|down	no|up
GENE_001579	yes|up	no|down
GENE_019519	no|down	no|up
GENE_015021	no|down	no|up
GENE_011059	no|up	no|down
GENE_021051	no|down	no|down
GENE_020501	no|down	no|down
GENE_021057	no|up	no|down
GENE_012938	yes|down	no|up
GENE_008480	no|up	no|down
GENE_002226	no|down	no|down
GENE_015773	no|up	no|down
GENE_012209	yes|up	no|up
GENE_001786	yes|down	no|down
GENE_019990	no|down	yes|up
GENE_021872	no|up	no|down
GENE_008347	no|down	no|down
GENE_026311	no|down	no|up
GENE_005907	yes|down	no|up
GENE_013593	no|down	no|down
GENE_019290	no|up	no|up
GENE_020654	no|down	no|up
GENE_020652	no|down	no|down
GENE_021042	no|up	yes|up
GENE_011040	no|up	no|down
GENE_005875	no|down	no|down
GENE_002235	no|up	no|down
GENE_024400	no|down	yes|down
GENE_023682	no|down	no|up
GENE_008145	no|down	no|up
GENE_020276	yes|down	no|down
GENE_019853	no|down	no|up
GENE_007344	yes|down	no|down
GENE_001973	yes|up	no|down
GENE_001977	no|down	no|down
GENE_026123	no|down	no|down
GENE_019982	no|up	no|down
GENE_001379	no|up	no|down
GENE_017600	no|up	no|up
GENE_010054	no|down	no|up
GENE_008790	no|up	no|down
GENE_011052	no|down	no|down
GENE_025691	yes|up	no|down
GENE_003170	no|up	no|down
GENE_024161	no|down	no|down
GENE_004689	no|up	no|up
GENE_021270	no|down	no|down
GENE_003794	no|down	no|up
GENE_019842	no|down	no|down
GENE_005020	no|down	no|up
GENE_026133	no|down	no|up
GENE_017417	yes|up	no|up
GENE_019994	yes|up	no|down
GENE_010773	no|up	yes|down
GENE_000780	no|up	no|up
GENE_019662	no|down	no|up
GENE_013918	yes|down	no|down
GENE_017897	no|up	no|down
GENE_009857	yes|up	no|down
GENE_004303	no|down	no|down
GENE_020656	no|down	no|down
GENE_009458	no|up	no|up
GENE_008226	no|down	yes|down
GENE_014499	no|down	no|up
GENE_014491	no|up	no|down
GENE_015016	no|down	no|down
GENE_018211	no|up	no|down
GENE_012766	no|up	no|up
GENE_012092	no|down	no|down
GENE_003893	no|down	no|down
GENE_007491	no|down	no|up
GENE_022800	no|down	no|down
GENE_015420	no|up	no|up
GENE_001022	no|up	no|up
GENE_018851	no|down	no|down
GENE_018588	yes|down	no|down
GENE_020133	no|down	no|up
GENE_011925	yes|down	no|up
GENE_013346	yes|down	no|down
GENE_009396	yes|up	no|down
GENE_018456	no|down	no|down
GENE_004470	no|down	no|down
GENE_009330	no|down	no|up
GENE_014487	no|down	no|up
GENE_000224	no|up	no|up
GENE_012718	no|down	no|up
GENE_004688	no|up	no|down
GENE_009973	no|up	no|down
GENE_016729	no|up	no|down
GENE_001787	no|up	no|up
GENE_021873	no|down	no|up
GENE_000782	no|down	no|up
GENE_000564	no|up	no|down
GENE_000568	no|up	no|down
GENE_004045	no|up	yes|down
GENE_021477	no|down	no|down
GENE_004302	no|down	no|up
GENE_003344	yes|down	no|down
GENE_003544	no|down	no|down
GENE_011992	no|up	no|down
GENE_012945	yes|down	yes|down
GENE_023756	no|down	no|up
GENE_021262	no|down	no|up
GENE_018852	yes|up	yes|down
GENE_005271	no|down	no|up
GENE_017067	no|down	no|up
GENE_025069	no|down	no|up
GENE_002026	no|down	no|down
GENE_009447	no|up	no|down
GENE_010902	no|up	no|down
GENE_012712	no|down	no|up
GENE_004681	yes|up	no|up
GENE_004680	no|down	no|down
GENE_021274	yes|up	no|up
GENE_005240	no|up	yes|up
GENE_022120	yes|up	no|down
GENE_016616	no|down	no|down
GENE_006869	no|up	no|down
GENE_015795	no|down	no|down
GENE_022241	no|down	no|up
GENE_009455	no|up	no|down
GENE_003284	no|up	no|down
GENE_010933	no|down	yes|up
GENE_012897	no|up	no|up
GENE_014728	no|up	no|down
GENE_007650	no|up	no|down
GENE_009142	no|down	no|down
GENE_022808	no|down	yes|down
GENE_012369	no|down	no|down
GENE_007349	no|down	no|up
GENE_017463	no|down	no|up
GENE_013617	no|up	no|down
GENE_000774	no|up	no|up
GENE_000327	no|up	no|up
GENE_011728	no|down	no|up
GENE_010909	no|down	no|down
GENE_022787	no|down	no|up
GENE_009848	yes|up	no|down
GENE_003551	no|down	no|down
GENE_015604	no|up	no|down
GENE_025217	yes|up	no|down
GENE_000207	no|up	no|down
GENE_003577	no|up	no|up
GENE_019068	no|up	no|down
GENE_007666	no|up	no|up
GENE_024165	no|up	no|up
GENE_025962	no|down	no|down
GENE_017183	no|down	no|up
GENE_018829	yes|up	no|up
GENE_017210	no|up	no|up
GENE_001783	no|down	no|down
GENE_001969	no|up	no|up
GENE_004449	no|no test	no|down
GENE_010771	yes|up	no|up
GENE_004301	no|up	no|up
GENE_025755	no|down	no|down
GENE_014493	no|down	no|up
GENE_007538	no|down	no|up
GENE_007532	no|down	no|down
GENE_011041	no|up	no|down
GENE_020315	no|up	no|down
GENE_008149	no|down	no|down
GENE_006211	yes|down	no|up
GENE_020134	no|up	no|up
GENE_000901	no|down	no|up
GENE_000995	no|down	no|down
GENE_000222	yes|up	no|down
GENE_012881	no|up	no|up
GENE_021054	no|up	no|down
GENE_021052	no|up	no|down
GENE_023028	no|down	no|up
GENE_019064	no|down	no|up
GENE_005803	no|up	no|down
GENE_002558	no|down	no|up
GENE_023522	no|down	no|down
GENE_005021	yes|up	no|up
GENE_005022	no|up	no|down
GENE_001781	no|down	no|up
GENE_026132	no|down	no|down
GENE_019997	no|up	no|up
GENE_000566	yes|up	no|down
GENE_000962	yes|up	no|down
GENE_020657	no|down	no|down
GENE_011998	no|up	no|down
GENE_007655	no|down	no|down
GENE_008321	no|up	no|up
GENE_009144	no|down	no|down
GENE_023357	yes|up	no|up
GENE_024153	yes|up	no|down
GENE_006439	no|up	no|down
GENE_016397	no|down	no|up
GENE_005014	no|up	no|down
GENE_018855	no|up	no|down
GENE_013612	no|down	no|up
GENE_016627	yes|up	no|down
GENE_010588	no|down	no|down
GENE_019512	no|down	no|down
GENE_011726	yes|up	no|down
GENE_002930	no|down	no|up
GENE_010055	no|down	yes|down
GENE_020387	no|up	no|up
GENE_006848	no|up	no|down
GENE_022254	no|down	yes|up
GENE_024894	no|down	no|up
GENE_011505	no|down	no|up
GENE_006781	no|down	no|down
GENE_012556	no|up	no|down
GENE_014732	no|up	no|down
GENE_000205	no|up	no|down
GENE_011031	no|up	no|down
GENE_018582	no|up	no|up
GENE_005029	no|up	no|down
GENE_001963	no|down	no|up
GENE_013771	no|down	no|up
GENE_001569	no|down	no|down
GENE_021479	no|up	no|down
GENE_011736	no|up	no|up
GENE_004305	no|down	no|down
GENE_007539	no|down	no|down
GENE_012545	no|down	no|down
GENE_012895	no|down	no|down
GENE_019077	no|down	no|up
GENE_023350	no|up	no|down
GENE_025970	yes|up	yes|down
GENE_025978	no|up	no|down
GENE_022809	no|down	no|up
GENE_001025	no|up	no|up
GENE_005012	no|up	no|down
GENE_020132	no|up	no|down
GENE_017064	yes|down	no|down
GENE_014864	yes|up	no|up
GENE_013588	no|down	no|up
GENE_000195	yes|up	no|down
GENE_009842	no|up	no|down
GENE_007528	no|down	no|down
GENE_007664	no|down	no|up
GENE_004138	no|down	no|down
GENE_011798	no|up	no|down
GENE_003174	yes|down	no|down
GENE_012713	no|down	no|down
GENE_003317	no|up	no|up
GENE_020093	yes|down	no|down
GENE_020095	no|down	no|down
GENE_005321	no|down	no|up
GENE_022438	no|down	yes|up
GENE_012200	no|down	no|up
GENE_001035	yes|down	no|down
GENE_005791	no|down	no|no test
GENE_006201	no|up	no|down
GENE_016725	no|down	no|down
GENE_007337	no|down	no|down
GENE_017411	no|up	no|down
GENE_000784	yes|down	no|down
GENE_000781	no|down	no|no test
GENE_013774	no|down	no|up
GENE_001561	no|down	no|down
GENE_014017	no|down	no|up
GENE_012547	no|up	no|down
GENE_012546	no|down	no|up
GENE_012942	no|down	no|up
GENE_012095	no|down	no|up
GENE_005832	no|up	no|down
GENE_021266	no|down	no|down
GENE_012361	no|down	no|up
GENE_001795	no|up	no|down
GENE_024969	no|down	no|down
GENE_007805	no|down	no|down
GENE_010582	no|down	no|down
GENE_021466	no|down	no|down
GENE_023107	no|up	no|down
GENE_025761	no|up	no|up
GENE_022982	no|up	no|up
GENE_016646	no|down	no|up
GENE_007503	no|down	no|down
GENE_011058	no|up	no|down
GENE_015355	no|down	no|down
GENE_015003	yes|up	no|down
GENE_004687	no|up	no|up
GENE_018587	no|down	no|down
GENE_004618	no|up	no|down
GENE_007339	yes|up	no|down
GENE_001784	no|down	no|down
GENE_020870	no|down	yes|down
GENE_018821	yes|up	no|up
GENE_000787	no|down	no|down
GENE_000783	no|down	no|up
GENE_004040	no|up	no|up
GENE_001564	no|down	no|up
GENE_025750	no|up	no|up
GENE_001869	no|down	no|down
GENE_022468	no|up	no|up
GENE_012093	no|down	no|up
GENE_012768	no|down	no|down
GENE_011688	no|up	no|down
GENE_004698	no|down	no|down
GENE_016934	yes|up	no|up
GENE_003267	no|up	no|up
GENE_002056	no|down	no|up
GENE_001791	no|up	no|down
GENE_001978	no|down	no|down
GENE_005277	no|down	no|down
GENE_019672	no|down	no|up
GENE_013716	no|down	no|up
GENE_019511	no|up	no|down
GENE_009332	no|down	no|up
GENE_025765	no|down	no|up
GENE_022789	yes|up	no|up
GENE_008794	yes|down	no|down
GENE_007506	no|down	no|up
GENE_000221	no|no test	no|down
GENE_020505	no|down	no|down
GENE_014718	no|up	no|up
GENE_015622	no|down	no|down
GENE_023525	yes|up	no|down
GENE_001038	yes|down	no|down
GENE_020874	no|up	no|up
GENE_000966	no|up	yes|down
GENE_013598	no|down	no|up
GENE_009854	yes|up	no|up
GENE_025026	yes|up	no|down
GENE_025204	yes|up	no|down
GENE_014497	no|down	no|down
GENE_014496	no|down	no|down
GENE_009254	yes|up	no|up
GENE_004006	no|up	no|down
GENE_003098	no|up	no|down
GENE_026121	no|down	no|down
GENE_000775	no|up	no|down
GENE_000518	no|down	no|down
GENE_023327	no|up	no|down
GENE_005864	no|down	no|up
GENE_021786	no|down	no|down
GENE_014739	no|up	no|down
GENE_019088	no|up	no|down
GENE_012771	no|down	no|down
GENE_014735	no|down	no|down
GENE_019085	no|down	no|up
GENE_024362	no|down	no|up
GENE_002204	no|up	no|up
GENE_007646	yes|down	no|up
GENE_009153	no|up	no|up
GENE_003887	yes|up	no|down
GENE_017282	yes|up	no|up
GENE_012082	no|up	no|down
GENE_005005	no|up	no|up
GENE_020120	no|up	no|down
GENE_010693	yes|down	no|down
GENE_000762	no|up	no|down
GENE_018056	no|down	no|down
GENE_018052	no|up	no|down
GENE_021419	no|down	no|up
GENE_017615	no|up	no|down
GENE_005858	no|up	no|down
GENE_015297	no|up	no|up
GENE_001634	no|down	no|down
GENE_008160	no|down	no|down
GENE_020114	no|up	no|up
GENE_024949	no|up	no|down
GENE_024942	no|up	no|up
GENE_016527	no|up	yes|down
GENE_021888	no|down	no|up
GENE_000755	no|up	no|down
GENE_019651	no|down	no|up
GENE_021071	no|up	no|up
GENE_011183	no|down	no|down
GENE_003695	no|down	no|down
GENE_015025	no|up	no|down
GENE_003531	no|up	no|up
GENE_015372	no|up	yes|down
GENE_024433	no|down	no|down
GENE_020322	no|up	no|up
GENE_015407	no|down	no|down
GENE_026177	no|up	no|up
GENE_001921	no|down	no|down
GENE_004089	no|up	yes|up
GENE_017639	no|up	no|up
GENE_014233	no|down	no|up
GENE_017921	no|up	no|up
GENE_025412	no|down	no|down
GENE_006130	no|down	no|down
GENE_022420	no|down	no|down
GENE_023646	yes|down	no|up
GENE_006565	no|down	no|down
GENE_002337	no|down	no|up
GENE_015323	no|down	no|down
GENE_026166	yes|down	no|up
GENE_022198	no|up	no|down
GENE_024922	no|down	no|down
GENE_005542	no|down	no|down
GENE_005545	yes|up	no|down
GENE_001938	yes|down	no|down
GENE_020912	yes|down	no|down
GENE_018794	no|down	no|down
GENE_025626	no|down	no|down
GENE_007811	no|up	no|down
GENE_020841	no|down	no|up
GENE_023925	yes|down	no|down
GENE_024328	no|down	no|up
GENE_025982	no|down	yes|down
GENE_015425	no|down	no|up
GENE_021161	no|up	no|down
GENE_023453	no|up	no|down
GENE_016036	no|up	yes|down
GENE_001410	no|down	no|up
GENE_008175	no|down	no|down
GENE_002068	no|down	no|up
GENE_001908	no|down	no|down
GENE_006009	no|up	no|up
GENE_013758	no|down	no|down
GENE_010594	no|down	no|down
GENE_009155	no|up	no|down
GENE_024136	no|down	no|down
GENE_005830	no|up	no|down
GENE_012746	no|up	no|down
GENE_002077	no|down	no|down
GENE_016714	yes|up	no|down
GENE_016469	yes|up	no|up
GENE_017441	no|up	no|up
GENE_018968	no|up	no|up
GENE_000530	no|down	no|up
GENE_008034	no|up	no|down
GENE_015994	no|down	no|up
GENE_000245	no|down	no|down
GENE_022457	no|down	no|down
GENE_009175	no|up	no|down
GENE_019138	no|up	no|down
GENE_005734	yes|up	no|down
GENE_019489	no|down	no|up
GENE_018461	no|up	no|down
GENE_013489	no|down	no|up
GENE_013482	no|down	no|up
GENE_016986	yes|down	no|down
GENE_001922	no|up	no|down
GENE_001927	no|no test	no|down
GENE_000528	no|down	no|down
GENE_006629	no|down	no|up
GENE_006626	no|down	no|down
GENE_022845	no|up	no|down
GENE_013498	no|down	no|down
GENE_017424	no|down	no|up
GENE_018796	yes|down	no|down
GENE_009807	no|down	no|down
GENE_009594	no|down	no|up
GENE_007602	no|down	no|down
GENE_015874	no|down	no|up
GENE_025456	no|up	no|down
GENE_025454	no|up	no|down
GENE_006633	yes|down	no|down
GENE_001806	no|up	no|up
GENE_002392	no|up	no|down
GENE_021162	no|down	no|up
GENE_005735	no|up	no|down
GENE_022983	no|down	no|down
GENE_023580	no|down	no|down
GENE_000722	no|down	no|up
GENE_004171	no|up	no|down
GENE_007553	no|down	no|down
GENE_021754	no|up	no|down
GENE_005898	no|down	no|down
GENE_010887	no|down	no|up
GENE_002884	yes|down	no|up
GENE_012525	no|down	no|up
GENE_007015	yes|up	no|down
GENE_023669	no|down	no|up
GENE_005702	no|up	no|up
GENE_020157	no|down	no|down
GENE_024908	yes|up	no|down
GENE_013474	no|up	yes|up
GENE_005867	no|up	no|up
GENE_005860	no|down	no|down
GENE_003153	yes|down	no|down
GENE_009151	no|down	no|up
GENE_005868	no|down	no|down
GENE_001878	no|down	no|down
GENE_022817	no|down	no|up
GENE_001901	no|up	no|down
GENE_002841	no|down	no|down
GENE_024956	no|down	no|down
GENE_021890	no|down	no|up
GENE_019649	no|up	no|down
GENE_013246	no|down	no|up
GENE_002618	no|down	no|down
GENE_001588	no|up	no|up
GENE_014929	no|down	no|up
GENE_010911	yes|up	no|down
GENE_012967	no|down	no|down
GENE_022442	no|down	no|down
GENE_024137	no|up	no|up
GENE_007184	no|down	no|up
GENE_021243	no|down	no|down
GENE_002076	no|down	no|down
GENE_024945	no|up	no|down
GENE_013037	no|down	no|up
GENE_013748	no|down	no|up
GENE_000538	no|down	no|up
GENE_013923	no|down	no|down
GENE_020931	no|down	no|up
GENE_020689	no|down	no|down
GENE_002819	no|up	no|down
GENE_000656	yes|down	no|down
GENE_018265	no|down	no|down
GENE_011074	no|down	no|down
GENE_014024	no|down	no|up
GENE_023300	no|down	no|down
GENE_023655	no|down	no|down
GENE_024434	no|down	no|up
GENE_013350	no|up	no|down
GENE_020321	no|no test	no|up
GENE_019131	yes|down	no|down
GENE_012358	no|down	no|up
GENE_012757	no|up	no|up
GENE_004711	no|up	no|down
GENE_004712	no|down	no|down
GENE_005064	no|up	no|down
GENE_002003	yes|up	no|up
GENE_026176	no|up	no|up
GENE_001619	no|down	no|up
GENE_017900	yes|down	no|down
GENE_002871	no|up	no|down
GENE_009360	no|up	no|down
GENE_000259	no|up	no|down
GENE_015367	no|down	yes|down
GENE_009581	no|down	no|down
GENE_009105	no|down	no|down
GENE_008020	no|down	no|down
GENE_025421	yes|down	no|down
GENE_012503	no|down	no|down
GENE_006562	no|up	no|up
GENE_013099	yes|up	no|up
GENE_024924	yes|up	no|down
GENE_010082	no|up	no|down
GENE_013019	no|up	no|up
GENE_013016	no|down	no|down
GENE_023328	no|down	no|down
GENE_024098	no|up	no|down
GENE_024093	no|up	no|down
GENE_006594	no|down	no|down
GENE_018598	no|up	no|up
GENE_003031	yes|down	no|down
GENE_009207	no|down	no|up
GENE_002671	yes|up	no|up
GENE_019642	yes|up	no|up
GENE_013024	no|down	no|up
GENE_017610	no|up	no|down
GENE_010375	no|up	no|down
GENE_008783	no|up	no|down
GENE_019094	no|up	no|up
GENE_005857	no|down	no|down
GENE_017842	no|up	no|down
GENE_025403	no|down	no|down
GENE_004725	yes|down	no|down
GENE_017671	yes|down	no|up
GENE_020112	no|up	no|down
GENE_013744	yes|up	no|up
GENE_001596	no|up	no|down
GENE_018044	no|down	no|up
GENE_002863	no|down	no|up
GENE_024303	yes|up	no|down
GENE_024123	no|down	no|up
GENE_008998	no|down	no|up
GENE_012356	no|down	no|down
GENE_008990	no|down	no|down
GENE_006576	no|up	no|down
GENE_023474	no|down	no|up
GENE_007376	yes|down	no|down
GENE_022878	no|up	yes|up
GENE_009158	no|up	no|up
GENE_017584	no|down	no|up
GENE_016502	yes|up	no|up
GENE_001926	no|down	no|down
GENE_014904	no|down	no|down
GENE_005862	no|down	no|down
GENE_020690	no|down	no|down
GENE_022759	no|up	no|up
GENE_009582	no|up	no|up
GENE_002670	no|down	no|up
GENE_004528	no|up	no|down
GENE_002065	no|up	no|down
GENE_006563	no|down	yes|up
GENE_004705	no|up	no|down
GENE_002060	no|up	no|up
GENE_002012	no|down	no|down
GENE_007380	no|down	no|up
GENE_003030	no|up	no|up
GENE_005916	no|up	no|down
GENE_007355	no|down	no|down
GENE_008774	no|down	no|up
GENE_013029	no|down	no|up
GENE_024920	no|up	no|down
GENE_000183	no|up	no|down
GENE_021061	no|down	no|up
GENE_002446	no|up	no|down
GENE_017932	no|up	no|up
GENE_018276	no|down	no|down
GENE_011069	no|down	yes|down
GENE_004097	no|up	no|down
GENE_015611	no|down	no|down
GENE_009378	yes|up	no|down
GENE_001425	no|down	no|down
GENE_014747	no|up	no|down
GENE_000357	no|down	no|down
GENE_007549	no|down	no|down
GENE_015314	no|down	no|down
GENE_025406	no|down	no|down
GENE_004553	no|down	no|down
GENE_020330	no|down	no|up
GENE_022437	no|up	no|up
GENE_006588	no|up	no|up
GENE_022116	no|down	no|up
GENE_002398	no|down	no|down
GENE_004726	no|up	no|up
GENE_005078	no|down	no|up
GENE_025852	yes|up	yes|down
GENE_000753	no|down	no|down
GENE_004771	no|up	no|down
GENE_013928	no|up	no|up
GENE_023459	no|up	no|down
GENE_024918	no|up	no|up
GENE_013253	no|up	no|down
GENE_020128	no|down	no|down
GENE_013717	no|up	no|down
GENE_000228	no|down	no|up
GENE_011072	no|down	no|down
GENE_011054	no|down	no|down
GENE_014751	no|down	no|down
GENE_009078	no|down	no|down
GENE_005062	no|down	no|up
GENE_010314	no|down	yes|up
GENE_017810	no|down	no|down
GENE_017909	no|down	no|up
GENE_003388	no|up	no|down
GENE_010682	no|up	no|down
GENE_017638	no|down	no|down
GENE_017635	no|down	no|down
GENE_014908	no|down	no|down
GENE_015987	no|up	no|down
GENE_022205	no|down	no|no test
GENE_015189	no|down	no|up
GENE_006801	yes|down	no|down
GENE_010060	no|down	no|down
GENE_009101	no|down	no|up
GENE_024115	yes|down	no|up
GENE_024440	no|up	no|up
GENE_006627	no|up	no|down
GENE_008176	no|up	no|down
GENE_007807	no|down	no|up
GENE_020171	no|down	no|up
GENE_022197	yes|up	no|up
GENE_005314	no|down	no|up
GENE_006384	no|down	no|up
GENE_001289	no|down	no|down
GENE_009371	yes|down	no|down
GENE_000485	no|up	no|down
GENE_021988	no|up	no|up
GENE_007604	no|down	no|down
GENE_007605	no|down	no|down
GENE_020342	yes|down	no|down
GENE_018884	no|up	no|down
GENE_018886	no|down	no|up
GENE_013460	no|down	no|down
GENE_025443	no|up	no|up
GENE_012080	no|up	no|up
GENE_016708	no|up	no|down
GENE_016258	no|down	no|up
GENE_001128	no|down	no|down
GENE_011395	no|up	no|no test
GENE_000763	no|down	no|down
GENE_000766	no|down	no|down
GENE_001583	no|down	no|up
GENE_014921	yes|up	no|up
GENE_010042	yes|up	no|down
GENE_007050	no|down	no|down
GENE_009839	no|down	no|up
GENE_014035	no|down	no|down
GENE_015344	no|down	no|down
GENE_022443	yes|down	no|down
GENE_012341	no|down	no|up
GENE_000752	no|up	no|down
GENE_011317	no|down	no|up
GENE_013479	no|up	no|down
GENE_020305	no|up	no|down
GENE_022855	yes|down	no|up
GENE_006014	no|down	no|down
GENE_006965	no|down	no|down
GENE_012375	no|down	no|down
GENE_000535	no|down	no|down
GENE_006597	no|up	no|up
GENE_016703	no|up	no|down
GENE_017625	no|down	no|down
GENE_018025	no|down	no|down
GENE_021409	no|up	no|down
GENE_021465	no|down	no|up
GENE_000247	no|down	no|up
GENE_004491	no|up	no|up
GENE_003534	no|down	no|down
GENE_000767	no|up	no|down
GENE_004539	no|down	no|up
GENE_013023	no|up	no|up
GENE_003747	no|up	no|down
GENE_022451	yes|down	no|down
GENE_013243	no|down	no|down
GENE_022268	no|up	no|down
GENE_019130	yes|down	no|down
GENE_000238	no|up	no|up
GENE_024317	yes|up	no|up
GENE_008992	no|down	no|up
GENE_018871	yes|up	no|up
GENE_006572	no|down	yes|up
GENE_018755	no|up	no|down
GENE_002268	no|up	no|down
GENE_016246	no|down	no|up
GENE_022861	no|down	no|down
GENE_004710	yes|down	no|down
GENE_001914	no|up	no|up
GENE_009765	yes|up	no|up
GENE_005295	no|up	no|down
GENE_014648	no|up	no|down
GENE_015369	no|down	no|up
GENE_011826	yes|up	no|up
GENE_010210	yes|down	no|down
GENE_011332	no|up	no|up
GENE_014026	no|down	no|down
GENE_005841	no|down	yes|down
GENE_003279	no|down	no|no test
GENE_006578	yes|up	no|down
GENE_010228	yes|up	no|down
GENE_003277	no|down	no|down
GENE_016272	no|down	no|up
GENE_020101	no|down	no|up
GENE_006561	no|up	no|up
GENE_000474	no|up	no|down
GENE_002485	no|up	no|down
GENE_002015	no|down	no|down
GENE_020264	no|up	no|down
GENE_000740	no|up	no|down
GENE_023462	yes|up	no|up
GENE_001924	no|down	no|up
GENE_007387	no|up	no|up
GENE_020698	yes|up	no|up
GENE_023325	no|up	no|up
GENE_020174	no|down	no|down
GENE_016572	no|down	no|up
GENE_006808	yes|up	no|up
GENE_002119	yes|down	no|up
GENE_007576	no|down	no|up
GENE_009814	no|up	no|down
GENE_017931	no|down	no|down
GENE_023644	no|down	no|up
GENE_021424	no|down	no|down
GENE_018893	no|down	no|up
GENE_022992	no|down	no|up
GENE_014915	no|up	no|down
GENE_018606	no|down	no|down
GENE_006915	no|up	no|down
GENE_022841	no|up	no|up
GENE_016198	no|down	no|down
GENE_010891	yes|down	no|up
GENE_002490	no|up	no|up
GENE_022439	no|up	no|down
GENE_016511	no|down	no|up
GENE_001935	no|down	no|down
GENE_019118	no|up	no|down
GENE_013271	no|down	no|up
GENE_000084	yes|down	no|no test
GENE_003268	no|down	no|down
GENE_016973	no|down	no|down
GENE_025621	no|down	no|down
GENE_015426	no|down	no|down
GENE_004147	no|down	no|down
GENE_006556	no|up	no|down
GENE_000268	no|down	yes|down
GENE_006819	no|down	no|down
GENE_023100	yes|down	yes|up
GENE_010096	no|down	no|down
GENE_004558	no|up	no|down
GENE_023455	no|down	no|down
GENE_004557	no|down	no|down
GENE_010890	no|down	no|up
GENE_022188	no|down	no|down
GENE_025455	yes|up	no|down
GENE_017034	no|up	no|up
GENE_002814	no|down	no|up
GENE_002812	no|down	no|down
GENE_022223	no|up	no|up
GENE_010267	no|down	no|down
GENE_011130	no|down	yes|up
GENE_009740	no|down	no|down
GENE_023938	no|up	no|down
GENE_013891	no|up	no|up
GENE_003882	no|up	no|down
GENE_020535	no|down	no|up
GENE_014616	no|up	no|down
GENE_024097	no|down	no|down
GENE_002680	no|down	no|down
GENE_004734	no|up	no|up
GENE_005480	no|up	no|down
GENE_016296	yes|up	no|down
GENE_024915	no|up	no|up
GENE_006008	no|up	no|down
GENE_013248	no|down	no|up
GENE_017614	no|up	no|up
GENE_017611	no|down	no|up
GENE_020395	no|up	no|up
GENE_000188	no|up	no|up
GENE_012589	yes|down	no|up
GENE_022497	no|down	yes|up
GENE_011061	no|down	yes|down
GENE_003526	no|down	no|down
GENE_012902	no|down	no|up
GENE_012272	no|up	no|down
GENE_024130	no|down	no|up
GENE_002697	no|down	no|up
GENE_005072	no|down	no|down
GENE_002073	no|down	no|down
GENE_007369	no|down	no|down
GENE_008854	no|down	no|down
GENE_021889	no|up	no|down
GENE_001595	no|up	no|down
GENE_020939	no|down	no|down
GENE_010696	no|up	no|up
GENE_010699	no|down	no|down
GENE_022422	no|up	no|up
GENE_007502	no|up	no|down
GENE_011301	yes|up	no|up
GENE_002761	no|down	no|up
[truncated: 10,438 more rows]

## Sheet: Supplementary table S2 GO
Supplementary table S2: Gene Ontology classification of the identified DEGs.
1. DA P.m 1DPI vs DA CK 1DPI
GO ID	Description	Term Type	DA P.m 1DPI vs DA CK 1DPI num	DA P.m 1DPI vs DA CK 1DPI percent	DA P.m 1DPI vs DA CK 1DPI Gene_ids
GO:0002757	immune response-activating signaling pathway	biological_process	1	1/ 1111	GENE_009661
GO:0002218	activation of innate immune response	biological_process	1	1/ 1111	GENE_009661
GO:0030641	regulation of cellular pH	biological_process	2	2/ 1111	GENE_022471;GENE_001084
GO:0019222	regulation of metabolic process	biological_process	52	52/ 1111	GENE_000908;GENE_011247;GENE_012300;GENE_013377;GENE_011261;GENE_019962;GENE_010708;GENE_003563;GENE_024907;GENE_008936;GENE_001633;GENE_002701;GENE_001307;GENE_014726;GENE_017331;GENE_011327;GENE_021460;GENE_007000;GENE_004015;GENE_022175;GENE_011936;GENE_008717;GENE_018345;GENE_010751;GENE_014310;GENE_011254;GENE_026218;GENE_024790;GENE_011468;GENE_020903;GENE_005336;GENE_001046;GENE_010693;GEN…
GO:0048583	regulation of response to stimulus	biological_process	11	11/ 1111	GENE_010713;GENE_025552;GENE_009661;GENE_016920;GENE_011075;GENE_025282;GENE_025302;GENE_007132;GENE_013815;GENE_025354;GENE_024749
GO:0050793	regulation of developmental process	biological_process	7	7/ 1111	GENE_012605;GENE_020591;GENE_003318;GENE_004193;GENE_008119;GENE_015671;GENE_009077
GO:0050794	regulation of cellular process	biological_process	120	120/ 1111	GENE_011247;GENE_014344;GENE_013753;GENE_013377;GENE_010843;GENE_024907;GENE_002720;GENE_013334;GENE_015451;GENE_001633;GENE_001307;GENE_004015;GENE_019318;GENE_010966;GENE_017331;GENE_007132;GENE_025148;GENE_025552;GENE_020903;GENE_014047;GENE_001708;GENE_018852;GENE_010708;GENE_003344;GENE_016782;GENE_000816;GENE_016920;GENE_016627;GENE_016846;GENE_003745;GENE_015671;GENE_001714;GENE_009478;GEN…
GO:0032879	regulation of localization	biological_process	4	4/ 1111	GENE_007720;GENE_008025;GENE_002156;GENE_013809
GO:0051239	regulation of multicellular organismal process	biological_process	1	1/ 1111	GENE_020591
GO:0002682	regulation of immune system process	biological_process	1	1/ 1111	GENE_009661
GO:0048518	positive regulation of biological process	biological_process	16	16/ 1111	GENE_021460;GENE_024790;GENE_015131;GENE_004193;GENE_020591;GENE_003746;GENE_006621;GENE_014726;GENE_011936;GENE_009661;GENE_011254;GENE_001633;GENE_015671;GENE_001307;GENE_001148;GENE_013377
GO:0048519	negative regulation of biological process	biological_process	16	16/ 1111	GENE_026218;GENE_018406;GENE_000375;GENE_011327;GENE_018744;GENE_012300;GENE_008025;GENE_021460;GENE_004193;GENE_011247;GENE_012171;GENE_016920;GENE_011261;GENE_010257;GENE_002156;GENE_011254
GO:0023051	regulation of signaling	biological_process	5	5/ 1111	GENE_025552;GENE_016920;GENE_024749;GENE_007132;GENE_013815
GO:0040008	regulation of growth	biological_process	5	5/ 1111	GENE_020591;GENE_003746;GENE_001148;GENE_004193;GENE_022743
GO:0051453	regulation of intracellular pH	biological_process	2	2/ 1111	GENE_022471;GENE_001084
GO:0008360	regulation of cell shape	biological_process	2	2/ 1111	GENE_008119;GENE_003318
GO:0010817	regulation of hormone levels	biological_process	10	10/ 1111	GENE_001136;GENE_011726;GENE_021565;GENE_017917;GENE_013377;GENE_001329;GENE_013809;GENE_007132;GENE_025639;GENE_024749
GO:0031647	regulation of protein stability	biological_process	2	2/ 1111	GENE_005336;GENE_021378
GO:1901564	organonitrogen compound metabolic process	biological_process	88	88/ 1111	GENE_001136;GENE_022807;GENE_005559;GENE_018821;GENE_005552;GENE_018829;GENE_012961;GENE_004014;GENE_017231;GENE_004156;GENE_020226;GENE_021156;GENE_024317;GENE_013203;GENE_012172;GENE_001708;GENE_025241;GENE_000656;GENE_019542;GENE_003180;GENE_022120;GENE_021000;GENE_021451;GENE_020989;GENE_011713;GENE_018257;GENE_001427;GENE_003031;GENE_010372;GENE_016840;GENE_023418;GENE_013845;GENE_021736;GEN…
GO:0034641	cellular nitrogen compound metabolic process	biological_process	85	85/ 1111	GENE_022807;GENE_011691;GENE_024458;GENE_024459;GENE_013722;GENE_001084;GENE_017618;GENE_007708;GENE_013845;GENE_015743;GENE_019962;GENE_010843;GENE_003984;GENE_008936;GENE_011668;GENE_001087;GENE_009186;GENE_025569;GENE_007423;GENE_020056;GENE_002282;GENE_012961;GENE_021460;GENE_018516;GENE_010553;GENE_009325;GENE_010418;GENE_011254;GENE_018532;GENE_023647;GENE_011638;GENE_016542;GENE_021544;GEN…
GO:0043603	amide metabolic process	biological_process	9	9/ 1111	GENE_022588;GENE_011668;GENE_003031;GENE_020056;GENE_016840;GENE_015743;GENE_003180;GENE_025569;GENE_010353
GO:0044255	cellular lipid metabolic process	biological_process	27	27/ 1111	GENE_010625;GENE_002658;GENE_002577;GENE_008468;GENE_020698;GENE_005320;GENE_011668;GENE_020829;GENE_021693;GENE_010188;GENE_021869;GENE_000868;GENE_024115;GENE_025995;GENE_023370;GENE_002136;GENE_009378;GENE_024831;GENE_007022;GENE_005883;GENE_020353;GENE_014848;GENE_010565;GENE_024487;GENE_015875;GENE_017599;GENE_021164
GO:0015979	photosynthesis	biological_process	1	1/ 1111	GENE_005336
GO:0006091	generation of precursor metabolites and energy	biological_process	14	14/ 1111	GENE_008936;GENE_015056;GENE_010418;GENE_005336;GENE_010884;GENE_002442;GENE_010852;GENE_018796;GENE_000815;GENE_004918;GENE_009186;GENE_000507;GENE_001933;GENE_009371
GO:0043446	cellular alkane metabolic process	biological_process	1	1/ 1111	GENE_002658
GO:0006730	one-carbon metabolic process	biological_process	1	1/ 1111	GENE_006476
GO:0042180	cellular ketone metabolic process	biological_process	2	2/ 1111	GENE_004346;GENE_002442
GO:0046483	heterocycle metabolic process	biological_process	79	79/ 1111	GENE_001136;GENE_013722;GENE_011691;GENE_017917;GENE_024459;GENE_001084;GENE_017618;GENE_007708;GENE_013845;GENE_019962;GENE_010843;GENE_003984;GENE_008936;GENE_001087;GENE_009186;GENE_001307;GENE_007423;GENE_002282;GENE_012961;GENE_021460;GENE_018516;GENE_010553;GENE_009325;GENE_010418;GENE_011254;GENE_018532;GENE_023647;GENE_011638;GENE_016542;GENE_021544;GENE_017331;GENE_013754;GENE_005871;GEN…
GO:0072593	reactive oxygen species metabolic process	biological_process	10	10/ 1111	GENE_013346;GENE_005863;GENE_007898;GENE_006836;GENE_005876;GENE_022562;GENE_002194;GENE_007708;GENE_018835;GENE_022443
GO:0006790	sulfur compound metabolic process	biological_process	6	6/ 1111	GENE_001675;GENE_023357;GENE_022482;GENE_005552;GENE_006476;GENE_003180
GO:0006793	phosphorus metabolic process	biological_process	111	111/ 1111	GENE_021662;GENE_020698;GENE_011007;GENE_014344;GENE_023125;GENE_021580;GENE_019318;GENE_010966;GENE_009552;GENE_025148;GENE_017553;GENE_001786;GENE_014040;GENE_019696;GENE_018852;GENE_000656;GENE_025401;GENE_011656;GENE_019994;GENE_019226;GENE_010372;GENE_009765;GENE_002458;GENE_003745;GENE_013845;GENE_016952;GENE_001494;GENE_009186;GENE_005369;GENE_017708;GENE_010418;GENE_002595;GENE_022743;GEN…
GO:0009404	toxin metabolic process	biological_process	2	2/ 1111	GENE_003180;GENE_009413
GO:0006081	cellular aldehyde metabolic process	biological_process	4	4/ 1111	GENE_011568;GENE_023946;GENE_024728;GENE_018094
GO:0006082	organic acid metabolic process	biological_process	34	34/ 1111	GENE_002658;GENE_002577;GENE_008468;GENE_005320;GENE_022482;GENE_005552;GENE_020584;GENE_004918;GENE_024317;GENE_011568;GENE_010188;GENE_021869;GENE_000868;GENE_024115;GENE_023357;GENE_006371;GENE_009378;GENE_024831;GENE_015663;GENE_005883;GENE_020353;GENE_003180;GENE_021000;GENE_014848;GENE_013013;GENE_020989;GENE_024487;GENE_003873;GENE_003031;GENE_023946;GENE_015875;GENE_014530;GENE_016840;GEN…
GO:0044248	cellular catabolic process	biological_process	28	28/ 1111	GENE_007927;GENE_007898;GENE_006836;GENE_007022;GENE_022562;GENE_024728;GENE_000267;GENE_018744;GENE_021693;GENE_008630;GENE_005876;GENE_002194;GENE_009413;GENE_024317;GENE_022443;GENE_002119;GENE_013346;GENE_021869;GENE_005863;GENE_007708;GENE_015663;GENE_008560;GENE_002174;GENE_018406;GENE_003873;GENE_010372;GENE_018835;GENE_015875
GO:0044249	cellular biosynthetic process	biological_process	79	79/ 1111	GENE_009058;GENE_010625;GENE_002658;GENE_011691;GENE_024458;GENE_002577;GENE_010988;GENE_008468;GENE_013377;GENE_022807;GENE_016602;GENE_010843;GENE_003984;GENE_022482;GENE_005883;GENE_005552;GENE_004346;GENE_007423;GENE_006544;GENE_020056;GENE_012961;GENE_000960;GENE_021164;GENE_009325;GENE_011668;GENE_020353;GENE_020584;GENE_023647;GENE_013744;GENE_022588;GENE_017331;GENE_025281;GENE_024317;GEN…
GO:0009850	auxin metabolic process	biological_process	3	3/ 1111	GENE_011726;GENE_021565;GENE_013377
GO:0006725	cellular aromatic compound metabolic process	biological_process	88	88/ 1111	GENE_001136;GENE_000084;GENE_010843;GENE_019542;GENE_001307;GENE_002282;GENE_012961;GENE_018532;GENE_017331;GENE_013894;GENE_002119;GENE_016321;GENE_010490;GENE_025639;GENE_012171;GENE_000656;GENE_018981;GENE_017798;GENE_008560;GENE_003180;GENE_010372;GENE_016627;GENE_016840;GENE_009382;GENE_016846;GENE_019385;GENE_013845;GENE_003984;GENE_009186;GENE_000267;GENE_018516;GENE_010553;GENE_010418;GEN…
GO:0006575	cellular modified amino acid metabolic process	biological_process	3	3/ 1111	GENE_003031;GENE_016840;GENE_003180
GO:0044550	secondary metabolite biosynthetic process	biological_process	5	5/ 1111	GENE_000900;GENE_005907;GENE_020577;GENE_003180;GENE_006544
GO:0044283	small molecule biosynthetic process	biological_process	24	24/ 1111	GENE_002658;GENE_002577;GENE_008468;GENE_022482;GENE_005552;GENE_004346;GENE_020584;GENE_010188;GENE_001106;GENE_000868;GENE_024115;GENE_018874;GENE_023357;GENE_006371;GENE_009378;GENE_024831;GENE_015663;GENE_005883;GENE_020353;GENE_013013;GENE_023946;GENE_016840;GENE_002442;GENE_021164
GO:0042446	hormone biosynthetic process	biological_process	1	1/ 1111	GENE_013377
GO:1901576	organic substance biosynthetic process	biological_process	79	79/ 1111	GENE_009058;GENE_010625;GENE_002658;GENE_011691;GENE_024458;GENE_000900;GENE_010988;GENE_008468;GENE_022807;GENE_016602;GENE_010843;GENE_003984;GENE_022482;GENE_005883;GENE_009186;GENE_005552;GENE_004346;GENE_007423;GENE_006544;GENE_020056;GENE_012961;GENE_000960;GENE_021164;GENE_009325;GENE_011668;GENE_020353;GENE_020584;GENE_023647;GENE_013744;GENE_022588;GENE_002577;GENE_017331;GENE_025281;GEN…
GO:0044282	small molecule catabolic process	biological_process	6	6/ 1111	GENE_021869;GENE_003873;GENE_015663;GENE_015875;GENE_024317;GENE_024728
GO:1901575	organic substance catabolic process	biological_process	64	64/ 1111	GENE_009899;GENE_004918;GENE_010042;GENE_011475;GENE_007927;GENE_009959;GENE_007898;GENE_006836;GENE_025620;GENE_005559;GENE_001071;GENE_018821;GENE_022562;GENE_013346;GENE_024728;GENE_018829;GENE_022134;GENE_000267;GENE_005876;GENE_000544;GENE_008025;GENE_003528;GENE_004156;GENE_008630;GENE_024257;GENE_002194;GENE_012209;GENE_024317;GENE_025165;GENE_013918;GENE_022443;GENE_002119;GENE_009878;GEN…
GO:0046292	formaldehyde metabolic process	biological_process	1	1/ 1111	GENE_024728
GO:0006766	vitamin metabolic process	biological_process	4	4/ 1111	GENE_023946;GENE_016840;GENE_004346;GENE_018874
GO:0005996	monosaccharide metabolic process	biological_process	3	3/ 1111	GENE_008936;GENE_010418;GENE_013190
GO:0006066	alcohol metabolic process	biological_process	2	2/ 1111	GENE_014848;GENE_001106
GO:0055086	nucleobase-containing small molecule metabolic process	biological_process	8	8/ 1111	GENE_008936;GENE_010418;GENE_005336;GENE_013845;GENE_010372;GENE_000656;GENE_009186;GENE_001084
GO:0006629	lipid metabolic process	biological_process	49	49/ 1111	GENE_009899;GENE_010625;GENE_002658;GENE_003528;GENE_002577;GENE_009959;GENE_009878;GENE_020698;GENE_005320;GENE_002410;GENE_002413;GENE_002156;GENE_011668;GENE_020353;GENE_008025;GENE_007038;GENE_017928;GENE_024332;GENE_006160;GENE_008468;GENE_025281;GENE_022462;GENE_021693;GENE_020386;GENE_010188;GENE_021869;GENE_020829;GENE_000868;GENE_024115;GENE_025995;GENE_023370;GENE_002136;GENE_009378;GEN…
GO:0006139	nucleobase-containing compound metabolic process	biological_process	69	69/ 1111	GENE_013722;GENE_011691;GENE_024458;GENE_024459;GENE_001084;GENE_010988;GENE_007708;GENE_013845;GENE_019962;GENE_010843;GENE_003984;GENE_008936;GENE_001087;GENE_009186;GENE_001307;GENE_007423;GENE_002282;GENE_021460;GENE_018516;GENE_010553;GENE_009325;GENE_010418;GENE_011254;GENE_018532;GENE_023647;GENE_016542;GENE_021544;GENE_017331;GENE_013754;GENE_005871;GENE_004725;GENE_013894;GENE_004651;GEN…
GO:0006099	tricarboxylic acid cycle	biological_process	3	3/ 1111	GENE_011568;GENE_000044;GENE_012085
GO:0005975	carbohydrate metabolic process	biological_process	50	50/ 1111	GENE_009589;GENE_011265;GENE_013190;GENE_013534;GENE_025620;GENE_001071;GENE_008532;GENE_022451;GENE_009186;GENE_018829;GENE_007817;GENE_022134;GENE_025681;GENE_010418;GENE_011475;GENE_018105;GENE_009661;GENE_024257;GENE_005157;GENE_018821;GENE_012417;GENE_004918;GENE_002276;GENE_005667;GENE_025288;GENE_011568;GENE_008936;GENE_000507;GENE_025204;GENE_018155;GENE_012209;GENE_025326;GENE_017989;GEN…
GO:0019538	protein metabolic process	biological_process	47	47/ 1111	GENE_023418;GENE_011826;GENE_010042;GENE_011713;GENE_021736;GENE_012585;GENE_023454;GENE_004130;GENE_025569;GENE_012026;GENE_004014;GENE_016671;GENE_017231;GENE_016542;GENE_021110;GENE_022588;GENE_020226;GENE_021275;GENE_021156;GENE_016177;GENE_013671;GENE_024317;GENE_012907;GENE_008084;GENE_015743;GENE_013203;GENE_001106;GENE_015465;GENE_006685;GENE_001708;GENE_024275;GENE_019542;GENE_006986;GEN…
GO:0006520	amino acid metabolic process	biological_process	13	13/ 1111	GENE_021000;GENE_023946;GENE_020584;GENE_020989;GENE_023357;GENE_003873;GENE_006371;GENE_015663;GENE_022482;GENE_014530;GENE_024317;GENE_005552;GENE_016840
GO:0019637	organophosphate metabolic process	biological_process	11	11/ 1111	GENE_020698;GENE_008936;GENE_010418;GENE_005336;GENE_013845;GENE_023370;GENE_023946;GENE_010372;GENE_000656;GENE_009186;GENE_001084
GO:0120252	hydrocarbon metabolic process	biological_process	4	4/ 1111	GENE_002577;GENE_007022;GENE_002658;GENE_021693
GO:0120254	olefinic compound metabolic process	biological_process	1	1/ 1111	GENE_014848
GO:0015977	carbon fixation	biological_process	1	1/ 1111	GENE_000044
GO:1901135	carbohydrate derivative metabolic process	biological_process	15	15/ 1111	GENE_008936;GENE_010418;GENE_001084;GENE_025204;GENE_013845;GENE_001071;GENE_024257;GENE_025241;GENE_018821;GENE_010372;GENE_013427;GENE_009186;GENE_025165;GENE_018829;GENE_003180
GO:1901615	organic hydroxy compound metabolic process	biological_process	3	3/ 1111	GENE_014848;GENE_023946;GENE_001106
GO:1901360	organic cyclic compound metabolic process	biological_process	87	87/ 1111	GENE_000084;GENE_010843;GENE_019542;GENE_001307;GENE_002282;GENE_012961;GENE_018532;GENE_017331;GENE_013894;GENE_002119;GENE_016321;GENE_010490;GENE_014168;GENE_000656;GENE_018981;GENE_017798;GENE_008560;GENE_003180;GENE_014848;GENE_010372;GENE_016627;GENE_016840;GENE_009382;GENE_016846;GENE_019385;GENE_013845;GENE_003984;GENE_009186;GENE_000267;GENE_018516;GENE_010553;GENE_010418;GENE_016542;GEN…
GO:0042743	hydrogen peroxide metabolic process	biological_process	10	10/ 1111	GENE_013346;GENE_005863;GENE_007898;GENE_006836;GENE_005876;GENE_022562;GENE_002194;GENE_007708;GENE_018835;GENE_022443
GO:0043170	macromolecule metabolic process	biological_process	132	132/ 1111	GENE_000084;GENE_010843;GENE_018981;GENE_018821;GENE_001307;GENE_018829;GENE_022134;GENE_002282;GENE_004014;GENE_018532;GENE_017231;GENE_020226;GENE_017331;GENE_021156;GENE_012209;GENE_024317;GENE_013894;GENE_016321;GENE_013203;GENE_010490;GENE_015465;GENE_012171;GENE_001708;GENE_025241;GENE_019542;GENE_017798;GENE_000544;GENE_022120;GENE_021451;GENE_011713;GENE_018257;GENE_001427;GENE_022451;GEN…
GO:0046500	S-adenosylmethionine metabolic process	biological_process	1	1/ 1111	GENE_006476
GO:0006749	glutathione metabolic process	biological_process	9	9/ 1111	GENE_001472;GENE_008623;GENE_008632;GENE_015288;GENE_003031;GENE_009413;GENE_008583;GENE_013986;GENE_003180
GO:0030638	polyketide metabolic process	biological_process	1	1/ 1111	GENE_000900
GO:0009690	cytokinin metabolic process	biological_process	3	3/ 1111	GENE_001136;GENE_025639;GENE_017917
GO:0046148	pigment biosynthetic process	biological_process	2	2/ 1111	GENE_012961;GENE_015266
GO:0042168	heme metabolic process	biological_process	1	1/ 1111	GENE_012961
GO:0009698	phenylpropanoid metabolic process	biological_process	9	9/ 1111	GENE_002119;GENE_020577;GENE_007927;GENE_008630;GENE_006544;GENE_008560;GENE_005907;GENE_000267;GENE_002174
GO:0019757	glycosinolate metabolic process	biological_process	1	1/ 1111	GENE_003180
GO:0055082	intracellular chemical homeostasis	biological_process	6	6/ 1111	GENE_008629;GENE_011331;GENE_009848;GENE_011757;GENE_022471;GENE_001084
GO:0098771	inorganic ion homeostasis	biological_process	3	3/ 1111	GENE_008629;GENE_009848;GENE_011331
GO:0050801	monoatomic ion homeostasis	biological_process	7	7/ 1111	GENE_008629;GENE_016966;GENE_011331;GENE_009848;GENE_011757;GENE_022471;GENE_001084
GO:0140013	meiotic nuclear division	biological_process	1	1/ 1111	GENE_025421
GO:0007143	female meiotic nuclear division	biological_process	1	1/ 1111	GENE_025421
GO:0007140	male meiotic nuclear division	biological_process	1	1/ 1111	GENE_025421
GO:0048653	anther development	biological_process	1	1/ 1111	GENE_025995
GO:0010228	vegetative to reproductive phase transition of meristem	biological_process	1	1/ 1111	GENE_001165
GO:0009793	embryo development ending in seed dormancy	biological_process	1	1/ 1111	GENE_019483
GO:0009835	fruit ripening	biological_process	1	1/ 1111	GENE_008545
GO:0048608	reproductive structure development	biological_process	6	6/ 1111	GENE_019617;GENE_024237;GENE_021274;GENE_024831;GENE_009077;GENE_003180
GO:0140115	export across plasma membrane	biological_process	7	7/ 1111	GENE_024896;GENE_019900;GENE_007104;GENE_022564;GENE_007132;GENE_023481;GENE_024749
GO:0046618	xenobiotic export from cell	biological_process	5	5/ 1111	GENE_024896;GENE_022564;GENE_007104;GENE_019900;GENE_023481
GO:0032940	secretion by cell	biological_process	1	1/ 1111	GENE_018535
GO:0031668	cellular response to extracellular stimulus	biological_process	2	2/ 1111	GENE_010372;GENE_009661
GO:0097577	sequestering of iron ion	biological_process	1	1/ 1111	GENE_011331
GO:1903047	mitotic cell cycle process	biological_process	2	2/ 1111	GENE_002374;GENE_016602
GO:1903046	meiotic cell cycle process	biological_process	1	1/ 1111	GENE_025421
GO:0044770	cell cycle phase transition	biological_process	1	1/ 1111	GENE_002374
GO:0061077	chaperone-mediated protein folding	biological_process	1	1/ 1111	GENE_020178
GO:0006458	'de novo' protein folding	biological_process	1	1/ 1111	GENE_020178
GO:0042026	protein refolding	biological_process	1	1/ 1111	GENE_020178
GO:0070727	cellular macromolecule localization	biological_process	5	5/ 1111	GENE_009848;GENE_009589;GENE_013334;GENE_018535;GENE_003180
GO:0046907	intracellular transport	biological_process	4	4/ 1111	GENE_004927;GENE_004821;GENE_009848;GENE_004934
GO:0006887	exocytosis	biological_process	1	1/ 1111	GENE_018535
GO:0048193	Golgi vesicle transport	biological_process	1	1/ 1111	GENE_009589
GO:0006897	endocytosis	biological_process	1	1/ 1111	GENE_020865
GO:0044085	cellular component biogenesis	biological_process	8	8/ 1111	GENE_023998;GENE_013534;GENE_016602;GENE_022451;GENE_017671;GENE_002276;GENE_001326;GENE_016163
GO:0016043	cellular component organization	biological_process	35	35/ 1111	GENE_013534;GENE_001035;GENE_025620;GENE_012061;GENE_003829;GENE_003318;GENE_008002;GENE_021038;GENE_016163;GENE_008119;GENE_025023;GENE_012256;GENE_002276;GENE_005667;GENE_017969;GENE_012605;GENE_013345;GENE_011561;GENE_016321;GENE_025995;GENE_014827;GENE_020687;GENE_025421;GENE_003180;GENE_009422;GENE_000375;GENE_013079;GENE_013875;GENE_014190;GENE_017973;GENE_017671;GENE_020050;GENE_020276;GEN…
GO:0042546	cell wall biogenesis	biological_process	8	8/ 1111	GENE_023998;GENE_013534;GENE_016602;GENE_022451;GENE_017671;GENE_002276;GENE_001326;GENE_016163
GO:0071555	cell wall organization	biological_process	13	13/ 1111	GENE_008002;GENE_013534;GENE_009422;GENE_005667;GENE_025620;GENE_013875;GENE_020687;GENE_017671;GENE_020050;GENE_012256;GENE_002276;GENE_003180;GENE_016163
GO:0071669	plant-type cell wall organization or biogenesis	biological_process	9	9/ 1111	GENE_008002;GENE_023998;GENE_020687;GENE_016602;GENE_009422;GENE_022451;GENE_012256;GENE_002276;GENE_001326
GO:0016477	cell migration	biological_process	1	1/ 1111	GENE_014190
GO:0007018	microtubule-based movement	biological_process	2	2/ 1111	GENE_025884;GENE_008390
GO:0000226	microtubule cytoskeleton organization	biological_process	5	5/ 1111	GENE_001035;GENE_013345;GENE_025023;GENE_012224;GENE_003829
GO:0070887	cellular response to chemical stimulus	biological_process	1	1/ 1111	GENE_009661
GO:0033554	cellular response to stress	biological_process	11	11/ 1111	GENE_021460;GENE_018516;GENE_010553;GENE_018532;GENE_005357;GENE_009661;GENE_006371;GENE_021544;GENE_018981;GENE_010372;GENE_003180
GO:0104004	cellular response to environmental stimulus	biological_process	2	2/ 1111	GENE_017798;GENE_009661
GO:0009826	unidimensional cell growth	biological_process	2	2/ 1111	GENE_013079;GENE_024831
GO:0007166	cell surface receptor signaling pathway	biological_process	12	12/ 1111	GENE_016710;GENE_001708;GENE_013183;GENE_019214;GENE_019318;GENE_019226;GENE_013753;GENE_019282;GENE_018852;GENE_025148;GENE_003745;GENE_003115
GO:0010019	chloroplast-nucleus signaling pathway	biological_process	1	1/ 1111	GENE_017064
GO:0009755	hormone-mediated signaling pathway	biological_process	35	35/ 1111	GENE_011691;GENE_011125;GENE_004199;GENE_010988;GENE_016949;GENE_013377;GENE_010843;GENE_002671;GENE_001329;GENE_013334;GENE_002678;GENE_001714;GENE_024749;GENE_026220;GENE_008717;GENE_000588;GENE_007132;GENE_009382;GENE_015100;GENE_023647;GENE_020903;GENE_002621;GENE_015529;GENE_024914;GENE_006477;GENE_001467;GENE_002720;GENE_000816;GENE_016920;GENE_013744;GENE_009058;GENE_016627;GENE_020270;GEN…
GO:0002764	immune response-regulating signaling pathway	biological_process	1	1/ 1111	GENE_009661
GO:0035556	intracellular signal transduction	biological_process	20	20/ 1111	GENE_016952;GENE_011691;GENE_013744;GENE_014344;GENE_010843;GENE_010988;GENE_008025;GENE_023647;GENE_010966;GENE_014047;GENE_003318;GENE_016920;GENE_008119;GENE_009058;GENE_016627;GENE_015100;GENE_002156;GENE_016782;GENE_016846;GENE_009382
GO:0110095	cellular detoxification of aldehyde	biological_process	1	1/ 1111	GENE_024728
GO:0000278	mitotic cell cycle	biological_process	5	5/ 1111	GENE_001035;GENE_013345;GENE_025023;GENE_012224;GENE_003829
GO:0045165	cell fate commitment	biological_process	1	1/ 1111	GENE_009077
GO:0030154	cell differentiation	biological_process	1	1/ 1111	GENE_015131
GO:0001708	cell fate specification	biological_process	1	1/ 1111	GENE_009077
GO:1903825	organic acid transmembrane transport	biological_process	5	5/ 1111	GENE_004821;GENE_013334;GENE_000588;GENE_016949;GENE_024262
GO:0034220	monoatomic ion transmembrane transport	biological_process	7	7/ 1111	GENE_008629;GENE_016966;GENE_008025;GENE_009848;GENE_013518;GENE_022471;GENE_002156
GO:0080162	endoplasmic reticulum to cytosol auxin transport	biological_process	1	1/ 1111	GENE_001329
GO:0072530	purine-containing compound transmembrane transport	biological_process	1	1/ 1111	GENE_017991
GO:0098739	import across plasma membrane	biological_process	1	1/ 1111	GENE_022471
GO:1901679	nucleotide transmembrane transport	biological_process	1	1/ 1111	GENE_017991
GO:0098660	inorganic ion transmembrane transport	biological_process	12	12/ 1111	GENE_008629;GENE_004821;GENE_013518;GENE_023148;GENE_008025;GENE_009848;GENE_016966;GENE_011744;GENE_008206;GENE_012293;GENE_022471;GENE_002156
GO:0048544	recognition of pollen	biological_process	7	7/ 1111	GENE_017553;GENE_009854;GENE_004254;GENE_006578;GENE_017744;GENE_025401;GENE_024153
GO:0030048	actin filament-based movement	biological_process	1	1/ 1111	GENE_017969
GO:0071695	anatomical structure maturation	biological_process	1	1/ 1111	GENE_008545
GO:0010927	cellular component assembly involved in morphogenesis	biological_process	1	1/ 1111	GENE_025995
GO:0001763	morphogenesis of a branching structure	biological_process	1	1/ 1111	GENE_026075
GO:0090698	post-embryonic plant morphogenesis	biological_process	1	1/ 1111	GENE_024458
GO:0000902	cell morphogenesis	biological_process	3	3/ 1111	GENE_024831;GENE_013079;GENE_004918
GO:0048731	system development	biological_process	4	4/ 1111	GENE_024086;GENE_003180;GENE_019617;GENE_024831
GO:0007275	multicellular organism development	biological_process	1	1/ 1111	GENE_019483
GO:0009888	tissue development	biological_process	2	2/ 1111	GENE_015131;GENE_016742
GO:0099402	plant organ development	biological_process	8	8/ 1111	GENE_008015;GENE_007399;GENE_000222;GENE_017331;GENE_020050;GENE_024086;GENE_001087;GENE_009192
GO:0010150	leaf senescence	biological_process	2	2/ 1111	GENE_023405;GENE_005545
GO:0048316	seed development	biological_process	2	2/ 1111	GENE_021274;GENE_024237
GO:0010374	stomatal complex development	biological_process	1	1/ 1111	GENE_015131
GO:0090567	reproductive shoot system development	biological_process	3	3/ 1111	GENE_003180;GENE_019617;GENE_024831
GO:0009790	embryo development	biological_process	1	1/ 1111	GENE_019483
GO:0065001	specification of axis polarity	biological_process	2	2/ 1111	GENE_012605;GENE_009077
GO:0003002	regionalization	biological_process	1	1/ 1111	GENE_020050
GO:0009615	response to virus	biological_process	3	3/ 1111	GENE_012300;GENE_011254;GENE_012171
GO:0009617	response to bacterium	biological_process	9	9/ 1111	GENE_020311;GENE_009857;GENE_008835;GENE_023314;GENE_023125;GENE_009995;GENE_018779;GENE_005617;GENE_003180
GO:0009620	response to fungus	biological_process	12	12/ 1111	GENE_017900;GENE_002458;GENE_002467;GENE_008835;GENE_006857;GENE_024257;GENE_018821;GENE_020427;GENE_018793;GENE_006094;GENE_018829;GENE_003180
GO:0098542	defense response to other organism	biological_process	25	25/ 1111	GENE_009857;GENE_002458;GENE_012300;GENE_006857;GENE_023125;GENE_009995;GENE_018821;GENE_020427;GENE_021488;GENE_018829;GENE_024257;GENE_017073;GENE_017900;GENE_023314;GENE_002467;GENE_012171;GENE_008835;GENE_018947;GENE_018779;GENE_020414;GENE_003180;GENE_020311;GENE_006094;GENE_010371;GENE_005617
GO:0009608	response to symbiont	biological_process	1	1/ 1111	GENE_018793
GO:0002239	response to oomycetes	biological_process	7	7/ 1111	GENE_020311;GENE_009857;GENE_023314;GENE_023125;GENE_009995;GENE_018779;GENE_005617
GO:0060560	developmental growth involved in morphogenesis	biological_process	2	2/ 1111	GENE_013079;GENE_024831
GO:0051651	maintenance of location in cell	biological_process	1	1/ 1111	GENE_011331
GO:0051238	sequestering of metal ion	biological_process	1	1/ 1111	GENE_011331
GO:0045184	establishment of protein localization	biological_process	4	4/ 1111	GENE_009589;GENE_013334;GENE_018535;GENE_009848
GO:0051649	establishment of localization in cell	biological_process	4	4/ 1111	GENE_004927;GENE_004821;GENE_009848;GENE_004934
GO:0006810	transport	biological_process	56	56/ 1111	GENE_004821;GENE_013518;GENE_011125;GENE_023148;GENE_016949;GENE_004129;GENE_018535;GENE_010869;GENE_001329;GENE_016966;GENE_007104;GENE_017991;GENE_019417;GENE_024749;GENE_003832;GENE_022247;GENE_019642;GENE_008025;GENE_026220;GENE_009848;GENE_000588;GENE_008206;GENE_007132;GENE_023481;GENE_012626;GENE_011744;GENE_017128;GENE_019900;GENE_014537;GENE_004934;GENE_018567;GENE_020865;GENE_014693;GEN…
GO:0033037	polysaccharide localization	biological_process	1	1/ 1111	GENE_003180
GO:0043207	response to external biotic stimulus	biological_process	28	28/ 1111	GENE_009857;GENE_002458;GENE_012300;GENE_006857;GENE_023125;GENE_009995;GENE_018821;GENE_020427;GENE_021488;GENE_018829;GENE_024257;GENE_017073;GENE_011254;GENE_017900;GENE_023314;GENE_002467;GENE_018793;GENE_012171;GENE_008835;GENE_018947;GENE_018779;GENE_003636;GENE_020414;GENE_003180;GENE_020311;GENE_006094;GENE_010371;GENE_005617
GO:0009606	tropism	biological_process	1	1/ 1111	GENE_013809
GO:0009991	response to extracellular stimulus	biological_process	2	2/ 1111	GENE_010372;GENE_009661
GO:0071496	cellular response to external stimulus	biological_process	2	2/ 1111	GENE_010372;GENE_009661
GO:0009725	response to hormone	biological_process	5	5/ 1111	GENE_020591;GENE_024065;GENE_001148;GENE_003180;GENE_001481
GO:0009611	response to wounding	biological_process	4	4/ 1111	GENE_025552;GENE_016568;GENE_013815;GENE_009661
GO:0009409	response to cold	biological_process	2	2/ 1111	GENE_013079;GENE_009661
GO:0009408	response to heat	biological_process	2	2/ 1111	GENE_022743;GENE_003180
GO:0006952	defense response	biological_process	51	51/ 1111	GENE_009857;GENE_011691;GENE_002458;GENE_003211;GENE_012300;GENE_006857;GENE_023125;GENE_003984;GENE_001071;GENE_018821;GENE_020427;GENE_002678;GENE_005551;GENE_021488;GENE_018829;GENE_013386;GENE_020302;GENE_026308;GENE_004269;GENE_002671;GENE_024257;GENE_017073;GENE_011252;GENE_025165;GENE_022855;GENE_014898;GENE_017900;GENE_023314;GENE_002467;GENE_002111;GENE_025204;GENE_010371;GENE_002621;GEN…
GO:0006970	response to osmotic stress	biological_process	1	1/ 1111	GENE_009661
GO:0006979	response to oxidative stress	biological_process	12	12/ 1111	GENE_007898;GENE_013346;GENE_005863;GENE_000868;GENE_006836;GENE_005876;GENE_022562;GENE_002194;GENE_007708;GENE_018835;GENE_003180;GENE_022443
GO:0009414	response to water deprivation	biological_process	2	2/ 1111	GENE_000507;GENE_009661
GO:1901700	response to oxygen-containing compound	biological_process	6	6/ 1111	GENE_009661;GENE_000507;GENE_001148;GENE_003180;GENE_011254;GENE_009108
GO:1902074	response to salt	biological_process	2	2/ 1111	GENE_000507;GENE_009661
GO:1901698	response to nitrogen compound	biological_process	1	1/ 1111	GENE_001148
GO:0001101	response to acid chemical	biological_process	2	2/ 1111	GENE_000507;GENE_009661
GO:0010035	response to inorganic substance	biological_process	5	5/ 1111	GENE_000507;GENE_009661;GENE_021274;GENE_003180;GENE_018793
GO:0010033	response to organic substance	biological_process	8	8/ 1111	GENE_020591;GENE_001481;GENE_009661;GENE_000507;GENE_024065;GENE_001148;GENE_003180;GENE_011254
GO:0009266	response to temperature stimulus	biological_process	5	5/ 1111	GENE_022743;GENE_000507;GENE_009661;GENE_003180;GENE_013079
GO:0009314	response to radiation	biological_process	9	9/ 1111	GENE_024458;GENE_024831;GENE_010884;GENE_010852;GENE_009661;GENE_000815;GENE_015875;GENE_017798;GENE_009371
GO:0009629	response to gravity	biological_process	1	1/ 1111	GENE_013809
GO:0009415	response to water	biological_process	2	2/ 1111	GENE_000507;GENE_009661
GO:0071214	cellular response to abiotic stimulus	biological_process	2	2/ 1111	GENE_017798;GENE_009661
GO:0000785	chromatin	cellular_component	1	1/ 1111	GENE_021302
GO:0000786	nucleosome	cellular_component	1	1/ 1111	GENE_016502
GO:0000118	histone deacetylase complex	cellular_component	2	2/ 1111	GENE_021302;GENE_009254
GO:0005681	spliceosomal complex	cellular_component	1	1/ 1111	GENE_021827
GO:0055029	nuclear DNA-directed RNA polymerase complex	cellular_component	1	1/ 1111	GENE_016321
GO:0030532	small nuclear ribonucleoprotein complex	cellular_component	1	1/ 1111	GENE_021827
GO:0000152	nuclear ubiquitin ligase complex	cellular_component	1	1/ 1111	GENE_021460
GO:0070531	BRCA1-A complex	cellular_component	1	1/ 1111	GENE_021460
GO:0031380	nuclear RNA-directed RNA polymerase complex	cellular_component	1	1/ 1111	GENE_011254
GO:0000015	phosphopyruvate hydratase complex	cellular_component	1	1/ 1111	GENE_004918
GO:1903293	phosphatase complex	cellular_component	2	2/ 1111	GENE_015451;GENE_007305
GO:1990204	oxidoreductase complex	cellular_component	1	1/ 1111	GENE_003873
GO:0045239	tricarboxylic acid cycle enzyme complex	cellular_component	1	1/ 1111	GENE_003873
GO:1905348	endonuclease complex	cellular_component	1	1/ 1111	GENE_002282
GO:1990234	transferase complex	cellular_component	7	7/ 1111	GENE_002374;GENE_021460;GENE_010042;GENE_016321;GENE_004651;GENE_022120;GENE_011254
GO:1903600	glutaminase complex	cellular_component	1	1/ 1111	GENE_023946
GO:0033178	proton-transporting two-sector ATPase complex, catalytic domain	cellular_component	1	1/ 1111	GENE_001084
GO:0098807	chloroplast thylakoid membrane protein complex	cellular_component	1	1/ 1111	GENE_005336
GO:0030117	membrane coat	cellular_component	2	2/ 1111	GENE_009589;GENE_020865
GO:0009521	photosystem	cellular_component	6	6/ 1111	GENE_005336;GENE_010884;GENE_010852;GENE_018796;GENE_000815;GENE_009371
GO:0030062	mitochondrial tricarboxylic acid cycle enzyme complex	cellular_component	1	1/ 1111	GENE_003873
GO:0000145	exocyst	cellular_component	1	1/ 1111	GENE_018535
GO:0030677	ribonuclease P complex	cellular_component	1	1/ 1111	GENE_002282
GO:0030684	preribosome	cellular_component	1	1/ 1111	GENE_012171
GO:0044391	ribosomal subunit	cellular_component	1	1/ 1111	GENE_025569
GO:0042575	DNA polymerase complex	cellular_component	1	1/ 1111	GENE_004651
GO:0000151	ubiquitin ligase complex	cellular_component	3	3/ 1111	GENE_021460;GENE_010042;GENE_022120
GO:0030014	CCR4-NOT complex	cellular_component	1	1/ 1111	GENE_018406
GO:0030015	CCR4-NOT core complex	cellular_component	1	1/ 1111	GENE_018406
GO:0030880	RNA polymerase complex	cellular_component	2	2/ 1111	GENE_016321;GENE_011254
GO:0043229	intracellular organelle	cellular_component	183	183/ 1111	GENE_020865;GENE_015056;GENE_014344;GENE_007871;GENE_013377;GENE_010843;GENE_021857;GENE_005559;GENE_002720;GENE_014743;GENE_001633;GENE_024458;GENE_001307;GENE_019417;GENE_004346;GENE_017847;GENE_012968;GENE_018532;GENE_004156;GENE_017331;GENE_008676;GENE_007132;GENE_003344;GENE_013894;GENE_021038;GENE_015274;GENE_016321;GENE_013203;GENE_018907;GENE_010490;GENE_025552;GENE_020903;GENE_012171;GEN…
GO:0043228	non-membrane-bounded organelle	cellular_component	11	11/ 1111	GENE_018406;GENE_020829;GENE_014190;GENE_020056;GENE_012171;GENE_022588;GENE_008119;GENE_015743;GENE_003318;GENE_013894;GENE_010353
GO:0043227	membrane-bounded organelle	cellular_component	176	176/ 1111	GENE_020865;GENE_015056;GENE_014344;GENE_007871;GENE_013377;GENE_010843;GENE_021857;GENE_005559;GENE_002720;GENE_014743;GENE_001633;GENE_024458;GENE_001307;GENE_019417;GENE_004346;GENE_017847;GENE_012968;GENE_018532;GENE_004156;GENE_017331;GENE_008676;GENE_007132;GENE_003344;GENE_021038;GENE_015274;GENE_016321;GENE_013203;GENE_018907;GENE_010490;GENE_025552;GENE_020903;GENE_001708;GENE_009378;GEN…
GO:0031090	organelle membrane	cellular_component	26	26/ 1111	GENE_020698;GENE_002612;GENE_002577;GENE_011331;GENE_004821;GENE_017991;GENE_001713;GENE_004927;GENE_010884;GENE_022451;GENE_022643;GENE_004934;GENE_011744;GENE_002276;GENE_005667;GENE_000912;GENE_005336;GENE_010852;GENE_014537;GENE_012293;GENE_009371;GENE_008629;GENE_009589;GENE_016920;GENE_018796;GENE_000815
GO:0019867	outer membrane	cellular_component	9	9/ 1111	GENE_002612;GENE_002577;GENE_005336;GENE_010884;GENE_010852;GENE_001713;GENE_018796;GENE_000815;GENE_009371
GO:0005886	plasma membrane	cellular_component	74	74/ 1111	GENE_021662;GENE_009857;GENE_002458;GENE_000084;GENE_002203;GENE_023148;GENE_003745;GENE_006857;GENE_025660;GENE_016952;GENE_023125;GENE_009995;GENE_012585;GENE_021580;GENE_019642;GENE_003318;GENE_024749;GENE_024914;GENE_008015;GENE_005183;GENE_021460;GENE_018004;GENE_004199;GENE_010418;GENE_023998;GENE_008025;GENE_019318;GENE_009552;GENE_018588;GENE_020226;GENE_008119;GENE_021274;GENE_017074;GEN…
GO:0034357	photosynthetic membrane	cellular_component	6	6/ 1111	GENE_005336;GENE_010884;GENE_010852;GENE_018796;GENE_000815;GENE_009371
GO:0005618	cell wall	cellular_component	3	3/ 1111	GENE_018835;GENE_013346;GENE_002194
GO:0070161	anchoring junction	cellular_component	3	3/ 1111	GENE_009357;GENE_021488;GENE_009424
GO:0048046	apoplast	cellular_component	14	14/ 1111	GENE_002119;GENE_020577;GENE_024629;GENE_007927;GENE_013534;GENE_008630;GENE_021648;GENE_017671;GENE_019050;GENE_016163;GENE_008560;GENE_005907;GENE_000267;GENE_002174
GO:0009570	chloroplast stroma	cellular_component	2	2/ 1111	GENE_021693;GENE_001933
GO:0016607	nuclear speck	cellular_component	1	1/ 1111	GENE_013722
GO:0035770	ribonucleoprotein granule	cellular_component	1	1/ 1111	GENE_018406
GO:0099081	supramolecular polymer	cellular_component	9	9/ 1111	GENE_019908;GENE_013345;GENE_025884;GENE_001035;GENE_008390;GENE_017331;GENE_025023;GENE_003829;GENE_012224
GO:0008135	translation factor activity, RNA binding	molecular_function	2	2/ 1111	GENE_001671;GENE_021038
GO:0003713	transcription coactivator activity	molecular_function	1	1/ 1111	GENE_018345
GO:0016987	sigma factor activity	molecular_function	1	1/ 1111	GENE_017798
GO:0000981	DNA-binding transcription factor activity, RNA polymerase II-specific	molecular_function	5	5/ 1111	GENE_012968;GENE_024790;GENE_014726;GENE_011936;GENE_022792
GO:0140664	ATP-dependent DNA damage sensor activity	molecular_function	1	1/ 1111	GENE_005357
GO:0003918	DNA topoisomerase type II (double strand cut, ATP-hydrolyzing) activity	molecular_function	1	1/ 1111	GENE_017973
GO:0004467	long-chain fatty acid-CoA ligase activity	molecular_function	1	1/ 1111	GENE_025281
GO:0031956	medium-chain fatty acid-CoA ligase activity	molecular_function	1	1/ 1111	GENE_024487
GO:0140359	ABC-type transporter activity	molecular_function	14	14/ 1111	GENE_001973;GENE_019417;GENE_005159;GENE_017406;GENE_017389;GENE_000311;GENE_005141;GENE_017735;GENE_002884;GENE_005226;GENE_003174;GENE_003832;GENE_020563;GENE_017323
GO:0140358	P-type transmembrane transporter activity	molecular_function	3	3/ 1111	GENE_017847;GENE_002189;GENE_010869
GO:0019829	ATPase-coupled monoatomic cation transmembrane transporter activity	molecular_function	5	5/ 1111	GENE_017847;GENE_002189;GENE_001084;GENE_001615;GENE_010869
GO:0042625	ATPase-coupled ion transmembrane transporter activity	molecular_function	1	1/ 1111	GENE_001084
GO:0140825	lactoperoxidase activity	molecular_function	10	10/ 1111	GENE_013346;GENE_005863;GENE_007898;GENE_006836;GENE_005876;GENE_022562;GENE_002194;GENE_007708;GENE_018835;GENE_022443
GO:0042887	amide transmembrane transporter activity	molecular_function	2	2/ 1111	GENE_021274;GENE_007951
GO:0015603	iron chelate transmembrane transporter activity	molecular_function	1	1/ 1111	GENE_021274
GO:0015605	organophosphate ester transmembrane transporter activity	molecular_function	2	2/ 1111	GENE_000912;GENE_017991
GO:1901702	salt transmembrane transporter activity	molecular_function	14	14/ 1111	GENE_008629;GENE_004821;GENE_014041;GENE_001527;GENE_001828;GENE_010869;GENE_024819;GENE_022471;GENE_012626;GENE_013974;GENE_017847;GENE_000248;GENE_017991;GENE_002189
GO:1901682	sulfur compound transmembrane transporter activity	molecular_function	3	3/ 1111	GENE_004821;GENE_001828;GENE_000248
GO:0008514	organic anion transmembrane transporter activity	molecular_function	9	9/ 1111	GENE_004821;GENE_013334;GENE_000912;GENE_016949;GENE_023988;GENE_000588;GENE_017991;GENE_024262;GENE_023467
GO:0005342	organic acid transmembrane transporter activity	molecular_function	7	7/ 1111	GENE_004821;GENE_013334;GENE_000912;GENE_016949;GENE_000588;GENE_024262;GENE_023467
GO:0015144	carbohydrate transmembrane transporter activity	molecular_function	3	3/ 1111	GENE_022611;GENE_019642;GENE_022353
GO:0022803	passive transmembrane transporter activity	molecular_function	14	14/ 1111	GENE_023148;GENE_013512;GENE_001527;GENE_008390;GENE_004710;GENE_012626;GENE_021239;GENE_011757;GENE_024819;GENE_021325;GENE_003248;GENE_004190;GENE_001713;GENE_012225
GO:0022804	active transmembrane transporter activity	molecular_function	48	48/ 1111	GENE_001973;GENE_004821;GENE_016966;GENE_011125;GENE_015056;GENE_024224;GENE_024896;GENE_016949;GENE_017389;GENE_005141;GENE_010869;GENE_022564;GENE_013334;GENE_001615;GENE_017991;GENE_019417;GENE_001084;GENE_017406;GENE_026220;GENE_000248;GENE_009848;GENE_002884;GENE_000588;GENE_023481;GENE_011744;GENE_019900;GENE_005159;GENE_000912;GENE_001828;GENE_020563;GENE_005226;GENE_022471;GENE_012293;GEN…
GO:1901505	carbohydrate derivative transmembrane transporter activity	molecular_function	2	2/ 1111	GENE_017991;GENE_023988
GO:0015932	nucleobase-containing compound transmembrane transporter activity	molecular_function	2	2/ 1111	GENE_017991;GENE_023988
GO:0015075	monoatomic ion transmembrane transporter activity	molecular_function	27	27/ 1111	GENE_013518;GENE_001084;GENE_013512;GENE_003744;GENE_011331;GENE_008390;GENE_010869;GENE_001615;GENE_001713;GENE_000248;GENE_021239;GENE_008206;GENE_014041;GENE_001828;GENE_022611;GENE_013974;GENE_017847;GENE_008629;GENE_009460;GENE_015819;GENE_003248;GENE_011757;GENE_021325;GENE_022471;GENE_002189;GENE_004710;GENE_012225
GO:0042910	xenobiotic transmembrane transporter activity	molecular_function	6	6/ 1111	GENE_024224;GENE_019900;GENE_022564;GENE_007104;GENE_024896;GENE_023481
GO:0080161	auxin transmembrane transporter activity	molecular_function	2	2/ 1111	GENE_024749;GENE_007132
GO:0015203	polyamine transmembrane transporter activity	molecular_function	1	1/ 1111	GENE_025970
GO:0015318	inorganic molecular entity transmembrane transporter activity	molecular_function	22	22/ 1111	GENE_004821;GENE_023148;GENE_003744;GENE_011331;GENE_010869;GENE_001084;GENE_000248;GENE_011744;GENE_014041;GENE_012626;GENE_000912;GENE_001828;GENE_024819;GENE_022611;GENE_012293;GENE_013974;GENE_017847;GENE_008629;GENE_001527;GENE_022471;GENE_015819;GENE_002189
GO:0008047	enzyme activator activity	molecular_function	1	1/ 1111	GENE_001427
GO:0004857	enzyme inhibitor activity	molecular_function	17	17/ 1111	GENE_010433;GENE_024970;GENE_002671;GENE_017282;GENE_018766;GENE_019466;GENE_016093;GENE_002621;GENE_013875;GENE_002720;GENE_020422;GENE_025022;GENE_016032;GENE_016568;GENE_024829;GENE_002678;GENE_019910
GO:0055106	ubiquitin-protein transferase regulator activity	molecular_function	1	1/ 1111	GENE_001427
GO:0019207	kinase regulator activity	molecular_function	3	3/ 1111	GENE_002374;GENE_010433;GENE_018766
GO:0019208	phosphatase regulator activity	molecular_function	6	6/ 1111	GENE_002621;GENE_002671;GENE_002720;GENE_015451;GENE_002678;GENE_007305
GO:0061134	peptidase regulator activity	molecular_function	7	7/ 1111	GENE_019466;GENE_017282;GENE_016093;GENE_020422;GENE_016032;GENE_016568;GENE_019910
GO:0000774	adenyl-nucleotide exchange factor activity	molecular_function	1	1/ 1111	GENE_021378
GO:0003676	nucleic acid binding	molecular_function	137	137/ 1111	GENE_000908;GENE_011247;GENE_016323;GENE_001038;GENE_013377;GENE_010843;GENE_024907;GENE_014743;GENE_001633;GENE_003434;GENE_001307;GENE_002282;GENE_004015;GENE_012968;GENE_008676;GENE_003344;GENE_022443;GENE_015274;GENE_018907;GENE_010490;GENE_012171;GENE_010383;GENE_017798;GENE_010708;GENE_016228;GENE_019617;GENE_025815;GENE_013079;GENE_022792;GENE_016627;GENE_013571;GENE_022611;GENE_016846;GEN…
GO:1901265	nucleoside phosphate binding	molecular_function	180	180/ 1111	GENE_001136;GENE_024658;GENE_011007;GENE_014344;GENE_001035;GENE_005141;GENE_003115;GENE_023125;GENE_021580;GENE_003434;GENE_019417;GENE_017847;GENE_017406;GENE_006705;GENE_019318;GENE_010966;GENE_009552;GENE_017331;GENE_002884;GENE_025148;GENE_013894;GENE_011656;GENE_005159;GENE_001786;GENE_014040;GENE_019696;GENE_014168;GENE_019916;GENE_001317;GENE_025401;GENE_003832;GENE_003180;GENE_018852;GEN…
GO:0046906	tetrapyrrole binding	molecular_function	47	47/ 1111	GENE_002658;GENE_012301;GENE_007898;GENE_006836;GENE_017813;GENE_003809;GENE_016232;GENE_022562;GENE_018796;GENE_002280;GENE_002577;GENE_017427;GENE_022365;GENE_010884;GENE_013708;GENE_009201;GENE_005876;GENE_002194;GENE_017313;GENE_022443;GENE_015743;GENE_013346;GENE_020793;GENE_000868;GENE_000849;GENE_010852;GENE_025995;GENE_026135;GENE_002427;GENE_017419;GENE_007708;GENE_018835;GENE_009371;GEN…
GO:0070279	vitamin B6 binding	molecular_function	6	6/ 1111	GENE_023087;GENE_006371;GENE_008726;GENE_000507;GENE_014530;GENE_015663
GO:0019899	enzyme binding	molecular_function	3	3/ 1111	GENE_003318;GENE_008119;GENE_011609
GO:0051087	protein-folding chaperone binding	molecular_function	1	1/ 1111	GENE_021378
GO:0051082	unfolded protein binding	molecular_function	1	1/ 1111	GENE_012172
GO:0005516	calmodulin binding	molecular_function	9	9/ 1111	GENE_013386;GENE_020302;GENE_014344;GENE_003211;GENE_025644;GENE_016952;GENE_017847;GENE_016782;GENE_017969
GO:0031072	heat shock protein binding	molecular_function	1	1/ 1111	GENE_020178
GO:0140030	modification-dependent protein binding	molecular_function	1	1/ 1111	GENE_016667
GO:0031369	translation initiation factor binding	molecular_function	1	1/ 1111	GENE_016321
GO:0005102	signaling receptor binding	molecular_function	3	3/ 1111	GENE_010980;GENE_011564;GENE_022743
GO:0008092	cytoskeletal protein binding	molecular_function	9	9/ 1111	GENE_019908;GENE_013710;GENE_020449;GENE_025884;GENE_014190;GENE_008390;GENE_001341;GENE_020742;GENE_017969
GO:0046983	protein dimerization activity	molecular_function	21	21/ 1111	GENE_021857;GENE_016871;GENE_024509;GENE_011468;GENE_016502;GENE_006890;GENE_015131;GENE_006211;GENE_025691;GENE_017304;GENE_013280;GENE_022632;GENE_023946;GENE_014464;GENE_003227;GENE_008676;GENE_016228;GENE_022545;GENE_005503;GENE_010708;GENE_024790
GO:0030276	clathrin binding	molecular_function	1	1/ 1111	GENE_020865
GO:0008061	chitin binding	molecular_function	11	11/ 1111	GENE_025241;GENE_008835;GENE_012945;GENE_009557;GENE_024257;GENE_001071;GENE_018821;GENE_013427;GENE_025165;GENE_018829;GENE_025204
GO:0032553	ribonucleotide binding	molecular_function	155	155/ 1111	GENE_011007;GENE_014344;GENE_001035;GENE_005141;GENE_023125;GENE_021580;GENE_019417;GENE_017847;GENE_017406;GENE_006705;GENE_019318;GENE_010966;GENE_009552;GENE_017331;GENE_002884;GENE_025148;GENE_013894;GENE_011656;GENE_005159;GENE_001786;GENE_014040;GENE_019696;GENE_019916;GENE_018852;GENE_025401;GENE_003832;GENE_003180;GENE_017553;GENE_009276;GENE_019994;GENE_000311;GENE_003031;GENE_016920;GEN…
GO:0043169	cation binding	molecular_function	155	155/ 1111	GENE_015266;GENE_010849;GENE_014344;GENE_024831;GENE_025660;GENE_019542;GENE_016232;GENE_022562;GENE_003434;GENE_012863;GENE_002280;GENE_022365;GENE_007795;GENE_019318;GENE_003809;GENE_002577;GENE_008676;GENE_019544;GENE_008468;GENE_025148;GENE_022443;GENE_011170;GENE_015274;GENE_018907;GENE_022954;GENE_007867;GENE_000868;GENE_015465;GENE_026135;GENE_021648;GENE_017419;GENE_009378;GENE_018852;GEN…
GO:0043168	anion binding	molecular_function	188	188/ 1111	GENE_001136;GENE_024658;GENE_011007;GENE_014344;GENE_001035;GENE_005141;GENE_022743;GENE_023125;GENE_002720;GENE_021580;GENE_003434;GENE_019417;GENE_017847;GENE_008015;GENE_017406;GENE_006705;GENE_019318;GENE_010966;GENE_009552;GENE_017331;GENE_002884;GENE_025148;GENE_013894;GENE_011656;GENE_005159;GENE_001786;GENE_014040;GENE_019696;GENE_014168;GENE_019916;GENE_018852;GENE_015663;GENE_025401;GEN…
GO:0005543	phospholipid binding	molecular_function	3	3/ 1111	GENE_020865;GENE_018535;GENE_012863
GO:0005504	fatty acid binding	molecular_function	2	2/ 1111	GENE_020414;GENE_010371
GO:0019840	isoprenoid binding	molecular_function	4	4/ 1111	GENE_002678;GENE_002671;GENE_002720;GENE_002621
GO:0019825	oxygen binding	molecular_function	1	1/ 1111	GENE_024303
GO:0043177	organic acid binding	molecular_function	7	7/ 1111	GENE_020414;GENE_002621;GENE_006920;GENE_002671;GENE_002720;GENE_010371;GENE_002678
GO:0043178	alcohol binding	molecular_function	4	4/ 1111	GENE_002678;GENE_002671;GENE_002720;GENE_002621
GO:0019842	vitamin binding	molecular_function	6	6/ 1111	GENE_023087;GENE_006371;GENE_008726;GENE_000507;GENE_014530;GENE_015663
GO:0000166	nucleotide binding	molecular_function	180	180/ 1111	GENE_001136;GENE_024658;GENE_011007;GENE_014344;GENE_001035;GENE_005141;GENE_003115;GENE_023125;GENE_021580;GENE_003434;GENE_019417;GENE_017847;GENE_017406;GENE_006705;GENE_019318;GENE_010966;GENE_009552;GENE_017331;GENE_002884;GENE_025148;GENE_013894;GENE_011656;GENE_005159;GENE_001786;GENE_014040;GENE_019696;GENE_014168;GENE_019916;GENE_001317;GENE_025401;GENE_003832;GENE_003180;GENE_018852;GEN…
GO:0030247	polysaccharide binding	molecular_function	14	14/ 1111	GENE_010771;GENE_002856;GENE_016710;GENE_003745;GENE_019318;GENE_004172;GENE_019226;GENE_008883;GENE_019282;GENE_018852;GENE_025148;GENE_010674;GENE_019214;GENE_000231
GO:0048039	ubiquinone binding	molecular_function	1	1/ 1111	GENE_002442
GO:0010427	abscisic acid binding	molecular_function	4	4/ 1111	GENE_002678;GENE_002671;GENE_002720;GENE_002621
GO:0043021	ribonucleoprotein complex binding	molecular_function	2	2/ 1111	GENE_021038;GENE_012171
GO:0003682	chromatin binding	molecular_function	2	2/ 1111	GENE_021302;GENE_011141
GO:0051015	actin filament binding	molecular_function	4	4/ 1111	GENE_020449;GENE_014190;GENE_013710;GENE_020742
GO:0010997	anaphase-promoting complex binding	molecular_function	1	1/ 1111	GENE_001427
GO:0051536	iron-sulfur cluster binding	molecular_function	1	1/ 1111	GENE_003710
GO:0051740	ethylene binding	molecular_function	1	1/ 1111	GENE_016920
GO:0004888	transmembrane signaling receptor activity	molecular_function	6	6/ 1111	GENE_020311;GENE_023314;GENE_009857;GENE_023125;GENE_009995;GENE_018779
GO:0038199	ethylene receptor activity	molecular_function	1	1/ 1111	GENE_016920
GO:0016877	ligase activity, forming carbon-sulfur bonds	molecular_function	4	4/ 1111	GENE_001770;GENE_000217;GENE_024487;GENE_025281
GO:0016879	ligase activity, forming carbon-nitrogen bonds	molecular_function	3	3/ 1111	GENE_003031;GENE_012271;GENE_003180
GO:0016840	carbon-nitrogen lyase activity	molecular_function	3	3/ 1111	GENE_006371;GENE_015663;GENE_023768
GO:0016835	carbon-oxygen lyase activity	molecular_function	9	9/ 1111	GENE_010625;GENE_021869;GENE_001106;GENE_026308;GENE_009378;GENE_004918;GENE_000544;GENE_010565;GENE_017599
GO:0016830	carbon-carbon lyase activity	molecular_function	5	5/ 1111	GENE_024317;GENE_000044;GENE_011568;GENE_018874;GENE_025021
GO:0047720	indoleacetaldoxime dehydratase activity	molecular_function	1	1/ 1111	GENE_020793
GO:0004721	phosphoprotein phosphatase activity	molecular_function	5	5/ 1111	GENE_026313;GENE_007999;GENE_013710;GENE_024908;GENE_013551
GO:0019787	ubiquitin-like protein transferase activity	molecular_function	13	13/ 1111	GENE_006685;GENE_023418;GENE_021460;GENE_006986;GENE_001708;GENE_021451;GENE_017301;GENE_015465;GENE_021736;GENE_008615;GENE_013753;GENE_012907;GENE_004130
GO:0033558	protein lysine deacetylase activity	molecular_function	1	1/ 1111	GENE_009254
GO:0004672	protein kinase activity	molecular_function	95	95/ 1111	GENE_021662;GENE_011007;GENE_014344;GENE_023125;GENE_021580;GENE_019318;GENE_010966;GENE_009552;GENE_025148;GENE_017553;GENE_001786;GENE_014040;GENE_019696;GENE_018852;GENE_025401;GENE_011656;GENE_009276;GENE_019994;GENE_016920;GENE_009765;GENE_002458;GENE_003745;GENE_023314;GENE_009585;GENE_001494;GENE_005369;GENE_007817;GENE_017708;GENE_019226;GENE_002595;GENE_022743;GENE_004172;GENE_016398;GEN…
GO:0140993	histone modifying activity	molecular_function	2	2/ 1111	GENE_021302;GENE_009254
GO:0008233	peptidase activity	molecular_function	20	20/ 1111	GENE_012172;GENE_017231;GENE_000373;GENE_004014;GENE_016671;GENE_001106;GENE_011826;GENE_007769;GENE_012585;GENE_018257;GENE_016542;GENE_021275;GENE_021156;GENE_016177;GENE_013671;GENE_019542;GENE_024275;GENE_008084;GENE_021110;GENE_017598
GO:0140457	protein demethylase activity	molecular_function	1	1/ 1111	GENE_021302
GO:0008641	ubiquitin-like modifier activating enzyme activity	molecular_function	1	1/ 1111	GENE_000217
GO:0016798	hydrolase activity, acting on glycosyl bonds	molecular_function	36	36/ 1111	GENE_009589;GENE_011265;GENE_011475;GENE_013534;GENE_001071;GENE_018821;GENE_018829;GENE_007817;GENE_022134;GENE_025681;GENE_020170;GENE_018105;GENE_009661;GENE_024257;GENE_012417;GENE_012209;GENE_025165;GENE_025288;GENE_025204;GENE_005157;GENE_025326;GENE_017989;GENE_025241;GENE_018981;GENE_012111;GENE_002737;GENE_013918;GENE_001287;GENE_014190;GENE_017671;GENE_005942;GENE_018155;GENE_013427;GEN…
GO:0016810	hydrolase activity, acting on carbon-nitrogen (but not peptide) bonds	molecular_function	7	7/ 1111	GENE_011726;GENE_021565;GENE_000084;GENE_023946;GENE_009254;GENE_018874;GENE_005559
GO:0016817	hydrolase activity, acting on acid anhydrides	molecular_function	37	37/ 1111	GENE_001973;GENE_001035;GENE_017389;GENE_005141;GENE_001615;GENE_003829;GENE_019417;GENE_003318;GENE_017847;GENE_017406;GENE_019620;GENE_008119;GENE_020046;GENE_021275;GENE_002884;GENE_025023;GENE_005159;GENE_013345;GENE_002111;GENE_012172;GENE_003174;GENE_019916;GENE_005226;GENE_001317;GENE_019180;GENE_003832;GENE_020092;GENE_025852;GENE_000311;GENE_017735;GENE_017323;GENE_010372;GENE_004651;GEN…
GO:0017171	serine hydrolase activity	molecular_function	7	7/ 1111	GENE_004014;GENE_017231;GENE_012172;GENE_013671;GENE_024275;GENE_008084;GENE_017598
GO:0016788	hydrolase activity, acting on ester bonds	molecular_function	61	61/ 1111	GENE_009899;GENE_020698;GENE_009878;GENE_024459;GENE_013551;GENE_003528;GENE_012300;GENE_007999;GENE_009589;GENE_019962;GENE_025620;GENE_006422;GENE_009186;GENE_024728;GENE_004346;GENE_024908;GENE_017073;GENE_018516;GENE_010553;GENE_010418;GENE_010961;GENE_020771;GENE_024332;GENE_008119;GENE_018532;GENE_006160;GENE_020342;GENE_002413;GENE_009959;GENE_022462;GENE_020386;GENE_008936;GENE_013710;GEN…
GO:0019213	deacetylase activity	molecular_function	1	1/ 1111	GENE_009254
GO:0016614	oxidoreductase activity, acting on CH-OH group of donors	molecular_function	11	11/ 1111	GENE_004681;GENE_008936;GENE_002612;GENE_021869;GENE_023191;GENE_020584;GENE_010418;GENE_025259;GENE_025021;GENE_024728;GENE_006544
GO:0016903	oxidoreductase activity, acting on the aldehyde or oxo group of donors	molecular_function	4	4/ 1111	GENE_011664;GENE_008325;GENE_003873;GENE_018094
GO:0016679	oxidoreductase activity, acting on diphenols and related substances as donors	molecular_function	8	8/ 1111	GENE_002119;GENE_015266;GENE_007927;GENE_008630;GENE_000267;GENE_008560;GENE_003947;GENE_002174
GO:0016645	oxidoreductase activity, acting on the CH-NH group of donors	molecular_function	5	5/ 1111	GENE_001136;GENE_025639;GENE_006862;GENE_017917;GENE_004156
GO:0051213	dioxygenase activity	molecular_function	9	9/ 1111	GENE_015703;GENE_021693;GENE_000868;GENE_005883;GENE_008650;GENE_024831;GENE_015875;GENE_007022;GENE_018980
GO:0009055	electron transfer activity	molecular_function	12	12/ 1111	GENE_010019;GENE_002465;GENE_015056;GENE_022353;GENE_002448;GENE_010194;GENE_003710;GENE_017073;GENE_010112;GENE_019011;GENE_001277;GENE_022045
GO:0016705	oxidoreductase activity, acting on paired donors, with incorporation or reduction of molecular oxygen	molecular_function	33	33/ 1111	GENE_012301;GENE_008468;GENE_020793;GENE_017813;GENE_016232;GENE_002069;GENE_009201;GENE_017427;GENE_022365;GENE_003809;GENE_002577;GENE_017313;GENE_015743;GENE_000849;GENE_025995;GENE_026135;GENE_002427;GENE_017419;GENE_024831;GENE_020353;GENE_017432;GENE_020093;GENE_014848;GENE_020056;GENE_010406;GENE_009404;GENE_013708;GENE_022789;GENE_015875;GENE_019120;GENE_022965;GENE_017199;GENE_009074
GO:0016701	oxidoreductase activity, acting on single donors with incorporation of molecular oxygen	molecular_function	5	5/ 1111	GENE_007022;GENE_005883;GENE_021693;GENE_000868;GENE_018793
GO:0016627	oxidoreductase activity, acting on the CH-CH group of donors	molecular_function	4	4/ 1111	GENE_022535;GENE_014168;GENE_007038;GENE_006477
GO:0016651	oxidoreductase activity, acting on NAD(P)H	molecular_function	3	3/ 1111	GENE_017571;GENE_025660;GENE_015056
GO:0016684	oxidoreductase activity, acting on peroxide as acceptor	molecular_function	12	12/ 1111	GENE_007898;GENE_013346;GENE_005863;GENE_006836;GENE_000868;GENE_025660;GENE_005876;GENE_022562;GENE_002194;GENE_007708;GENE_018835;GENE_022443
GO:0004497	monooxygenase activity	molecular_function	36	36/ 1111	GENE_015266;GENE_012301;GENE_013708;GENE_017813;GENE_016232;GENE_002069;GENE_024924;GENE_003434;GENE_009201;GENE_016250;GENE_017427;GENE_022365;GENE_016296;GENE_003809;GENE_002577;GENE_017313;GENE_015743;GENE_020793;GENE_000849;GENE_025995;GENE_026135;GENE_002427;GENE_017419;GENE_016323;GENE_017432;GENE_020093;GENE_014848;GENE_010406;GENE_009404;GENE_020056;GENE_022789;GENE_018793;GENE_019120;GEN…
GO:0016638	oxidoreductase activity, acting on the CH-NH2 group of donors	molecular_function	2	2/ 1111	GENE_022585;GENE_000656
GO:0016667	oxidoreductase activity, acting on a sulfur group of donors	molecular_function	2	2/ 1111	GENE_023357;GENE_010465
GO:0003796	lysozyme activity	molecular_function	1	1/ 1111	GENE_009661
GO:0003916	DNA topoisomerase activity	molecular_function	1	1/ 1111	GENE_017973
GO:0016866	intramolecular transferase activity	molecular_function	1	1/ 1111	GENE_020829
GO:0016860	intramolecular oxidoreductase activity	molecular_function	1	1/ 1111	GENE_021869
GO:0016854	racemase and epimerase activity	molecular_function	1	1/ 1111	GENE_021869
GO:0140098	catalytic activity, acting on RNA	molecular_function	22	22/ 1111	GENE_011247;GENE_012300;GENE_009589;GENE_019962;GENE_006422;GENE_024728;GENE_010418;GENE_017073;GENE_011254;GENE_008936;GENE_011327;GENE_012171;GENE_008835;GENE_007708;GENE_024717;GENE_026218;GENE_018406;GENE_010442;GENE_022443;GENE_011638;GENE_022611;GENE_011261
GO:0140097	catalytic activity, acting on DNA	molecular_function	14	14/ 1111	GENE_023895;GENE_000373;GENE_010553;GENE_018981;GENE_018532;GENE_016542;GENE_005357;GENE_006371;GENE_019542;GENE_017973;GENE_004651;GENE_003174;GENE_018516;GENE_019733
GO:0004386	helicase activity	molecular_function	5	5/ 1111	GENE_012529;GENE_000080;GENE_026218;GENE_013894;GENE_020235
GO:0016765	transferase activity, transferring alkyl or aryl (other than methyl) groups	molecular_function	14	14/ 1111	GENE_022807;GENE_001472;GENE_013013;GENE_008623;GENE_008632;GENE_010499;GENE_010465;GENE_023370;GENE_022482;GENE_009413;GENE_008583;GENE_013986;GENE_006476;GENE_015288
GO:0016769	transferase activity, transferring nitrogenous groups	molecular_function	4	4/ 1111	GENE_008726;GENE_016840;GENE_014530;GENE_023087
GO:0016782	transferase activity, transferring sulphur-containing groups	molecular_function	2	2/ 1111	GENE_003644;GENE_025248
GO:0016757	glycosyltransferase activity	molecular_function	27	27/ 1111	GENE_023068;GENE_013534;GENE_001686;GENE_001713;GENE_006508;GENE_008267;GENE_011662;GENE_010954;GENE_022643;GENE_002276;GENE_017666;GENE_005667;GENE_017663;GENE_024645;GENE_006478;GENE_000507;GENE_001256;GENE_022515;GENE_026054;GENE_019589;GENE_003852;GENE_000195;GENE_017671;GENE_020050;GENE_016602;GENE_012421;GENE_016163
GO:0016744	transketolase or transaldolase activity	molecular_function	1	1/ 1111	GENE_009186
GO:0016772	transferase activity, transferring phosphorus-containing groups	molecular_function	120	120/ 1111	GENE_021662;GENE_011247;GENE_011007;GENE_004476;GENE_014344;GENE_016542;GENE_023125;GENE_021580;GENE_019318;GENE_010966;GENE_009552;GENE_025148;GENE_011656;GENE_001786;GENE_014040;GENE_019696;GENE_018852;GENE_019542;GENE_025401;GENE_017553;GENE_009276;GENE_019994;GENE_016920;GENE_011254;GENE_009765;GENE_002458;GENE_003745;GENE_013845;GENE_016952;GENE_009585;GENE_001494;GENE_005369;GENE_007817;GEN…
GO:0016741	transferase activity, transferring one-carbon groups	molecular_function	19	19/ 1111	GENE_012961;GENE_022807;GENE_024509;GENE_003889;GENE_007867;GENE_018744;GENE_003853;GENE_003755;GENE_006633;GENE_017372;GENE_013228;GENE_017304;GENE_024994;GENE_011278;GENE_003227;GENE_013013;GENE_021302;GENE_011251;GENE_000017
GO:0016746	acyltransferase activity	molecular_function	34	34/ 1111	GENE_023418;GENE_007871;GENE_007899;GENE_025314;GENE_019805;GENE_004130;GENE_005552;GENE_021460;GENE_021164;GENE_011668;GENE_012945;GENE_017928;GENE_008615;GENE_013753;GENE_012907;GENE_016428;GENE_010188;GENE_015465;GENE_024115;GENE_007919;GENE_006685;GENE_001708;GENE_000653;GENE_010815;GENE_007646;GENE_000900;GENE_021736;GENE_006986;GENE_008545;GENE_002136;GENE_021451;GENE_017301;GENE_012085;GEN…
2. DA P.m 5DPI vs DA CK 5DPI
GO ID	Description	Term Type	DA P.m 5DPI vs DA CK 5DPI num	DA P.m 1DPI vs DA CK 1DPI percent	DA P.m 1DPI vs DA CK 1DPI Gene_ids
GO:0019222	regulation of metabolic process	biological_process	19	19/ 324	GENE_011130;GENE_003845;GENE_017136;GENE_021548;GENE_022438;GENE_006621;GENE_022808;GENE_026028;GENE_025096;GENE_008046;GENE_006483;GENE_006910;GENE_025982;GENE_018714;GENE_004813;GENE_018366;GENE_004045;GENE_025728;GENE_011583
GO:0048583	regulation of response to stimulus	biological_process	4	4/ 324	GENE_021548;GENE_021521;GENE_025282;GENE_020363
GO:0050793	regulation of developmental process	biological_process	1	1/ 324	GENE_010933
GO:0050794	regulation of cellular process	biological_process	39	39/ 324	GENE_023161;GENE_011411;GENE_026214;GENE_006831;GENE_022808;GENE_025096;GENE_020363;GENE_025982;GENE_026028;GENE_025728;GENE_011583;GENE_021521;GENE_026221;GENE_003845;GENE_018366;GENE_016036;GENE_016527;GENE_008046;GENE_006483;GENE_004813;GENE_016039;GENE_011130;GENE_010225;GENE_010226;GENE_018852;GENE_024213;GENE_018714;GENE_004045;GENE_025593;GENE_006703;GENE_016846;GENE_006621;GENE_021548;GEN…
GO:0048518	positive regulation of biological process	biological_process	4	4/ 324	GENE_018714;GENE_006621;GENE_008046;GENE_006910
GO:0048519	negative regulation of biological process	biological_process	3	3/ 324	GENE_021548;GENE_017136;GENE_006910
GO:0023051	regulation of signaling	biological_process	3	3/ 324	GENE_021548;GENE_021521;GENE_020363
GO:0010817	regulation of hormone levels	biological_process	3	3/ 324	GENE_011146;GENE_023955;GENE_011634
GO:1901564	organonitrogen compound metabolic process	biological_process	24	24/ 324	GENE_002357;GENE_022095;GENE_015793;GENE_020323;GENE_025277;GENE_022111;GENE_009329;GENE_021520;GENE_023955;GENE_008046;GENE_008978;GENE_022585;GENE_013432;GENE_019858;GENE_020901;GENE_011069;GENE_014530;GENE_024275;GENE_006986;GENE_001427;GENE_011634;GENE_024214;GENE_012424;GENE_016108
GO:0034641	cellular nitrogen compound metabolic process	biological_process	12	12/ 324	GENE_010773;GENE_015367;GENE_022972;GENE_024717;GENE_010933;GENE_008046;GENE_005240;GENE_011684;GENE_018714;GENE_016846;GENE_000960;GENE_010957
GO:0015942	formate metabolic process	biological_process	1	1/ 324	GENE_000495
GO:0043603	amide metabolic process	biological_process	2	2/ 324	GENE_015793;GENE_008046
GO:0044255	cellular lipid metabolic process	biological_process	4	4/ 324	GENE_020323;GENE_005564;GENE_011146;GENE_020149
GO:0046483	heterocycle metabolic process	biological_process	13	13/ 324	GENE_010773;GENE_015367;GENE_022972;GENE_024717;GENE_010933;GENE_023955;GENE_005240;GENE_011684;GENE_018714;GENE_011634;GENE_016846;GENE_000960;GENE_010957
GO:0072593	reactive oxygen species metabolic process	biological_process	2	2/ 324	GENE_021935;GENE_024822
GO:0006790	sulfur compound metabolic process	biological_process	1	1/ 324	GENE_020901
GO:0006793	phosphorus metabolic process	biological_process	27	27/ 324	GENE_003608;GENE_011411;GENE_003886;GENE_000268;GENE_011895;GENE_020323;GENE_001717;GENE_006732;GENE_016527;GENE_016290;GENE_015254;GENE_013432;GENE_019858;GENE_010225;GENE_004182;GENE_003225;GENE_018852;GENE_015562;GENE_008945;GENE_005463;GENE_025938;GENE_009011;GENE_011712;GENE_012448;GENE_015015;GENE_009833;GENE_015855
GO:0006082	organic acid metabolic process	biological_process	7	7/ 324	GENE_020149;GENE_020901;GENE_011146;GENE_008895;GENE_014530;GENE_015793;GENE_000495
GO:0044248	cellular catabolic process	biological_process	6	6/ 324	GENE_021935;GENE_005841;GENE_024822;GENE_015793;GENE_005821;GENE_000495
GO:0044249	cellular biosynthetic process	biological_process	14	14/ 324	GENE_010773;GENE_020149;GENE_020901;GENE_023955;GENE_012654;GENE_014580;GENE_010933;GENE_008046;GENE_011634;GENE_014661;GENE_018714;GENE_005564;GENE_016846;GENE_000960
GO:0009850	auxin metabolic process	biological_process	1	1/ 324	GENE_011146
GO:0006725	cellular aromatic compound metabolic process	biological_process	17	17/ 324	GENE_010773;GENE_012654;GENE_015367;GENE_022972;GENE_024717;GENE_010933;GENE_023955;GENE_005841;GENE_014580;GENE_005240;GENE_011684;GENE_018714;GENE_011634;GENE_005821;GENE_016846;GENE_000960;GENE_010957
GO:0006575	cellular modified amino acid metabolic process	biological_process	1	1/ 324	GENE_020901
GO:0044550	secondary metabolite biosynthetic process	biological_process	2	2/ 324	GENE_014580;GENE_012654
GO:0044283	small molecule biosynthetic process	biological_process	2	2/ 324	GENE_020901;GENE_020149
GO:0042446	hormone biosynthetic process	biological_process	2	2/ 324	GENE_023955;GENE_011634
GO:1901576	organic substance biosynthetic process	biological_process	14	14/ 324	GENE_010773;GENE_009696;GENE_020149;GENE_020901;GENE_015612;GENE_012654;GENE_014580;GENE_010933;GENE_008046;GENE_014661;GENE_018714;GENE_005564;GENE_016846;GENE_000960
GO:0044282	small molecule catabolic process	biological_process	2	2/ 324	GENE_015793;GENE_000495
GO:1901575	organic substance catabolic process	biological_process	20	20/ 324	GENE_019858;GENE_013432;GENE_024577;GENE_009959;GENE_013503;GENE_005841;GENE_013474;GENE_012424;GENE_021972;GENE_024822;GENE_021935;GENE_013836;GENE_013875;GENE_005821;GENE_015793;GENE_020323;GENE_016697;GENE_024717;GENE_001255;GENE_000495
GO:0006629	lipid metabolic process	biological_process	11	11/ 324	GENE_013474;GENE_009696;GENE_020149;GENE_024577;GENE_009959;GENE_013503;GENE_011146;GENE_021972;GENE_005564;GENE_020323;GENE_024717
GO:0006139	nucleobase-containing compound metabolic process	biological_process	11	11/ 324	GENE_010773;GENE_015367;GENE_022972;GENE_024717;GENE_010933;GENE_005240;GENE_011684;GENE_018714;GENE_016846;GENE_000960;GENE_010957
GO:0005975	carbohydrate metabolic process	biological_process	11	11/ 324	GENE_006563;GENE_014661;GENE_013432;GENE_001626;GENE_025725;GENE_013875;GENE_013836;GENE_005833;GENE_016697;GENE_001255;GENE_005942
GO:0019538	protein metabolic process	biological_process	16	16/ 324	GENE_002357;GENE_019858;GENE_022111;GENE_009329;GENE_021520;GENE_022095;GENE_011069;GENE_008046;GENE_024275;GENE_012424;GENE_008978;GENE_001427;GENE_025277;GENE_006986;GENE_024214;GENE_016108
GO:0006520	amino acid metabolic process	biological_process	3	3/ 324	GENE_015793;GENE_020901;GENE_014530
GO:0019637	organophosphate metabolic process	biological_process	1	1/ 324	GENE_020323
GO:1901135	carbohydrate derivative metabolic process	biological_process	1	1/ 324	GENE_013432
GO:1901615	organic hydroxy compound metabolic process	biological_process	2	2/ 324	GENE_008895;GENE_020149
GO:1901360	organic cyclic compound metabolic process	biological_process	17	17/ 324	GENE_010773;GENE_015367;GENE_022972;GENE_024717;GENE_020149;GENE_005841;GENE_014580;GENE_010933;GENE_010957;GENE_005240;GENE_011684;GENE_018714;GENE_005821;GENE_012654;GENE_016846;GENE_000960;GENE_009696
GO:0042743	hydrogen peroxide metabolic process	biological_process	2	2/ 324	GENE_021935;GENE_024822
GO:0043170	macromolecule metabolic process	biological_process	32	32/ 324	GENE_015367;GENE_022095;GENE_014661;GENE_019858;GENE_025277;GENE_011069;GENE_016697;GENE_022111;GENE_009329;GENE_021520;GENE_008046;GENE_024275;GENE_024214;GENE_010773;GENE_002357;GENE_022972;GENE_011684;GENE_013875;GENE_005240;GENE_008978;GENE_018714;GENE_024717;GENE_013836;GENE_006986;GENE_010957;GENE_010933;GENE_001427;GENE_013432;GENE_012424;GENE_016846;GENE_000960;GENE_016108
GO:0009690	cytokinin metabolic process	biological_process	2	2/ 324	GENE_023955;GENE_011634
GO:0009698	phenylpropanoid metabolic process	biological_process	4	4/ 324	GENE_014580;GENE_005821;GENE_012654;GENE_005841
GO:0048833	specification of floral organ number	biological_process	1	1/ 324	GENE_010933
GO:0009793	embryo development ending in seed dormancy	biological_process	1	1/ 324	GENE_021438
GO:0048437	floral organ development	biological_process	1	1/ 324	GENE_010933
GO:0032940	secretion by cell	biological_process	1	1/ 324	GENE_020515
GO:0031668	cellular response to extracellular stimulus	biological_process	1	1/ 324	GENE_000091
GO:1903047	mitotic cell cycle process	biological_process	2	2/ 324	GENE_006999;GENE_014661
GO:0044770	cell cycle phase transition	biological_process	1	1/ 324	GENE_006999
GO:0061077	chaperone-mediated protein folding	biological_process	1	1/ 324	GENE_021042
GO:0006458	'de novo' protein folding	biological_process	1	1/ 324	GENE_021042
GO:0042026	protein refolding	biological_process	1	1/ 324	GENE_021042
GO:0070727	cellular macromolecule localization	biological_process	1	1/ 324	GENE_020515
GO:0006887	exocytosis	biological_process	1	1/ 324	GENE_020515
GO:0044085	cellular component biogenesis	biological_process	1	1/ 324	GENE_014661
GO:0016043	cellular component organization	biological_process	5	5/ 324	GENE_023833;GENE_013875;GENE_018154;GENE_013836;GENE_006910
GO:0042546	cell wall biogenesis	biological_process	1	1/ 324	GENE_014661
GO:0071555	cell wall organization	biological_process	4	4/ 324	GENE_023833;GENE_013875;GENE_013836;GENE_018154
GO:0071669	plant-type cell wall organization or biogenesis	biological_process	3	3/ 324	GENE_023833;GENE_014661;GENE_018154
GO:0033554	cellular response to stress	biological_process	4	4/ 324	GENE_019858;GENE_004813;GENE_005240;GENE_000091
GO:0007166	cell surface receptor signaling pathway	biological_process	2	2/ 324	GENE_018852;GENE_010225
GO:0009755	hormone-mediated signaling pathway	biological_process	10	10/ 324	GENE_023161;GENE_011411;GENE_010226;GENE_006703;GENE_011634;GENE_006483;GENE_020270;GENE_024213;GENE_016846;GENE_025593
GO:0035556	intracellular signal transduction	biological_process	2	2/ 324	GENE_016846;GENE_011411
GO:0098869	cellular oxidant detoxification	biological_process	1	1/ 324	GENE_017342
GO:0030154	cell differentiation	biological_process	2	2/ 324	GENE_022808;GENE_026028
GO:1903825	organic acid transmembrane transport	biological_process	1	1/ 324	GENE_024213
GO:0098660	inorganic ion transmembrane transport	biological_process	1	1/ 324	GENE_023148
GO:0048544	recognition of pollen	biological_process	1	1/ 324	GENE_016290
GO:0019827	stem cell population maintenance	biological_process	1	1/ 324	GENE_010933
GO:0048859	formation of anatomical boundary	biological_process	1	1/ 324	GENE_010933
GO:0090698	post-embryonic plant morphogenesis	biological_process	1	1/ 324	GENE_010933
GO:0048731	system development	biological_process	1	1/ 324	GENE_024086
GO:0007275	multicellular organism development	biological_process	1	1/ 324	GENE_021438
GO:0099402	plant organ development	biological_process	2	2/ 324	GENE_024086;GENE_010933
GO:0010150	leaf senescence	biological_process	1	1/ 324	GENE_002321
GO:0010074	maintenance of meristem identity	biological_process	1	1/ 324	GENE_010933
GO:0009790	embryo development	biological_process	1	1/ 324	GENE_021438
GO:0003002	regionalization	biological_process	1	1/ 324	GENE_010933
GO:0009620	response to fungus	biological_process	3	3/ 324	GENE_020032;GENE_018135;GENE_022095
GO:0098542	defense response to other organism	biological_process	3	3/ 324	GENE_020032;GENE_018135;GENE_010371
GO:0009608	response to symbiont	biological_process	1	1/ 324	GENE_022095
GO:0045184	establishment of protein localization	biological_process	1	1/ 324	GENE_020515
GO:0006810	transport	biological_process	16	16/ 324	GENE_023316;GENE_010055;GENE_010314;GENE_000091;GENE_000724;GENE_007951;GENE_026025;GENE_006703;GENE_014552;GENE_013141;GENE_023100;GENE_020515;GENE_004292;GENE_024213;GENE_019783;GENE_023148
GO:0043207	response to external biotic stimulus	biological_process	6	6/ 324	GENE_011712;GENE_022095;GENE_020032;GENE_018135;GENE_010371;GENE_017924
GO:0009991	response to extracellular stimulus	biological_process	1	1/ 324	GENE_000091
GO:0071496	cellular response to external stimulus	biological_process	1	1/ 324	GENE_000091
GO:0009725	response to hormone	biological_process	2	2/ 324	GENE_025030;GENE_001058
GO:0009611	response to wounding	biological_process	2	2/ 324	GENE_021521;GENE_020363
GO:0042594	response to starvation	biological_process	1	1/ 324	GENE_000091
GO:0009409	response to cold	biological_process	1	1/ 324	GENE_001058
GO:0009408	response to heat	biological_process	1	1/ 324	GENE_004813
GO:0006952	defense response	biological_process	14	14/ 324	GENE_008798;GENE_020870;GENE_016036;GENE_026214;GENE_006831;GENE_026221;GENE_020032;GENE_018135;GENE_024400;GENE_022059;GENE_016039;GENE_010371;GENE_001274;GENE_017924
GO:0006979	response to oxidative stress	biological_process	2	2/ 324	GENE_021935;GENE_024822
GO:0009414	response to water deprivation	biological_process	1	1/ 324	GENE_001058
GO:1901700	response to oxygen-containing compound	biological_process	2	2/ 324	GENE_025030;GENE_001058
GO:1902074	response to salt	biological_process	1	1/ 324	GENE_001058
GO:1901698	response to nitrogen compound	biological_process	1	1/ 324	GENE_019858
GO:0001101	response to acid chemical	biological_process	1	1/ 324	GENE_001058
GO:0010035	response to inorganic substance	biological_process	1	1/ 324	GENE_001058
GO:0010033	response to organic substance	biological_process	3	3/ 324	GENE_025030;GENE_019858;GENE_001058
GO:0009266	response to temperature stimulus	biological_process	2	2/ 324	GENE_004813;GENE_001058
GO:0009314	response to radiation	biological_process	1	1/ 324	GENE_010933
GO:0009415	response to water	biological_process	1	1/ 324	GENE_001058
GO:0000145	exocyst	cellular_component	1	1/ 324	GENE_020515
GO:0043233	organelle lumen	cellular_component	1	1/ 324	GENE_008046
GO:0043229	intracellular organelle	cellular_component	45	45/ 324	GENE_023161;GENE_011411;GENE_025282;GENE_010489;GENE_020363;GENE_025725;GENE_025096;GENE_020529;GENE_019805;GENE_025982;GENE_015793;GENE_026028;GENE_015397;GENE_021521;GENE_022972;GENE_018366;GENE_023955;GENE_006483;GENE_006910;GENE_005833;GENE_004813;GENE_012623;GENE_010773;GENE_011130;GENE_000091;GENE_011684;GENE_023074;GENE_022808;GENE_008786;GENE_012424;GENE_005240;GENE_018714;GENE_004045;GEN…
GO:0043228	non-membrane-bounded organelle	cellular_component	1	1/ 324	GENE_005240
GO:0043227	membrane-bounded organelle	cellular_component	45	45/ 324	GENE_023161;GENE_011411;GENE_025282;GENE_010489;GENE_020363;GENE_025725;GENE_025096;GENE_020529;GENE_019805;GENE_025982;GENE_015793;GENE_026028;GENE_015397;GENE_021521;GENE_022972;GENE_018366;GENE_023955;GENE_006483;GENE_006910;GENE_005833;GENE_004813;GENE_012623;GENE_010773;GENE_011130;GENE_000091;GENE_011684;GENE_023074;GENE_022808;GENE_008786;GENE_012424;GENE_005240;GENE_018714;GENE_004045;GEN…
GO:0031090	organelle membrane	cellular_component	5	5/ 324	GENE_014552;GENE_015049;GENE_008046;GENE_019858;GENE_023513
GO:0005886	plasma membrane	cellular_component	18	18/ 324	GENE_023161;GENE_020032;GENE_014792;GENE_008859;GENE_014691;GENE_014856;GENE_010226;GENE_000091;GENE_009011;GENE_023148;GENE_025224;GENE_000966;GENE_020270;GENE_014661;GENE_005833;GENE_014371;GENE_016847;GENE_014425
GO:0031012	extracellular matrix	cellular_component	1	1/ 324	GENE_025593
GO:0005618	cell wall	cellular_component	1	1/ 324	GENE_024822
GO:0070161	anchoring junction	cellular_component	1	1/ 324	GENE_006563
GO:0098791	Golgi apparatus subcompartment	cellular_component	1	1/ 324	GENE_000091
GO:0048046	apoplast	cellular_component	6	6/ 324	GENE_005841;GENE_014580;GENE_024049;GENE_005821;GENE_024040;GENE_025593
GO:0099081	supramolecular polymer	cellular_component	1	1/ 324	GENE_009833
GO:0000981	DNA-binding transcription factor activity, RNA polymerase II-specific	molecular_function	1	1/ 324	GENE_015397
GO:0140359	ABC-type transporter activity	molecular_function	3	3/ 324	GENE_000724;GENE_017389;GENE_004292
GO:0140358	P-type transmembrane transporter activity	molecular_function	1	1/ 324	GENE_002189
GO:0019829	ATPase-coupled monoatomic cation transmembrane transporter activity	molecular_function	1	1/ 324	GENE_002189
GO:0140825	lactoperoxidase activity	molecular_function	2	2/ 324	GENE_021935;GENE_024822
GO:0042887	amide transmembrane transporter activity	molecular_function	2	2/ 324	GENE_007951;GENE_016829
GO:0015605	organophosphate ester transmembrane transporter activity	molecular_function	1	1/ 324	GENE_023513
GO:1901702	salt transmembrane transporter activity	molecular_function	2	2/ 324	GENE_009273;GENE_002189
GO:0008514	organic anion transmembrane transporter activity	molecular_function	2	2/ 324	GENE_024213;GENE_023513
GO:0005342	organic acid transmembrane transporter activity	molecular_function	2	2/ 324	GENE_024213;GENE_023513
GO:0015144	carbohydrate transmembrane transporter activity	molecular_function	1	1/ 324	GENE_005833
GO:0022803	passive transmembrane transporter activity	molecular_function	4	4/ 324	GENE_015397;GENE_015367;GENE_022568;GENE_023148
GO:0022804	active transmembrane transporter activity	molecular_function	8	8/ 324	GENE_006703;GENE_000724;GENE_015049;GENE_017389;GENE_004292;GENE_005833;GENE_024213;GENE_002189
GO:0015075	monoatomic ion transmembrane transporter activity	molecular_function	5	5/ 324	GENE_005833;GENE_015397;GENE_015049;GENE_009273;GENE_002189
GO:0015203	polyamine transmembrane transporter activity	molecular_function	1	1/ 324	GENE_025970
GO:0015318	inorganic molecular entity transmembrane transporter activity	molecular_function	7	7/ 324	GENE_015367;GENE_009273;GENE_023148;GENE_015049;GENE_000091;GENE_005833;GENE_002189
GO:0008047	enzyme activator activity	molecular_function	2	2/ 324	GENE_016527;GENE_001427
GO:0004857	enzyme inhibitor activity	molecular_function	5	5/ 324	GENE_023161;GENE_013875;GENE_013836;GENE_025312;GENE_012704
GO:0055106	ubiquitin-protein transferase regulator activity	molecular_function	1	1/ 324	GENE_001427
GO:0019207	kinase regulator activity	molecular_function	2	2/ 324	GENE_016527;GENE_006999
GO:0019208	phosphatase regulator activity	molecular_function	1	1/ 324	GENE_023161
GO:0003676	nucleic acid binding	molecular_function	30	30/ 324	GENE_015367;GENE_011451;GENE_010192;GENE_022808;GENE_005437;GENE_025096;GENE_025982;GENE_025728;GENE_011583;GENE_015397;GENE_024717;GENE_003845;GENE_026028;GENE_004813;GENE_012623;GENE_010773;GENE_022972;GENE_011684;GENE_023074;GENE_010489;GENE_005240;GENE_006358;GENE_018714;GENE_004045;GENE_017555;GENE_006621;GENE_025299;GENE_016846;GENE_000960;GENE_011163
GO:1901265	nucleoside phosphate binding	molecular_function	43	43/ 324	GENE_003608;GENE_016036;GENE_000724;GENE_003886;GENE_017389;GENE_000268;GENE_004208;GENE_015793;GENE_001717;GENE_014580;GENE_026221;GENE_015058;GENE_016527;GENE_008046;GENE_005609;GENE_016290;GENE_015254;GENE_017924;GENE_006831;GENE_010225;GENE_024111;GENE_004182;GENE_003225;GENE_018852;GENE_015562;GENE_005463;GENE_008463;GENE_021042;GENE_008798;GENE_013432;GENE_009011;GENE_025852;GENE_026214;GEN…
GO:0046906	tetrapyrrole binding	molecular_function	8	8/ 324	GENE_020149;GENE_012301;GENE_021935;GENE_012336;GENE_024822;GENE_005239;GENE_000407;GENE_004089
GO:0070279	vitamin B6 binding	molecular_function	1	1/ 324	GENE_014530
GO:0019899	enzyme binding	molecular_function	3	3/ 324	GENE_019858;GENE_011411;GENE_011712
GO:0005516	calmodulin binding	molecular_function	1	1/ 324	GENE_020870
GO:0031072	heat shock protein binding	molecular_function	1	1/ 324	GENE_021042
GO:0046983	protein dimerization activity	molecular_function	3	3/ 324	GENE_018714;GENE_010489;GENE_025982
GO:0008061	chitin binding	molecular_function	2	2/ 324	GENE_012945;GENE_013432
GO:0032553	ribonucleotide binding	molecular_function	37	37/ 324	GENE_003608;GENE_015058;GENE_003886;GENE_006831;GENE_000268;GENE_008798;GENE_001717;GENE_016036;GENE_026221;GENE_000724;GENE_016527;GENE_008046;GENE_005609;GENE_016290;GENE_015254;GENE_017924;GENE_017389;GENE_010225;GENE_004182;GENE_003225;GENE_018852;GENE_015562;GENE_005463;GENE_008463;GENE_021042;GENE_013432;GENE_009011;GENE_026214;GENE_011712;GENE_018135;GENE_012448;GENE_016039;GENE_004292;GEN…
GO:0043169	cation binding	molecular_function	51	51/ 324	GENE_015367;GENE_012301;GENE_023074;GENE_015612;GENE_010489;GENE_025883;GENE_024744;GENE_024049;GENE_024822;GENE_005239;GENE_006910;GENE_020323;GENE_024040;GENE_025549;GENE_001058;GENE_014810;GENE_016332;GENE_003595;GENE_014856;GENE_022111;GENE_020149;GENE_015397;GENE_025277;GENE_008801;GENE_005738;GENE_022878;GENE_021935;GENE_001294;GENE_022585;GENE_011130;GENE_019858;GENE_010225;GENE_010192;GEN…
GO:0043168	anion binding	molecular_function	46	46/ 324	GENE_023161;GENE_003608;GENE_016036;GENE_000724;GENE_003886;GENE_017389;GENE_000268;GENE_004208;GENE_001717;GENE_014580;GENE_026221;GENE_015058;GENE_016527;GENE_008046;GENE_005609;GENE_016290;GENE_015254;GENE_014530;GENE_017924;GENE_006831;GENE_010225;GENE_000091;GENE_024111;GENE_004182;GENE_006920;GENE_003225;GENE_020515;GENE_018852;GENE_015562;GENE_005463;GENE_008463;GENE_021042;GENE_008798;GEN…
GO:0005543	phospholipid binding	molecular_function	1	1/ 324	GENE_020515
GO:0005504	fatty acid binding	molecular_function	1	1/ 324	GENE_010371
GO:0019840	isoprenoid binding	molecular_function	1	1/ 324	GENE_023161
GO:0043177	organic acid binding	molecular_function	3	3/ 324	GENE_023161;GENE_006920;GENE_010371
GO:0043178	alcohol binding	molecular_function	2	2/ 324	GENE_023161;GENE_000091
GO:0019842	vitamin binding	molecular_function	1	1/ 324	GENE_014530
GO:0000166	nucleotide binding	molecular_function	43	43/ 324	GENE_003608;GENE_016036;GENE_000724;GENE_003886;GENE_017389;GENE_000268;GENE_004208;GENE_015793;GENE_001717;GENE_014580;GENE_026221;GENE_015058;GENE_016527;GENE_008046;GENE_005609;GENE_016290;GENE_015254;GENE_017924;GENE_006831;GENE_010225;GENE_024111;GENE_004182;GENE_003225;GENE_018852;GENE_015562;GENE_005463;GENE_008463;GENE_021042;GENE_008798;GENE_013432;GENE_009011;GENE_025852;GENE_026214;GEN…
GO:0030247	polysaccharide binding	molecular_function	4	4/ 324	GENE_000268;GENE_011633;GENE_018852;GENE_010225
GO:0010427	abscisic acid binding	molecular_function	1	1/ 324	GENE_023161
GO:0043021	ribonucleoprotein complex binding	molecular_function	1	1/ 324	GENE_008046
GO:0010997	anaphase-promoting complex binding	molecular_function	1	1/ 324	GENE_001427
GO:0016879	ligase activity, forming carbon-nitrogen bonds	molecular_function	1	1/ 324	GENE_006674
GO:0016835	carbon-oxygen lyase activity	molecular_function	1	1/ 324	GENE_001255
GO:1990404	NAD+-protein ADP-ribosyltransferase activity	molecular_function	1	1/ 324	GENE_005240
GO:0004721	phosphoprotein phosphatase activity	molecular_function	1	1/ 324	GENE_019990
GO:0019787	ubiquitin-like protein transferase activity	molecular_function	4	4/ 324	GENE_019858;GENE_025277;GENE_002357;GENE_006986
GO:0004672	protein kinase activity	molecular_function	22	22/ 324	GENE_003608;GENE_011411;GENE_003886;GENE_000268;GENE_001717;GENE_016527;GENE_016290;GENE_015254;GENE_013432;GENE_010225;GENE_004182;GENE_003225;GENE_018852;GENE_015562;GENE_005463;GENE_008463;GENE_009011;GENE_011712;GENE_012448;GENE_008945;GENE_009833;GENE_015855
GO:0140994	RNA polymerase II CTD heptapeptide repeat modifying activity	molecular_function	1	1/ 324	GENE_019990
GO:0008233	peptidase activity	molecular_function	7	7/ 324	GENE_022111;GENE_009329;GENE_021520;GENE_022095;GENE_024275;GENE_011069;GENE_008978
GO:0016798	hydrolase activity, acting on glycosyl bonds	molecular_function	7	7/ 324	GENE_006563;GENE_016697;GENE_001626;GENE_025725;GENE_023955;GENE_005942;GENE_013432
GO:0016810	hydrolase activity, acting on carbon-nitrogen (but not peptide) bonds	molecular_function	1	1/ 324	GENE_011146
GO:0016817	hydrolase activity, acting on acid anhydrides	molecular_function	9	9/ 324	GENE_000724;GENE_025852;GENE_017389;GENE_008046;GENE_005609;GENE_004292;GENE_008798;GENE_021042;GENE_002189
GO:0017171	serine hydrolase activity	molecular_function	2	2/ 324	GENE_024275;GENE_022095
GO:0016788	hydrolase activity, acting on ester bonds	molecular_function	15	15/ 324	GENE_016332;GENE_013474;GENE_017555;GENE_013875;GENE_024577;GENE_009959;GENE_013503;GENE_019990;GENE_003088;GENE_015397;GENE_021972;GENE_011451;GENE_020323;GENE_024717;GENE_013836
GO:0016614	oxidoreductase activity, acting on CH-OH group of donors	molecular_function	3	3/ 324	GENE_008895;GENE_009696;GENE_000495
GO:0016903	oxidoreductase activity, acting on the aldehyde or oxo group of donors	molecular_function	2	2/ 324	GENE_009696;GENE_000495
GO:0016675	oxidoreductase activity, acting on a heme group of donors	molecular_function	1	1/ 324	GENE_015049
GO:0016679	oxidoreductase activity, acting on diphenols and related substances as donors	molecular_function	2	2/ 324	GENE_005821;GENE_005841
GO:0051213	dioxygenase activity	molecular_function	3	3/ 324	GENE_008801;GENE_005597;GENE_014810
GO:0016229	steroid dehydrogenase activity	molecular_function	1	1/ 324	GENE_009696
GO:0009055	electron transfer activity	molecular_function	4	4/ 324	GENE_019011;GENE_015049;GENE_002465;GENE_009397
GO:0016705	oxidoreductase activity, acting on paired donors, with incorporation or reduction of molecular oxygen	molecular_function	8	8/ 324	GENE_020149;GENE_012301;GENE_015612;GENE_012336;GENE_005239;GENE_004208;GENE_000407;GENE_004089
GO:0016627	oxidoreductase activity, acting on the CH-CH group of donors	molecular_function	1	1/ 324	GENE_014580
GO:0016651	oxidoreductase activity, acting on NAD(P)H	molecular_function	1	1/ 324	GENE_014856
GO:0016684	oxidoreductase activity, acting on peroxide as acceptor	molecular_function	3	3/ 324	GENE_021935;GENE_024822;GENE_014856
GO:0004497	monooxygenase activity	molecular_function	8	8/ 324	GENE_020149;GENE_012301;GENE_024111;GENE_012336;GENE_005239;GENE_004208;GENE_000407;GENE_004089
GO:0016638	oxidoreductase activity, acting on the CH-NH2 group of donors	molecular_function	2	2/ 324	GENE_015793;GENE_022585
GO:0140098	catalytic activity, acting on RNA	molecular_function	4	4/ 324	GENE_015397;GENE_011451;GENE_024717;GENE_017555
GO:0140097	catalytic activity, acting on DNA	molecular_function	2	2/ 324	GENE_015397;GENE_015367
GO:0004386	helicase activity	molecular_function	3	3/ 324	GENE_015058;GENE_020235;GENE_006563
GO:0016765	transferase activity, transferring alkyl or aryl (other than methyl) groups	molecular_function	1	1/ 324	GENE_005564
GO:0016769	transferase activity, transferring nitrogenous groups	molecular_function	1	1/ 324	GENE_014530
GO:0016782	transferase activity, transferring sulphur-containing groups	molecular_function	2	2/ 324	GENE_025248;GENE_022254
GO:0016757	glycosyltransferase activity	molecular_function	5	5/ 324	GENE_025665;GENE_020055;GENE_005240;GENE_014661;GENE_023636
GO:0016772	transferase activity, transferring phosphorus-containing groups	molecular_function	31	31/ 324	GENE_003608;GENE_011411;GENE_003886;GENE_000268;GENE_011895;GENE_001717;GENE_006732;GENE_015367;GENE_015397;GENE_016527;GENE_016290;GENE_015254;GENE_013432;GENE_019858;GENE_010225;GENE_004182;GENE_006920;GENE_003225;GENE_005240;GENE_018852;GENE_015562;GENE_015015;GENE_005463;GENE_008463;GENE_025938;GENE_009011;GENE_011712;GENE_012448;GENE_008945;GENE_009833;GENE_015855
GO:0016741	transferase activity, transferring one-carbon groups	molecular_function	3	3/ 324	GENE_006572;GENE_020901;GENE_024994
GO:0016746	acyltransferase activity	molecular_function	7	7/ 324	GENE_019858;GENE_015397;GENE_012945;GENE_019805;GENE_002357;GENE_025277;GENE_006986
3. DK P.m 1DPI vs DK CK 1DPI
GO ID	Description	Term Type	DK P.m 1DPI vs DK CK 1DPI num	DK P.m 1DPI vs DK CK 1DPI percent	DK P.m 1DPI vs DK CK 1DPI Gene_ids
GO:0019222	regulation of metabolic process	biological_process	5	5/ 99	GENE_009036;GENE_000616;GENE_021533;GENE_004045;GENE_000228
GO:0050794	regulation of cellular process	biological_process	7	7/ 99	GENE_011411;GENE_000616;GENE_021533;GENE_009036;GENE_004045;GENE_016949;GENE_000228
GO:0031647	regulation of protein stability	biological_process	1	1/ 99	GENE_021378
GO:1901564	organonitrogen compound metabolic process	biological_process	13	13/ 99	GENE_009913;GENE_013203;GENE_016727;GENE_020965;GENE_015371;GENE_000979;GENE_005543;GENE_004693;GENE_011140;GENE_001253;GENE_002273;GENE_003406;GENE_020439
GO:0034641	cellular nitrogen compound metabolic process	biological_process	5	5/ 99	GENE_019987;GENE_004693;GENE_016515;GENE_017848;GENE_007423
GO:0044255	cellular lipid metabolic process	biological_process	2	2/ 99	GENE_018849;GENE_019330
GO:0006730	one-carbon metabolic process	biological_process	2	2/ 99	GENE_000338;GENE_020439
GO:0046483	heterocycle metabolic process	biological_process	7	7/ 99	GENE_004693;GENE_019987;GENE_016515;GENE_017848;GENE_026133;GENE_007423;GENE_020439
GO:0072593	reactive oxygen species metabolic process	biological_process	1	1/ 99	GENE_005863
GO:0006790	sulfur compound metabolic process	biological_process	3	3/ 99	GENE_000338;GENE_015371;GENE_020439
GO:0006793	phosphorus metabolic process	biological_process	8	8/ 99	GENE_020953;GENE_011411;GENE_022401;GENE_025643;GENE_009995;GENE_020817;GENE_019180;GENE_015642
GO:0006082	organic acid metabolic process	biological_process	10	10/ 99	GENE_019330;GENE_016727;GENE_020965;GENE_015371;GENE_026133;GENE_001253;GENE_002273;GENE_018849;GENE_003406;GENE_020439
GO:0044248	cellular catabolic process	biological_process	6	6/ 99	GENE_008937;GENE_016727;GENE_005863;GENE_005786;GENE_003406;GENE_002273
GO:0044249	cellular biosynthetic process	biological_process	11	11/ 99	GENE_000338;GENE_019330;GENE_016727;GENE_015371;GENE_007423;GENE_002273;GENE_026133;GENE_001253;GENE_014542;GENE_018849;GENE_020439
GO:0006725	cellular aromatic compound metabolic process	biological_process	11	11/ 99	GENE_005786;GENE_019987;GENE_016727;GENE_016515;GENE_004693;GENE_017848;GENE_001253;GENE_020439;GENE_007423;GENE_003406;GENE_002273
GO:0006575	cellular modified amino acid metabolic process	biological_process	1	1/ 99	GENE_020439
GO:0044550	secondary metabolite biosynthetic process	biological_process	2	2/ 99	GENE_016727;GENE_002273
GO:0044283	small molecule biosynthetic process	biological_process	8	8/ 99	GENE_019330;GENE_016727;GENE_015371;GENE_026133;GENE_001253;GENE_002273;GENE_018849;GENE_020439
GO:1901576	organic substance biosynthetic process	biological_process	12	12/ 99	GENE_000338;GENE_019330;GENE_016727;GENE_015371;GENE_007423;GENE_002273;GENE_026133;GENE_001461;GENE_001253;GENE_014542;GENE_018849;GENE_020439
GO:0044282	small molecule catabolic process	biological_process	3	3/ 99	GENE_016727;GENE_003406;GENE_002273
GO:1901575	organic substance catabolic process	biological_process	7	7/ 99	GENE_013203;GENE_016727;GENE_021972;GENE_005863;GENE_005786;GENE_003406;GENE_002273
GO:0006766	vitamin metabolic process	biological_process	1	1/ 99	GENE_026133
GO:0005996	monosaccharide metabolic process	biological_process	1	1/ 99	GENE_026133
GO:0043414	macromolecule methylation	biological_process	1	1/ 99	GENE_016515
GO:0006629	lipid metabolic process	biological_process	3	3/ 99	GENE_021972;GENE_018849;GENE_019330
GO:0006139	nucleobase-containing compound metabolic process	biological_process	5	5/ 99	GENE_019987;GENE_004693;GENE_016515;GENE_017848;GENE_007423
GO:0005975	carbohydrate metabolic process	biological_process	4	4/ 99	GENE_013534;GENE_023393;GENE_026133;GENE_014542
GO:0019538	protein metabolic process	biological_process	6	6/ 99	GENE_004693;GENE_013203;GENE_000979;GENE_011140;GENE_005543;GENE_009913
GO:0006520	amino acid metabolic process	biological_process	7	7/ 99	GENE_016727;GENE_020965;GENE_015371;GENE_001253;GENE_020439;GENE_003406;GENE_002273
GO:0120254	olefinic compound metabolic process	biological_process	2	2/ 99	GENE_016727;GENE_002273
GO:0009812	flavonoid metabolic process	biological_process	1	1/ 99	GENE_001461
GO:1901360	organic cyclic compound metabolic process	biological_process	12	12/ 99	GENE_005786;GENE_019987;GENE_016727;GENE_016515;GENE_004693;GENE_017848;GENE_026133;GENE_001253;GENE_020439;GENE_007423;GENE_003406;GENE_002273
GO:0042743	hydrogen peroxide metabolic process	biological_process	1	1/ 99	GENE_005863
GO:0043170	macromolecule metabolic process	biological_process	12	12/ 99	GENE_004693;GENE_013203;GENE_019987;GENE_013534;GENE_016515;GENE_000979;GENE_017848;GENE_011140;GENE_005543;GENE_009913;GENE_007423;GENE_014542
GO:0046500	S-adenosylmethionine metabolic process	biological_process	1	1/ 99	GENE_000338
GO:0046283	anthocyanin-containing compound metabolic process	biological_process	1	1/ 99	GENE_001461
GO:0046148	pigment biosynthetic process	biological_process	1	1/ 99	GENE_001461
GO:0009698	phenylpropanoid metabolic process	biological_process	3	3/ 99	GENE_016727;GENE_005786;GENE_002273
GO:0048608	reproductive structure development	biological_process	1	1/ 99	GENE_019330
GO:0006914	autophagy	biological_process	1	1/ 99	GENE_008937
GO:0022417	protein maturation by protein folding	biological_process	1	1/ 99	GENE_011140
GO:0070727	cellular macromolecule localization	biological_process	2	2/ 99	GENE_023523;GENE_011140
GO:0046907	intracellular transport	biological_process	1	1/ 99	GENE_011140
GO:0044085	cellular component biogenesis	biological_process	1	1/ 99	GENE_013534
GO:0016043	cellular component organization	biological_process	2	2/ 99	GENE_013534;GENE_018403
GO:0042546	cell wall biogenesis	biological_process	1	1/ 99	GENE_013534
GO:0071555	cell wall organization	biological_process	1	1/ 99	GENE_013534
GO:0009826	unidimensional cell growth	biological_process	1	1/ 99	GENE_019330
GO:0009755	hormone-mediated signaling pathway	biological_process	3	3/ 99	GENE_016949;GENE_011411;GENE_000228
GO:0035556	intracellular signal transduction	biological_process	1	1/ 99	GENE_011411
GO:0001709	cell fate determination	biological_process	1	1/ 99	GENE_016963
GO:0071806	protein transmembrane transport	biological_process	1	1/ 99	GENE_011140
GO:1903825	organic acid transmembrane transport	biological_process	1	1/ 99	GENE_016949
GO:0000902	cell morphogenesis	biological_process	1	1/ 99	GENE_019330
GO:0048731	system development	biological_process	1	1/ 99	GENE_019330
GO:0090567	reproductive shoot system development	biological_process	1	1/ 99	GENE_019330
GO:0009617	response to bacterium	biological_process	1	1/ 99	GENE_009995
GO:0009620	response to fungus	biological_process	2	2/ 99	GENE_000979;GENE_005543
GO:0098542	defense response to other organism	biological_process	1	1/ 99	GENE_009995
GO:0009608	response to symbiont	biological_process	2	2/ 99	GENE_000979;GENE_005543
GO:0002239	response to oomycetes	biological_process	1	1/ 99	GENE_009995
GO:0060560	developmental growth involved in morphogenesis	biological_process	1	1/ 99	GENE_019330
GO:0045184	establishment of protein localization	biological_process	2	2/ 99	GENE_023523;GENE_011140
GO:0051649	establishment of localization in cell	biological_process	1	1/ 99	GENE_011140
GO:0006810	transport	biological_process	6	6/ 99	GENE_018403;GENE_023523;GENE_011140;GENE_011504;GENE_009976;GENE_016949
GO:0043207	response to external biotic stimulus	biological_process	4	4/ 99	GENE_000979;GENE_009995;GENE_005543;GENE_004302
GO:0006952	defense response	biological_process	4	4/ 99	GENE_009995;GENE_019180;GENE_004302;GENE_020870
GO:0006979	response to oxidative stress	biological_process	1	1/ 99	GENE_005863
GO:0009314	response to radiation	biological_process	1	1/ 99	GENE_019330
GO:1990234	transferase complex	cellular_component	1	1/ 99	GENE_016515
GO:0043233	organelle lumen	cellular_component	1	1/ 99	GENE_011140
GO:0043229	intracellular organelle	cellular_component	14	14/ 99	GENE_008937;GENE_013203;GENE_011411;GENE_021378;GENE_000228;GENE_021533;GENE_009036;GENE_025707;GENE_001253;GENE_017678;GENE_004045;GENE_007423;GENE_004212;GENE_012027
GO:0043227	membrane-bounded organelle	cellular_component	14	14/ 99	GENE_008937;GENE_013203;GENE_011411;GENE_021378;GENE_000228;GENE_021533;GENE_009036;GENE_025707;GENE_001253;GENE_017678;GENE_004045;GENE_007423;GENE_004212;GENE_012027
GO:0005886	plasma membrane	cellular_component	6	6/ 99	GENE_012380;GENE_003471;GENE_009995;GENE_023112;GENE_011508;GENE_011033
GO:0070161	anchoring junction	cellular_component	2	2/ 99	GENE_019672;GENE_023580
GO:0048046	apoplast	cellular_component	2	2/ 99	GENE_013534;GENE_005786
GO:0099081	supramolecular polymer	cellular_component	1	1/ 99	GENE_008937
GO:0140359	ABC-type transporter activity	molecular_function	2	2/ 99	GENE_014590;GENE_001896
GO:0140825	lactoperoxidase activity	molecular_function	1	1/ 99	GENE_005863
GO:0005548	phospholipid transporter activity	molecular_function	1	1/ 99	GENE_018403
GO:0120013	lipid transfer activity	molecular_function	1	1/ 99	GENE_018403
GO:0046624	sphingolipid transporter activity	molecular_function	1	1/ 99	GENE_018403
GO:0042887	amide transmembrane transporter activity	molecular_function	2	2/ 99	GENE_023523;GENE_009976
GO:0008514	organic anion transmembrane transporter activity	molecular_function	1	1/ 99	GENE_016949
GO:0005342	organic acid transmembrane transporter activity	molecular_function	1	1/ 99	GENE_016949
GO:0015144	carbohydrate transmembrane transporter activity	molecular_function	1	1/ 99	GENE_024069
GO:0022804	active transmembrane transporter activity	molecular_function	4	4/ 99	GENE_016949;GENE_024069;GENE_014590;GENE_001896
GO:0015075	monoatomic ion transmembrane transporter activity	molecular_function	1	1/ 99	GENE_024069
GO:0015318	inorganic molecular entity transmembrane transporter activity	molecular_function	1	1/ 99	GENE_024069
GO:0000774	adenyl-nucleotide exchange factor activity	molecular_function	1	1/ 99	GENE_021378
GO:0003676	nucleic acid binding	molecular_function	16	16/ 99	GENE_004693;GENE_016515;GENE_019987;GENE_009036;GENE_013330;GENE_019798;GENE_022867;GENE_025707;GENE_017848;GENE_021022;GENE_021533;GENE_015879;GENE_004045;GENE_007423;GENE_004212;GENE_019299
GO:1901265	nucleoside phosphate binding	molecular_function	16	16/ 99	GENE_014590;GENE_020953;GENE_016250;GENE_025643;GENE_021378;GENE_001896;GENE_022401;GENE_024620;GENE_009995;GENE_000338;GENE_004302;GENE_026133;GENE_020817;GENE_019180;GENE_015642;GENE_020439
GO:0046906	tetrapyrrole binding	molecular_function	3	3/ 99	GENE_005863;GENE_016777;GENE_019299
GO:0070279	vitamin B6 binding	molecular_function	1	1/ 99	GENE_003406
GO:0019899	enzyme binding	molecular_function	1	1/ 99	GENE_011411
GO:0051087	protein-folding chaperone binding	molecular_function	1	1/ 99	GENE_021378
GO:0005516	calmodulin binding	molecular_function	1	1/ 99	GENE_020870
GO:0032553	ribonucleotide binding	molecular_function	11	11/ 99	GENE_020953;GENE_000338;GENE_025643;GENE_001896;GENE_022401;GENE_009995;GENE_004302;GENE_014590;GENE_020817;GENE_019180;GENE_015642
GO:0097001	ceramide binding	molecular_function	1	1/ 99	GENE_018403
GO:0043169	cation binding	molecular_function	16	16/ 99	GENE_019987;GENE_000338;GENE_019330;GENE_017848;GENE_005863;GENE_016515;GENE_015371;GENE_005786;GENE_016719;GENE_025707;GENE_004212;GENE_016777;GENE_011504;GENE_015879;GENE_016831;GENE_019299
GO:0043168	anion binding	molecular_function	17	17/ 99	GENE_014590;GENE_020953;GENE_016250;GENE_025643;GENE_001896;GENE_022401;GENE_018403;GENE_024620;GENE_009995;GENE_000338;GENE_004302;GENE_026133;GENE_020817;GENE_019180;GENE_015642;GENE_003406;GENE_020439
GO:0005543	phospholipid binding	molecular_function	1	1/ 99	GENE_018403
GO:0046625	sphingolipid binding	molecular_function	1	1/ 99	GENE_018403
GO:0019842	vitamin binding	molecular_function	1	1/ 99	GENE_003406
GO:0000166	nucleotide binding	molecular_function	16	16/ 99	GENE_014590;GENE_020953;GENE_016250;GENE_025643;GENE_021378;GENE_001896;GENE_022401;GENE_024620;GENE_009995;GENE_000338;GENE_004302;GENE_026133;GENE_020817;GENE_019180;GENE_015642;GENE_020439
GO:0004888	transmembrane signaling receptor activity	molecular_function	1	1/ 99	GENE_009995
GO:0016877	ligase activity, forming carbon-sulfur bonds	molecular_function	1	1/ 99	GENE_022473
GO:0016840	carbon-nitrogen lyase activity	molecular_function	2	2/ 99	GENE_016727;GENE_002273
GO:0015035	protein-disulfide reductase activity	molecular_function	1	1/ 99	GENE_011140
GO:0008276	protein methyltransferase activity	molecular_function	1	1/ 99	GENE_016515
GO:0004672	protein kinase activity	molecular_function	8	8/ 99	GENE_020953;GENE_011411;GENE_022401;GENE_025643;GENE_009995;GENE_020817;GENE_019180;GENE_015642
GO:0008233	peptidase activity	molecular_function	3	3/ 99	GENE_000979;GENE_005543;GENE_004693
GO:0016798	hydrolase activity, acting on glycosyl bonds	molecular_function	2	2/ 99	GENE_013534;GENE_023393
GO:0016817	hydrolase activity, acting on acid anhydrides	molecular_function	3	3/ 99	GENE_019180;GENE_014590;GENE_001896
GO:0017171	serine hydrolase activity	molecular_function	2	2/ 99	GENE_000979;GENE_005543
GO:0016788	hydrolase activity, acting on ester bonds	molecular_function	8	8/ 99	GENE_020953;GENE_013330;GENE_019798;GENE_022867;GENE_021972;GENE_025707;GENE_021022;GENE_019299
GO:0016614	oxidoreductase activity, acting on CH-OH group of donors	molecular_function	3	3/ 99	GENE_021369;GENE_001461;GENE_026133
GO:0016679	oxidoreductase activity, acting on diphenols and related substances as donors	molecular_function	1	1/ 99	GENE_005786
GO:0016645	oxidoreductase activity, acting on the CH-NH group of donors	molecular_function	1	1/ 99	GENE_020439
GO:0051213	dioxygenase activity	molecular_function	1	1/ 99	GENE_019330
GO:0009055	electron transfer activity	molecular_function	1	1/ 99	GENE_009397
GO:0016705	oxidoreductase activity, acting on paired donors, with incorporation or reduction of molecular oxygen	molecular_function	3	3/ 99	GENE_016777;GENE_019330;GENE_019299
GO:0016627	oxidoreductase activity, acting on the CH-CH group of donors	molecular_function	1	1/ 99	GENE_006017
GO:0016684	oxidoreductase activity, acting on peroxide as acceptor	molecular_function	1	1/ 99	GENE_005863
GO:0004497	monooxygenase activity	molecular_function	3	3/ 99	GENE_016777;GENE_016250;GENE_019299
GO:0016667	oxidoreductase activity, acting on a sulfur group of donors	molecular_function	1	1/ 99	GENE_011140
GO:0140098	catalytic activity, acting on RNA	molecular_function	5	5/ 99	GENE_021022;GENE_022867;GENE_019798;GENE_019299;GENE_013330
GO:0140097	catalytic activity, acting on DNA	molecular_function	1	1/ 99	GENE_004693
GO:0016765	transferase activity, transferring alkyl or aryl (other than methyl) groups	molecular_function	2	2/ 99	GENE_001253;GENE_000338
GO:0016769	transferase activity, transferring nitrogenous groups	molecular_function	1	1/ 99	GENE_003406
GO:0016757	glycosyltransferase activity	molecular_function	5	5/ 99	GENE_013534;GENE_017678;GENE_012027;GENE_019943;GENE_014542
GO:0016772	transferase activity, transferring phosphorus-containing groups	molecular_function	9	9/ 99	GENE_020953;GENE_004693;GENE_011411;GENE_022401;GENE_025643;GENE_009995;GENE_020817;GENE_019180;GENE_015642
GO:0016741	transferase activity, transferring one-carbon groups	molecular_function	4	4/ 99	GENE_015371;GENE_011576;GENE_004212;GENE_016515
GO:0016746	acyltransferase activity	molecular_function	3	3/ 99	GENE_016515;GENE_018849;GENE_020286
4. DK P.m 5DPI vs DK CK 5DPI
GO ID	Description	Term Type	DK P.m 5DPI vs DK CK 5DPI num	DK P.m 5DPI vs DK CK 5DPI percent	DK P.m 5DPI vs DK CK 5DPI Gene_ids
GO:0002757	immune response-activating signaling pathway	biological_process	2	2/ 3414	GENE_009674;GENE_009661
GO:0002218	activation of innate immune response	biological_process	2	2/ 3414	GENE_009674;GENE_009661
GO:0045087	innate immune response	biological_process	9	9/ 3414	GENE_001769;GENE_017275;GENE_011533;GENE_003213;GENE_021104;GENE_011260;GENE_016082;GENE_001586;GENE_005781
GO:0030641	regulation of cellular pH	biological_process	2	2/ 3414	GENE_022471;GENE_001298
GO:0019222	regulation of metabolic process	biological_process	168	168/ 3414	GENE_022808;GENE_025096;GENE_024381;GENE_012005;GENE_011977;GENE_009921;GENE_019557;GENE_022554;GENE_016729;GENE_016135;GENE_015297;GENE_023874;GENE_017334;GENE_021310;GENE_012255;GENE_013302;GENE_020909;GENE_025654;GENE_017315;GENE_011590;GENE_020903;GENE_002359;GENE_006961;GENE_012171;GENE_025710;GENE_007023;GENE_018423;GENE_018751;GENE_026037;GENE_020986;GENE_008378;GENE_009402;GENE_008374;GEN…
GO:0048583	regulation of response to stimulus	biological_process	23	23/ 3414	GENE_011260;GENE_003213;GENE_009674;GENE_025354;GENE_000343;GENE_017275;GENE_026023;GENE_023627;GENE_010713;GENE_001983;GENE_009661;GENE_000992;GENE_011075;GENE_021498;GENE_016082;GENE_015520;GENE_016184;GENE_001564;GENE_004518;GENE_000259;GENE_016920;GENE_016431;GENE_021104
GO:0050793	regulation of developmental process	biological_process	10	10/ 3414	GENE_024206;GENE_011135;GENE_004220;GENE_003936;GENE_010376;GENE_019495;GENE_016774;GENE_013147;GENE_015671;GENE_009077
GO:0050794	regulation of cellular process	biological_process	350	350/ 3414	GENE_024381;GENE_002408;GENE_018531;GENE_016135;GENE_008306;GENE_015297;GENE_011369;GENE_018306;GENE_016039;GENE_020909;GENE_020903;GENE_002359;GENE_013363;GENE_014969;GENE_007023;GENE_026037;GENE_021126;GENE_016627;GENE_017081;GENE_010312;GENE_002108;GENE_000385;GENE_002696;GENE_010268;GENE_011133;GENE_025106;GENE_005370;GENE_016082;GENE_019289;GENE_016089;GENE_000370;GENE_025033;GENE_011145;GEN…
GO:2000241	regulation of reproductive process	biological_process	5	5/ 3414	GENE_001608;GENE_023627;GENE_015651;GENE_021054;GENE_016774
GO:0032879	regulation of localization	biological_process	3	3/ 3414	GENE_007720;GENE_002067;GENE_018782
GO:0051239	regulation of multicellular organismal process	biological_process	5	5/ 3414	GENE_010376;GENE_019495;GENE_016774;GENE_011135;GENE_013147
GO:0002682	regulation of immune system process	biological_process	2	2/ 3414	GENE_009674;GENE_009661
GO:0048518	positive regulation of biological process	biological_process	29	29/ 3414	GENE_003746;GENE_002125;GENE_015651;GENE_006910;GENE_020656;GENE_015671;GENE_014726;GENE_019334;GENE_018745;GENE_008009;GENE_011936;GENE_009661;GENE_000992;GENE_013147;GENE_013589;GENE_001291;GENE_024444;GENE_025261;GENE_018811;GENE_001148;GENE_001508;GENE_008826;GENE_006621;GENE_009674;GENE_016661;GENE_010376;GENE_016431;GENE_025036;GENE_012268
GO:0048519	negative regulation of biological process	biological_process	30	30/ 3414	GENE_010312;GENE_013354;GENE_006795;GENE_016885;GENE_006910;GENE_015633;GENE_003628;GENE_002067;GENE_021054;GENE_003411;GENE_016920;GENE_016135;GENE_001983;GENE_001564;GENE_009921;GENE_023874;GENE_013435;GENE_011133;GENE_011135;GENE_021498;GENE_012171;GENE_005014;GENE_018423;GENE_016089;GENE_020703;GENE_003696;GENE_021126;GENE_010257;GENE_025395;GENE_004776
GO:0042752	regulation of circadian rhythm	biological_process	5	5/ 3414	GENE_023627;GENE_017227;GENE_012259;GENE_002504;GENE_002125
GO:0023052	signaling	biological_process	1	1/ 3414	GENE_000467
GO:0023051	regulation of signaling	biological_process	10	10/ 3414	GENE_017275;GENE_003213;GENE_001983;GENE_021104;GENE_000259;GENE_016920;GENE_011260;GENE_016082;GENE_015520;GENE_001564
GO:0040008	regulation of growth	biological_process	6	6/ 3414	GENE_011135;GENE_003746;GENE_022743;GENE_013147;GENE_001148;GENE_020275
GO:0042391	regulation of membrane potential	biological_process	1	1/ 3414	GENE_023545
GO:0097035	regulation of membrane lipid distribution	biological_process	4	4/ 3414	GENE_003658;GENE_002958;GENE_020531;GENE_000101
GO:0051453	regulation of intracellular pH	biological_process	2	2/ 3414	GENE_022471;GENE_001298
GO:0008360	regulation of cell shape	biological_process	1	1/ 3414	GENE_004220
GO:0010817	regulation of hormone levels	biological_process	15	15/ 3414	GENE_011726;GENE_021418;GENE_023735;GENE_022698;GENE_000259;GENE_008278;GENE_024440;GENE_011379;GENE_000978;GENE_008524;GENE_025829;GENE_002248;GENE_025639;GENE_011398;GENE_017953
GO:0043487	regulation of RNA stability	biological_process	1	1/ 3414	GENE_024583
GO:0031647	regulation of protein stability	biological_process	1	1/ 3414	GENE_012481
GO:0030574	collagen catabolic process	biological_process	1	1/ 3414	GENE_009395
GO:1901564	organonitrogen compound metabolic process	biological_process	303	303/ 3414	GENE_006877;GENE_022807;GENE_023735;GENE_002634;GENE_023739;GENE_020690;GENE_018937;GENE_018932;GENE_001253;GENE_013865;GENE_018821;GENE_009081;GENE_025413;GENE_006525;GENE_013942;GENE_018829;GENE_018660;GENE_001735;GENE_006779;GENE_004014;GENE_016159;GENE_016727;GENE_007101;GENE_022033;GENE_013007;GENE_013416;GENE_024257;GENE_010364;GENE_021793;GENE_021310;GENE_012907;GENE_010200;GENE_025384;GEN…
GO:0034641	cellular nitrogen compound metabolic process	biological_process	262	262/ 3414	GENE_003647;GENE_022807;GENE_023735;GENE_011005;GENE_006877;GENE_023739;GENE_013279;GENE_018932;GENE_013374;GENE_016238;GENE_013942;GENE_002729;GENE_021640;GENE_013672;GENE_008178;GENE_017403;GENE_006201;GENE_014311;GENE_016725;GENE_016135;GENE_001738;GENE_007569;GENE_019495;GENE_023874;GENE_010364;GENE_021310;GENE_015864;GENE_007231;GENE_007617;GENE_025065;GENE_015367;GENE_018750;GENE_011012;GEN…
GO:0006083	acetate metabolic process	biological_process	1	1/ 3414	GENE_000432
GO:0043603	amide metabolic process	biological_process	36	36/ 3414	GENE_023735;GENE_023739;GENE_024949;GENE_001156;GENE_000432;GENE_007771;GENE_000780;GENE_001735;GENE_011668;GENE_003968;GENE_002627;GENE_021331;GENE_010364;GENE_002339;GENE_025384;GENE_005664;GENE_015743;GENE_000950;GENE_006869;GENE_011528;GENE_002397;GENE_010917;GENE_021640;GENE_003180;GENE_008405;GENE_004105;GENE_009333;GENE_002991;GENE_020077;GENE_007397;GENE_006338;GENE_003031;GENE_020056;GEN…
GO:0006101	citrate metabolic process	biological_process	1	1/ 3414	GENE_017968
GO:0044255	cellular lipid metabolic process	biological_process	97	97/ 3414	GENE_020698;GENE_023739;GENE_005414;GENE_022201;GENE_020149;GENE_020829;GENE_021507;GENE_024255;GENE_017640;GENE_005916;GENE_013471;GENE_020864;GENE_007864;GENE_000868;GENE_006960;GENE_017807;GENE_009378;GENE_007184;GENE_011884;GENE_005564;GENE_002759;GENE_020665;GENE_022352;GENE_007474;GENE_006768;GENE_015875;GENE_008947;GENE_007389;GENE_015699;GENE_005675;GENE_018910;GENE_005003;GENE_000141;GEN…
GO:0015979	photosynthesis	biological_process	5	5/ 3414	GENE_023363;GENE_021812;GENE_003727;GENE_010223;GENE_022722
GO:0006091	generation of precursor metabolites and energy	biological_process	20	20/ 3414	GENE_022500;GENE_015034;GENE_001401;GENE_025512;GENE_015056;GENE_010418;GENE_015913;GENE_020202;GENE_002442;GENE_008371;GENE_000517;GENE_004528;GENE_026195;GENE_012509;GENE_004918;GENE_021310;GENE_019381;GENE_013700;GENE_015853;GENE_001940
GO:0043446	cellular alkane metabolic process	biological_process	1	1/ 3414	GENE_002658
GO:0006730	one-carbon metabolic process	biological_process	4	4/ 3414	GENE_006338;GENE_000338;GENE_002862;GENE_020439
GO:0042180	cellular ketone metabolic process	biological_process	5	5/ 3414	GENE_023616;GENE_004091;GENE_002442;GENE_005509;GENE_008006
GO:0046483	heterocycle metabolic process	biological_process	256	256/ 3414	GENE_003647;GENE_023735;GENE_011005;GENE_006877;GENE_013279;GENE_018932;GENE_019840;GENE_016238;GENE_013942;GENE_002729;GENE_013672;GENE_008178;GENE_017403;GENE_006201;GENE_016725;GENE_016135;GENE_001738;GENE_007569;GENE_019495;GENE_023874;GENE_021310;GENE_015864;GENE_007231;GENE_020439;GENE_007617;GENE_025065;GENE_003504;GENE_011012;GENE_020909;GENE_005644;GENE_018906;GENE_025639;GENE_023337;GEN…
GO:0072593	reactive oxygen species metabolic process	biological_process	19	19/ 3414	GENE_006612;GENE_005868;GENE_003514;GENE_024206;GENE_023619;GENE_010304;GENE_021935;GENE_023156;GENE_011680;GENE_001248;GENE_005876;GENE_023720;GENE_002194;GENE_023620;GENE_005863;GENE_018835;GENE_000524;GENE_023906;GENE_019028
GO:0006790	sulfur compound metabolic process	biological_process	30	30/ 3414	GENE_011473;GENE_000432;GENE_024949;GENE_008537;GENE_011083;GENE_022228;GENE_018626;GENE_005552;GENE_000780;GENE_000338;GENE_001556;GENE_002862;GENE_013942;GENE_020249;GENE_006654;GENE_021793;GENE_002627;GENE_020901;GENE_015371;GENE_005400;GENE_014499;GENE_009333;GENE_023446;GENE_003180;GENE_020439;GENE_018036;GENE_007685;GENE_001743;GENE_022482;GENE_009780
GO:0006793	phosphorus metabolic process	biological_process	395	395/ 3414	GENE_003647;GENE_012562;GENE_001388;GENE_021012;GENE_010968;GENE_008306;GENE_015294;GENE_024255;GENE_016918;GENE_018306;GENE_020864;GENE_013363;GENE_024133;GENE_014969;GENE_025401;GENE_008169;GENE_017322;GENE_002323;GENE_013700;GENE_008947;GENE_016147;GENE_007389;GENE_017087;GENE_002459;GENE_013516;GENE_024720;GENE_009262;GENE_022228;GENE_005802;GENE_001556;GENE_006585;GENE_004172;GENE_010268;GEN…
GO:0009404	toxin metabolic process	biological_process	1	1/ 3414	GENE_003180
GO:0006081	cellular aldehyde metabolic process	biological_process	7	7/ 3414	GENE_011116;GENE_003881;GENE_014757;GENE_004603;GENE_002054;GENE_005509;GENE_018094
GO:0006082	organic acid metabolic process	biological_process	118	118/ 3414	GENE_005414;GENE_001253;GENE_011083;GENE_006525;GENE_005552;GENE_022201;GENE_001735;GENE_025865;GENE_016727;GENE_021507;GENE_002330;GENE_025384;GENE_005916;GENE_007864;GENE_000868;GENE_015371;GENE_005400;GENE_009378;GENE_007184;GENE_015663;GENE_003180;GENE_002759;GENE_020439;GENE_007101;GENE_007474;GENE_006768;GENE_020989;GENE_003031;GENE_015875;GENE_016840;GENE_015699;GENE_005675;GENE_018910;GEN…
GO:0044248	cellular catabolic process	biological_process	77	77/ 3414	GENE_013279;GENE_022942;GENE_009851;GENE_011477;GENE_005003;GENE_006795;GENE_021487;GENE_012237;GENE_013516;GENE_002839;GENE_001248;GENE_002273;GENE_023720;GENE_004105;GENE_007617;GENE_007619;GENE_020593;GENE_012361;GENE_019897;GENE_022201;GENE_006612;GENE_001735;GENE_004414;GENE_025865;GENE_016727;GENE_023818;GENE_016135;GENE_016089;GENE_003968;GENE_009921;GENE_005876;GENE_015148;GENE_018835;GEN…
GO:0044249	cellular biosynthetic process	biological_process	231	231/ 3414	GENE_022807;GENE_023735;GENE_011005;GENE_023739;GENE_004091;GENE_005414;GENE_002273;GENE_007735;GENE_005564;GENE_011083;GENE_013942;GENE_022039;GENE_006338;GENE_025865;GENE_016727;GENE_020829;GENE_021507;GENE_019495;GENE_010364;GENE_009165;GENE_013672;GENE_007231;GENE_017640;GENE_005916;GENE_011012;GENE_010490;GENE_007864;GENE_010094;GENE_015371;GENE_002442;GENE_017807;GENE_000653;GENE_009378;GEN…
GO:0009850	auxin metabolic process	biological_process	2	2/ 3414	GENE_011726;GENE_008278
GO:0006725	cellular aromatic compound metabolic process	biological_process	283	283/ 3414	GENE_003647;GENE_023735;GENE_011005;GENE_003074;GENE_013279;GENE_018932;GENE_013374;GENE_007735;GENE_006524;GENE_016238;GENE_013942;GENE_002729;GENE_008560;GENE_013672;GENE_003764;GENE_008178;GENE_017403;GENE_025865;GENE_016727;GENE_016725;GENE_016135;GENE_001738;GENE_007569;GENE_019495;GENE_023874;GENE_021310;GENE_015864;GENE_007231;GENE_020439;GENE_007617;GENE_025065;GENE_003504;GENE_011012;GEN…
GO:0043094	cellular metabolic compound salvage	biological_process	4	4/ 3414	GENE_009942;GENE_018626;GENE_009594;GENE_016830
GO:0006575	cellular modified amino acid metabolic process	biological_process	9	9/ 3414	GENE_002991;GENE_020901;GENE_000141;GENE_006338;GENE_003031;GENE_011083;GENE_016840;GENE_003180;GENE_020439
GO:0006805	xenobiotic metabolic process	biological_process	1	1/ 3414	GENE_011773
GO:0044550	secondary metabolite biosynthetic process	biological_process	20	20/ 3414	GENE_013085;GENE_019969;GENE_002330;GENE_000900;GENE_017909;GENE_025865;GENE_012893;GENE_016727;GENE_012066;GENE_007735;GENE_011816;GENE_016220;GENE_020077;GENE_006524;GENE_010917;GENE_002273;GENE_020274;GENE_003180;GENE_006544;GENE_005890
GO:0044283	small molecule biosynthetic process	biological_process	83	83/ 3414	GENE_005675;GENE_011473;GENE_002658;GENE_007685;GENE_010188;GENE_025526;GENE_005480;GENE_004091;GENE_005414;GENE_005531;GENE_009378;GENE_024942;GENE_022482;GENE_011896;GENE_011083;GENE_022228;GENE_013942;GENE_002273;GENE_012120;GENE_012286;GENE_001556;GENE_021164;GENE_018478;GENE_025865;GENE_016727;GENE_015663;GENE_020584;GENE_005898;GENE_018849;GENE_020102;GENE_017769;GENE_013007;GENE_021331;GEN…
GO:0042446	hormone biosynthetic process	biological_process	7	7/ 3414	GENE_023735;GENE_008278;GENE_021418;GENE_000978;GENE_002248;GENE_024440;GENE_017953
GO:1901576	organic substance biosynthetic process	biological_process	249	249/ 3414	GENE_022807;GENE_023735;GENE_011005;GENE_023739;GENE_004091;GENE_015612;GENE_005414;GENE_002273;GENE_007735;GENE_017798;GENE_011083;GENE_019929;GENE_013942;GENE_022039;GENE_006338;GENE_025865;GENE_016727;GENE_020829;GENE_021507;GENE_026180;GENE_019495;GENE_024255;GENE_010364;GENE_009165;GENE_013672;GENE_007231;GENE_017640;GENE_005916;GENE_011012;GENE_010490;GENE_007864;GENE_010094;GENE_015371;GEN…
GO:0043605	amide catabolic process	biological_process	1	1/ 3414	GENE_004105
GO:0044282	small molecule catabolic process	biological_process	37	37/ 3414	GENE_021532;GENE_003406;GENE_025526;GENE_021487;GENE_007617;GENE_020322;GENE_015881;GENE_001735;GENE_025865;GENE_016727;GENE_003968;GENE_002330;GENE_022201;GENE_005003;GENE_013222;GENE_018323;GENE_002273;GENE_012237;GENE_025106;GENE_008312;GENE_024521;GENE_014757;GENE_007397;GENE_015663;GENE_003619;GENE_005509;GENE_004105;GENE_025384;GENE_020593;GENE_008006;GENE_002759;GENE_006338;GENE_015811;GEN…
GO:1901575	organic substance catabolic process	biological_process	154	154/ 3414	GENE_009899;GENE_009959;GENE_013279;GENE_024410;GENE_018821;GENE_000415;GENE_012361;GENE_018829;GENE_022201;GENE_001735;GENE_025865;GENE_016727;GENE_000544;GENE_016135;GENE_013416;GENE_024257;GENE_002759;GENE_025384;GENE_019858;GENE_010304;GENE_013875;GENE_014757;GENE_015663;GENE_023804;GENE_008560;GENE_024876;GENE_022120;GENE_006933;GENE_011655;GENE_007101;GENE_005841;GENE_019028;GENE_015875;GEN…
GO:0046292	formaldehyde metabolic process	biological_process	1	1/ 3414	GENE_014757
GO:0006766	vitamin metabolic process	biological_process	14	14/ 3414	GENE_001556;GENE_025526;GENE_025697;GENE_018874;GENE_006338;GENE_003323;GENE_006654;GENE_023446;GENE_011896;GENE_020322;GENE_022228;GENE_013942;GENE_002054;GENE_016840
GO:0005996	monosaccharide metabolic process	biological_process	24	24/ 3414	GENE_025526;GENE_024821;GENE_017787;GENE_020189;GENE_020322;GENE_025825;GENE_010418;GENE_004405;GENE_017100;GENE_008158;GENE_024521;GENE_014551;GENE_006472;GENE_008561;GENE_024942;GENE_022330;GENE_000517;GENE_015913;GENE_026195;GENE_021089;GENE_021310;GENE_013985;GENE_013312;GENE_025697
GO:0006066	alcohol metabolic process	biological_process	14	14/ 3414	GENE_001556;GENE_016668;GENE_025526;GENE_025697;GENE_017807;GENE_003953;GENE_004084;GENE_017616;GENE_002178;GENE_023446;GENE_020322;GENE_022228;GENE_013942;GENE_006654
GO:0055086	nucleobase-containing small molecule metabolic process	biological_process	40	40/ 3414	GENE_006877;GENE_011477;GENE_009506;GENE_013516;GENE_000517;GENE_009996;GENE_024949;GENE_007617;GENE_000432;GENE_012120;GENE_000780;GENE_008343;GENE_010418;GENE_002627;GENE_022644;GENE_018123;GENE_008758;GENE_021310;GENE_016830;GENE_009942;GENE_000614;GENE_003323;GENE_009594;GENE_006905;GENE_024293;GENE_009780;GENE_015647;GENE_003619;GENE_000595;GENE_022330;GENE_009333;GENE_004084;GENE_007101;GEN…
GO:0046415	urate metabolic process	biological_process	1	1/ 3414	GENE_003619
GO:0043413	macromolecule glycosylation	biological_process	1	1/ 3414	GENE_009996
GO:0043414	macromolecule methylation	biological_process	4	4/ 3414	GENE_013326;GENE_026190;GENE_023574;GENE_013374
GO:0043545	molybdopterin cofactor metabolic process	biological_process	1	1/ 3414	GENE_018626
GO:0006629	lipid metabolic process	biological_process	144	144/ 3414	GENE_009899;GENE_024222;GENE_020698;GENE_009959;GENE_005414;GENE_000415;GENE_021717;GENE_019411;GENE_022201;GENE_021014;GENE_020829;GENE_021507;GENE_007038;GENE_024255;GENE_023739;GENE_017640;GENE_020386;GENE_013471;GENE_013474;GENE_020864;GENE_003733;GENE_007864;GENE_000868;GENE_015069;GENE_017807;GENE_009378;GENE_007184;GENE_011884;GENE_005564;GENE_002759;GENE_020665;GENE_013078;GENE_022352;GEN…
GO:0006139	nucleobase-containing compound metabolic process	biological_process	223	223/ 3414	GENE_003647;GENE_011005;GENE_006877;GENE_013279;GENE_018932;GENE_013374;GENE_016238;GENE_012361;GENE_002729;GENE_013672;GENE_008178;GENE_017403;GENE_006201;GENE_016725;GENE_016135;GENE_001738;GENE_007569;GENE_019495;GENE_023874;GENE_021310;GENE_015864;GENE_007231;GENE_007617;GENE_025065;GENE_003504;GENE_011012;GENE_020909;GENE_005644;GENE_018906;GENE_023337;GENE_012171;GENE_011098;GENE_005014;GEN…
GO:0006099	tricarboxylic acid cycle	biological_process	6	6/ 3414	GENE_019567;GENE_002627;GENE_004084;GENE_004603;GENE_017968;GENE_012085
GO:0005975	carbohydrate metabolic process	biological_process	149	149/ 3414	GENE_024410;GENE_018821;GENE_019929;GENE_018829;GENE_025319;GENE_009717;GENE_001733;GENE_024876;GENE_013416;GENE_024257;GENE_009646;GENE_012209;GENE_021310;GENE_025061;GENE_024093;GENE_015468;GENE_005642;GENE_002604;GENE_020280;GENE_025824;GENE_005157;GENE_011845;GENE_000517;GENE_004603;GENE_025241;GENE_025958;GENE_011090;GENE_008561;GENE_000544;GENE_025089;GENE_006933;GENE_009674;GENE_019755;GEN…
GO:0019538	protein metabolic process	biological_process	154	154/ 3414	GENE_002634;GENE_020690;GENE_018937;GENE_018932;GENE_013865;GENE_025413;GENE_018660;GENE_006779;GENE_004014;GENE_022033;GENE_020226;GENE_010364;GENE_021793;GENE_002339;GENE_010200;GENE_001781;GENE_019858;GENE_013671;GENE_013364;GENE_002523;GENE_022082;GENE_025957;GENE_021640;GENE_018982;GENE_022120;GENE_024875;GENE_012172;GENE_011655;GENE_021451;GENE_025794;GENE_018257;GENE_001427;GENE_006151;GEN…
GO:0006520	amino acid metabolic process	biological_process	55	55/ 3414	GENE_011473;GENE_021043;GENE_007685;GENE_025865;GENE_005531;GENE_001253;GENE_022482;GENE_011083;GENE_006525;GENE_005552;GENE_003942;GENE_018626;GENE_012286;GENE_001735;GENE_008006;GENE_016727;GENE_002594;GENE_020989;GENE_004171;GENE_003968;GENE_002330;GENE_021331;GENE_003406;GENE_025384;GENE_018323;GENE_002273;GENE_000485;GENE_005177;GENE_003416;GENE_025106;GENE_003486;GENE_012452;GENE_020901;GEN…
GO:0019637	organophosphate metabolic process	biological_process	57	57/ 3414	GENE_015173;GENE_020698;GENE_011477;GENE_001790;GENE_018626;GENE_013516;GENE_000432;GENE_000517;GENE_024949;GENE_022228;GENE_020323;GENE_013942;GENE_006654;GENE_000780;GENE_001556;GENE_020957;GENE_007464;GENE_010418;GENE_024293;GENE_002627;GENE_024255;GENE_018123;GENE_021270;GENE_021310;GENE_022644;GENE_010121;GENE_016830;GENE_009942;GENE_020074;GENE_020864;GENE_000614;GENE_003323;GENE_010094;GEN…
GO:0120252	hydrocarbon metabolic process	biological_process	3	3/ 3414	GENE_002658;GENE_019897;GENE_019651
GO:0120254	olefinic compound metabolic process	biological_process	5	5/ 3414	GENE_016727;GENE_002330;GENE_002273;GENE_017807;GENE_025865
GO:0015977	carbon fixation	biological_process	2	2/ 3414	GENE_023363;GENE_019567
GO:1901135	carbohydrate derivative metabolic process	biological_process	60	60/ 3414	GENE_006877;GENE_025573;GENE_007617;GENE_009506;GENE_013516;GENE_000432;GENE_024821;GENE_009996;GENE_018821;GENE_008537;GENE_018800;GENE_022228;GENE_006654;GENE_018829;GENE_012120;GENE_000780;GENE_011477;GENE_001556;GENE_008343;GENE_007464;GENE_010418;GENE_013416;GENE_024257;GENE_008758;GENE_021310;GENE_025165;GENE_003323;GENE_013432;GENE_016830;GENE_009942;GENE_000614;GENE_025204;GENE_009594;GEN…
GO:1901615	organic hydroxy compound metabolic process	biological_process	33	33/ 3414	GENE_024222;GENE_007533;GENE_018910;GENE_025526;GENE_021487;GENE_024949;GENE_024929;GENE_020322;GENE_022228;GENE_013942;GENE_006654;GENE_001556;GENE_020149;GENE_006533;GENE_001678;GENE_024503;GENE_007956;GENE_017807;GENE_024293;GENE_008524;GENE_002178;GENE_023446;GENE_002054;GENE_003953;GENE_005509;GENE_009333;GENE_016668;GENE_007689;GENE_025697;GENE_021014;GENE_017616;GENE_021532;GENE_004084
GO:0009812	flavonoid metabolic process	biological_process	3	3/ 3414	GENE_022845;GENE_006292;GENE_001461
GO:1901360	organic cyclic compound metabolic process	biological_process	289	289/ 3414	GENE_003647;GENE_023735;GENE_011005;GENE_024222;GENE_013279;GENE_018932;GENE_013374;GENE_022738;GENE_007735;GENE_006524;GENE_016238;GENE_013942;GENE_002729;GENE_008560;GENE_013672;GENE_003764;GENE_008178;GENE_017403;GENE_021014;GENE_016727;GENE_016725;GENE_016135;GENE_001738;GENE_007569;GENE_019495;GENE_023874;GENE_021310;GENE_015864;GENE_007231;GENE_020439;GENE_007617;GENE_025065;GENE_003504;GEN…
GO:0042743	hydrogen peroxide metabolic process	biological_process	18	18/ 3414	GENE_006612;GENE_005868;GENE_003514;GENE_023720;GENE_023619;GENE_010304;GENE_021935;GENE_023156;GENE_011680;GENE_001248;GENE_005876;GENE_002194;GENE_023620;GENE_005863;GENE_018835;GENE_000524;GENE_023906;GENE_019028
GO:0035383	thioester metabolic process	biological_process	6	6/ 3414	GENE_009333;GENE_002627;GENE_024949;GENE_009780;GENE_000432;GENE_000780
GO:0043170	macromolecule metabolic process	biological_process	390	390/ 3414	GENE_003647;GENE_006779;GENE_017403;GENE_018532;GENE_016135;GENE_013416;GENE_021795;GENE_012035;GENE_021793;GENE_009165;GENE_015864;GENE_020909;GENE_010490;GENE_023337;GENE_015465;GENE_025957;GENE_025794;GENE_021125;GENE_016627;GENE_023418;GENE_010640;GENE_012185;GENE_002104;GENE_019432;GENE_023025;GENE_008841;GENE_003356;GENE_017883;GENE_013564;GENE_000975;GENE_011135;GENE_011684;GENE_011528;GEN…
GO:0046500	S-adenosylmethionine metabolic process	biological_process	2	2/ 3414	GENE_000338;GENE_002862
GO:0006749	glutathione metabolic process	biological_process	18	18/ 3414	GENE_015267;GENE_010867;GENE_001472;GENE_015303;GENE_002991;GENE_008632;GENE_008623;GENE_008583;GENE_016491;GENE_026325;GENE_015288;GENE_006933;GENE_004301;GENE_003031;GENE_015333;GENE_006982;GENE_003180;GENE_008526
GO:0030638	polyketide metabolic process	biological_process	1	1/ 3414	GENE_000900
GO:0016131	brassinosteroid metabolic process	biological_process	1	1/ 3414	GENE_008524
GO:0009690	cytokinin metabolic process	biological_process	8	8/ 3414	GENE_022698;GENE_024440;GENE_000978;GENE_025829;GENE_002248;GENE_025639;GENE_021418;GENE_017953
GO:0030186	melatonin metabolic process	biological_process	1	1/ 3414	GENE_023735
GO:0046283	anthocyanin-containing compound metabolic process	biological_process	1	1/ 3414	GENE_001461
GO:0046149	pigment catabolic process	biological_process	1	1/ 3414	GENE_022534
GO:0046148	pigment biosynthetic process	biological_process	7	7/ 3414	GENE_015266;GENE_010223;GENE_001461;GENE_019456;GENE_025477;GENE_017897;GENE_022228
GO:0042168	heme metabolic process	biological_process	1	1/ 3414	GENE_017897
GO:0009698	phenylpropanoid metabolic process	biological_process	22	22/ 3414	GENE_019969;GENE_012066;GENE_007735;GENE_006524;GENE_006544;GENE_005890;GENE_025865;GENE_016727;GENE_011816;GENE_002330;GENE_023818;GENE_002273;GENE_013085;GENE_017909;GENE_010718;GENE_016220;GENE_008560;GENE_005841;GENE_023804;GENE_010278;GENE_005821;GENE_020274
GO:0046937	phytochelatin metabolic process	biological_process	1	1/ 3414	GENE_010917
GO:0019757	glycosinolate metabolic process	biological_process	1	1/ 3414	GENE_003180
GO:0045454	cell redox homeostasis	biological_process	1	1/ 3414	GENE_004301
GO:0055082	intracellular chemical homeostasis	biological_process	8	8/ 3414	GENE_009944;GENE_003488;GENE_026195;GENE_009848;GENE_021331;GENE_011757;GENE_001298;GENE_022471
GO:0055088	lipid homeostasis	biological_process	2	2/ 3414	GENE_012237;GENE_001790
GO:0098771	inorganic ion homeostasis	biological_process	7	7/ 3414	GENE_009701;GENE_025100;GENE_009944;GENE_003488;GENE_014929;GENE_009848;GENE_018026
GO:0050801	monoatomic ion homeostasis	biological_process	14	14/ 3414	GENE_014659;GENE_009701;GENE_016966;GENE_009944;GENE_003488;GENE_014929;GENE_017045;GENE_009848;GENE_007656;GENE_011757;GENE_001298;GENE_022471;GENE_001922;GENE_018026
GO:0033500	carbohydrate homeostasis	biological_process	1	1/ 3414	GENE_026195
GO:0006935	chemotaxis	biological_process	1	1/ 3414	GENE_004090
GO:0140013	meiotic nuclear division	biological_process	3	3/ 3414	GENE_010880;GENE_010972;GENE_025421
GO:0061983	meiosis II cell cycle process	biological_process	2	2/ 3414	GENE_010880;GENE_010972
GO:0033313	meiotic cell cycle checkpoint signaling	biological_process	1	1/ 3414	GENE_021054
GO:0007131	reciprocal meiotic recombination	biological_process	1	1/ 3414	GENE_011623
GO:0070192	chromosome organization involved in meiotic cell cycle	biological_process	1	1/ 3414	GENE_022543
GO:0010162	seed dormancy process	biological_process	1	1/ 3414	GENE_001608
GO:0009900	dehiscence	biological_process	1	1/ 3414	GENE_017960
GO:0007143	female meiotic nuclear division	biological_process	1	1/ 3414	GENE_025421
GO:0007140	male meiotic nuclear division	biological_process	3	3/ 3414	GENE_010880;GENE_010972;GENE_025421
GO:0010228	vegetative to reproductive phase transition of meristem	biological_process	1	1/ 3414	GENE_001165
GO:0009793	embryo development ending in seed dormancy	biological_process	3	3/ 3414	GENE_021438;GENE_004090;GENE_019483
GO:0048658	anther wall tapetum development	biological_process	1	1/ 3414	GENE_000950
GO:0048508	embryonic meristem development	biological_process	2	2/ 3414	GENE_002528;GENE_011021
GO:0009835	fruit ripening	biological_process	4	4/ 3414	GENE_013434;GENE_000535;GENE_009202;GENE_017378
GO:0048608	reproductive structure development	biological_process	7	7/ 3414	GENE_024206;GENE_019617;GENE_024237;GENE_006961;GENE_021274;GENE_009077;GENE_003180
GO:0012501	programmed cell death	biological_process	7	7/ 3414	GENE_017275;GENE_020712;GENE_003213;GENE_021104;GENE_011260;GENE_016082;GENE_015520
GO:0006914	autophagy	biological_process	5	5/ 3414	GENE_007619;GENE_022942;GENE_009851;GENE_015148;GENE_002839
GO:0140115	export across plasma membrane	biological_process	8	8/ 3414	GENE_012095;GENE_026120;GENE_000259;GENE_024896;GENE_002380;GENE_002406;GENE_001298;GENE_022883
GO:0046618	xenobiotic export from cell	biological_process	6	6/ 3414	GENE_012095;GENE_026120;GENE_024896;GENE_002380;GENE_002406;GENE_022883
GO:0032940	secretion by cell	biological_process	5	5/ 3414	GENE_016433;GENE_021498;GENE_010422;GENE_018535;GENE_023078
GO:0098609	cell-cell adhesion	biological_process	1	1/ 3414	GENE_002590
GO:0007267	cell-cell signaling	biological_process	1	1/ 3414	GENE_000467
GO:0031668	cellular response to extracellular stimulus	biological_process	5	5/ 3414	GENE_009661;GENE_016821;GENE_009674;GENE_002839;GENE_023078
GO:0032507	maintenance of protein location in cell	biological_process	1	1/ 3414	GENE_021498
GO:0006313	DNA transposition	biological_process	2	2/ 3414	GENE_021219;GENE_023654
GO:0009294	DNA-mediated transformation	biological_process	2	2/ 3414	GENE_023028;GENE_015795
GO:0140056	organelle localization by membrane tethering	biological_process	1	1/ 3414	GENE_021498
GO:1903047	mitotic cell cycle process	biological_process	24	24/ 3414	GENE_009898;GENE_013253;GENE_013198;GENE_018649;GENE_003411;GENE_021054;GENE_001712;GENE_022543;GENE_022039;GENE_006999;GENE_004177;GENE_011482;GENE_010619;GENE_005748;GENE_011052;GENE_023315;GENE_022180;GENE_006728;GENE_003343;GENE_001257;GENE_022069;GENE_012400;GENE_016602;GENE_006113
GO:1903046	meiotic cell cycle process	biological_process	6	6/ 3414	GENE_010880;GENE_010972;GENE_011623;GENE_025421;GENE_021054;GENE_022543
GO:0044770	cell cycle phase transition	biological_process	9	9/ 3414	GENE_023315;GENE_006999;GENE_001257;GENE_013253;GENE_022069;GENE_010619;GENE_006728;GENE_005748;GENE_001712
GO:0007051	spindle organization	biological_process	5	5/ 3414	GENE_003343;GENE_009898;GENE_011681;GENE_021765;GENE_020994
GO:0007059	chromosome segregation	biological_process	4	4/ 3414	GENE_018660;GENE_021442;GENE_021054;GENE_007804
GO:0007062	sister chromatid cohesion	biological_process	4	4/ 3414	GENE_005279;GENE_000538;GENE_017919;GENE_003411
GO:0051231	spindle elongation	biological_process	1	1/ 3414	GENE_009898
GO:0032506	cytokinetic process	biological_process	1	1/ 3414	GENE_022180
GO:0044786	cell cycle DNA replication	biological_process	2	2/ 3414	GENE_021630;GENE_000176
GO:0008608	attachment of spindle microtubules to kinetochore	biological_process	1	1/ 3414	GENE_018649
GO:0051304	chromosome separation	biological_process	1	1/ 3414	GENE_022543
GO:0061077	chaperone-mediated protein folding	biological_process	6	6/ 3414	GENE_018884;GENE_020339;GENE_020928;GENE_020181;GENE_020267;GENE_020178
GO:0034975	protein folding in endoplasmic reticulum	biological_process	1	1/ 3414	GENE_021437
GO:0006458	'de novo' protein folding	biological_process	6	6/ 3414	GENE_018884;GENE_020339;GENE_020928;GENE_020181;GENE_020267;GENE_020178
GO:0042026	protein refolding	biological_process	6	6/ 3414	GENE_020339;GENE_020928;GENE_023776;GENE_020181;GENE_020267;GENE_020178
GO:0007023	post-chaperonin tubulin folding pathway	biological_process	1	1/ 3414	GENE_011665
GO:0070727	cellular macromolecule localization	biological_process	35	35/ 3414	GENE_022942;GENE_008903;GENE_014362;GENE_006974;GENE_013374;GENE_013334;GENE_021054;GENE_015513;GENE_021202;GENE_004152;GENE_023078;GENE_018535;GENE_009848;GENE_022628;GENE_009062;GENE_009109;GENE_013326;GENE_003999;GENE_001969;GENE_021498;GENE_005728;GENE_011098;GENE_000463;GENE_009944;GENE_004558;GENE_013532;GENE_003180;GENE_006721;GENE_021765;GENE_010422;GENE_016433;GENE_021126;GENE_007309;GEN…
GO:0046907	intracellular transport	biological_process	16	16/ 3414	GENE_004821;GENE_003999;GENE_001969;GENE_021498;GENE_022268;GENE_006974;GENE_009848;GENE_013532;GENE_002072;GENE_021126;GENE_023078;GENE_000463;GENE_009944;GENE_018983;GENE_014362;GENE_006721
GO:0051668	localization within membrane	biological_process	3	3/ 3414	GENE_021126;GENE_021498;GENE_013532
GO:0006887	exocytosis	biological_process	4	4/ 3414	GENE_016433;GENE_010422;GENE_018535;GENE_021498
GO:0048193	Golgi vesicle transport	biological_process	6	6/ 3414	GENE_001969;GENE_023078;GENE_006974;GENE_007309;GENE_004558;GENE_002363
GO:0006897	endocytosis	biological_process	4	4/ 3414	GENE_010844;GENE_010195;GENE_022614;GENE_025433
GO:0044085	cellular component biogenesis	biological_process	19	19/ 3414	GENE_022039;GENE_010640;GENE_001698;GENE_002303;GENE_013534;GENE_006142;GENE_001775;GENE_001326;GENE_016163;GENE_009506;GENE_012400;GENE_011052;GENE_001608;GENE_016602;GENE_011845;GENE_006652;GENE_007210;GENE_006113;GENE_018351
GO:0016043	cellular component organization	biological_process	121	121/ 3414	GENE_009898;GENE_021903;GENE_024781;GENE_024027;GENE_004220;GENE_018660;GENE_006673;GENE_022368;GENE_020994;GENE_011482;GENE_023874;GENE_010364;GENE_013308;GENE_012256;GENE_025061;GENE_018750;GENE_022085;GENE_013875;GENE_023420;GENE_003343;GENE_024876;GENE_003180;GENE_020531;GENE_025620;GENE_010972;GENE_002958;GENE_003936;GENE_008076;GENE_024306;GENE_022614;GENE_020742;GENE_000819;GENE_005279;GEN…
GO:0042546	cell wall biogenesis	biological_process	18	18/ 3414	GENE_022039;GENE_010640;GENE_001698;GENE_002303;GENE_013534;GENE_006142;GENE_001775;GENE_001326;GENE_016163;GENE_009506;GENE_012400;GENE_011052;GENE_016602;GENE_011845;GENE_006652;GENE_007210;GENE_006113;GENE_018351
GO:0071555	cell wall organization	biological_process	34	34/ 3414	GENE_010640;GENE_025337;GENE_025620;GENE_004220;GENE_023025;GENE_017683;GENE_010290;GENE_009202;GENE_001698;GENE_001510;GENE_006652;GENE_023089;GENE_006142;GENE_001775;GENE_013825;GENE_013534;GENE_012256;GENE_025061;GENE_007210;GENE_011052;GENE_009506;GENE_018154;GENE_013875;GENE_020687;GENE_008002;GENE_024876;GENE_003180;GENE_013836;GENE_011845;GENE_009422;GENE_020050;GENE_018351;GENE_012509;GEN…
GO:0071669	plant-type cell wall organization or biogenesis	biological_process	16	16/ 3414	GENE_022039;GENE_011845;GENE_008002;GENE_012400;GENE_023089;GENE_020687;GENE_010290;GENE_009422;GENE_011052;GENE_018154;GENE_012256;GENE_016602;GENE_002303;GENE_001326;GENE_006113;GENE_009506
GO:0031023	microtubule organizing center organization	biological_process	1	1/ 3414	GENE_011681
GO:0007018	microtubule-based movement	biological_process	16	16/ 3414	GENE_016599;GENE_025864;GENE_009898;GENE_025884;GENE_013372;GENE_021457;GENE_001022;GENE_017530;GENE_005434;GENE_011179;GENE_001067;GENE_010736;GENE_018055;GENE_017268;GENE_014427;GENE_005628
GO:0000226	microtubule cytoskeleton organization	biological_process	12	12/ 3414	GENE_021765;GENE_009898;GENE_013345;GENE_022368;GENE_020994;GENE_024798;GENE_011681;GENE_023091;GENE_003343;GENE_025023;GENE_022044;GENE_000819
GO:0070887	cellular response to chemical stimulus	biological_process	7	7/ 3414	GENE_001769;GENE_004590;GENE_009674;GENE_009661;GENE_011623;GENE_001586;GENE_004002
GO:0033554	cellular response to stress	biological_process	39	39/ 3414	GENE_000538;GENE_024206;GENE_003213;GENE_019840;GENE_006420;GENE_011260;GENE_002729;GENE_021544;GENE_006303;GENE_006201;GENE_018532;GENE_017883;GENE_009661;GENE_011623;GENE_005668;GENE_023874;GENE_025004;GENE_013435;GENE_016835;GENE_018864;GENE_017919;GENE_019858;GENE_023078;GENE_010308;GENE_005014;GENE_017275;GENE_016082;GENE_015864;GENE_003180;GENE_002839;GENE_018750;GENE_004938;GENE_008359;GEN…
GO:0104004	cellular response to environmental stimulus	biological_process	6	6/ 3414	GENE_009674;GENE_009661;GENE_011623;GENE_022218;GENE_017798;GENE_007231
GO:0009826	unidimensional cell growth	biological_process	2	2/ 3414	GENE_024522;GENE_007957
GO:0048588	developmental cell growth	biological_process	1	1/ 3414	GENE_007957
GO:0007166	cell surface receptor signaling pathway	biological_process	23	23/ 3414	GENE_020088;GENE_003745;GENE_007855;GENE_025198;GENE_023188;GENE_019318;GENE_015807;GENE_013753;GENE_011385;GENE_020163;GENE_025148;GENE_018306;GENE_004835;GENE_013183;GENE_011369;GENE_018852;GENE_019289;GENE_021557;GENE_015407;GENE_000013;GENE_019303;GENE_021534;GENE_025171
GO:0009755	hormone-mediated signaling pathway	biological_process	70	70/ 3414	GENE_011472;GENE_020874;GENE_011691;GENE_008832;GENE_011005;GENE_016949;GENE_020973;GENE_001919;GENE_000259;GENE_002744;GENE_002671;GENE_002746;GENE_024206;GENE_024122;GENE_002696;GENE_001714;GENE_007816;GENE_007987;GENE_011379;GENE_013334;GENE_004199;GENE_026083;GENE_018531;GENE_016219;GENE_008635;GENE_008306;GENE_026220;GENE_008717;GENE_010101;GENE_000588;GENE_013647;GENE_007271;GENE_001921;GEN…
GO:0030968	endoplasmic reticulum unfolded protein response	biological_process	1	1/ 3414	GENE_024206
GO:0002764	immune response-regulating signaling pathway	biological_process	2	2/ 3414	GENE_009674;GENE_009661
GO:0007186	G protein-coupled receptor signaling pathway	biological_process	4	4/ 3414	GENE_019704;GENE_024206;GENE_024098;GENE_004244
GO:0035556	intracellular signal transduction	biological_process	41	41/ 3414	GENE_026083;GENE_011691;GENE_011005;GENE_014344;GENE_016952;GENE_002553;GENE_003278;GENE_016219;GENE_009262;GENE_002067;GENE_021054;GENE_003411;GENE_026026;GENE_022368;GENE_018531;GENE_008306;GENE_013744;GENE_011998;GENE_010268;GENE_006245;GENE_014236;GENE_016782;GENE_008131;GENE_014232;GENE_025065;GENE_011012;GENE_001109;GENE_023647;GENE_014047;GENE_005014;GENE_002667;GENE_025201;GENE_018034;GEN…
GO:0140961	cellular detoxification of metal ion	biological_process	1	1/ 3414	GENE_010917
GO:0098869	cellular oxidant detoxification	biological_process	3	3/ 3414	GENE_017350;GENE_017342;GENE_017312
GO:0110095	cellular detoxification of aldehyde	biological_process	1	1/ 3414	GENE_014757
GO:0051321	meiotic cell cycle	biological_process	3	3/ 3414	GENE_015651;GENE_003403;GENE_000752
GO:0000278	mitotic cell cycle	biological_process	5	5/ 3414	GENE_021442;GENE_000819;GENE_007804;GENE_025023;GENE_013345
GO:0045165	cell fate commitment	biological_process	1	1/ 3414	GENE_009077
GO:0030154	cell differentiation	biological_process	9	9/ 3414	GENE_011472;GENE_026037;GENE_020941;GENE_008009;GENE_024444;GENE_022808;GENE_016661;GENE_025710;GENE_013302
GO:0001708	cell fate specification	biological_process	2	2/ 3414	GENE_009077;GENE_023577
GO:0001709	cell fate determination	biological_process	1	1/ 3414	GENE_016423
GO:1903825	organic acid transmembrane transport	biological_process	16	16/ 3414	GENE_020874;GENE_013334;GENE_007271;GENE_008522;GENE_022268;GENE_005534;GENE_006708;GENE_004821;GENE_002548;GENE_006637;GENE_026210;GENE_000588;GENE_016949;GENE_000987;GENE_012532;GENE_019006
GO:0035672	oligopeptide transmembrane transport	biological_process	2	2/ 3414	GENE_024904;GENE_025064
GO:1990542	mitochondrial transmembrane transport	biological_process	2	2/ 3414	GENE_002072;GENE_006637
GO:0035461	vitamin transmembrane transport	biological_process	1	1/ 3414	GENE_006637
GO:0034220	monoatomic ion transmembrane transport	biological_process	16	16/ 3414	GENE_014659;GENE_009331;GENE_016966;GENE_003972;GENE_009944;GENE_003488;GENE_015034;GENE_013103;GENE_017045;GENE_009848;GENE_022879;GENE_001298;GENE_022471;GENE_004040;GENE_002067;GENE_023545
GO:0080162	endoplasmic reticulum to cytosol auxin transport	biological_process	2	2/ 3414	GENE_011379;GENE_011398
GO:0072530	purine-containing compound transmembrane transport	biological_process	3	3/ 3414	GENE_007989;GENE_017991;GENE_022735
GO:0098739	import across plasma membrane	biological_process	1	1/ 3414	GENE_022471
GO:1901679	nucleotide transmembrane transport	biological_process	2	2/ 3414	GENE_017991;GENE_022735
GO:0098660	inorganic ion transmembrane transport	biological_process	22	22/ 3414	GENE_004821;GENE_016966;GENE_002067;GENE_022268;GENE_013103;GENE_009848;GENE_011744;GENE_008206;GENE_001298;GENE_022879;GENE_014659;GENE_009944;GENE_003488;GENE_012293;GENE_004040;GENE_023545;GENE_009331;GENE_003972;GENE_017045;GENE_015034;GENE_024246;GENE_022471
GO:0048544	recognition of pollen	biological_process	21	21/ 3414	GENE_017553;GENE_009854;GENE_017542;GENE_006628;GENE_004254;GENE_008273;GENE_006578;GENE_017620;GENE_017521;GENE_017631;GENE_006649;GENE_017615;GENE_004253;GENE_017744;GENE_016290;GENE_017582;GENE_025401;GENE_017563;GENE_017589;GENE_024153;GENE_002459
GO:0030048	actin filament-based movement	biological_process	1	1/ 3414	GENE_017969
GO:0010497	plasmodesmata-mediated intercellular transport	biological_process	1	1/ 3414	GENE_016545
GO:0071695	anatomical structure maturation	biological_process	4	4/ 3414	GENE_013434;GENE_000535;GENE_009202;GENE_017378
GO:1905393	plant organ formation	biological_process	2	2/ 3414	GENE_018548;GENE_011021
GO:0006949	syncytium formation	biological_process	1	1/ 3414	GENE_003322
GO:1905392	plant organ morphogenesis	biological_process	1	1/ 3414	GENE_024206
GO:0001763	morphogenesis of a branching structure	biological_process	1	1/ 3414	GENE_026075
GO:0000902	cell morphogenesis	biological_process	5	5/ 3414	GENE_011472;GENE_024522;GENE_007957;GENE_021500;GENE_004918
GO:0048731	system development	biological_process	12	12/ 3414	GENE_011133;GENE_018751;GENE_013248;GENE_019617;GENE_009402;GENE_016885;GENE_015297;GENE_003180;GENE_001379;GENE_024086;GENE_000556;GENE_006961
GO:0007275	multicellular organism development	biological_process	3	3/ 3414	GENE_021438;GENE_004090;GENE_019483
GO:0048829	root cap development	biological_process	1	1/ 3414	GENE_016537
GO:0009888	tissue development	biological_process	9	9/ 3414	GENE_016598;GENE_011021;GENE_016675;GENE_013783;GENE_016922;GENE_016640;GENE_019291;GENE_002528;GENE_020942
GO:0099402	plant organ development	biological_process	15	15/ 3414	GENE_024206;GENE_017369;GENE_017403;GENE_019567;GENE_001763;GENE_007399;GENE_008826;GENE_024086;GENE_013248;GENE_020050;GENE_008015;GENE_001087;GENE_016785;GENE_001379;GENE_009900
GO:0010150	leaf senescence	biological_process	3	3/ 3414	GENE_015865;GENE_004002;GENE_002321
GO:0048316	seed development	biological_process	2	2/ 3414	GENE_021274;GENE_024237
GO:0010311	lateral root formation	biological_process	1	1/ 3414	GENE_018548
GO:0009640	photomorphogenesis	biological_process	2	2/ 3414	GENE_001403;GENE_024381
GO:0090567	reproductive shoot system development	biological_process	2	2/ 3414	GENE_003180;GENE_019617
GO:0090696	post-embryonic plant organ development	biological_process	2	2/ 3414	GENE_024206;GENE_017403
GO:0009790	embryo development	biological_process	3	3/ 3414	GENE_021438;GENE_004090;GENE_019483
GO:0065001	specification of axis polarity	biological_process	2	2/ 3414	GENE_009077;GENE_003936
GO:0003002	regionalization	biological_process	2	2/ 3414	GENE_020050;GENE_020942
GO:0009615	response to virus	biological_process	2	2/ 3414	GENE_013354;GENE_012171
GO:0009617	response to bacterium	biological_process	17	17/ 3414	GENE_023314;GENE_006848;GENE_019584;GENE_020314;GENE_003530;GENE_020311;GENE_023277;GENE_023125;GENE_009995;GENE_018819;GENE_018779;GENE_018853;GENE_008790;GENE_023028;GENE_023368;GENE_003180;GENE_015795
GO:0009620	response to fungus	biological_process	36	36/ 3414	GENE_018800;GENE_024206;GENE_020427;GENE_006857;GENE_008790;GENE_018821;GENE_018060;GENE_014817;GENE_004520;GENE_018829;GENE_003682;GENE_024840;GENE_003687;GENE_018089;GENE_000992;GENE_004155;GENE_015420;GENE_024257;GENE_023608;GENE_023609;GENE_002467;GENE_021498;GENE_015547;GENE_018921;GENE_014941;GENE_003180;GENE_019069;GENE_021005;GENE_017007;GENE_003695;GENE_025794;GENE_020032;GENE_018135;GEN…
GO:0098542	defense response to other organism	biological_process	64	64/ 3414	GENE_024206;GENE_011533;GENE_020427;GENE_013354;GENE_003213;GENE_006857;GENE_005781;GENE_023277;GENE_021104;GENE_023125;GENE_009995;GENE_018821;GENE_018060;GENE_018800;GENE_021488;GENE_004520;GENE_018829;GENE_005450;GENE_003682;GENE_023368;GENE_003687;GENE_000992;GENE_021376;GENE_021504;GENE_021498;GENE_004155;GENE_015420;GENE_024257;GENE_017073;GENE_023608;GENE_023609;GENE_018089;GENE_018819;GEN…
GO:0009608	response to symbiont	biological_process	6	6/ 3414	GENE_024840;GENE_015547;GENE_025794;GENE_014941;GENE_018793;GENE_014817
GO:0002239	response to oomycetes	biological_process	11	11/ 3414	GENE_023314;GENE_006848;GENE_019584;GENE_020314;GENE_020311;GENE_023277;GENE_023125;GENE_009995;GENE_018819;GENE_018779;GENE_018853
GO:0051702	biological process involved in interaction with symbiont	biological_process	5	5/ 3414	GENE_017275;GENE_003213;GENE_011260;GENE_016082;GENE_021104
GO:0051701	biological process involved in interaction with host	biological_process	2	2/ 3414	GENE_011623;GENE_016545
GO:0060560	developmental growth involved in morphogenesis	biological_process	2	2/ 3414	GENE_024522;GENE_007957
GO:0051644	plastid localization	biological_process	1	1/ 3414	GENE_007900
GO:0051656	establishment of organelle localization	biological_process	1	1/ 3414	GENE_007900
GO:0019915	lipid storage	biological_process	1	1/ 3414	GENE_001608
GO:0045185	maintenance of protein location	biological_process	1	1/ 3414	GENE_021498
GO:0051651	maintenance of location in cell	biological_process	1	1/ 3414	GENE_021498
GO:0045184	establishment of protein localization	biological_process	32	32/ 3414	GENE_022942;GENE_008903;GENE_014362;GENE_006974;GENE_013374;GENE_013334;GENE_015513;GENE_021202;GENE_004152;GENE_023078;GENE_018535;GENE_009848;GENE_022628;GENE_009062;GENE_009109;GENE_013326;GENE_003999;GENE_001969;GENE_021498;GENE_005728;GENE_011098;GENE_000463;GENE_009944;GENE_004558;GENE_013532;GENE_006721;GENE_010422;GENE_016433;GENE_021126;GENE_007309;GENE_014682;GENE_002363
GO:0051649	establishment of localization in cell	biological_process	17	17/ 3414	GENE_007900;GENE_004821;GENE_003999;GENE_001969;GENE_014362;GENE_022268;GENE_006974;GENE_009848;GENE_013532;GENE_002072;GENE_021126;GENE_023078;GENE_021498;GENE_000463;GENE_009944;GENE_018983;GENE_006721
GO:0051236	establishment of RNA localization	biological_process	1	1/ 3414	GENE_000463
GO:0006810	transport	biological_process	163	163/ 3414	GENE_010171;GENE_010844;GENE_006974;GENE_020696;GENE_013374;GENE_024904;GENE_008903;GENE_011744;GENE_007969;GENE_019417;GENE_020546;GENE_015513;GENE_011642;GENE_016139;GENE_002968;GENE_004152;GENE_002380;GENE_026220;GENE_013141;GENE_013334;GENE_023545;GENE_011176;GENE_025382;GENE_025064;GENE_008206;GENE_001969;GENE_014693;GENE_007539;GENE_001298;GENE_011098;GENE_000463;GENE_013974;GENE_018983;GEN…
GO:0033037	polysaccharide localization	biological_process	1	1/ 3414	GENE_003180
GO:0046739	transport of virus in multicellular host	biological_process	1	1/ 3414	GENE_016545
GO:0071585	detoxification of cadmium ion	biological_process	1	1/ 3414	GENE_010917
GO:0010273	detoxification of copper ion	biological_process	1	1/ 3414	GENE_010917
GO:0043207	response to external biotic stimulus	biological_process	107	107/ 3414	GENE_019847;GENE_023125;GENE_018821;GENE_020427;GENE_018829;GENE_021504;GENE_004155;GENE_023877;GENE_024257;GENE_023608;GENE_023609;GENE_003530;GENE_012171;GENE_018853;GENE_003180;GENE_018010;GENE_021005;GENE_017007;GENE_018014;GENE_012877;GENE_025794;GENE_012872;GENE_020032;GENE_023861;GENE_010371;GENE_025016;GENE_024206;GENE_011533;GENE_018060;GENE_013354;GENE_003213;GENE_003626;GENE_023028;GEN…
GO:0009606	tropism	biological_process	8	8/ 3414	GENE_021765;GENE_016444;GENE_001763;GENE_002969;GENE_020275;GENE_012136;GENE_002129;GENE_009052
GO:0009991	response to extracellular stimulus	biological_process	7	7/ 3414	GENE_024206;GENE_023078;GENE_009674;GENE_009661;GENE_021331;GENE_016821;GENE_002839
GO:0009581	detection of external stimulus	biological_process	1	1/ 3414	GENE_004438
GO:0009612	response to mechanical stimulus	biological_process	2	2/ 3414	GENE_021765;GENE_004438
GO:0071496	cellular response to external stimulus	biological_process	5	5/ 3414	GENE_009661;GENE_016821;GENE_009674;GENE_002839;GENE_023078
GO:0071495	cellular response to endogenous stimulus	biological_process	2	2/ 3414	GENE_001769;GENE_001586
GO:0009725	response to hormone	biological_process	27	27/ 3414	GENE_024340;GENE_024206;GENE_020850;GENE_003628;GENE_009450;GENE_024065;GENE_016375;GENE_006652;GENE_001058;GENE_021794;GENE_013617;GENE_021500;GENE_008896;GENE_013147;GENE_008112;GENE_024217;GENE_001481;GENE_021498;GENE_020967;GENE_025556;GENE_024522;GENE_012019;GENE_025610;GENE_024074;GENE_001148;GENE_003180;GENE_009035
GO:0009611	response to wounding	biological_process	3	3/ 3414	GENE_016568;GENE_009674;GENE_009661
GO:0042594	response to starvation	biological_process	3	3/ 3414	GENE_002839;GENE_016821;GENE_023078
GO:0009409	response to cold	biological_process	5	5/ 3414	GENE_002504;GENE_009674;GENE_001058;GENE_012259;GENE_009661
GO:0009408	response to heat	biological_process	7	7/ 3414	GENE_006303;GENE_016423;GENE_022743;GENE_023032;GENE_023874;GENE_004124;GENE_003180
GO:0006952	defense response	biological_process	168	168/ 3414	GENE_019847;GENE_015197;GENE_023125;GENE_018438;GENE_018821;GENE_020427;GENE_024700;GENE_018430;GENE_018829;GENE_018435;GENE_019411;GENE_020302;GENE_006446;GENE_021504;GENE_004155;GENE_023877;GENE_024257;GENE_023608;GENE_023609;GENE_016039;GENE_015065;GENE_002111;GENE_003530;GENE_002114;GENE_012171;GENE_025241;GENE_018853;GENE_002054;GENE_003180;GENE_018010;GENE_021005;GENE_017007;GENE_002671;GEN…
GO:0006970	response to osmotic stress	biological_process	5	5/ 3414	GENE_004124;GENE_024246;GENE_012019;GENE_009674;GENE_009661
GO:0006979	response to oxidative stress	biological_process	28	28/ 3414	GENE_001248;GENE_006612;GENE_018478;GENE_005876;GENE_002194;GENE_023620;GENE_000524;GENE_003514;GENE_023720;GENE_010304;GENE_021935;GENE_023156;GENE_000868;GENE_011680;GENE_011098;GENE_007184;GENE_018835;GENE_004124;GENE_003180;GENE_004002;GENE_022434;GENE_019028;GENE_023619;GENE_005863;GENE_004612;GENE_004590;GENE_005868;GENE_023906
GO:0009414	response to water deprivation	biological_process	9	9/ 3414	GENE_009674;GENE_009661;GENE_023875;GENE_023874;GENE_012019;GENE_008664;GENE_014567;GENE_001058;GENE_018738
GO:1901700	response to oxygen-containing compound	biological_process	28	28/ 3414	GENE_020850;GENE_012582;GENE_003628;GENE_006652;GENE_001058;GENE_017403;GENE_014567;GENE_021500;GENE_009661;GENE_021794;GENE_023875;GENE_023874;GENE_021498;GENE_020967;GENE_024522;GENE_012019;GENE_025610;GENE_004124;GENE_001148;GENE_003180;GENE_018738;GENE_001769;GENE_009674;GENE_022434;GENE_009035;GENE_008664;GENE_004612;GENE_001586
GO:1902074	response to salt	biological_process	10	10/ 3414	GENE_009674;GENE_009661;GENE_023875;GENE_023874;GENE_012019;GENE_003628;GENE_008664;GENE_014567;GENE_001058;GENE_018738
GO:1901698	response to nitrogen compound	biological_process	5	5/ 3414	GENE_001769;GENE_001148;GENE_019858;GENE_012582;GENE_001586
GO:0001101	response to acid chemical	biological_process	9	9/ 3414	GENE_009674;GENE_009661;GENE_023875;GENE_023874;GENE_012019;GENE_008664;GENE_014567;GENE_001058;GENE_018738
GO:0010035	response to inorganic substance	biological_process	18	18/ 3414	GENE_022434;GENE_021274;GENE_008664;GENE_023522;GENE_009674;GENE_003180;GENE_009661;GENE_011623;GENE_023875;GENE_023874;GENE_012019;GENE_018793;GENE_010917;GENE_004124;GENE_014567;GENE_001058;GENE_018738;GENE_004612
GO:0010033	response to organic substance	biological_process	47	47/ 3414	GENE_024340;GENE_024206;GENE_014567;GENE_020850;GENE_024065;GENE_012582;GENE_003628;GENE_016375;GENE_006652;GENE_001058;GENE_021794;GENE_017403;GENE_001712;GENE_021498;GENE_021500;GENE_009661;GENE_008896;GENE_023875;GENE_023874;GENE_001481;GENE_013147;GENE_008112;GENE_009450;GENE_023315;GENE_019858;GENE_013617;GENE_012987;GENE_020967;GENE_025556;GENE_024522;GENE_012019;GENE_025610;GENE_024074;GEN…
GO:0009582	detection of abiotic stimulus	biological_process	1	1/ 3414	GENE_004438
GO:0009266	response to temperature stimulus	biological_process	12	12/ 3414	GENE_006303;GENE_016423;GENE_022743;GENE_002504;GENE_009674;GENE_023032;GENE_023874;GENE_012259;GENE_001058;GENE_004124;GENE_009661;GENE_003180
GO:0009314	response to radiation	biological_process	17	17/ 3414	GENE_001403;GENE_007231;GENE_025512;GENE_007474;GENE_009674;GENE_009661;GENE_011623;GENE_022218;GENE_012136;GENE_024381;GENE_004487;GENE_015875;GENE_017798;GENE_016835;GENE_002129;GENE_002759;GENE_009052
GO:0009629	response to gravity	biological_process	4	4/ 3414	GENE_001763;GENE_016444;GENE_002129;GENE_020275
GO:0009415	response to water	biological_process	9	9/ 3414	GENE_009674;GENE_009661;GENE_023875;GENE_023874;GENE_012019;GENE_008664;GENE_014567;GENE_001058;GENE_018738
GO:0071214	cellular response to abiotic stimulus	biological_process	6	6/ 3414	GENE_009674;GENE_009661;GENE_011623;GENE_022218;GENE_017798;GENE_007231
GO:0000785	chromatin	cellular_component	4	4/ 3414	GENE_006152;GENE_021137;GENE_020986;GENE_000556
GO:0000786	nucleosome	cellular_component	6	6/ 3414	GENE_012608;GENE_003214;GENE_016091;GENE_016502;GENE_018174;GENE_018738
GO:0036387	pre-replicative complex	cellular_component	2	2/ 3414	GENE_017403;GENE_019489
GO:0031261	DNA replication preinitiation complex	cellular_component	2	2/ 3414	GENE_002729;GENE_017403
GO:0008622	epsilon DNA polymerase complex	cellular_component	1	1/ 3414	GENE_023874
GO:0070603	SWI/SNF superfamily-type complex	cellular_component	2	2/ 3414	GENE_001403;GENE_023874
GO:0000118	histone deacetylase complex	cellular_component	1	1/ 3414	GENE_020128
GO:0008023	transcription elongation factor complex	cellular_component	1	1/ 3414	GENE_001291
GO:0044613	nuclear pore central transport channel	cellular_component	1	1/ 3414	GENE_000463
GO:0030896	checkpoint clamp complex	cellular_component	1	1/ 3414	GENE_005014
GO:0055029	nuclear DNA-directed RNA polymerase complex	cellular_component	2	2/ 3414	GENE_020417;GENE_003795
GO:0000152	nuclear ubiquitin ligase complex	cellular_component	1	1/ 3414	GENE_020656
GO:0016592	mediator complex	cellular_component	1	1/ 3414	GENE_023116
GO:0005664	nuclear origin of replication recognition complex	cellular_component	1	1/ 3414	GENE_017403
GO:0019908	nuclear cyclin-dependent protein kinase holoenzyme complex	cellular_component	1	1/ 3414	GENE_001291
GO:0005656	nuclear pre-replicative complex	cellular_component	2	2/ 3414	GENE_017403;GENE_019489
GO:0035097	histone methyltransferase complex	cellular_component	1	1/ 3414	GENE_001403
GO:0090575	RNA polymerase II transcription regulator complex	cellular_component	7	7/ 3414	GENE_005358;GENE_025033;GENE_009039;GENE_013037;GENE_005542;GENE_000831;GENE_023581
GO:0032807	DNA ligase IV complex	cellular_component	1	1/ 3414	GENE_016835
GO:0032806	carboxy-terminal domain protein kinase complex	cellular_component	1	1/ 3414	GENE_001291
GO:0000347	THO complex	cellular_component	2	2/ 3414	GENE_018750;GENE_013435
GO:0005643	nuclear pore	cellular_component	1	1/ 3414	GENE_013612
GO:0005958	DNA-dependent protein kinase-DNA ligase 4 complex	cellular_component	1	1/ 3414	GENE_016835
GO:0000015	phosphopyruvate hydratase complex	cellular_component	1	1/ 3414	GENE_004918
GO:0030286	dynein complex	cellular_component	1	1/ 3414	GENE_011268
GO:0070069	cytochrome complex	cellular_component	1	1/ 3414	GENE_015034
GO:1905360	GTPase complex	cellular_component	2	2/ 3414	GENE_019704;GENE_024206
GO:1903293	phosphatase complex	cellular_component	2	2/ 3414	GENE_013553;GENE_010184
GO:1990204	oxidoreductase complex	cellular_component	2	2/ 3414	GENE_003727;GENE_009501
GO:1990234	transferase complex	cellular_component	20	20/ 3414	GENE_005279;GENE_001403;GENE_024206;GENE_023315;GENE_001291;GENE_001712;GENE_013253;GENE_003795;GENE_022069;GENE_005092;GENE_010619;GENE_010244;GENE_023874;GENE_022218;GENE_004651;GENE_020656;GENE_005748;GENE_020417;GENE_001257;GENE_022120
GO:1905368	peptidase complex	cellular_component	3	3/ 3414	GENE_021903;GENE_018982;GENE_000950
GO:0009337	sulfite reductase complex (NADPH)	cellular_component	1	1/ 3414	GENE_018036
GO:1990391	DNA repair complex	cellular_component	1	1/ 3414	GENE_016835
GO:1904949	ATPase complex	cellular_component	2	2/ 3414	GENE_001403;GENE_023874
GO:0032299	ribonuclease H2 complex	cellular_component	1	1/ 3414	GENE_013279
GO:0005787	signal peptidase complex	cellular_component	1	1/ 3414	GENE_000950
GO:0031201	SNARE complex	cellular_component	4	4/ 3414	GENE_009062;GENE_007309;GENE_009109;GENE_021498
GO:0098797	plasma membrane protein complex	cellular_component	2	2/ 3414	GENE_019704;GENE_024206
GO:0033178	proton-transporting two-sector ATPase complex, catalytic domain	cellular_component	5	5/ 3414	GENE_015341;GENE_000003;GENE_008409;GENE_010161;GENE_008404
GO:0009654	photosystem II oxygen evolving complex	cellular_component	1	1/ 3414	GENE_003727
GO:0098803	respiratory chain complex	cellular_component	1	1/ 3414	GENE_015034
GO:0030117	membrane coat	cellular_component	3	3/ 3414	GENE_010844;GENE_001969;GENE_004558
GO:0009521	photosystem	cellular_component	4	4/ 3414	GENE_022722;GENE_025512;GENE_004528;GENE_008371
GO:0033177	proton-transporting two-sector ATPase complex, proton-transporting domain	cellular_component	1	1/ 3414	GENE_001622
GO:0005762	mitochondrial large ribosomal subunit	cellular_component	1	1/ 3414	GENE_011528
GO:0000145	exocyst	cellular_component	3	3/ 3414	GENE_016433;GENE_010422;GENE_018535
GO:0017053	transcription repressor complex	cellular_component	1	1/ 3414	GENE_005040
GO:0031262	Ndc80 complex	cellular_component	1	1/ 3414	GENE_018649
GO:0048500	signal recognition particle	cellular_component	1	1/ 3414	GENE_021126
GO:0030684	preribosome	cellular_component	1	1/ 3414	GENE_012171
GO:0044391	ribosomal subunit	cellular_component	6	6/ 3414	GENE_008405;GENE_006869;GENE_011528;GENE_010364;GENE_007771;GENE_025029
GO:0000502	proteasome complex	cellular_component	2	2/ 3414	GENE_021903;GENE_018982
GO:0042575	DNA polymerase complex	cellular_component	2	2/ 3414	GENE_023874;GENE_004651
GO:0000151	ubiquitin ligase complex	cellular_component	5	5/ 3414	GENE_020656;GENE_024206;GENE_022218;GENE_022120;GENE_005092
GO:0030880	RNA polymerase complex	cellular_component	3	3/ 3414	GENE_010244;GENE_020417;GENE_003795
GO:0031248	protein acetyltransferase complex	cellular_component	1	1/ 3414	GENE_005279
GO:0070419	nonhomologous end joining complex	cellular_component	1	1/ 3414	GENE_016835
GO:0043233	organelle lumen	cellular_component	6	6/ 3414	GENE_002859;GENE_001743;GENE_013963;GENE_008884;GENE_025089;GENE_017968
GO:0031967	organelle envelope	cellular_component	1	1/ 3414	GENE_006637
GO:0035371	microtubule plus-end	cellular_component	1	1/ 3414	GENE_021765
GO:0043229	intracellular organelle	cellular_component	532	532/ 3414	GENE_013464;GENE_012481;GENE_025707;GENE_024381;GENE_007731;GENE_023462;GENE_011623;GENE_012965;GENE_016159;GENE_018531;GENE_018532;GENE_016135;GENE_008306;GENE_024983;GENE_013147;GENE_009165;GENE_020909;GENE_010140;GENE_012665;GENE_003733;GENE_002359;GENE_021596;GENE_016219;GENE_001253;GENE_007023;GENE_001257;GENE_003180;GENE_007024;GENE_026037;GENE_019617;GENE_026032;GENE_024709;GENE_019751;GEN…
GO:0043228	non-membrane-bounded organelle	cellular_component	40	40/ 3414	GENE_009898;GENE_018864;GENE_003214;GENE_024027;GENE_013198;GENE_006504;GENE_005434;GENE_000660;GENE_003411;GENE_021054;GENE_007771;GENE_021030;GENE_022369;GENE_021442;GENE_006585;GENE_009921;GENE_010364;GENE_002339;GENE_005664;GENE_025029;GENE_005702;GENE_024798;GENE_011528;GENE_012171;GENE_000752;GENE_003343;GENE_021640;GENE_023881;GENE_020829;GENE_018036;GENE_000250;GENE_020077;GENE_021457;GEN…
GO:0043227	membrane-bounded organelle	cellular_component	503	503/ 3414	GENE_013464;GENE_012481;GENE_025707;GENE_024381;GENE_007731;GENE_017847;GENE_011623;GENE_012965;GENE_016159;GENE_018531;GENE_018532;GENE_008306;GENE_024983;GENE_013147;GENE_009165;GENE_020909;GENE_010140;GENE_012665;GENE_003733;GENE_002359;GENE_021596;GENE_016219;GENE_001253;GENE_007023;GENE_001257;GENE_003180;GENE_007024;GENE_026037;GENE_019617;GENE_026032;GENE_024709;GENE_019751;GENE_021125;GEN…
GO:0031090	organelle membrane	cellular_component	64	64/ 3414	GENE_022942;GENE_012658;GENE_015618;GENE_005003;GENE_011478;GENE_006974;GENE_014282;GENE_000141;GENE_017991;GENE_001608;GENE_024904;GENE_016194;GENE_025512;GENE_000003;GENE_025430;GENE_014958;GENE_002397;GENE_009477;GENE_017623;GENE_021678;GENE_022268;GENE_003488;GENE_024255;GENE_022643;GENE_023545;GENE_013308;GENE_011744;GENE_009166;GENE_025382;GENE_025064;GENE_009900;GENE_012095;GENE_019858;GEN…
GO:0019867	outer membrane	cellular_component	10	10/ 3414	GENE_012658;GENE_025512;GENE_018676;GENE_022352;GENE_001940;GENE_001353;GENE_002397;GENE_013308;GENE_000003;GENE_014958
GO:0005886	plasma membrane	cellular_component	172	172/ 3414	GENE_020088;GENE_012562;GENE_004090;GENE_023125;GENE_021580;GENE_006320;GENE_023128;GENE_020612;GENE_022039;GENE_011642;GENE_014856;GENE_015907;GENE_019318;GENE_013063;GENE_004155;GENE_000013;GENE_020226;GENE_022933;GENE_021310;GENE_025148;GENE_016630;GENE_013476;GENE_006554;GENE_014041;GENE_003530;GENE_006801;GENE_019303;GENE_018853;GENE_014969;GENE_011884;GENE_013974;GENE_016398;GENE_020531;GEN…
GO:0034357	photosynthetic membrane	cellular_component	4	4/ 3414	GENE_002397;GENE_000003;GENE_001940;GENE_025512
GO:0098590	plasma membrane region	cellular_component	3	3/ 3414	GENE_010195;GENE_022614;GENE_025433
GO:0031012	extracellular matrix	cellular_component	2	2/ 3414	GENE_000883;GENE_009395
GO:0005618	cell wall	cellular_component	8	8/ 3414	GENE_006612;GENE_023720;GENE_001510;GENE_002194;GENE_023619;GENE_018835;GENE_023906;GENE_019028
GO:0070161	anchoring junction	cellular_component	9	9/ 3414	GENE_021488;GENE_019672;GENE_021376;GENE_021504;GENE_016545;GENE_003601;GENE_009357;GENE_009424;GENE_007816
GO:0098791	Golgi apparatus subcompartment	cellular_component	2	2/ 3414	GENE_016821;GENE_021498
GO:0048046	apoplast	cellular_component	33	33/ 3414	GENE_010640;GENE_024109;GENE_013534;GENE_024209;GENE_012066;GENE_018640;GENE_024040;GENE_006652;GENE_001698;GENE_005890;GENE_016134;GENE_006142;GENE_001775;GENE_011816;GENE_019050;GENE_023818;GENE_017909;GENE_007210;GENE_010730;GENE_013085;GENE_018870;GENE_008560;GENE_018710;GENE_018858;GENE_011845;GENE_013291;GENE_005841;GENE_018351;GENE_023804;GENE_005821;GENE_016140;GENE_020274;GENE_016163
GO:0009570	chloroplast stroma	cellular_component	6	6/ 3414	GENE_005177;GENE_018036;GENE_019897;GENE_023446;GENE_000811;GENE_019651
GO:0042646	plastid nucleoid	cellular_component	1	1/ 3414	GENE_018036
GO:0000776	kinetochore	cellular_component	3	3/ 3414	GENE_021442;GENE_021054;GENE_003411
GO:0035770	ribonucleoprotein granule	cellular_component	1	1/ 3414	GENE_009921
GO:0099081	supramolecular polymer	cellular_component	27	27/ 3414	GENE_009898;GENE_016599;GENE_025884;GENE_013372;GENE_011268;GENE_005434;GENE_025864;GENE_020994;GENE_021442;GENE_025023;GENE_011179;GENE_010736;GENE_013345;GENE_011681;GENE_001022;GENE_017530;GENE_001067;GENE_003343;GENE_005119;GENE_018055;GENE_007804;GENE_022044;GENE_002839;GENE_021765;GENE_023091;GENE_019382;GENE_000819
GO:0008135	translation factor activity, RNA binding	molecular_function	6	6/ 3414	GENE_019953;GENE_019751;GENE_021178;GENE_005595;GENE_013977;GENE_023603
GO:0003714	transcription corepressor activity	molecular_function	1	1/ 3414	GENE_001460
GO:0003713	transcription coactivator activity	molecular_function	2	2/ 3414	GENE_008826;GENE_012826
GO:0016987	sigma factor activity	molecular_function	2	2/ 3414	GENE_017798;GENE_007231
GO:0000981	DNA-binding transcription factor activity, RNA polymerase II-specific	molecular_function	22	22/ 3414	GENE_003072;GENE_019377;GENE_012005;GENE_022056;GENE_014726;GENE_011936;GENE_012255;GENE_022817;GENE_023581;GENE_005358;GENE_009960;GENE_025036;GENE_009981;GENE_005542;GENE_021459;GENE_026037;GENE_025033;GENE_013037;GENE_007145;GENE_007324;GENE_000831;GENE_012268
GO:0001216	DNA-binding transcription activator activity	molecular_function	3	3/ 3414	GENE_005542;GENE_005358;GENE_023581
GO:0003724	RNA helicase activity	molecular_function	2	2/ 3414	GENE_000486;GENE_021364
GO:0008574	plus-end-directed microtubule motor activity	molecular_function	1	1/ 3414	GENE_009898
GO:0003678	DNA helicase activity	molecular_function	4	4/ 3414	GENE_025004;GENE_018864;GENE_010308;GENE_001977
GO:0140658	ATP-dependent chromatin remodeler activity	molecular_function	4	4/ 3414	GENE_011623;GENE_017549;GENE_022091;GENE_012703
GO:0003918	DNA topoisomerase type II (double strand cut, ATP-hydrolyzing) activity	molecular_function	1	1/ 3414	GENE_017973
GO:0015616	DNA translocase activity	molecular_function	1	1/ 3414	GENE_011623
GO:0004467	long-chain fatty acid-CoA ligase activity	molecular_function	2	2/ 3414	GENE_024066;GENE_010718
GO:0140359	ABC-type transporter activity	molecular_function	40	40/ 3414	GENE_001973;GENE_015497;GENE_017389;GENE_020696;GENE_005141;GENE_024904;GENE_019820;GENE_020289;GENE_019417;GENE_006546;GENE_014915;GENE_017406;GENE_000322;GENE_005328;GENE_006468;GENE_000688;GENE_014590;GENE_005588;GENE_017339;GENE_025064;GENE_005704;GENE_005159;GENE_017341;GENE_018037;GENE_015466;GENE_020563;GENE_005226;GENE_005422;GENE_001373;GENE_003832;GENE_001893;GENE_001541;GENE_001896;GEN…
GO:0140358	P-type transmembrane transporter activity	molecular_function	6	6/ 3414	GENE_004797;GENE_014929;GENE_010869;GENE_001298;GENE_017847;GENE_018026
GO:0019829	ATPase-coupled monoatomic cation transmembrane transporter activity	molecular_function	10	10/ 3414	GENE_004797;GENE_001622;GENE_014929;GENE_013351;GENE_010869;GENE_001615;GENE_001298;GENE_000003;GENE_018026;GENE_017847
GO:0015450	protein-transporting ATPase activity	molecular_function	1	1/ 3414	GENE_003999
GO:0042625	ATPase-coupled ion transmembrane transporter activity	molecular_function	2	2/ 3414	GENE_001622;GENE_000003
GO:0035591	signaling adaptor activity	molecular_function	1	1/ 3414	GENE_024206
GO:0005484	SNAP receptor activity	molecular_function	5	5/ 3414	GENE_009062;GENE_021498;GENE_007309;GENE_009109;GENE_014362
GO:0043495	protein-membrane adaptor activity	molecular_function	1	1/ 3414	GENE_021498
GO:0140825	lactoperoxidase activity	molecular_function	18	18/ 3414	GENE_006612;GENE_003514;GENE_023720;GENE_023619;GENE_010304;GENE_021935;GENE_023156;GENE_011680;GENE_023906;GENE_001248;GENE_005876;GENE_002194;GENE_023620;GENE_005863;GENE_018835;GENE_005868;GENE_000524;GENE_019028
GO:0005548	phospholipid transporter activity	molecular_function	3	3/ 3414	GENE_018619;GENE_024594;GENE_025930
GO:0120013	lipid transfer activity	molecular_function	2	2/ 3414	GENE_025930;GENE_024594
GO:0015248	sterol transporter activity	molecular_function	1	1/ 3414	GENE_021118
GO:0046624	sphingolipid transporter activity	molecular_function	2	2/ 3414	GENE_025930;GENE_024594
GO:0140303	intramembrane lipid transporter activity	molecular_function	5	5/ 3414	GENE_002968;GENE_000101;GENE_002958;GENE_020531;GENE_003658
GO:0008320	protein transmembrane transporter activity	molecular_function	1	1/ 3414	GENE_003999
GO:0042887	amide transmembrane transporter activity	molecular_function	13	13/ 3414	GENE_013326;GENE_005728;GENE_007951;GENE_006637;GENE_021202;GENE_015697;GENE_024904;GENE_021274;GENE_016829;GENE_000133;GENE_014682;GENE_013374;GENE_025064
GO:0015603	iron chelate transmembrane transporter activity	molecular_function	1	1/ 3414	GENE_021274
GO:0015605	organophosphate ester transmembrane transporter activity	molecular_function	9	9/ 3414	GENE_025100;GENE_005521;GENE_005003;GENE_011478;GENE_006637;GENE_004452;GENE_001994;GENE_017991;GENE_022735
GO:0015101	organic cation transmembrane transporter activity	molecular_function	1	1/ 3414	GENE_006320
GO:1901702	salt transmembrane transporter activity	molecular_function	42	42/ 3414	GENE_004821;GENE_006954;GENE_005003;GENE_001856;GENE_010869;GENE_018602;GENE_004040;GENE_021057;GENE_017991;GENE_013103;GENE_018026;GENE_011642;GENE_020546;GENE_014567;GENE_000248;GENE_018782;GENE_011176;GENE_022879;GENE_022268;GENE_003488;GENE_014041;GENE_015355;GENE_020783;GENE_007656;GENE_000133;GENE_022471;GENE_013974;GENE_017847;GENE_023545;GENE_009331;GENE_004797;GENE_003972;GENE_009273;GEN…
GO:1901682	sulfur compound transmembrane transporter activity	molecular_function	7	7/ 3414	GENE_004821;GENE_014929;GENE_022268;GENE_020783;GENE_014305;GENE_000248;GENE_018026
GO:0008514	organic anion transmembrane transporter activity	molecular_function	27	27/ 3414	GENE_020874;GENE_013334;GENE_005003;GENE_011478;GENE_004821;GENE_017991;GENE_006320;GENE_022268;GENE_006637;GENE_000588;GENE_007271;GENE_012532;GENE_016949;GENE_026210;GENE_005521;GENE_002548;GENE_008522;GENE_000133;GENE_005534;GENE_023467;GENE_001994;GENE_006708;GENE_004452;GENE_015697;GENE_000987;GENE_019006;GENE_022735
GO:0005342	organic acid transmembrane transporter activity	molecular_function	23	23/ 3414	GENE_020874;GENE_013334;GENE_016949;GENE_004821;GENE_006320;GENE_011478;GENE_022268;GENE_006637;GENE_000588;GENE_007271;GENE_012532;GENE_005534;GENE_005521;GENE_002548;GENE_008522;GENE_000133;GENE_023467;GENE_026210;GENE_006708;GENE_004452;GENE_015697;GENE_000987;GENE_019006
GO:0015144	carbohydrate transmembrane transporter activity	molecular_function	10	10/ 3414	GENE_013938;GENE_022353;GENE_008293;GENE_007503;GENE_024058;GENE_024069;GENE_017518;GENE_022611;GENE_003355;GENE_009360
GO:0022803	passive transmembrane transporter activity	molecular_function	45	45/ 3414	GENE_000872;GENE_024201;GENE_015367;GENE_015341;GENE_001856;GENE_018602;GENE_000003;GENE_020546;GENE_022568;GENE_006954;GENE_021295;GENE_016853;GENE_011371;GENE_014567;GENE_011400;GENE_026324;GENE_024192;GENE_018782;GENE_013512;GENE_003207;GENE_019877;GENE_010161;GENE_011347;GENE_013476;GENE_010876;GENE_021497;GENE_013479;GENE_001353;GENE_015355;GENE_001374;GENE_024073;GENE_017532;GENE_003248;GEN…
GO:0022804	active transmembrane transporter activity	molecular_function	117	117/ 3414	GENE_015056;GENE_024224;GENE_020696;GENE_005141;GENE_014590;GENE_024904;GENE_013334;GENE_000003;GENE_019417;GENE_022883;GENE_009360;GENE_017406;GENE_000322;GENE_026220;GENE_000248;GENE_012532;GENE_017339;GENE_025064;GENE_010140;GENE_001622;GENE_015466;GENE_003832;GENE_001893;GENE_022353;GENE_001541;GENE_001896;GENE_016736;GENE_000311;GENE_000816;GENE_017323;GENE_022611;GENE_001973;GENE_020874;GEN…
GO:0090482	vitamin transmembrane transporter activity	molecular_function	1	1/ 3414	GENE_006637
GO:0022884	macromolecule transmembrane transporter activity	molecular_function	1	1/ 3414	GENE_003999
GO:1901505	carbohydrate derivative transmembrane transporter activity	molecular_function	12	12/ 3414	GENE_010160;GENE_025100;GENE_005521;GENE_005003;GENE_001994;GENE_004452;GENE_001339;GENE_017991;GENE_015753;GENE_001589;GENE_022735;GENE_010140
GO:0015932	nucleobase-containing compound transmembrane transporter activity	molecular_function	10	10/ 3414	GENE_010160;GENE_010140;GENE_001994;GENE_005003;GENE_006637;GENE_001339;GENE_017991;GENE_015753;GENE_001589;GENE_022735
GO:0015075	monoatomic ion transmembrane transporter activity	molecular_function	72	72/ 3414	GENE_018782;GENE_000872;GENE_006954;GENE_003248;GENE_015341;GENE_003744;GENE_013351;GENE_010869;GENE_002385;GENE_024069;GENE_001615;GENE_013974;GENE_021057;GENE_000003;GENE_013103;GENE_018026;GENE_003355;GENE_021295;GENE_001622;GENE_011642;GENE_011666;GENE_011400;GENE_026324;GENE_009273;GENE_000248;GENE_003488;GENE_008206;GENE_014041;GENE_013512;GENE_011176;GENE_003207;GENE_022879;GENE_019877;GEN…
GO:0072349	modified amino acid transmembrane transporter activity	molecular_function	1	1/ 3414	GENE_006637
GO:1901618	organic hydroxy compound transmembrane transporter activity	molecular_function	1	1/ 3414	GENE_021434
GO:0042910	xenobiotic transmembrane transporter activity	molecular_function	8	8/ 3414	GENE_012095;GENE_024224;GENE_026120;GENE_024896;GENE_002380;GENE_002406;GENE_022883;GENE_017774
GO:0080161	auxin transmembrane transporter activity	molecular_function	1	1/ 3414	GENE_000259
GO:0017077	oxidative phosphorylation uncoupler activity	molecular_function	1	1/ 3414	GENE_002072
GO:0015205	nucleobase transmembrane transporter activity	molecular_function	4	4/ 3414	GENE_007989;GENE_001339;GENE_001589;GENE_015753
GO:0015318	inorganic molecular entity transmembrane transporter activity	molecular_function	65	65/ 3414	GENE_004821;GENE_015367;GENE_024069;GENE_022471;GENE_015341;GENE_003744;GENE_016493;GENE_010869;GENE_002385;GENE_018026;GENE_018602;GENE_015139;GENE_013974;GENE_021057;GENE_000003;GENE_013103;GENE_020546;GENE_003355;GENE_006954;GENE_011642;GENE_014567;GENE_022268;GENE_000248;GENE_003488;GENE_011744;GENE_022879;GENE_016651;GENE_001298;GENE_011176;GENE_001922;GENE_018782;GENE_010161;GENE_001856;GEN…
GO:0008047	enzyme activator activity	molecular_function	11	11/ 3414	GENE_020909;GENE_023078;GENE_016135;GENE_001427;GENE_020656;GENE_001012;GENE_003343;GENE_013589;GENE_013837;GENE_001291;GENE_016089
GO:0004857	enzyme inhibitor activity	molecular_function	31	31/ 3414	GENE_002744;GENE_002671;GENE_002746;GENE_020422;GENE_023025;GENE_007987;GENE_002696;GENE_013825;GENE_004323;GENE_015821;GENE_016568;GENE_019182;GENE_016032;GENE_016617;GENE_006169;GENE_013854;GENE_025084;GENE_013875;GENE_002666;GENE_002713;GENE_012358;GENE_024876;GENE_013836;GENE_019466;GENE_010789;GENE_022419;GENE_016093;GENE_016025;GENE_022296;GENE_002678;GENE_019910
GO:0055106	ubiquitin-protein transferase regulator activity	molecular_function	3	3/ 3414	GENE_020656;GENE_001012;GENE_001427
GO:0019207	kinase regulator activity	molecular_function	12	12/ 3414	GENE_006999;GENE_022419;GENE_001257;GENE_013253;GENE_022069;GENE_010619;GENE_022296;GENE_006728;GENE_003343;GENE_005748;GENE_016617;GENE_001291
GO:0019208	phosphatase regulator activity	molecular_function	11	11/ 3414	GENE_013553;GENE_010184;GENE_002744;GENE_002671;GENE_002746;GENE_002666;GENE_002696;GENE_002678;GENE_012358;GENE_006169;GENE_007987
GO:0060589	nucleoside-triphosphatase regulator activity	molecular_function	3	3/ 3414	GENE_020763;GENE_013837;GENE_023078
GO:0061134	peptidase regulator activity	molecular_function	8	8/ 3414	GENE_019466;GENE_016568;GENE_016025;GENE_016093;GENE_020422;GENE_016032;GENE_004323;GENE_019910
GO:0000774	adenyl-nucleotide exchange factor activity	molecular_function	1	1/ 3414	GENE_012481
GO:0003676	nucleic acid binding	molecular_function	456	456/ 3414	GENE_003647;GENE_013464;GENE_015341;GENE_020549;GENE_025707;GENE_007731;GENE_018539;GENE_012965;GENE_017403;GENE_024983;GENE_009165;GENE_009648;GENE_020909;GENE_018906;GENE_018908;GENE_002359;GENE_023337;GENE_011590;GENE_007024;GENE_011966;GENE_026037;GENE_019617;GENE_026032;GENE_025810;GENE_010462;GENE_019751;GENE_017712;GENE_021126;GENE_021125;GENE_016627;GENE_013669;GENE_022611;GENE_022942;GEN…
GO:0005542	folic acid binding	molecular_function	1	1/ 3414	GENE_010627
GO:1901265	nucleoside phosphate binding	molecular_function	627	627/ 3414	GENE_003647;GENE_024658;GENE_024225;GENE_012562;GENE_001388;GENE_012481;GENE_021012;GENE_010968;GENE_006673;GENE_015294;GENE_016918;GENE_011369;GENE_018306;GENE_016039;GENE_013673;GENE_013363;GENE_015466;GENE_001317;GENE_014969;GENE_025401;GENE_003180;GENE_008169;GENE_020339;GENE_002958;GENE_017322;GENE_017323;GENE_002323;GENE_017081;GENE_022500;GENE_016147;GENE_017087;GENE_014365;GENE_002459;GEN…
GO:0001882	nucleoside binding	molecular_function	1	1/ 3414	GENE_010244
GO:0030975	thiamine binding	molecular_function	1	1/ 3414	GENE_013942
GO:0030976	thiamine pyrophosphate binding	molecular_function	1	1/ 3414	GENE_023616
GO:0046906	tetrapyrrole binding	molecular_function	106	106/ 3414	GENE_024222;GENE_004946;GENE_021586;GENE_021014;GENE_001738;GENE_003809;GENE_022609;GENE_004621;GENE_023620;GENE_010304;GENE_000868;GENE_012735;GENE_026135;GENE_017419;GENE_007184;GENE_001315;GENE_015509;GENE_002813;GENE_009562;GENE_009271;GENE_011653;GENE_009400;GENE_019145;GENE_009404;GENE_019028;GENE_010278;GENE_023906;GENE_024303;GENE_026082;GENE_022946;GENE_022090;GENE_001248;GENE_004528;GEN…
GO:0002054	nucleobase binding	molecular_function	1	1/ 3414	GENE_007101
GO:0070279	vitamin B6 binding	molecular_function	17	17/ 3414	GENE_006338;GENE_003942;GENE_003486;GENE_007397;GENE_020593;GENE_008726;GENE_003968;GENE_014499;GENE_014530;GENE_025184;GENE_015663;GENE_006525;GENE_018626;GENE_025384;GENE_003416;GENE_003406;GENE_012423
GO:0042802	identical protein binding	molecular_function	8	8/ 3414	GENE_001769;GENE_007766;GENE_002859;GENE_015811;GENE_015647;GENE_006169;GENE_017087;GENE_001586
GO:0019899	enzyme binding	molecular_function	6	6/ 3414	GENE_019209;GENE_019858;GENE_000607;GENE_008306;GENE_002064;GENE_008149
GO:0000149	SNARE binding	molecular_function	3	3/ 3414	GENE_010195;GENE_025433;GENE_021498
GO:0051087	protein-folding chaperone binding	molecular_function	4	4/ 3414	GENE_023032;GENE_018884;GENE_004490;GENE_012481
GO:0051082	unfolded protein binding	molecular_function	8	8/ 3414	GENE_018884;GENE_012172;GENE_019603;GENE_023032;GENE_006480;GENE_019656;GENE_004124;GENE_005717
GO:0005516	calmodulin binding	molecular_function	24	24/ 3414	GENE_025644;GENE_014344;GENE_010740;GENE_023530;GENE_009262;GENE_026002;GENE_026026;GENE_020302;GENE_002491;GENE_026040;GENE_013023;GENE_006245;GENE_014370;GENE_016782;GENE_017969;GENE_016952;GENE_017847;GENE_007024;GENE_018034;GENE_017636;GENE_022434;GENE_023598;GENE_004612;GENE_002307
GO:0031072	heat shock protein binding	molecular_function	6	6/ 3414	GENE_020339;GENE_023032;GENE_020928;GENE_020181;GENE_020267;GENE_020178
GO:0045505	dynein intermediate chain binding	molecular_function	1	1/ 3414	GENE_011268
GO:0140030	modification-dependent protein binding	molecular_function	1	1/ 3414	GENE_016667
GO:0005102	signaling receptor binding	molecular_function	8	8/ 3414	GENE_019704;GENE_010980;GENE_000928;GENE_000183;GENE_011564;GENE_022743;GENE_024922;GENE_012409
GO:0008092	cytoskeletal protein binding	molecular_function	41	41/ 3414	GENE_009898;GENE_016599;GENE_025884;GENE_013372;GENE_024027;GENE_005434;GENE_012386;GENE_025864;GENE_006673;GENE_022369;GENE_018518;GENE_018777;GENE_001341;GENE_011179;GENE_010736;GENE_013048;GENE_005628;GENE_017969;GENE_013710;GENE_024798;GENE_022180;GENE_001022;GENE_005442;GENE_017530;GENE_023420;GENE_001067;GENE_003343;GENE_005119;GENE_018055;GENE_023881;GENE_007804;GENE_022044;GENE_021765;GEN…
GO:0046983	protein dimerization activity	molecular_function	62	62/ 3414	GENE_015199;GENE_005358;GENE_000380;GENE_013482;GENE_003214;GENE_016091;GENE_004220;GENE_006504;GENE_018794;GENE_002415;GENE_007766;GENE_022056;GENE_019334;GENE_022526;GENE_025341;GENE_001554;GENE_022668;GENE_002636;GENE_019082;GENE_018745;GENE_016502;GENE_023874;GENE_009280;GENE_016228;GENE_012276;GENE_022644;GENE_003382;GENE_023581;GENE_004442;GENE_016871;GENE_007938;GENE_022758;GENE_025982;GEN…
GO:0043621	protein self-association	molecular_function	3	3/ 3414	GENE_004127;GENE_014653;GENE_004124
GO:0030332	cyclin binding	molecular_function	2	2/ 3414	GENE_023315;GENE_001712
GO:0030276	clathrin binding	molecular_function	2	2/ 3414	GENE_010195;GENE_025433
GO:0008061	chitin binding	molecular_function	20	20/ 3414	GENE_001769;GENE_025186;GENE_008790;GENE_013434;GENE_012945;GENE_025204;GENE_013448;GENE_018921;GENE_025162;GENE_013416;GENE_024257;GENE_025241;GENE_018821;GENE_001586;GENE_018800;GENE_002993;GENE_025165;GENE_018829;GENE_013457;GENE_013432
GO:0032553	ribonucleotide binding	molecular_function	565	565/ 3414	GENE_003647;GENE_012562;GENE_001388;GENE_021012;GENE_010968;GENE_006673;GENE_015294;GENE_016918;GENE_011369;GENE_018306;GENE_016039;GENE_013673;GENE_013363;GENE_015466;GENE_001317;GENE_014969;GENE_025401;GENE_003180;GENE_008169;GENE_020339;GENE_002958;GENE_017322;GENE_017323;GENE_002323;GENE_017081;GENE_022500;GENE_016147;GENE_017087;GENE_002459;GENE_002108;GENE_016952;GENE_024700;GENE_019432;GEN…
GO:0097001	ceramide binding	molecular_function	2	2/ 3414	GENE_025930;GENE_024594
GO:0043169	cation binding	molecular_function	488	488/ 3414	GENE_015266;GENE_024222;GENE_013468;GENE_015612;GENE_025259;GENE_024381;GENE_011083;GENE_018539;GENE_021014;GENE_016134;GENE_021795;GENE_009648;GENE_018306;GENE_002604;GENE_018906;GENE_017394;GENE_023337;GENE_015465;GENE_024135;GENE_007184;GENE_001315;GENE_014966;GENE_015509;GENE_018710;GENE_002813;GENE_019617;GENE_010462;GENE_019751;GENE_002958;GENE_008768;GENE_016620;GENE_019028;GENE_020077;GEN…
GO:0043168	anion binding	molecular_function	650	650/ 3414	GENE_003647;GENE_024658;GENE_024225;GENE_012562;GENE_001388;GENE_021012;GENE_010968;GENE_006673;GENE_018535;GENE_015294;GENE_016918;GENE_011369;GENE_025384;GENE_018306;GENE_016039;GENE_013673;GENE_013363;GENE_015466;GENE_001317;GENE_014969;GENE_015663;GENE_025401;GENE_003180;GENE_008169;GENE_020339;GENE_002958;GENE_017322;GENE_017323;GENE_002323;GENE_017081;GENE_022500;GENE_016147;GENE_017087;GEN…
GO:0005543	phospholipid binding	molecular_function	13	13/ 3414	GENE_025645;GENE_010422;GENE_025930;GENE_024594;GENE_010195;GENE_018535;GENE_012863;GENE_016433;GENE_007235;GENE_013225;GENE_007681;GENE_022614;GENE_025433
GO:0005496	steroid binding	molecular_function	1	1/ 3414	GENE_021118
GO:0005504	fatty acid binding	molecular_function	3	3/ 3414	GENE_020414;GENE_012237;GENE_010371
GO:0019840	isoprenoid binding	molecular_function	9	9/ 3414	GENE_002678;GENE_002744;GENE_002671;GENE_002746;GENE_002666;GENE_002696;GENE_012358;GENE_006169;GENE_007987
GO:0046625	sphingolipid binding	molecular_function	2	2/ 3414	GENE_025930;GENE_024594
GO:0019825	oxygen binding	molecular_function	1	1/ 3414	GENE_024303
GO:0048029	monosaccharide binding	molecular_function	1	1/ 3414	GENE_026195
GO:0043177	organic acid binding	molecular_function	18	18/ 3414	GENE_006920;GENE_012237;GENE_010627;GENE_020414;GENE_022263;GENE_008909;GENE_010371;GENE_006338;GENE_002744;GENE_002671;GENE_002746;GENE_002666;GENE_007987;GENE_023795;GENE_002696;GENE_012358;GENE_006169;GENE_002678
GO:0043178	alcohol binding	molecular_function	11	11/ 3414	GENE_012358;GENE_002678;GENE_016821;GENE_002744;GENE_002671;GENE_002746;GENE_002666;GENE_002696;GENE_013942;GENE_006169;GENE_007987
GO:0019842	vitamin binding	molecular_function	20	20/ 3414	GENE_006338;GENE_010627;GENE_003486;GENE_007397;GENE_003416;GENE_020593;GENE_003942;GENE_008726;GENE_003968;GENE_014499;GENE_023616;GENE_014530;GENE_025184;GENE_015663;GENE_006525;GENE_013942;GENE_025384;GENE_018626;GENE_003406;GENE_012423
GO:0000166	nucleotide binding	molecular_function	627	627/ 3414	GENE_003647;GENE_024658;GENE_024225;GENE_012562;GENE_001388;GENE_012481;GENE_021012;GENE_010968;GENE_006673;GENE_015294;GENE_016918;GENE_011369;GENE_018306;GENE_016039;GENE_013673;GENE_013363;GENE_015466;GENE_001317;GENE_014969;GENE_025401;GENE_003180;GENE_008169;GENE_020339;GENE_002958;GENE_017322;GENE_017323;GENE_002323;GENE_017081;GENE_022500;GENE_016147;GENE_017087;GENE_014365;GENE_002459;GEN…
GO:0030247	polysaccharide binding	molecular_function	44	44/ 3414	GENE_003647;GENE_023328;GENE_005168;GENE_003745;GENE_000268;GENE_007855;GENE_025198;GENE_014939;GENE_019318;GENE_021266;GENE_017371;GENE_004172;GENE_004702;GENE_003284;GENE_003285;GENE_018207;GENE_025148;GENE_021338;GENE_018306;GENE_005664;GENE_018208;GENE_004835;GENE_010674;GENE_018211;GENE_000231;GENE_018852;GENE_010285;GENE_019289;GENE_021640;GENE_015407;GENE_000013;GENE_019303;GENE_000237;GEN…
GO:0048039	ubiquinone binding	molecular_function	1	1/ 3414	GENE_002442
GO:0010427	abscisic acid binding	molecular_function	9	9/ 3414	GENE_002678;GENE_002744;GENE_002671;GENE_002746;GENE_002666;GENE_002696;GENE_012358;GENE_006169;GENE_007987
GO:0043021	ribonucleoprotein complex binding	molecular_function	1	1/ 3414	GENE_012171
GO:0031683	G-protein beta/gamma-subunit complex binding	molecular_function	2	2/ 3414	GENE_019704;GENE_024098
GO:0003682	chromatin binding	molecular_function	7	7/ 3414	GENE_000538;GENE_017919;GENE_011482;GENE_023874;GENE_012826;GENE_020534;GENE_022543
GO:0051015	actin filament binding	molecular_function	7	7/ 3414	GENE_013710;GENE_006673;GENE_022369;GENE_020742;GENE_024027;GENE_005442;GENE_012386
GO:0010997	anaphase-promoting complex binding	molecular_function	3	3/ 3414	GENE_020656;GENE_001012;GENE_001427
GO:0051536	iron-sulfur cluster binding	molecular_function	10	10/ 3414	GENE_008001;GENE_026255;GENE_018036;GENE_009271;GENE_026291;GENE_001940;GENE_001743;GENE_005362;GENE_003349;GENE_021331
GO:0031210	phosphatidylcholine binding	molecular_function	1	1/ 3414	GENE_013225
GO:0051740	ethylene binding	molecular_function	1	1/ 3414	GENE_016920
GO:0004888	transmembrane signaling receptor activity	molecular_function	20	20/ 3414	GENE_001374;GENE_023314;GENE_006848;GENE_011533;GENE_012562;GENE_020311;GENE_011666;GENE_019584;GENE_000459;GENE_024114;GENE_023277;GENE_006596;GENE_023125;GENE_009995;GENE_024522;GENE_018779;GENE_018853;GENE_020314;GENE_011371;GENE_018819
GO:0038199	ethylene receptor activity	molecular_function	1	1/ 3414	GENE_016920
GO:0009881	photoreceptor activity	molecular_function	1	1/ 3414	GENE_008992
GO:0016875	ligase activity, forming carbon-oxygen bonds	molecular_function	2	2/ 3414	GENE_002594;GENE_010358
GO:0016877	ligase activity, forming carbon-sulfur bonds	molecular_function	7	7/ 3414	GENE_022473;GENE_001770;GENE_010718;GENE_000217;GENE_001175;GENE_000432;GENE_024066
GO:0016879	ligase activity, forming carbon-nitrogen bonds	molecular_function	10	10/ 3414	GENE_004251;GENE_010590;GENE_012452;GENE_002991;GENE_006923;GENE_003031;GENE_022644;GENE_022292;GENE_015647;GENE_003180
GO:0046933	proton-transporting ATP synthase activity, rotational mechanism	molecular_function	5	5/ 3414	GENE_015341;GENE_000003;GENE_008409;GENE_010161;GENE_008404
GO:0016846	carbon-sulfur lyase activity	molecular_function	6	6/ 3414	GENE_019622;GENE_014499;GENE_005509;GENE_006525;GENE_007811;GENE_015698
GO:0016840	carbon-nitrogen lyase activity	molecular_function	7	7/ 3414	GENE_025865;GENE_016727;GENE_006933;GENE_002330;GENE_004909;GENE_015663;GENE_002273
GO:0016849	phosphorus-oxygen lyase activity	molecular_function	2	2/ 3414	GENE_011966;GENE_012361
GO:0016835	carbon-oxygen lyase activity	molecular_function	26	26/ 3414	GENE_005531;GENE_005362;GENE_018626;GENE_006541;GENE_022201;GENE_026245;GENE_004663;GENE_019885;GENE_016743;GENE_004918;GENE_009603;GENE_009606;GENE_017608;GENE_005177;GENE_008312;GENE_017533;GENE_009378;GENE_000544;GENE_016717;GENE_017640;GENE_007664;GENE_007689;GENE_006768;GENE_007533;GENE_005636;GENE_010565
GO:0016830	carbon-carbon lyase activity	molecular_function	13	13/ 3414	GENE_019456;GENE_007397;GENE_019567;GENE_018874;GENE_003968;GENE_009115;GENE_003349;GENE_020189;GENE_011896;GENE_013985;GENE_025384;GENE_018323;GENE_022330
GO:0061733	peptide-lysine-N-acetyltransferase activity	molecular_function	1	1/ 3414	GENE_024206
GO:0015035	protein-disulfide reductase activity	molecular_function	2	2/ 3414	GENE_017841;GENE_021437
GO:0008276	protein methyltransferase activity	molecular_function	2	2/ 3414	GENE_001518;GENE_020986
GO:0004721	phosphoprotein phosphatase activity	molecular_function	21	21/ 3414	GENE_019159;GENE_012998;GENE_011975;GENE_011732;GENE_009855;GENE_013710;GENE_013551;GENE_000219;GENE_007870;GENE_023325;GENE_026313;GENE_003315;GENE_022397;GENE_004700;GENE_018724;GENE_010349;GENE_007999;GENE_007707;GENE_004801;GENE_013657;GENE_024908
GO:0019707	protein-cysteine S-acyltransferase activity	molecular_function	3	3/ 3414	GENE_011797;GENE_001310;GENE_013532
GO:0019787	ubiquitin-like protein transferase activity	molecular_function	51	51/ 3414	GENE_023418;GENE_022033;GENE_000608;GENE_002104;GENE_025477;GENE_021736;GENE_019432;GENE_001490;GENE_025413;GENE_004130;GENE_009129;GENE_006562;GENE_019664;GENE_020461;GENE_003802;GENE_021795;GENE_001169;GENE_003920;GENE_015148;GENE_000204;GENE_015807;GENE_016159;GENE_013753;GENE_012907;GENE_020163;GENE_013757;GENE_014890;GENE_013564;GENE_019498;GENE_012194;GENE_011135;GENE_011602;GENE_015465;GEN…
GO:0140103	catalytic activity, acting on a glycoprotein	molecular_function	3	3/ 3414	GENE_022797;GENE_002623;GENE_013585
GO:0033558	protein lysine deacetylase activity	molecular_function	1	1/ 3414	GENE_019627
GO:0004672	protein kinase activity	molecular_function	311	311/ 3414	GENE_003647;GENE_000183;GENE_011007;GENE_019849;GENE_005910;GENE_005168;GENE_001388;GENE_023125;GENE_003280;GENE_017522;GENE_021580;GENE_017521;GENE_006322;GENE_025412;GENE_000002;GENE_011870;GENE_003432;GENE_020612;GENE_021012;GENE_004159;GENE_010968;GENE_006705;GENE_011970;GENE_022368;GENE_022033;GENE_008306;GENE_015023;GENE_015294;GENE_004172;GENE_022933;GENE_004608;GENE_016918;GENE_011369;GEN…
GO:0140994	RNA polymerase II CTD heptapeptide repeat modifying activity	molecular_function	2	2/ 3414	GENE_013657;GENE_001712
GO:0140993	histone modifying activity	molecular_function	6	6/ 3414	GENE_024206;GENE_020986;GENE_006152;GENE_019627;GENE_006585;GENE_000556
GO:0008233	peptidase activity	molecular_function	69	69/ 3414	GENE_011693;GENE_021520;GENE_003504;GENE_002634;GENE_013290;GENE_020690;GENE_020973;GENE_018932;GENE_010764;GENE_006420;GENE_016095;GENE_014817;GENE_002473;GENE_001518;GENE_012028;GENE_024840;GENE_006779;GENE_004014;GENE_009329;GENE_016135;GENE_021275;GENE_022468;GENE_008497;GENE_013671;GENE_008978;GENE_002930;GENE_000975;GENE_001781;GENE_018660;GENE_000635;GENE_024275;GENE_015547;GENE_002397;GEN…
GO:0003755	peptidyl-prolyl cis-trans isomerase activity	molecular_function	3	3/ 3414	GENE_008164;GENE_000660;GENE_016202
GO:0016603	glutaminyl-peptide cyclotransferase activity	molecular_function	1	1/ 3414	GENE_009639
GO:0140457	protein demethylase activity	molecular_function	1	1/ 3414	GENE_006152
GO:0008641	ubiquitin-like modifier activating enzyme activity	molecular_function	1	1/ 3414	GENE_000217
GO:0016798	hydrolase activity, acting on glycosyl bonds	molecular_function	93	93/ 3414	GENE_024410;GENE_018821;GENE_018829;GENE_009717;GENE_001733;GENE_013416;GENE_024257;GENE_009646;GENE_012209;GENE_015864;GENE_025061;GENE_024093;GENE_002604;GENE_005157;GENE_011845;GENE_025241;GENE_025958;GENE_011090;GENE_025089;GENE_006933;GENE_009674;GENE_018155;GENE_005925;GENE_002993;GENE_023300;GENE_010640;GENE_012185;GENE_020280;GENE_001718;GENE_006652;GENE_009661;GENE_000978;GENE_011157;GEN…
GO:0016810	hydrolase activity, acting on carbon-nitrogen (but not peptide) bonds	molecular_function	8	8/ 3414	GENE_011726;GENE_011896;GENE_002502;GENE_019627;GENE_004171;GENE_018874;GENE_007617;GENE_021801
GO:0016817	hydrolase activity, acting on acid anhydrides	molecular_function	122	122/ 3414	GENE_020696;GENE_015197;GENE_018438;GENE_024904;GENE_024700;GENE_019417;GENE_018435;GENE_017847;GENE_014915;GENE_017406;GENE_002968;GENE_000322;GENE_024098;GENE_017339;GENE_025064;GENE_011308;GENE_005159;GENE_002111;GENE_012172;GENE_002114;GENE_015466;GENE_019916;GENE_001317;GENE_003832;GENE_020531;GENE_001893;GENE_001541;GENE_001896;GENE_000311;GENE_002958;GENE_016431;GENE_017323;GENE_008076;GEN…
GO:0017171	serine hydrolase activity	molecular_function	30	30/ 3414	GENE_002634;GENE_020973;GENE_012028;GENE_014817;GENE_024840;GENE_004014;GENE_022468;GENE_014941;GENE_013671;GENE_024275;GENE_000975;GENE_000635;GENE_015547;GENE_002506;GENE_002397;GENE_020801;GENE_024750;GENE_025957;GENE_012035;GENE_024875;GENE_012172;GENE_020572;GENE_017345;GENE_006151;GENE_025794;GENE_017203;GENE_009814;GENE_009914;GENE_016028;GENE_017598
GO:0016788	hydrolase activity, acting on ester bonds	molecular_function	176	176/ 3414	GENE_009899;GENE_020698;GENE_007870;GENE_023325;GENE_005142;GENE_019840;GENE_007707;GENE_025707;GENE_000415;GENE_012361;GENE_024908;GENE_019159;GENE_016332;GENE_024929;GENE_010576;GENE_007569;GENE_010477;GENE_015423;GENE_015341;GENE_021310;GENE_013657;GENE_002636;GENE_020386;GENE_010496;GENE_011014;GENE_020864;GENE_011966;GENE_012171;GENE_013875;GENE_024135;GENE_022462;GENE_024876;GENE_006108;GEN…
GO:0019213	deacetylase activity	molecular_function	1	1/ 3414	GENE_019627
GO:0016614	oxidoreductase activity, acting on CH-OH group of donors	molecular_function	45	45/ 3414	GENE_020738;GENE_021487;GENE_001347;GENE_018113;GENE_000517;GENE_020289;GENE_025259;GENE_023251;GENE_017870;GENE_012120;GENE_022201;GENE_004681;GENE_021499;GENE_010418;GENE_020584;GENE_024240;GENE_006544;GENE_021310;GENE_017820;GENE_007689;GENE_006524;GENE_017807;GENE_024293;GENE_009984;GENE_016220;GENE_025443;GENE_022216;GENE_001461;GENE_021369;GENE_007664;GENE_009696;GENE_016668;GENE_004220;GEN…
GO:0016903	oxidoreductase activity, acting on the aldehyde or oxo group of donors	molecular_function	12	12/ 3414	GENE_011116;GENE_000926;GENE_009696;GENE_011664;GENE_003881;GENE_025693;GENE_024745;GENE_002618;GENE_017820;GENE_018094;GENE_018948;GENE_008325
GO:0016675	oxidoreductase activity, acting on a heme group of donors	molecular_function	1	1/ 3414	GENE_015034
GO:0016679	oxidoreductase activity, acting on diphenols and related substances as donors	molecular_function	10	10/ 3414	GENE_015266;GENE_024351;GENE_005841;GENE_023818;GENE_023804;GENE_005821;GENE_019381;GENE_008560;GENE_003945;GENE_003947
GO:0016645	oxidoreductase activity, acting on the CH-NH group of donors	molecular_function	8	8/ 3414	GENE_004105;GENE_006862;GENE_022698;GENE_025520;GENE_025829;GENE_017863;GENE_025639;GENE_020439
GO:0051213	dioxygenase activity	molecular_function	22	22/ 3414	GENE_010861;GENE_010003;GENE_010908;GENE_022521;GENE_014810;GENE_018478;GENE_005088;GENE_005898;GENE_017769;GENE_008650;GENE_005916;GENE_015703;GENE_000868;GENE_007184;GENE_002759;GENE_019651;GENE_020551;GENE_007474;GENE_019897;GENE_015875;GENE_016826;GENE_005597
GO:0016229	steroid dehydrogenase activity	molecular_function	3	3/ 3414	GENE_017971;GENE_008524;GENE_009696
GO:0010242	oxygen evolving activity	molecular_function	1	1/ 3414	GENE_008371
GO:0009055	electron transfer activity	molecular_function	16	16/ 3414	GENE_010019;GENE_002465;GENE_015056;GENE_022353;GENE_010012;GENE_010194;GENE_001940;GENE_015034;GENE_008371;GENE_004528;GENE_017073;GENE_010112;GENE_001743;GENE_010152;GENE_019534;GENE_009397
GO:0016705	oxidoreductase activity, acting on paired donors, with incorporation or reduction of molecular oxygen	molecular_function	93	93/ 3414	GENE_024222;GENE_004946;GENE_015612;GENE_021586;GENE_007968;GENE_021014;GENE_021507;GENE_001738;GENE_003809;GENE_022609;GENE_021097;GENE_007864;GENE_015069;GENE_026135;GENE_017419;GENE_001315;GENE_015509;GENE_002759;GENE_002813;GENE_009562;GENE_009271;GENE_009569;GENE_007474;GENE_009400;GENE_019145;GENE_009404;GENE_010278;GENE_020077;GENE_022946;GENE_010861;GENE_022090;GENE_002821;GENE_002822;GEN…
GO:0016701	oxidoreductase activity, acting on single donors with incorporation of molecular oxygen	molecular_function	14	14/ 3414	GENE_020551;GENE_018478;GENE_025526;GENE_025697;GENE_000868;GENE_005898;GENE_019897;GENE_017769;GENE_007184;GENE_018793;GENE_020322;GENE_005088;GENE_005916;GENE_019651
GO:0140575	transmembrane monodehydroascorbate reductase activity	molecular_function	1	1/ 3414	GENE_015535
GO:0016627	oxidoreductase activity, acting on the CH-CH group of donors	molecular_function	16	16/ 3414	GENE_014365;GENE_022534;GENE_012237;GENE_010223;GENE_004791;GENE_018745;GENE_024850;GENE_007101;GENE_007038;GENE_012238;GENE_016644;GENE_008524;GENE_010115;GENE_020514;GENE_013222;GENE_006017
GO:0045550	geranylgeranyl reductase activity	molecular_function	1	1/ 3414	GENE_010223
GO:0016651	oxidoreductase activity, acting on NAD(P)H	molecular_function	8	8/ 3414	GENE_018577;GENE_014856;GENE_015056;GENE_004249;GENE_005049;GENE_000589;GENE_019381;GENE_017623
GO:0016684	oxidoreductase activity, acting on peroxide as acceptor	molecular_function	24	24/ 3414	GENE_005049;GENE_001248;GENE_006612;GENE_018577;GENE_014856;GENE_005876;GENE_002194;GENE_023620;GENE_000524;GENE_003514;GENE_023720;GENE_010304;GENE_021935;GENE_023156;GENE_000868;GENE_011680;GENE_007184;GENE_018835;GENE_018478;GENE_019028;GENE_023619;GENE_005863;GENE_005868;GENE_023906
GO:0004497	monooxygenase activity	molecular_function	91	91/ 3414	GENE_015266;GENE_004946;GENE_024222;GENE_021586;GENE_003434;GENE_024225;GENE_021014;GENE_001738;GENE_003809;GENE_022609;GENE_021097;GENE_026135;GENE_017419;GENE_001315;GENE_015509;GENE_002813;GENE_009562;GENE_009271;GENE_009569;GENE_009400;GENE_019145;GENE_009404;GENE_010278;GENE_020077;GENE_022946;GENE_025526;GENE_022090;GENE_002821;GENE_002822;GENE_008278;GENE_020322;GENE_015676;GENE_012900;GEN…
GO:0016638	oxidoreductase activity, acting on the CH-NH2 group of donors	molecular_function	8	8/ 3414	GENE_001735;GENE_025106;GENE_019596;GENE_021331;GENE_009081;GENE_000595;GENE_022585;GENE_014495
GO:0016661	oxidoreductase activity, acting on other nitrogenous compounds as donors	molecular_function	1	1/ 3414	GENE_003619
GO:0016667	oxidoreductase activity, acting on a sulfur group of donors	molecular_function	8	8/ 3414	GENE_018036;GENE_015340;GENE_010461;GENE_010465;GENE_004301;GENE_004590;GENE_017841;GENE_021437
GO:0003796	lysozyme activity	molecular_function	2	2/ 3414	GENE_009674;GENE_009661
GO:0016872	intramolecular lyase activity	molecular_function	2	2/ 3414	GENE_022845;GENE_003953
GO:0003916	DNA topoisomerase activity	molecular_function	1	1/ 3414	GENE_017973
GO:0016866	intramolecular transferase activity	molecular_function	5	5/ 3414	GENE_020829;GENE_011435;GENE_013001;GENE_021030;GENE_009506
GO:0016860	intramolecular oxidoreductase activity	molecular_function	5	5/ 3414	GENE_018626;GENE_020202;GENE_022201;GENE_025477;GENE_008312
GO:0016854	racemase and epimerase activity	molecular_function	10	10/ 3414	GENE_015468;GENE_025464;GENE_024521;GENE_014551;GENE_026018;GENE_008312;GENE_022520;GENE_008756;GENE_022201;GENE_013635
GO:0016859	cis-trans isomerase activity	molecular_function	3	3/ 3414	GENE_008164;GENE_000660;GENE_016202
GO:0140098	catalytic activity, acting on RNA	molecular_function	62	62/ 3414	GENE_004951;GENE_026190;GENE_011533;GENE_015341;GENE_002636;GENE_005142;GENE_001347;GENE_008372;GENE_008790;GENE_002377;GENE_000486;GENE_012361;GENE_017682;GENE_019299;GENE_002498;GENE_008192;GENE_009421;GENE_010418;GENE_002594;GENE_002984;GENE_008715;GENE_010244;GENE_007569;GENE_004666;GENE_009921;GENE_012924;GENE_010477;GENE_017073;GENE_008758;GENE_011451;GENE_021310;GENE_013435;GENE_006108;GEN…
GO:0140097	catalytic activity, acting on DNA	molecular_function	40	40/ 3414	GENE_003074;GENE_001977;GENE_026080;GENE_001738;GENE_018864;GENE_022091;GENE_008393;GENE_021774;GENE_015367;GENE_017549;GENE_018532;GENE_023654;GENE_008715;GENE_004666;GENE_011623;GENE_021219;GENE_025004;GENE_015864;GENE_006108;GENE_016193;GENE_013430;GENE_003504;GENE_025043;GENE_002236;GENE_025464;GENE_010308;GENE_012703;GENE_003349;GENE_018932;GENE_007976;GENE_004938;GENE_019733;GENE_015423;GEN…
GO:0004386	helicase activity	molecular_function	13	13/ 3414	GENE_018750;GENE_022091;GENE_010321;GENE_001977;GENE_017549;GENE_018864;GENE_010308;GENE_021364;GENE_004776;GENE_000486;GENE_013435;GENE_025004;GENE_001460
GO:0016765	transferase activity, transferring alkyl or aryl (other than methyl) groups	molecular_function	31	31/ 3414	GENE_015267;GENE_010867;GENE_022807;GENE_010461;GENE_015303;GENE_016491;GENE_022482;GENE_018570;GENE_001472;GENE_002862;GENE_008632;GENE_026325;GENE_022172;GENE_004700;GENE_024255;GENE_015333;GENE_008158;GENE_010499;GENE_008526;GENE_001146;GENE_001253;GENE_005564;GENE_006982;GENE_000338;GENE_008623;GENE_007685;GENE_025693;GENE_010465;GENE_008583;GENE_015288;GENE_013007
GO:0016769	transferase activity, transferring nitrogenous groups	molecular_function	16	16/ 3414	GENE_003486;GENE_019622;GENE_020593;GENE_015698;GENE_003416;GENE_012423;GENE_008726;GENE_014530;GENE_003406;GENE_025184;GENE_006525;GENE_007811;GENE_003942;GENE_016840;GENE_012286;GENE_022873
GO:0016782	transferase activity, transferring sulphur-containing groups	molecular_function	7	7/ 3414	GENE_022254;GENE_018919;GENE_019036;GENE_022127;GENE_018626;GENE_022521;GENE_025248
GO:0016757	glycosyltransferase activity	molecular_function	99	99/ 3414	GENE_015618;GENE_025665;GENE_019929;GENE_022039;GENE_020148;GENE_009166;GENE_018141;GENE_005642;GENE_007868;GENE_010718;GENE_006292;GENE_008561;GENE_001256;GENE_022352;GENE_019755;GENE_018153;GENE_010374;GENE_012400;GENE_006113;GENE_002329;GENE_013215;GENE_010640;GENE_005676;GENE_008537;GENE_009582;GENE_014282;GENE_006504;GENE_023028;GENE_000265;GENE_000479;GENE_009477;GENE_020045;GENE_008610;GEN…
GO:0016744	transketolase or transaldolase activity	molecular_function	5	5/ 3414	GENE_022228;GENE_001556;GENE_013700;GENE_006654;GENE_023616
GO:0016772	transferase activity, transferring phosphorus-containing groups	molecular_function	407	407/ 3414	GENE_003647;GENE_012562;GENE_001388;GENE_021012;GENE_010968;GENE_008306;GENE_015294;GENE_016918;GENE_011369;GENE_018306;GENE_008974;GENE_013363;GENE_024133;GENE_007976;GENE_025401;GENE_008169;GENE_017322;GENE_002323;GENE_016147;GENE_017087;GENE_002459;GENE_024720;GENE_023795;GENE_009262;GENE_005802;GENE_006585;GENE_004172;GENE_010268;GENE_021338;GENE_011524;GENE_018871;GENE_002178;GENE_019289;GEN…
GO:0016741	transferase activity, transferring one-carbon groups	molecular_function	45	45/ 3414	GENE_022807;GENE_026190;GENE_003889;GENE_020957;GENE_011576;GENE_024994;GENE_004492;GENE_001743;GENE_023574;GENE_011083;GENE_001518;GENE_004700;GENE_022172;GENE_013228;GENE_013007;GENE_022468;GENE_007867;GENE_021310;GENE_011235;GENE_003382;GENE_013326;GENE_011278;GENE_003755;GENE_020901;GENE_015371;GENE_026098;GENE_004496;GENE_014675;GENE_003227;GENE_012136;GENE_000017;GENE_013374;GENE_006572;GEN…
GO:0016746	acyltransferase activity	molecular_function	104	104/ 3414	GENE_011797;GENE_002204;GENE_023735;GENE_023739;GENE_011884;GENE_005414;GENE_024709;GENE_025413;GENE_005552;GENE_003802;GENE_003920;GENE_021795;GENE_019498;GENE_019858;GENE_015465;GENE_005400;GENE_001310;GENE_000653;GENE_022082;GENE_014612;GENE_013078;GENE_021451;GENE_009814;GENE_000494;GENE_012085;GENE_005675;GENE_023418;GENE_012180;GENE_001790;GENE_002104;GENE_021736;GENE_019432;GENE_001490;GEN…

## Sheet: Supplementary table S3 GO
Supplementary table S3: Gene Ontology enrichment of the identified DEGs.
1. DA P.m 1DPI vs DA CK 1DPI
Number	GO ID	Term Type	Description	Ratio_in_study	Ratio_in_pop	Rich factor	Pvalue	Padjust	Gene_ids
48	GO:0005576	CC	extracellular region	48/ 952	511/ 22477	0.0939335	2.91e-07	0.000115888	GENE_000267;GENE_001287;GENE_001714;GENE_002119;GENE_002174;GENE_002194;GENE_003947;GENE_004129;GENE_005021;GENE_005876;GENE_005907;GENE_006075;GENE_006836;GENE_007708;GENE_007898;GENE_007927;GENE_008002;GENE_008084;GENE_008560;GENE_008630;GENE_009422;GENE_009661;GENE_010811;GENE_012111;GENE_012209;GENE_012256;GENE_013346;GENE_013427;GENE_013534;GENE_013671;GENE_014190;GENE_014898;GENE_014901;GEN…
121	GO:0016491	MF	oxidoreductase activity	121/ 952	1813/ 22477	0.0667402	5.18e-07	0.000313375	GENE_000263;GENE_000267;GENE_000656;GENE_000849;GENE_000868;GENE_001136;GENE_001277;GENE_001609;GENE_002069;GENE_002119;GENE_002174;GENE_002194;GENE_002427;GENE_002448;GENE_002465;GENE_002577;GENE_002612;GENE_003434;GENE_003710;GENE_003809;GENE_003873;GENE_003947;GENE_004156;GENE_004681;GENE_005863;GENE_005876;GENE_005883;GENE_006477;GENE_006544;GENE_006836;GENE_006862;GENE_006907;GENE_007022;GEN…
10	GO:0016998	BP	cell wall macromolecule catabolic process	10/ 952	36/ 22477	0.277778	1.65e-06	0.000403421	GENE_001071;GENE_012111;GENE_012209;GENE_018821;GENE_018829;GENE_024257;GENE_025165;GENE_025204;GENE_025241;GENE_025288
35	GO:0009755	BP	hormone-mediated signaling pathway	35/ 952	344/ 22477	0.101744	1.98e-06	0.000454486	GENE_000588;GENE_000816;GENE_001329;GENE_001467;GENE_001714;GENE_002621;GENE_002671;GENE_002678;GENE_002720;GENE_004199;GENE_006477;GENE_007132;GENE_008717;GENE_009058;GENE_009382;GENE_010843;GENE_010988;GENE_011125;GENE_011691;GENE_013334;GENE_013377;GENE_013744;GENE_015100;GENE_015529;GENE_016627;GENE_016846;GENE_016920;GENE_016949;GENE_020270;GENE_020903;GENE_023647;GENE_024262;GENE_024749;GEN…
74	GO:0005886	CC	plasma membrane	74/ 952	987/ 22477	0.0749747	2.14e-06	0.000568517	GENE_000084;GENE_001527;GENE_002136;GENE_002156;GENE_002203;GENE_002458;GENE_002467;GENE_003318;GENE_003745;GENE_004199;GENE_005183;GENE_005617;GENE_006477;GENE_006801;GENE_006857;GENE_007132;GENE_008015;GENE_008025;GENE_008119;GENE_008936;GENE_009552;GENE_009857;GENE_009995;GENE_010119;GENE_010418;GENE_010433;GENE_011757;GENE_011925;GENE_012225;GENE_012380;GENE_012384;GENE_012585;GENE_012605;GEN…
47	GO:0046906	MF	tetrapyrrole binding	47/ 952	519/ 22477	0.0905588	1.22e-06	0.000583759	GENE_000815;GENE_000849;GENE_000868;GENE_002069;GENE_002194;GENE_002280;GENE_002427;GENE_002577;GENE_002658;GENE_003809;GENE_005863;GENE_005876;GENE_006836;GENE_007708;GENE_007898;GENE_009074;GENE_009201;GENE_009371;GENE_009404;GENE_010406;GENE_010852;GENE_010884;GENE_012301;GENE_013346;GENE_013708;GENE_014848;GENE_015743;GENE_016232;GENE_017064;GENE_017199;GENE_017313;GENE_017419;GENE_017427;GEN…
16	GO:0044036	BP	cell wall macromolecule metabolic process	16/ 952	109/ 22477	0.146789	1.4e-05	0.00257014	GENE_001071;GENE_002276;GENE_012111;GENE_012209;GENE_013534;GENE_016163;GENE_017671;GENE_018821;GENE_018829;GENE_020050;GENE_022451;GENE_024257;GENE_025165;GENE_025204;GENE_025241;GENE_025288
48	GO:0022804	MF	active transmembrane transporter activity	48/ 952	581/ 22477	0.0826162	1.36e-05	0.00464183	GENE_000248;GENE_000311;GENE_000588;GENE_000816;GENE_000912;GENE_001084;GENE_001467;GENE_001615;GENE_001828;GENE_001973;GENE_002189;GENE_002884;GENE_003174;GENE_003832;GENE_004821;GENE_005141;GENE_005159;GENE_005226;GENE_007104;GENE_008629;GENE_009848;GENE_010869;GENE_011125;GENE_011744;GENE_012293;GENE_013334;GENE_015056;GENE_016949;GENE_016966;GENE_017323;GENE_017389;GENE_017406;GENE_017735;GEN…
10	GO:0009873	BP	ethylene-activated signaling pathway	10/ 952	49/ 22477	0.204082	3.23e-05	0.00539414	GENE_009058;GENE_009382;GENE_010843;GENE_010988;GENE_011691;GENE_013744;GENE_016627;GENE_016846;GENE_016920;GENE_023647
62	GO:0003700	MF	DNA-binding transcription factor activity	62/ 952	835/ 22477	0.0742515	2.15e-05	0.00642502	GENE_000222;GENE_000566;GENE_000960;GENE_001165;GENE_001307;GENE_001579;GENE_001633;GENE_002701;GENE_003563;GENE_003984;GENE_005437;GENE_006621;GENE_006890;GENE_007000;GENE_007399;GENE_007423;GENE_008028;GENE_009058;GENE_009325;GENE_009382;GENE_010383;GENE_010490;GENE_010708;GENE_010751;GENE_010843;GENE_010988;GENE_011468;GENE_011691;GENE_011936;GENE_012459;GENE_012968;GENE_013099;GENE_013280;GEN…
5	GO:0010112	BP	regulation of systemic acquired resistance	5/ 952	11/ 22477	0.454545	5.03e-05	0.00738674	GENE_010713;GENE_011075;GENE_025282;GENE_025302;GENE_025354
41	GO:0020037	MF	heme binding	41/ 952	487/ 22477	0.0841889	3.15e-05	0.0083703	GENE_000849;GENE_000868;GENE_002069;GENE_002194;GENE_002280;GENE_002427;GENE_002577;GENE_002658;GENE_003809;GENE_005863;GENE_005876;GENE_006836;GENE_007708;GENE_007898;GENE_009074;GENE_009201;GENE_009404;GENE_010406;GENE_012301;GENE_013346;GENE_013708;GENE_014848;GENE_015743;GENE_016232;GENE_017199;GENE_017313;GENE_017419;GENE_017427;GENE_017432;GENE_017813;GENE_018835;GENE_019120;GENE_020056;GEN…
9	GO:0004568	MF	chitinase activity	9/ 952	43/ 22477	0.209302	6.5e-05	0.0119369	GENE_001071;GENE_009661;GENE_013427;GENE_018821;GENE_018829;GENE_024257;GENE_025165;GENE_025204;GENE_025241
95	GO:0004672	MF	protein kinase activity	95/ 952	1496/ 22477	0.0635027	8.13e-05	0.013532	GENE_000231;GENE_001494;GENE_001786;GENE_002458;GENE_002467;GENE_002595;GENE_003115;GENE_003280;GENE_003745;GENE_004172;GENE_004254;GENE_005183;GENE_005369;GENE_005463;GENE_005617;GENE_006477;GENE_006578;GENE_006705;GENE_006857;GENE_007015;GENE_007143;GENE_007376;GENE_007817;GENE_008015;GENE_008464;GENE_008936;GENE_009276;GENE_009528;GENE_009552;GENE_009585;GENE_009765;GENE_009854;GENE_009857;GEN…
15	GO:0016298	MF	lipase activity	15/ 952	113/ 22477	0.132743	8.5e-05	0.013532	GENE_002156;GENE_002410;GENE_002413;GENE_003528;GENE_006160;GENE_006742;GENE_008025;GENE_008119;GENE_009878;GENE_009899;GENE_009959;GENE_012933;GENE_019022;GENE_020386;GENE_020771
91	GO:0022857	MF	transmembrane transporter activity	91/ 952	1436/ 22477	0.0633705	0.000107295	0.0160205	GENE_000248;GENE_000311;GENE_000588;GENE_000816;GENE_000912;GENE_000962;GENE_001084;GENE_001467;GENE_001527;GENE_001615;GENE_001713;GENE_001828;GENE_001961;GENE_001973;GENE_002189;GENE_002884;GENE_003174;GENE_003248;GENE_003744;GENE_003832;GENE_004190;GENE_004237;GENE_004710;GENE_004821;GENE_004901;GENE_005141;GENE_005159;GENE_005226;GENE_007104;GENE_007132;GENE_007951;GENE_008206;GENE_008390;GEN…
8	GO:0031347	BP	regulation of defense response	8/ 952	37/ 22477	0.216216	0.000129864	0.0170168	GENE_009661;GENE_010713;GENE_011075;GENE_013815;GENE_025282;GENE_025302;GENE_025354;GENE_025552
13	GO:0071949	MF	FAD binding	13/ 952	92/ 22477	0.141304	0.000130795	0.0174429	GENE_001136;GENE_003434;GENE_014168;GENE_016250;GENE_016296;GENE_016323;GENE_017917;GENE_024470;GENE_024620;GENE_024639;GENE_024658;GENE_024924;GENE_025639
36	GO:0004497	MF	monooxygenase activity	36/ 952	428/ 22477	0.0841121	0.000131424	0.0174429	GENE_000849;GENE_002069;GENE_002427;GENE_002577;GENE_003434;GENE_003809;GENE_009074;GENE_009201;GENE_009404;GENE_010406;GENE_012301;GENE_013708;GENE_014848;GENE_015266;GENE_015743;GENE_016232;GENE_016250;GENE_016296;GENE_016323;GENE_017199;GENE_017313;GENE_017419;GENE_017427;GENE_017432;GENE_017813;GENE_018793;GENE_019120;GENE_020056;GENE_020093;GENE_020793;GENE_022365;GENE_022789;GENE_022965;GEN…
8	GO:1901072	BP	glucosamine-containing compound catabolic process	8/ 952	38/ 22477	0.210526	0.000158439	0.0176155	GENE_001071;GENE_013427;GENE_018821;GENE_018829;GENE_024257;GENE_025165;GENE_025204;GENE_025241
8	GO:0006030	BP	chitin metabolic process	8/ 952	38/ 22477	0.210526	0.000158439	0.0176155	GENE_001071;GENE_013427;GENE_018821;GENE_018829;GENE_024257;GENE_025165;GENE_025204;GENE_025241
8	GO:0006026	BP	aminoglycan catabolic process	8/ 952	38/ 22477	0.210526	0.000158439	0.0176155	GENE_001071;GENE_013427;GENE_018821;GENE_018829;GENE_024257;GENE_025165;GENE_025204;GENE_025241
8	GO:0006032	BP	chitin catabolic process	8/ 952	38/ 22477	0.210526	0.000158439	0.0176155	GENE_001071;GENE_013427;GENE_018821;GENE_018829;GENE_024257;GENE_025165;GENE_025204;GENE_025241
8	GO:0046348	BP	amino sugar catabolic process	8/ 952	38/ 22477	0.210526	0.000158439	0.0176155	GENE_001071;GENE_013427;GENE_018821;GENE_018829;GENE_024257;GENE_025165;GENE_025204;GENE_025241
28	GO:0015291	MF	secondary active transmembrane transporter activity	28/ 952	310/ 22477	0.0903226	0.000166308	0.020911	GENE_000248;GENE_000588;GENE_000816;GENE_000912;GENE_001467;GENE_001828;GENE_004821;GENE_007104;GENE_008629;GENE_009848;GENE_011125;GENE_011744;GENE_012293;GENE_013334;GENE_016949;GENE_016966;GENE_017991;GENE_019900;GENE_022353;GENE_022471;GENE_022564;GENE_022611;GENE_023481;GENE_023988;GENE_024224;GENE_024262;GENE_024896;GENE_026220
6	GO:0080044	MF	quercetin 7-O-glucosyltransferase activity	6/ 952	22/ 22477	0.272727	0.000236461	0.0269003	GENE_001256;GENE_001686;GENE_003852;GENE_012421;GENE_017663;GENE_017666
6	GO:0080043	MF	quercetin 3-O-glucosyltransferase activity	6/ 952	22/ 22477	0.272727	0.000236461	0.0269003	GENE_001256;GENE_001686;GENE_003852;GENE_012421;GENE_017663;GENE_017666
8	GO:1901071	BP	glucosamine-containing compound metabolic process	8/ 952	41/ 22477	0.195122	0.00027665	0.0281952	GENE_001071;GENE_013427;GENE_018821;GENE_018829;GENE_024257;GENE_025165;GENE_025204;GENE_025241
64	GO:0140110	MF	transcription regulator activity	64/ 952	957/ 22477	0.0668757	0.000290319	0.031526	GENE_000222;GENE_000566;GENE_000960;GENE_001165;GENE_001307;GENE_001579;GENE_001633;GENE_002701;GENE_003563;GENE_003984;GENE_005437;GENE_006621;GENE_006890;GENE_007000;GENE_007399;GENE_007423;GENE_008028;GENE_009058;GENE_009325;GENE_009382;GENE_010383;GENE_010490;GENE_010708;GENE_010751;GENE_010843;GENE_010988;GENE_011468;GENE_011691;GENE_011936;GENE_012459;GENE_012968;GENE_013099;GENE_013280;GEN…
8	GO:0006022	BP	aminoglycan metabolic process	8/ 952	43/ 22477	0.186047	0.000389588	0.0376157	GENE_001071;GENE_013427;GENE_018821;GENE_018829;GENE_024257;GENE_025165;GENE_025204;GENE_025241
91	GO:0005215	MF	transporter activity	91/ 952	1486/ 22477	0.0612382	0.000390588	0.0405702	GENE_000248;GENE_000311;GENE_000588;GENE_000816;GENE_000912;GENE_000962;GENE_001084;GENE_001467;GENE_001527;GENE_001615;GENE_001713;GENE_001828;GENE_001961;GENE_001973;GENE_002189;GENE_002884;GENE_003174;GENE_003248;GENE_003744;GENE_003832;GENE_004190;GENE_004237;GENE_004710;GENE_004821;GENE_004901;GENE_005141;GENE_005159;GENE_005226;GENE_007104;GENE_007132;GENE_007951;GENE_008206;GENE_008390;GEN…
17	GO:0004857	MF	enzyme inhibitor activity	17/ 952	160/ 22477	0.10625	0.000460778	0.0427695	GENE_002621;GENE_002671;GENE_002678;GENE_002720;GENE_010433;GENE_013875;GENE_016032;GENE_016093;GENE_016568;GENE_017282;GENE_018766;GENE_019466;GENE_019910;GENE_020422;GENE_024829;GENE_024970;GENE_025022
35	GO:0004553	MF	hydrolase activity, hydrolyzing O-glycosyl compounds	35/ 952	444/ 22477	0.0788288	0.00046533	0.0427695	GENE_001071;GENE_001287;GENE_002737;GENE_005157;GENE_005612;GENE_005942;GENE_007817;GENE_009589;GENE_009661;GENE_011265;GENE_011475;GENE_011512;GENE_012111;GENE_012209;GENE_012417;GENE_013427;GENE_013534;GENE_013918;GENE_014190;GENE_016163;GENE_017671;GENE_017989;GENE_018105;GENE_018155;GENE_018821;GENE_018829;GENE_020170;GENE_022134;GENE_024257;GENE_025165;GENE_025204;GENE_025241;GENE_025288;GEN…
33	GO:0030246	MF	carbohydrate binding	33/ 952	412/ 22477	0.0800971	0.00046547	0.0427695	GENE_000231;GENE_002856;GENE_003745;GENE_004172;GENE_005617;GENE_008883;GENE_008936;GENE_009857;GENE_009995;GENE_010674;GENE_010771;GENE_016710;GENE_017073;GENE_018779;GENE_018852;GENE_018871;GENE_018947;GENE_018953;GENE_019214;GENE_019226;GENE_019282;GENE_019318;GENE_020046;GENE_020092;GENE_020129;GENE_020160;GENE_020311;GENE_020411;GENE_021580;GENE_023125;GENE_023314;GENE_025148;GENE_025401
6	GO:0004675	MF	transmembrane receptor protein serine/threonine kinase activity	6/ 952	25/ 22477	0.24	0.000503423	0.0439411	GENE_009857;GENE_009995;GENE_018779;GENE_020311;GENE_023125;GENE_023314
17	GO:0140678	MF	molecular function inhibitor activity	17/ 952	162/ 22477	0.104938	0.000532034	0.0439411	GENE_002621;GENE_002671;GENE_002678;GENE_002720;GENE_010433;GENE_013875;GENE_016032;GENE_016093;GENE_016568;GENE_017282;GENE_018766;GENE_019466;GENE_019910;GENE_020422;GENE_024829;GENE_024970;GENE_025022
9	GO:0042973	MF	glucan endo-1,3-beta-D-glucosidase activity	9/ 952	56/ 22477	0.160714	0.000533399	0.0439411	GENE_002737;GENE_005157;GENE_005612;GENE_007817;GENE_011265;GENE_011512;GENE_017989;GENE_018105;GENE_018155
7	GO:0004866	MF	endopeptidase inhibitor activity	7/ 952	36/ 22477	0.194444	0.000680029	0.0524061	GENE_016032;GENE_016093;GENE_016568;GENE_017282;GENE_019466;GENE_019910;GENE_020422
7	GO:0030414	MF	peptidase inhibitor activity	7/ 952	36/ 22477	0.194444	0.000680029	0.0524061	GENE_016032;GENE_016093;GENE_016568;GENE_017282;GENE_019466;GENE_019910;GENE_020422
8	GO:0016682	MF	oxidoreductase activity, acting on diphenols and related substances as donors, oxygen as acceptor	8/ 952	47/ 22477	0.170213	0.000727606	0.0526742	GENE_000267;GENE_002119;GENE_002174;GENE_003947;GENE_007927;GENE_008560;GENE_008630;GENE_015266
17	GO:0050660	MF	flavin adenine dinucleotide binding	17/ 952	167/ 22477	0.101796	0.000752876	0.0529006	GENE_001136;GENE_003434;GENE_006862;GENE_014168;GENE_016250;GENE_016296;GENE_016323;GENE_017917;GENE_022789;GENE_022965;GENE_024470;GENE_024620;GENE_024639;GENE_024658;GENE_024924;GENE_025021;GENE_025639
12	GO:0009653	BP	anatomical structure morphogenesis	12/ 952	94/ 22477	0.12766	0.000607712	0.0545835	GENE_004918;GENE_006075;GENE_008002;GENE_009422;GENE_012256;GENE_013079;GENE_014901;GENE_020687;GENE_023062;GENE_024458;GENE_024831;GENE_026075
9	GO:0042742	BP	defense response to bacterium	9/ 952	57/ 22477	0.157895	0.000609954	0.0545835	GENE_003180;GENE_005617;GENE_008835;GENE_009857;GENE_009995;GENE_018779;GENE_020311;GENE_023125;GENE_023314
6	GO:0002831	BP	regulation of response to biotic stimulus	6/ 952	26/ 22477	0.230769	0.00063119	0.055139	GENE_009661;GENE_010713;GENE_011075;GENE_025282;GENE_025302;GENE_025354
7	GO:0061135	MF	endopeptidase regulator activity	7/ 952	37/ 22477	0.189189	0.000808401	0.0551791	GENE_016032;GENE_016093;GENE_016568;GENE_017282;GENE_019466;GENE_019910;GENE_020422
7	GO:0002229	BP	defense response to oomycetes	7/ 952	36/ 22477	0.194444	0.000680029	0.0554492	GENE_005617;GENE_009857;GENE_009995;GENE_018779;GENE_020311;GENE_023125;GENE_023314
7	GO:0002239	BP	response to oomycetes	7/ 952	36/ 22477	0.194444	0.000680029	0.0554492	GENE_005617;GENE_009857;GENE_009995;GENE_018779;GENE_020311;GENE_023125;GENE_023314
9	GO:0006749	BP	glutathione metabolic process	9/ 952	58/ 22477	0.155172	0.000695263	0.0554547	GENE_001472;GENE_003031;GENE_003180;GENE_008583;GENE_008623;GENE_008632;GENE_009413;GENE_013986;GENE_015288
11	GO:0008061	MF	chitin binding	11/ 952	85/ 22477	0.129412	0.000902975	0.0599224	GENE_001071;GENE_008835;GENE_009557;GENE_012945;GENE_013427;GENE_018821;GENE_018829;GENE_024257;GENE_025165;GENE_025204;GENE_025241
6	GO:0032101	BP	regulation of response to external stimulus	6/ 952	27/ 22477	0.222222	0.000782712	0.0611015	GENE_009661;GENE_010713;GENE_011075;GENE_025282;GENE_025302;GENE_025354
7	GO:0061134	MF	peptidase regulator activity	7/ 952	39/ 22477	0.179487	0.00112211	0.0704209	GENE_016032;GENE_016093;GENE_016568;GENE_017282;GENE_019466;GENE_019910;GENE_020422
96	GO:0016773	MF	phosphotransferase activity, alcohol group as acceptor	96/ 952	1641/ 22477	0.0585009	0.00114961	0.0704209	GENE_000231;GENE_001494;GENE_001675;GENE_001786;GENE_002458;GENE_002467;GENE_002595;GENE_003115;GENE_003280;GENE_003745;GENE_004172;GENE_004254;GENE_005183;GENE_005369;GENE_005463;GENE_005617;GENE_006477;GENE_006578;GENE_006705;GENE_006857;GENE_007015;GENE_007143;GENE_007376;GENE_007817;GENE_008015;GENE_008464;GENE_008936;GENE_009276;GENE_009528;GENE_009552;GENE_009585;GENE_009765;GENE_009854;GEN…
8	GO:0016679	MF	oxidoreductase activity, acting on diphenols and related substances as donors	8/ 952	51/ 22477	0.156863	0.00126938	0.0739643	GENE_000267;GENE_002119;GENE_002174;GENE_003947;GENE_007927;GENE_008560;GENE_008630;GENE_015266
8	GO:0006040	BP	amino sugar metabolic process	8/ 952	49/ 22477	0.163265	0.000968521	0.0740313	GENE_001071;GENE_013427;GENE_018821;GENE_018829;GENE_024257;GENE_025165;GENE_025204;GENE_025241
9	GO:0009617	BP	response to bacterium	9/ 952	61/ 22477	0.147541	0.00101122	0.0745138	GENE_003180;GENE_005617;GENE_008835;GENE_009857;GENE_009995;GENE_018779;GENE_020311;GENE_023125;GENE_023314
25	GO:0098542	BP	defense response to other organism	25/ 952	293/ 22477	0.0853242	0.00103576	0.0745138	GENE_002458;GENE_002467;GENE_003180;GENE_005617;GENE_006094;GENE_006857;GENE_008835;GENE_009857;GENE_009995;GENE_010371;GENE_012171;GENE_012300;GENE_017073;GENE_017900;GENE_018779;GENE_018821;GENE_018829;GENE_018947;GENE_020311;GENE_020414;GENE_020427;GENE_021488;GENE_023125;GENE_023314;GENE_024257
36	GO:0016798	MF	hydrolase activity, acting on glycosyl bonds	36/ 952	490/ 22477	0.0734694	0.00135935	0.0764405	GENE_001071;GENE_001287;GENE_002737;GENE_005157;GENE_005612;GENE_005942;GENE_007817;GENE_009589;GENE_009661;GENE_011265;GENE_011475;GENE_011512;GENE_012111;GENE_012209;GENE_012417;GENE_013427;GENE_013534;GENE_013918;GENE_014190;GENE_016163;GENE_017671;GENE_017989;GENE_018105;GENE_018155;GENE_018821;GENE_018829;GENE_018981;GENE_020170;GENE_022134;GENE_024257;GENE_025165;GENE_025204;GENE_025241;GEN…
3	GO:0019139	MF	cytokinin dehydrogenase activity	3/ 952	6/ 22477	0.5	0.00137586	0.0764405	GENE_001136;GENE_017917;GENE_025639
425	GO:0016020	CC	membrane	425/ 952	8878/ 22477	0.0478711	0.00100889	0.0804084	GENE_000084;GENE_000195;GENE_000231;GENE_000248;GENE_000267;GENE_000311;GENE_000489;GENE_000577;GENE_000588;GENE_000815;GENE_000816;GENE_000849;GENE_000868;GENE_000912;GENE_000962;GENE_001071;GENE_001277;GENE_001287;GENE_001317;GENE_001326;GENE_001329;GENE_001467;GENE_001527;GENE_001579;GENE_001615;GENE_001671;GENE_001713;GENE_001770;GENE_001828;GENE_001961;GENE_001973;GENE_002069;GENE_002119;GEN…
3	GO:0031221	BP	arabinan metabolic process	3/ 952	6/ 22477	0.5	0.00137586	0.0901437	GENE_012111;GENE_012209;GENE_025288
3	GO:0031222	BP	arabinan catabolic process	3/ 952	6/ 22477	0.5	0.00137586	0.0901437	GENE_012111;GENE_012209;GENE_025288
11	GO:0000160	BP	phosphorelay signal transduction system	11/ 952	90/ 22477	0.122222	0.0014545	0.0920094	GENE_009058;GENE_009382;GENE_010843;GENE_010988;GENE_011691;GENE_013744;GENE_015100;GENE_016627;GENE_016846;GENE_016920;GENE_023647
9	GO:0004364	MF	glutathione transferase activity	9/ 952	66/ 22477	0.136364	0.00178844	0.0949453	GENE_001472;GENE_008583;GENE_008623;GENE_008632;GENE_009413;GENE_010465;GENE_010499;GENE_013986;GENE_015288
511	GO:0003824	MF	catalytic activity	511/ 952	10954/ 22477	0.0466496	0.00184052	0.0949453	GENE_000017;GENE_000044;GENE_000080;GENE_000084;GENE_000195;GENE_000217;GENE_000231;GENE_000263;GENE_000267;GENE_000311;GENE_000373;GENE_000507;GENE_000544;GENE_000653;GENE_000656;GENE_000849;GENE_000868;GENE_000900;GENE_001035;GENE_001071;GENE_001106;GENE_001136;GENE_001256;GENE_001277;GENE_001287;GENE_001317;GENE_001472;GENE_001494;GENE_001609;GENE_001615;GENE_001675;GENE_001686;GENE_001708;GEN…
10	GO:0140825	MF	lactoperoxidase activity	10/ 952	81/ 22477	0.123457	0.0021837	0.102536	GENE_002194;GENE_005863;GENE_005876;GENE_006836;GENE_007708;GENE_007898;GENE_013346;GENE_018835;GENE_022443;GENE_022562
4	GO:0003968	MF	RNA-dependent RNA polymerase activity	4/ 952	14/ 22477	0.285714	0.00227667	0.104233	GENE_011247;GENE_011254;GENE_011261;GENE_011327
10	GO:0008422	MF	beta-glucosidase activity	10/ 952	82/ 22477	0.121951	0.00239467	0.104233	GENE_002737;GENE_005157;GENE_005612;GENE_007817;GENE_009661;GENE_011265;GENE_011512;GENE_017989;GENE_018105;GENE_018155
5	GO:0005200	MF	structural constituent of cytoskeleton	5/ 952	23/ 22477	0.217391	0.00239967	0.104233	GENE_001035;GENE_003829;GENE_012224;GENE_013345;GENE_025023
5	GO:0016645	MF	oxidoreductase activity, acting on the CH-NH group of donors	5/ 952	23/ 22477	0.217391	0.00239967	0.104233	GENE_001136;GENE_004156;GENE_006862;GENE_017917;GENE_025639
6	GO:0009522	CC	photosystem I	6/ 952	31/ 22477	0.193548	0.00168527	0.107664	GENE_000815;GENE_005336;GENE_009371;GENE_010852;GENE_010884;GENE_018796
5	GO:0009765	BP	photosynthesis, light harvesting	5/ 952	22/ 22477	0.227273	0.00194507	0.120957	GENE_000815;GENE_009371;GENE_010852;GENE_010884;GENE_018796
9	GO:1901136	BP	carbohydrate derivative catabolic process	9/ 952	67/ 22477	0.134328	0.00198984	0.121679	GENE_001071;GENE_010372;GENE_013427;GENE_018821;GENE_018829;GENE_024257;GENE_025165;GENE_025204;GENE_025241
64	GO:0007165	BP	signal transduction	64/ 952	1035/ 22477	0.0618357	0.00256182	0.150015	GENE_000588;GENE_000816;GENE_001329;GENE_001467;GENE_001708;GENE_001714;GENE_002111;GENE_002156;GENE_002621;GENE_002671;GENE_002678;GENE_002720;GENE_003115;GENE_003318;GENE_003745;GENE_004199;GENE_006477;GENE_007132;GENE_007305;GENE_008025;GENE_008119;GENE_008717;GENE_009058;GENE_009382;GENE_009661;GENE_010843;GENE_010966;GENE_010988;GENE_011125;GENE_011691;GENE_013183;GENE_013334;GENE_013377;GEN…
3	GO:0046556	MF	alpha-L-arabinofuranosidase activity	3/ 952	8/ 22477	0.375	0.00361407	0.151474	GENE_012111;GENE_012209;GENE_025288
64	GO:1901575	BP	organic substance catabolic process	64/ 952	1041/ 22477	0.0614793	0.00268447	0.151528	GENE_000267;GENE_000507;GENE_000544;GENE_001071;GENE_002119;GENE_002156;GENE_002174;GENE_002194;GENE_002410;GENE_002413;GENE_003528;GENE_003873;GENE_004156;GENE_004918;GENE_005559;GENE_005863;GENE_005876;GENE_006685;GENE_006742;GENE_006836;GENE_007022;GENE_007708;GENE_007898;GENE_007927;GENE_008025;GENE_008560;GENE_008630;GENE_009878;GENE_009899;GENE_009959;GENE_010042;GENE_010372;GENE_011475;GEN…
6	GO:0052716	MF	hydroquinone:oxygen oxidoreductase activity	6/ 952	36/ 22477	0.166667	0.00372527	0.153442	GENE_000267;GENE_002119;GENE_002174;GENE_007927;GENE_008560;GENE_008630
7	GO:0009808	BP	lignin metabolic process	7/ 952	47/ 22477	0.148936	0.00342303	0.184693	GENE_000267;GENE_002119;GENE_002174;GENE_006544;GENE_007927;GENE_008560;GENE_008630
15	GO:0009734	BP	auxin-activated signaling pathway	15/ 952	153/ 22477	0.0980392	0.00348225	0.185165	GENE_000588;GENE_000816;GENE_001329;GENE_001467;GENE_007132;GENE_008717;GENE_011125;GENE_013334;GENE_013377;GENE_016949;GENE_020270;GENE_020903;GENE_024262;GENE_024749;GENE_026220
15	GO:0016042	BP	lipid catabolic process	15/ 952	154/ 22477	0.0974026	0.00356999	0.187118	GENE_002156;GENE_002410;GENE_002413;GENE_003528;GENE_006742;GENE_007022;GENE_008025;GENE_009878;GENE_009899;GENE_009959;GENE_012933;GENE_015875;GENE_021693;GENE_021869;GENE_024717
6	GO:0046271	BP	phenylpropanoid catabolic process	6/ 952	36/ 22477	0.166667	0.00372527	0.189833	GENE_000267;GENE_002119;GENE_002174;GENE_007927;GENE_008560;GENE_008630
6	GO:0046274	BP	lignin catabolic process	6/ 952	36/ 22477	0.166667	0.00372527	0.189833	GENE_000267;GENE_002119;GENE_002174;GENE_007927;GENE_008560;GENE_008630
7	GO:0004620	MF	phospholipase activity	7/ 952	50/ 22477	0.14	0.0048731	0.192493	GENE_002156;GENE_002410;GENE_002413;GENE_003528;GENE_006160;GENE_008025;GENE_008119
6	GO:0033293	MF	monocarboxylic acid binding	6/ 952	38/ 22477	0.157895	0.00491507	0.192493	GENE_002621;GENE_002671;GENE_002678;GENE_002720;GENE_010371;GENE_020414
2	GO:0004794	MF	L-threonine ammonia-lyase activity	2/ 952	3/ 22477	0.666667	0.00522477	0.194294	GENE_006371;GENE_015663
3	GO:0009044	MF	xylan 1,4-beta-xylosidase activity	3/ 952	9/ 22477	0.333333	0.00525128	0.194294	GENE_012111;GENE_012209;GENE_025288
12	GO:0016684	MF	oxidoreductase activity, acting on peroxide as acceptor	12/ 952	121/ 22477	0.0991736	0.00528636	0.194294	GENE_000868;GENE_002194;GENE_005863;GENE_005876;GENE_006836;GENE_007708;GENE_007898;GENE_013346;GENE_018835;GENE_022443;GENE_022562;GENE_025660
12	GO:0004601	MF	peroxidase activity	12/ 952	121/ 22477	0.0991736	0.00528636	0.194294	GENE_000868;GENE_002194;GENE_005863;GENE_005876;GENE_006836;GENE_007708;GENE_007898;GENE_013346;GENE_018835;GENE_022443;GENE_022562;GENE_025660
14	GO:0016765	MF	transferase activity, transferring alkyl or aryl (other than methyl) groups	14/ 952	147/ 22477	0.0952381	0.00561167	0.203125	GENE_001472;GENE_006476;GENE_008583;GENE_008623;GENE_008632;GENE_009413;GENE_010465;GENE_010499;GENE_013013;GENE_013986;GENE_015288;GENE_022482;GENE_022807;GENE_023370
8	GO:0080134	BP	regulation of response to stress	8/ 952	61/ 22477	0.131148	0.00405114	0.203612	GENE_009661;GENE_010713;GENE_011075;GENE_013815;GENE_025282;GENE_025302;GENE_025354;GENE_025552
10	GO:0010817	BP	regulation of hormone levels	10/ 952	89/ 22477	0.11236	0.00437002	0.216671	GENE_001136;GENE_001329;GENE_007132;GENE_011726;GENE_013377;GENE_013809;GENE_017917;GENE_021565;GENE_024749;GENE_025639
99	GO:0016310	BP	phosphorylation	99/ 952	1768/ 22477	0.0559955	0.0045544	0.222801	GENE_000231;GENE_001494;GENE_001786;GENE_002458;GENE_002467;GENE_002595;GENE_003115;GENE_003153;GENE_003280;GENE_003745;GENE_004172;GENE_004254;GENE_004476;GENE_005183;GENE_005369;GENE_005463;GENE_005617;GENE_006477;GENE_006578;GENE_006705;GENE_006857;GENE_007015;GENE_007143;GENE_007376;GENE_008015;GENE_009396;GENE_009528;GENE_009552;GENE_009765;GENE_009854;GENE_009857;GENE_009995;GENE_010043;GEN…
12	GO:0009055	MF	electron transfer activity	12/ 952	124/ 22477	0.0967742	0.00641528	0.226143	GENE_001277;GENE_002448;GENE_002465;GENE_003710;GENE_010019;GENE_010112;GENE_010194;GENE_015056;GENE_017073;GENE_019011;GENE_022045;GENE_022353
10	GO:0015926	MF	glucosidase activity	10/ 952	94/ 22477	0.106383	0.0064369	0.226143	GENE_002737;GENE_005157;GENE_005612;GENE_007817;GENE_009661;GENE_011265;GENE_011512;GENE_017989;GENE_018105;GENE_018155
4	GO:0009685	BP	gibberellin metabolic process	4/ 952	17/ 22477	0.235294	0.00489163	0.227182	GENE_002577;GENE_009378;GENE_015875;GENE_024831
4	GO:0098661	BP	inorganic anion transmembrane transport	4/ 952	17/ 22477	0.235294	0.00489163	0.227182	GENE_004821;GENE_008206;GENE_011744;GENE_012293
4	GO:0009768	BP	photosynthesis, light harvesting in photosystem I	4/ 952	17/ 22477	0.235294	0.00489163	0.227182	GENE_000815;GENE_009371;GENE_010852;GENE_010884
2	GO:0052386	BP	cell wall thickening	2/ 952	3/ 22477	0.666667	0.00522477	0.236112	GENE_003180;GENE_020050
2	GO:0009404	BP	toxin metabolic process	2/ 952	3/ 22477	0.666667	0.00522477	0.236112	GENE_003180;GENE_009413
10	GO:0042744	BP	hydrogen peroxide catabolic process	10/ 952	92/ 22477	0.108696	0.00553472	0.239915	GENE_002194;GENE_005863;GENE_005876;GENE_006836;GENE_007708;GENE_007898;GENE_013346;GENE_018835;GENE_022443;GENE_022562
10	GO:0042743	BP	hydrogen peroxide metabolic process	10/ 952	92/ 22477	0.108696	0.00553472	0.239915	GENE_002194;GENE_005863;GENE_005876;GENE_006836;GENE_007708;GENE_007898;GENE_013346;GENE_018835;GENE_022443;GENE_022562
9	GO:0010410	BP	hemicellulose metabolic process	9/ 952	78/ 22477	0.115385	0.00562352	0.239915	GENE_002276;GENE_012111;GENE_012209;GENE_013534;GENE_016163;GENE_017671;GENE_020050;GENE_022451;GENE_025288
14	GO:0140359	MF	ABC-type transporter activity	14/ 952	154/ 22477	0.0909091	0.00716218	0.247978	GENE_000311;GENE_001973;GENE_002884;GENE_003174;GENE_003832;GENE_005141;GENE_005159;GENE_005226;GENE_017323;GENE_017389;GENE_017406;GENE_017735;GENE_019417;GENE_020563
33	GO:0016705	MF	oxidoreductase activity, acting on paired donors, with incorporation or reduction of molecular oxygen	33/ 952	480/ 22477	0.06875	0.00784825	0.26785	GENE_000849;GENE_002069;GENE_002427;GENE_002577;GENE_003809;GENE_008468;GENE_009074;GENE_009201;GENE_009404;GENE_010406;GENE_012301;GENE_013708;GENE_014848;GENE_015743;GENE_015875;GENE_016232;GENE_017199;GENE_017313;GENE_017419;GENE_017427;GENE_017432;GENE_017813;GENE_019120;GENE_020056;GENE_020093;GENE_020353;GENE_020793;GENE_022365;GENE_022789;GENE_022965;GENE_024831;GENE_025995;GENE_026135
14	GO:0030247	MF	polysaccharide binding	14/ 952	157/ 22477	0.089172	0.00808187	0.271938	GENE_000231;GENE_002856;GENE_003745;GENE_004172;GENE_008883;GENE_010674;GENE_010771;GENE_016710;GENE_018852;GENE_019214;GENE_019226;GENE_019282;GENE_019318;GENE_025148
14	GO:0048046	CC	apoplast	14/ 952	150/ 22477	0.0933333	0.00617911	0.289691	GENE_000267;GENE_002119;GENE_002174;GENE_005907;GENE_007927;GENE_008560;GENE_008630;GENE_013534;GENE_016163;GENE_017671;GENE_019050;GENE_020577;GENE_021648;GENE_024629
65	GO:0009056	BP	catabolic process	65/ 952	1095/ 22477	0.0593607	0.00687145	0.289786	GENE_000267;GENE_000507;GENE_000544;GENE_001071;GENE_002119;GENE_002156;GENE_002174;GENE_002194;GENE_002410;GENE_002413;GENE_003528;GENE_003873;GENE_004156;GENE_004918;GENE_005559;GENE_005863;GENE_005876;GENE_006685;GENE_006742;GENE_006836;GENE_007022;GENE_007708;GENE_007898;GENE_007927;GENE_008025;GENE_008560;GENE_008630;GENE_009413;GENE_009878;GENE_009899;GENE_009959;GENE_010042;GENE_010372;GEN…
9	GO:0006865	BP	amino acid transport	9/ 952	81/ 22477	0.111111	0.00719402	0.299595	GENE_000588;GENE_000816;GENE_001467;GENE_011125;GENE_013334;GENE_016949;GENE_019244;GENE_024262;GENE_026220
3	GO:0007163	BP	establishment or maintenance of cell polarity	3/ 952	10/ 22477	0.3	0.00726736	0.299595	GENE_003318;GENE_008119;GENE_014190
4	GO:0009611	BP	response to wounding	4/ 952	19/ 22477	0.210526	0.00744819	0.303638	GENE_009661;GENE_013815;GENE_016568;GENE_025552
5	GO:0016168	MF	chlorophyll binding	5/ 952	31/ 22477	0.16129	0.00916524	0.304108	GENE_000815;GENE_009371;GENE_010852;GENE_010884;GENE_018796
10	GO:0015293	MF	symporter activity	10/ 952	100/ 22477	0.1	0.00983879	0.3137	GENE_000588;GENE_000816;GENE_001467;GENE_011125;GENE_013334;GENE_016949;GENE_022353;GENE_022611;GENE_024262;GENE_026220
19	GO:0042626	MF	ATPase-coupled transmembrane transporter activity	19/ 952	244/ 22477	0.0778689	0.00984825	0.3137	GENE_000311;GENE_001084;GENE_001615;GENE_001973;GENE_002189;GENE_002884;GENE_003174;GENE_003832;GENE_005141;GENE_005159;GENE_005226;GENE_010869;GENE_017323;GENE_017389;GENE_017406;GENE_017735;GENE_017847;GENE_019417;GENE_020563
2	GO:0004357	MF	glutamate-cysteine ligase activity	2/ 952	4/ 22477	0.5	0.0101561	0.318239	GENE_003031;GENE_003180
107	GO:0016301	MF	kinase activity	107/ 952	1992/ 22477	0.0537149	0.0102572	0.318239	GENE_000231;GENE_001494;GENE_001675;GENE_001786;GENE_002458;GENE_002467;GENE_002595;GENE_003115;GENE_003153;GENE_003280;GENE_003745;GENE_004172;GENE_004254;GENE_004476;GENE_005183;GENE_005369;GENE_005463;GENE_005617;GENE_006477;GENE_006578;GENE_006705;GENE_006857;GENE_007015;GENE_007143;GENE_007376;GENE_007817;GENE_008015;GENE_008464;GENE_008936;GENE_009276;GENE_009396;GENE_009528;GENE_009552;GEN…
6	GO:0045491	BP	xylan metabolic process	6/ 952	42/ 22477	0.142857	0.00809661	0.321249	GENE_002276;GENE_012111;GENE_012209;GENE_020050;GENE_022451;GENE_025288
140	GO:0005524	MF	ATP binding	140/ 952	2700/ 22477	0.0518519	0.0107867	0.330379	GENE_000231;GENE_000311;GENE_001084;GENE_001087;GENE_001317;GENE_001494;GENE_001615;GENE_001675;GENE_001786;GENE_001933;GENE_001973;GENE_002189;GENE_002458;GENE_002467;GENE_002595;GENE_002884;GENE_003031;GENE_003115;GENE_003174;GENE_003180;GENE_003280;GENE_003745;GENE_003832;GENE_004172;GENE_004254;GENE_004651;GENE_005141;GENE_005159;GENE_005183;GENE_005226;GENE_005357;GENE_005369;GENE_005463;GEN…
9	GO:0010383	BP	cell wall polysaccharide metabolic process	9/ 952	84/ 22477	0.107143	0.00907957	0.34701	GENE_002276;GENE_012111;GENE_012209;GENE_013534;GENE_016163;GENE_017671;GENE_020050;GENE_022451;GENE_025288
8	GO:0031047	BP	regulatory ncRNA-mediated gene silencing	8/ 952	70/ 22477	0.114286	0.00932039	0.352541	GENE_000375;GENE_011247;GENE_011254;GENE_011261;GENE_011327;GENE_012171;GENE_012300;GENE_026218
34	GO:0032502	BP	developmental process	34/ 952	506/ 22477	0.0671937	0.00962273	0.358297	GENE_000222;GENE_001087;GENE_001165;GENE_003180;GENE_004918;GENE_005545;GENE_006075;GENE_007399;GENE_008002;GENE_008015;GENE_008545;GENE_009077;GENE_009192;GENE_009422;GENE_012256;GENE_013079;GENE_014901;GENE_015131;GENE_016742;GENE_016920;GENE_017331;GENE_019483;GENE_019617;GENE_020050;GENE_020687;GENE_021274;GENE_023062;GENE_023405;GENE_024086;GENE_024237;GENE_024458;GENE_024831;GENE_025995;GEN…
10	GO:0072593	BP	reactive oxygen species metabolic process	10/ 952	100/ 22477	0.1	0.00983879	0.358297	GENE_002194;GENE_005863;GENE_005876;GENE_006836;GENE_007708;GENE_007898;GENE_013346;GENE_018835;GENE_022443;GENE_022562
34	GO:0055085	BP	transmembrane transport	34/ 952	511/ 22477	0.0665362	0.0100441	0.358297	GENE_000588;GENE_001329;GENE_001961;GENE_002156;GENE_003832;GENE_004821;GENE_004934;GENE_007104;GENE_007132;GENE_007951;GENE_008025;GENE_008206;GENE_008629;GENE_009848;GENE_011744;GENE_012293;GENE_013334;GENE_013518;GENE_014537;GENE_014693;GENE_016949;GENE_016966;GENE_017991;GENE_018567;GENE_018588;GENE_019549;GENE_019900;GENE_022471;GENE_022564;GENE_023148;GENE_023481;GENE_024262;GENE_024749;GEN…
2	GO:0010025	BP	wax biosynthetic process	2/ 952	4/ 22477	0.5	0.0101561	0.358297	GENE_011254;GENE_025281
2	GO:0010166	BP	wax metabolic process	2/ 952	4/ 22477	0.5	0.0101561	0.358297	GENE_011254;GENE_025281
2	GO:0006750	BP	glutathione biosynthetic process	2/ 952	4/ 22477	0.5	0.0101561	0.358297	GENE_003031;GENE_003180
2	GO:0019184	BP	nonribosomal peptide biosynthetic process	2/ 952	4/ 22477	0.5	0.0101561	0.358297	GENE_003031;GENE_003180
8	GO:0009308	BP	amine metabolic process	8/ 952	72/ 22477	0.111111	0.0109802	0.376509	GENE_001136;GENE_004156;GENE_013013;GENE_017917;GENE_022585;GENE_022807;GENE_024317;GENE_025639
12	GO:0098660	BP	inorganic ion transmembrane transport	12/ 952	127/ 22477	0.0944882	0.0117644	0.395995	GENE_002156;GENE_004821;GENE_008025;GENE_008206;GENE_008629;GENE_009848;GENE_011744;GENE_012293;GENE_013518;GENE_016966;GENE_022471;GENE_023148
12	GO:0007166	BP	cell surface receptor signaling pathway	12/ 952	128/ 22477	0.09375	0.0120733	0.399009	GENE_001708;GENE_003115;GENE_003745;GENE_013183;GENE_013753;GENE_016710;GENE_018852;GENE_019214;GENE_019226;GENE_019282;GENE_019318;GENE_025148
3	GO:2000895	BP	hemicellulose catabolic process	3/ 952	12/ 22477	0.25	0.0125064	0.399009	GENE_012111;GENE_012209;GENE_025288
3	GO:0045493	BP	xylan catabolic process	3/ 952	12/ 22477	0.25	0.0125064	0.399009	GENE_012111;GENE_012209;GENE_025288
3	GO:0035435	BP	phosphate ion transmembrane transport	3/ 952	12/ 22477	0.25	0.0125064	0.399009	GENE_004821;GENE_011744;GENE_012293
3	GO:0044347	BP	cell wall polysaccharide catabolic process	3/ 952	12/ 22477	0.25	0.0125064	0.399009	GENE_012111;GENE_012209;GENE_025288
3	GO:0009686	BP	gibberellin biosynthetic process	3/ 952	12/ 22477	0.25	0.0125064	0.399009	GENE_002577;GENE_009378;GENE_024831
9	GO:0071669	BP	plant-type cell wall organization or biogenesis	9/ 952	89/ 22477	0.101124	0.0130223	0.411887	GENE_001326;GENE_002276;GENE_008002;GENE_009422;GENE_012256;GENE_016602;GENE_020687;GENE_022451;GENE_023998
5	GO:0006816	BP	calcium ion transport	5/ 952	34/ 22477	0.147059	0.0135272	0.424198	GENE_002156;GENE_008025;GENE_008629;GENE_010869;GENE_013518
20	GO:0015399	MF	primary active transmembrane transporter activity	20/ 952	271/ 22477	0.0738007	0.0146048	0.437632	GENE_000311;GENE_001084;GENE_001615;GENE_001973;GENE_002189;GENE_002884;GENE_003174;GENE_003832;GENE_005141;GENE_005159;GENE_005226;GENE_010869;GENE_015056;GENE_017323;GENE_017389;GENE_017406;GENE_017735;GENE_017847;GENE_019417;GENE_020563
13	GO:0016209	MF	antioxidant activity	13/ 952	153/ 22477	0.0849673	0.0146549	0.437632	GENE_000868;GENE_002194;GENE_005863;GENE_005876;GENE_006836;GENE_007708;GENE_007898;GENE_010465;GENE_013346;GENE_018835;GENE_022443;GENE_022562;GENE_025660
3	GO:0035312	MF	5'-3' DNA exonuclease activity	3/ 952	13/ 22477	0.230769	0.0157537	0.457059	GENE_010553;GENE_018516;GENE_018532
3	GO:0097599	MF	xylanase activity	3/ 952	13/ 22477	0.230769	0.0157537	0.457059	GENE_012111;GENE_012209;GENE_025288
9	GO:0005507	MF	copper ion binding	9/ 952	92/ 22477	0.0978261	0.0159281	0.457059	GENE_000263;GENE_000267;GENE_002119;GENE_002174;GENE_003947;GENE_007927;GENE_008560;GENE_008630;GENE_022585
2	GO:0047372	MF	acylglycerol lipase activity	2/ 952	5/ 22477	0.4	0.0164533	0.457059	GENE_002410;GENE_002413
2	GO:0045145	MF	single-stranded DNA 5'-3' DNA exonuclease activity	2/ 952	5/ 22477	0.4	0.0164533	0.457059	GENE_018516;GENE_018532
2	GO:0016647	MF	oxidoreductase activity, acting on the CH-NH group of donors, oxygen as acceptor	2/ 952	5/ 22477	0.4	0.0164533	0.457059	GENE_004156;GENE_006862
14	GO:0015297	MF	antiporter activity	14/ 952	167/ 22477	0.0838323	0.0176885	0.480202	GENE_000912;GENE_004821;GENE_007104;GENE_008629;GENE_009848;GENE_016966;GENE_017991;GENE_019900;GENE_022471;GENE_022564;GENE_023481;GENE_023988;GENE_024224;GENE_024896
3	GO:0000003	BP	reproduction	3/ 952	13/ 22477	0.230769	0.0157537	0.481669	GENE_006075;GENE_020050;GENE_023062
6	GO:0019208	MF	phosphatase regulator activity	6/ 952	50/ 22477	0.12	0.0184649	0.484755	GENE_002621;GENE_002671;GENE_002678;GENE_002720;GENE_007305;GENE_015451
6	GO:0019888	MF	protein phosphatase regulator activity	6/ 952	50/ 22477	0.12	0.0184649	0.484755	GENE_002621;GENE_002671;GENE_002678;GENE_002720;GENE_007305;GENE_015451
2	GO:1990547	BP	mitochondrial phosphate ion transmembrane transport	2/ 952	5/ 22477	0.4	0.0164533	0.486833	GENE_011744;GENE_012293
2	GO:0046686	BP	response to cadmium ion	2/ 952	5/ 22477	0.4	0.0164533	0.486833	GENE_003180;GENE_018793
111	GO:0050896	BP	response to stimulus	111/ 952	2112/ 22477	0.0525568	0.0170137	0.490255	GENE_000507;GENE_000815;GENE_000868;GENE_001071;GENE_001148;GENE_001317;GENE_001472;GENE_001481;GENE_002111;GENE_002194;GENE_002458;GENE_002467;GENE_002621;GENE_002671;GENE_002678;GENE_002720;GENE_003180;GENE_003211;GENE_003636;GENE_003984;GENE_004269;GENE_005357;GENE_005551;GENE_005617;GENE_005863;GENE_005876;GENE_006094;GENE_006371;GENE_006836;GENE_006857;GENE_007708;GENE_007898;GENE_008583;GEN…
5	GO:0009738	BP	abscisic acid-activated signaling pathway	5/ 952	36/ 22477	0.138889	0.0171035	0.490255	GENE_002621;GENE_002671;GENE_002678;GENE_002720;GENE_004199
12	GO:0015711	BP	organic anion transport	12/ 952	139/ 22477	0.0863309	0.0175761	0.496051	GENE_000588;GENE_000816;GENE_001467;GENE_004821;GENE_011125;GENE_013334;GENE_014537;GENE_016949;GENE_017991;GENE_019244;GENE_024262;GENE_026220
12	GO:0019748	BP	secondary metabolic process	12/ 952	139/ 22477	0.0863309	0.0175761	0.496051	GENE_000267;GENE_000900;GENE_002119;GENE_002174;GENE_003180;GENE_005907;GENE_006544;GENE_007927;GENE_008560;GENE_008630;GENE_009413;GENE_020577
6	GO:0009521	CC	photosystem	6/ 952	47/ 22477	0.12766	0.0138747	0.504651	GENE_000815;GENE_005336;GENE_009371;GENE_010852;GENE_010884;GENE_018796
4	GO:0010427	MF	abscisic acid binding	4/ 952	25/ 22477	0.16	0.0198934	0.511026	GENE_002621;GENE_002671;GENE_002678;GENE_002720
8	GO:0099402	BP	plant organ development	8/ 952	80/ 22477	0.1	0.0198454	0.54879	GENE_000222;GENE_001087;GENE_007399;GENE_008015;GENE_009192;GENE_017331;GENE_020050;GENE_024086
4	GO:0120252	BP	hydrocarbon metabolic process	4/ 952	25/ 22477	0.16	0.0198934	0.54879	GENE_002577;GENE_002658;GENE_007022;GENE_021693
11	GO:0015849	BP	organic acid transport	11/ 952	124/ 22477	0.0887097	0.0208959	0.567904	GENE_000588;GENE_000816;GENE_001467;GENE_004821;GENE_011125;GENE_013334;GENE_014537;GENE_016949;GENE_019244;GENE_024262;GENE_026220
11	GO:0046942	BP	carboxylic acid transport	11/ 952	124/ 22477	0.0887097	0.0208959	0.567904	GENE_000588;GENE_000816;GENE_001467;GENE_004821;GENE_011125;GENE_013334;GENE_014537;GENE_016949;GENE_019244;GENE_024262;GENE_026220
5	GO:0000278	BP	mitotic cell cycle	5/ 952	38/ 22477	0.131579	0.0212557	0.569249	GENE_001035;GENE_003829;GENE_012224;GENE_013345;GENE_025023
3	GO:0015250	MF	water channel activity	3/ 952	15/ 22477	0.2	0.0235362	0.573171	GENE_001527;GENE_012626;GENE_024819
3	GO:0005372	MF	water transmembrane transporter activity	3/ 952	15/ 22477	0.2	0.0235362	0.573171	GENE_001527;GENE_012626;GENE_024819
3	GO:0015116	MF	sulfate transmembrane transporter activity	3/ 952	15/ 22477	0.2	0.0235362	0.573171	GENE_000248;GENE_001828;GENE_004821
2	GO:0045300	MF	acyl-[acyl-carrier-protein] desaturase activity	2/ 952	6/ 22477	0.333333	0.0239921	0.573171	GENE_008468;GENE_020353
2	GO:0008297	MF	single-stranded DNA exodeoxyribonuclease activity	2/ 952	6/ 22477	0.333333	0.0239921	0.573171	GENE_018516;GENE_018532
20	GO:0035556	BP	intracellular signal transduction	20/ 952	274/ 22477	0.0729927	0.0217529	0.578343	GENE_002156;GENE_003318;GENE_008025;GENE_008119;GENE_009058;GENE_009382;GENE_010843;GENE_010966;GENE_010988;GENE_011691;GENE_013744;GENE_014047;GENE_014344;GENE_015100;GENE_016627;GENE_016782;GENE_016846;GENE_016920;GENE_016952;GENE_023647
2	GO:0051209	BP	release of sequestered calcium ion into cytosol	2/ 952	6/ 22477	0.333333	0.0239921	0.607083	GENE_002156;GENE_008025
2	GO:0051282	BP	regulation of sequestering of calcium ion	2/ 952	6/ 22477	0.333333	0.0239921	0.607083	GENE_002156;GENE_008025
2	GO:0051283	BP	negative regulation of sequestering of calcium ion	2/ 952	6/ 22477	0.333333	0.0239921	0.607083	GENE_002156;GENE_008025
2	GO:0097553	BP	calcium ion transmembrane import into cytosol	2/ 952	6/ 22477	0.333333	0.0239921	0.607083	GENE_002156;GENE_008025
4	GO:0019840	MF	isoprenoid binding	4/ 952	27/ 22477	0.148148	0.0258273	0.610904	GENE_002621;GENE_002671;GENE_002678;GENE_002720
11	GO:0050832	BP	defense response to fungus	11/ 952	129/ 22477	0.0852713	0.0249466	0.622647	GENE_002458;GENE_002467;GENE_003180;GENE_006094;GENE_006857;GENE_008835;GENE_017900;GENE_018821;GENE_018829;GENE_020427;GENE_024257
13	GO:0038023	MF	signaling receptor activity	13/ 952	163/ 22477	0.0797546	0.0284401	0.645208	GENE_002621;GENE_002671;GENE_002678;GENE_002720;GENE_006477;GENE_009857;GENE_009995;GENE_016920;GENE_018779;GENE_020311;GENE_023125;GENE_023314;GENE_024914
5	GO:0008509	MF	monoatomic anion transmembrane transporter activity	5/ 952	41/ 22477	0.121951	0.0286279	0.645208	GENE_000248;GENE_001713;GENE_001828;GENE_008206;GENE_011757
3	GO:0036297	BP	interstrand cross-link repair	3/ 952	16/ 22477	0.1875	0.0280748	0.673245	GENE_010553;GENE_018516;GENE_018532
3	GO:0030422	BP	siRNA processing	3/ 952	16/ 22477	0.1875	0.0280748	0.673245	GENE_011254;GENE_011638;GENE_026218
3	GO:0009850	BP	auxin metabolic process	3/ 952	16/ 22477	0.1875	0.0280748	0.673245	GENE_011726;GENE_013377;GENE_021565
6	GO:0008081	MF	phosphoric diester hydrolase activity	6/ 952	56/ 22477	0.107143	0.0305412	0.681897	GENE_002156;GENE_003528;GENE_008025;GENE_008119;GENE_022462;GENE_024332
4	GO:0009834	BP	plant-type secondary cell wall biogenesis	4/ 952	28/ 22477	0.142857	0.029151	0.68561	GENE_001326;GENE_002276;GENE_022451;GENE_023998
4	GO:0009664	BP	plant-type cell wall organization	4/ 952	28/ 22477	0.142857	0.029151	0.68561	GENE_008002;GENE_009422;GENE_012256;GENE_020687
2	GO:0010179	MF	IAA-Ala conjugate hydrolase activity	2/ 952	7/ 22477	0.285714	0.0326561	0.685993	GENE_011726;GENE_021565
2	GO:0004435	MF	phosphatidylinositol phospholipase C activity	2/ 952	7/ 22477	0.285714	0.0326561	0.685993	GENE_002156;GENE_008025
2	GO:0010178	MF	IAA-amino acid conjugate hydrolase activity	2/ 952	7/ 22477	0.285714	0.0326561	0.685993	GENE_011726;GENE_021565
2	GO:0004629	MF	phospholipase C activity	2/ 952	7/ 22477	0.285714	0.0326561	0.685993	GENE_002156;GENE_008025
4	GO:0042562	MF	hormone binding	4/ 952	29/ 22477	0.137931	0.0327165	0.685993	GENE_002621;GENE_002671;GENE_002678;GENE_002720
8	GO:0008374	MF	O-acyltransferase activity	8/ 952	88/ 22477	0.0909091	0.0328987	0.685993	GENE_000653;GENE_002136;GENE_005552;GENE_007871;GENE_007919;GENE_012945;GENE_017928;GENE_019805
3	GO:0033612	MF	receptor serine/threonine kinase binding	3/ 952	17/ 22477	0.176471	0.0330427	0.685993	GENE_010980;GENE_011564;GENE_022743
51	GO:0004674	MF	protein serine/threonine kinase activity	51/ 952	892/ 22477	0.0571749	0.033309	0.685993	GENE_001786;GENE_003745;GENE_004254;GENE_005183;GENE_006477;GENE_006578;GENE_006705;GENE_006857;GENE_007015;GENE_009552;GENE_009854;GENE_009857;GENE_009995;GENE_010043;GENE_010119;GENE_010674;GENE_010771;GENE_010966;GENE_011564;GENE_011689;GENE_012122;GENE_014040;GENE_014344;GENE_016710;GENE_016782;GENE_016952;GENE_017553;GENE_017618;GENE_017708;GENE_017744;GENE_018779;GENE_018852;GENE_019214;GEN…
5	GO:0016413	MF	O-acetyltransferase activity	5/ 952	43/ 22477	0.116279	0.0343395	0.696853	GENE_005552;GENE_007871;GENE_007919;GENE_012945;GENE_019805
148	GO:0035639	MF	purine ribonucleoside triphosphate binding	148/ 952	2977/ 22477	0.0497145	0.0355504	0.70775	GENE_000231;GENE_000311;GENE_001035;GENE_001084;GENE_001087;GENE_001317;GENE_001494;GENE_001615;GENE_001675;GENE_001786;GENE_001933;GENE_001973;GENE_002189;GENE_002458;GENE_002467;GENE_002595;GENE_002884;GENE_003031;GENE_003115;GENE_003174;GENE_003180;GENE_003280;GENE_003318;GENE_003745;GENE_003829;GENE_003832;GENE_004172;GENE_004254;GENE_004651;GENE_005141;GENE_005159;GENE_005183;GENE_005226;GEN…
4	GO:0043178	MF	alcohol binding	4/ 952	30/ 22477	0.133333	0.0365253	0.719624	GENE_002621;GENE_002671;GENE_002678;GENE_002720
5	GO:0009523	CC	photosystem II	5/ 952	38/ 22477	0.131579	0.0212557	0.734238	GENE_000815;GENE_009371;GENE_010852;GENE_010884;GENE_018796
17	GO:0071554	BP	cell wall organization or biogenesis	17/ 952	234/ 22477	0.0726496	0.0315264	0.736755	GENE_001326;GENE_002276;GENE_003180;GENE_005667;GENE_008002;GENE_009422;GENE_012256;GENE_013534;GENE_013875;GENE_016163;GENE_016602;GENE_017671;GENE_020050;GENE_020687;GENE_022451;GENE_023998;GENE_025620
2	GO:0015556	MF	C4-dicarboxylate transmembrane transporter activity	2/ 952	8/ 22477	0.25	0.0423368	0.749516	GENE_004821;GENE_023467
2	GO:0015140	MF	malate transmembrane transporter activity	2/ 952	8/ 22477	0.25	0.0423368	0.749516	GENE_004821;GENE_023467
2	GO:0005310	MF	dicarboxylic acid transmembrane transporter activity	2/ 952	8/ 22477	0.25	0.0423368	0.749516	GENE_004821;GENE_023467
1	GO:0052615	MF	ent-kaurene oxidase activity	1/ 952	1/ 22477	1	0.0423544	0.749516	GENE_002577
1	GO:0102128	MF	chalcone synthase activity	1/ 952	1/ 22477	1	0.0423544	0.749516	GENE_000900
1	GO:0008115	MF	sarcosine oxidase activity	1/ 952	1/ 22477	1	0.0423544	0.749516	GENE_006862
1	GO:0047720	MF	indoleacetaldoxime dehydratase activity	1/ 952	1/ 22477	1	0.0423544	0.749516	GENE_020793
1	GO:0052722	MF	fatty acid in-chain hydroxylase activity	1/ 952	1/ 22477	1	0.0423544	0.749516	GENE_025995
1	GO:0018580	MF	nitronate monooxygenase activity	1/ 952	1/ 22477	1	0.0423544	0.749516	GENE_018793
1	GO:0004097	MF	catechol oxidase activity	1/ 952	1/ 22477	1	0.0423544	0.749516	GENE_015266
1	GO:0016210	MF	naringenin-chalcone synthase activity	1/ 952	1/ 22477	1	0.0423544	0.749516	GENE_000900
1	GO:0050614	MF	delta24-sterol reductase activity	1/ 952	1/ 22477	1	0.0423544	0.749516	GENE_014168
1	GO:0048039	MF	ubiquinone binding	1/ 952	1/ 22477	1	0.0423544	0.749516	GENE_002442
111	GO:0006796	BP	phosphate-containing compound metabolic process	111/ 952	2160/ 22477	0.0513889	0.0325448	0.75574	GENE_000231;GENE_000656;GENE_001084;GENE_001494;GENE_001786;GENE_002458;GENE_002467;GENE_002595;GENE_003115;GENE_003153;GENE_003280;GENE_003745;GENE_004172;GENE_004254;GENE_004476;GENE_005183;GENE_005336;GENE_005369;GENE_005463;GENE_005617;GENE_006477;GENE_006578;GENE_006705;GENE_006857;GENE_007015;GENE_007143;GENE_007376;GENE_008015;GENE_008936;GENE_009186;GENE_009396;GENE_009528;GENE_009552;GEN…
3	GO:0045927	BP	positive regulation of growth	3/ 952	17/ 22477	0.176471	0.0330427	0.762475	GENE_001148;GENE_003746;GENE_020591
6	GO:0042445	BP	hormone metabolic process	6/ 952	58/ 22477	0.103448	0.0354943	0.765509	GENE_001136;GENE_011726;GENE_013377;GENE_017917;GENE_021565;GENE_025639
4	GO:0070588	BP	calcium ion transmembrane transport	4/ 952	30/ 22477	0.133333	0.0365253	0.765509	GENE_002156;GENE_008025;GENE_008629;GENE_013518
7	GO:0140115	BP	export across plasma membrane	7/ 952	74/ 22477	0.0945946	0.0369573	0.765509	GENE_007104;GENE_007132;GENE_019900;GENE_022564;GENE_023481;GENE_024749;GENE_024896
5	GO:0040008	BP	regulation of growth	5/ 952	44/ 22477	0.113636	0.0374411	0.765509	GENE_001148;GENE_003746;GENE_004193;GENE_020591;GENE_022743
12	GO:0009620	BP	response to fungus	12/ 952	151/ 22477	0.0794702	0.038092	0.765509	GENE_002458;GENE_002467;GENE_003180;GENE_006094;GENE_006857;GENE_008835;GENE_017900;GENE_018793;GENE_018821;GENE_018829;GENE_020427;GENE_024257
49	GO:0006629	BP	lipid metabolic process	49/ 952	868/ 22477	0.0564516	0.0390178	0.765509	GENE_000868;GENE_002136;GENE_002156;GENE_002410;GENE_002413;GENE_002577;GENE_002658;GENE_003528;GENE_005320;GENE_005883;GENE_006160;GENE_006742;GENE_007022;GENE_007038;GENE_008025;GENE_008468;GENE_009378;GENE_009878;GENE_009899;GENE_009959;GENE_010188;GENE_010565;GENE_010625;GENE_010725;GENE_011254;GENE_011668;GENE_012933;GENE_014168;GENE_014848;GENE_015875;GENE_017599;GENE_017928;GENE_019022;GEN…
7	GO:0016101	BP	diterpenoid metabolic process	7/ 952	75/ 22477	0.0933333	0.0393344	0.765509	GENE_002577;GENE_009378;GENE_010565;GENE_010625;GENE_015875;GENE_017599;GENE_024831
16	GO:0065008	BP	regulation of biological quality	16/ 952	218/ 22477	0.0733945	0.0395499	0.765509	GENE_001084;GENE_001136;GENE_001329;GENE_003318;GENE_005336;GENE_007132;GENE_008119;GENE_011726;GENE_013377;GENE_013809;GENE_017917;GENE_021378;GENE_021565;GENE_022471;GENE_024749;GENE_025639
4	GO:0006563	BP	L-serine metabolic process	4/ 952	31/ 22477	0.129032	0.0405787	0.765509	GENE_005552;GENE_015663;GENE_020584;GENE_022482
2	GO:0048316	BP	seed development	2/ 952	8/ 22477	0.25	0.0423368	0.765509	GENE_021274;GENE_024237
2	GO:0035194	BP	regulatory ncRNA-mediated post-transcriptional gene silencing	2/ 952	8/ 22477	0.25	0.0423368	0.765509	GENE_012171;GENE_012300
1	GO:0009780	BP	photosynthetic NADP+ reduction	1/ 952	1/ 22477	1	0.0423544	0.765509	GENE_005336
1	GO:0052482	BP	defense response by cell wall thickening	1/ 952	1/ 22477	1	0.0423544	0.765509	GENE_003180
1	GO:0052544	BP	defense response by callose deposition in cell wall	1/ 952	1/ 22477	1	0.0423544	0.765509	GENE_003180
1	GO:0010771	BP	negative regulation of cell morphogenesis	1/ 952	1/ 22477	1	0.0423544	0.765509	GENE_004193
1	GO:0002213	BP	defense response to insect	1/ 952	1/ 22477	1	0.0423544	0.765509	GENE_003180
1	GO:1901347	BP	negative regulation of secondary cell wall biogenesis	1/ 952	1/ 22477	1	0.0423544	0.765509	GENE_004193
1	GO:0052315	BP	phytoalexin biosynthetic process	1/ 952	1/ 22477	1	0.0423544	0.765509	GENE_003180
1	GO:1903338	BP	regulation of cell wall organization or biogenesis	1/ 952	1/ 22477	1	0.0423544	0.765509	GENE_004193
1	GO:0042550	BP	photosystem I stabilization	1/ 952	1/ 22477	1	0.0423544	0.765509	GENE_005336
1	GO:0009403	BP	toxin biosynthetic process	1/ 952	1/ 22477	1	0.0423544	0.765509	GENE_003180
1	GO:0046217	BP	indole phytoalexin metabolic process	1/ 952	1/ 22477	1	0.0423544	0.765509	GENE_003180
1	GO:2000652	BP	regulation of secondary cell wall biogenesis	1/ 952	1/ 22477	1	0.0423544	0.765509	GENE_004193
1	GO:0043434	BP	response to peptide hormone	1/ 952	1/ 22477	1	0.0423544	0.765509	GENE_001148
1	GO:0010721	BP	negative regulation of cell development	1/ 952	1/ 22477	1	0.0423544	0.765509	GENE_004193
1	GO:0010478	BP	chlororespiration	1/ 952	1/ 22477	1	0.0423544	0.765509	GENE_001933
1	GO:0002933	BP	lipid hydroxylation	1/ 952	1/ 22477	1	0.0423544	0.765509	GENE_025995
1	GO:0033331	BP	ent-kaurene metabolic process	1/ 952	1/ 22477	1	0.0423544	0.765509	GENE_002577
1	GO:0032504	BP	multicellular organism reproduction	1/ 952	1/ 22477	1	0.0423544	0.765509	GENE_020050
1	GO:1903339	BP	negative regulation of cell wall organization or biogenesis	1/ 952	1/ 22477	1	0.0423544	0.765509	GENE_004193
1	GO:0010241	BP	ent-kaurene oxidation to kaurenoic acid	1/ 952	1/ 22477	1	0.0423544	0.765509	GENE_002577
1	GO:0010453	BP	regulation of cell fate commitment	1/ 952	1/ 22477	1	0.0423544	0.765509	GENE_015671
1	GO:0042659	BP	regulation of cell fate specification	1/ 952	1/ 22477	1	0.0423544	0.765509	GENE_015671
1	GO:0009700	BP	indole phytoalexin biosynthetic process	1/ 952	1/ 22477	1	0.0423544	0.765509	GENE_003180
1	GO:0051511	BP	negative regulation of unidimensional cell growth	1/ 952	1/ 22477	1	0.0423544	0.765509	GENE_004193
1	GO:1901652	BP	response to peptide	1/ 952	1/ 22477	1	0.0423544	0.765509	GENE_001148
1	GO:0052314	BP	phytoalexin metabolic process	1/ 952	1/ 22477	1	0.0423544	0.765509	GENE_003180
1	GO:0045595	BP	regulation of cell differentiation	1/ 952	1/ 22477	1	0.0423544	0.765509	GENE_004193
1	GO:1900057	BP	positive regulation of leaf senescence	1/ 952	1/ 22477	1	0.0423544	0.765509	GENE_015671
1	GO:0060284	BP	regulation of cell development	1/ 952	1/ 22477	1	0.0423544	0.765509	GENE_004193
1	GO:0045596	BP	negative regulation of cell differentiation	1/ 952	1/ 22477	1	0.0423544	0.765509	GENE_004193
51	GO:0006952	BP	defense response	51/ 952	908/ 22477	0.0561674	0.0428695	0.77102	GENE_001071;GENE_002111;GENE_002458;GENE_002467;GENE_002621;GENE_002671;GENE_002678;GENE_002720;GENE_003180;GENE_003211;GENE_003636;GENE_003984;GENE_004269;GENE_005551;GENE_005617;GENE_006094;GENE_006857;GENE_008835;GENE_009857;GENE_009995;GENE_010371;GENE_011228;GENE_011252;GENE_011691;GENE_012171;GENE_012300;GENE_012638;GENE_013386;GENE_014898;GENE_017073;GENE_017900;GENE_018230;GENE_018779;GEN…
3	GO:0004869	MF	cysteine-type endopeptidase inhibitor activity	3/ 952	19/ 22477	0.157895	0.044245	0.776889	GENE_016032;GENE_016093;GENE_017282
4	GO:0004864	MF	protein phosphatase inhibitor activity	4/ 952	32/ 22477	0.125	0.0448768	0.776889	GENE_002621;GENE_002671;GENE_002678;GENE_002720
4	GO:0019212	MF	phosphatase inhibitor activity	4/ 952	32/ 22477	0.125	0.0448768	0.776889	GENE_002621;GENE_002671;GENE_002678;GENE_002720
9	GO:0008514	MF	organic anion transmembrane transporter activity	9/ 952	106/ 22477	0.0849057	0.0460344	0.791196	GENE_000588;GENE_000912;GENE_004821;GENE_013334;GENE_016949;GENE_017991;GENE_023467;GENE_023988;GENE_024262
111	GO:0006793	BP	phosphorus metabolic process	111/ 952	2190/ 22477	0.0506849	0.0443255	0.793318	GENE_000231;GENE_000656;GENE_001084;GENE_001494;GENE_001786;GENE_002458;GENE_002467;GENE_002595;GENE_003115;GENE_003153;GENE_003280;GENE_003745;GENE_004172;GENE_004254;GENE_004476;GENE_005183;GENE_005336;GENE_005369;GENE_005463;GENE_005617;GENE_006477;GENE_006578;GENE_006705;GENE_006857;GENE_007015;GENE_007143;GENE_007376;GENE_008015;GENE_008936;GENE_009186;GENE_009396;GENE_009528;GENE_009552;GEN…
34	GO:0009607	BP	response to biotic stimulus	34/ 952	574/ 22477	0.0592334	0.045947	0.818348	GENE_002458;GENE_002467;GENE_002671;GENE_002678;GENE_002720;GENE_003180;GENE_003211;GENE_003636;GENE_005617;GENE_006094;GENE_006857;GENE_008835;GENE_009857;GENE_009995;GENE_010371;GENE_011254;GENE_012171;GENE_012300;GENE_013386;GENE_017073;GENE_017900;GENE_018779;GENE_018793;GENE_018821;GENE_018829;GENE_018947;GENE_020302;GENE_020311;GENE_020414;GENE_020427;GENE_021488;GENE_023125;GENE_023314;GEN…
12	GO:0006979	BP	response to oxidative stress	12/ 952	159/ 22477	0.0754717	0.0462828	0.820322	GENE_000868;GENE_002194;GENE_003180;GENE_005863;GENE_005876;GENE_006836;GENE_007708;GENE_007898;GENE_013346;GENE_018835;GENE_022443;GENE_022562
654	GO:0110165	CC	cellular anatomical entity	654/ 952	14729/ 22477	0.0444022	0.0365414	1	GENE_000044;GENE_000084;GENE_000195;GENE_000222;GENE_000231;GENE_000248;GENE_000267;GENE_000311;GENE_000489;GENE_000507;GENE_000566;GENE_000577;GENE_000588;GENE_000656;GENE_000815;GENE_000816;GENE_000849;GENE_000868;GENE_000912;GENE_000960;GENE_000962;GENE_001035;GENE_001046;GENE_001071;GENE_001087;GENE_001106;GENE_001148;GENE_001165;GENE_001256;GENE_001277;GENE_001287;GENE_001307;GENE_001317;GEN…
6	GO:0005777	CC	peroxisome	6/ 952	59/ 22477	0.101695	0.0381533	1	GENE_001770;GENE_004156;GENE_004346;GENE_011568;GENE_017571;GENE_021869
1	GO:1903600	CC	glutaminase complex	1/ 952	1/ 22477	1	0.0423544	1	GENE_023946
2. DA P.m 5DPI vs DA CK 5DPI
Number	GO ID	Term Type	Description	Ratio_in_study	Ratio_in_pop	Rich factor	Pvalue	Padjust	Gene_ids
7	GO:0016042	BP	lipid catabolic process	7/ 260	154/ 22477	0.0454545	0.00214757	0.716312	GENE_009959;GENE_013474;GENE_013503;GENE_020323;GENE_021972;GENE_024577;GENE_024717
6	GO:0048046	CC	apoplast	6/ 260	150/ 22477	0.04	0.00810888	0.807847	GENE_005821;GENE_005841;GENE_014580;GENE_024040;GENE_024049;GENE_025593
13	GO:0005576	CC	extracellular region	13/ 260	511/ 22477	0.0254403	0.00927567	0.821412	GENE_001255;GENE_005821;GENE_005841;GENE_008978;GENE_009329;GENE_013432;GENE_014580;GENE_021520;GENE_021935;GENE_024040;GENE_024049;GENE_024822;GENE_025593
2	GO:0005199	MF	structural constituent of cell wall	2/ 260	6/ 22477	0.333333	0.00193901	0.946587	GENE_018154;GENE_023833
6	GO:0016298	MF	lipase activity	6/ 260	113/ 22477	0.0530973	0.00203661	0.946587	GENE_009959;GENE_013474;GENE_013503;GENE_020323;GENE_021972;GENE_024577
4	GO:0004620	MF	phospholipase activity	4/ 260	50/ 22477	0.08	0.00265382	0.946587	GENE_013474;GENE_013503;GENE_020323;GENE_021972
2	GO:0009694	BP	jasmonic acid metabolic process	2/ 260	11/ 22477	0.181818	0.00684327	1	GENE_011146;GENE_020149
10	GO:0009755	BP	hormone-mediated signaling pathway	10/ 260	344/ 22477	0.0290698	0.00701653	1	GENE_006483;GENE_006703;GENE_010226;GENE_011411;GENE_011634;GENE_016846;GENE_020270;GENE_023161;GENE_024213;GENE_025593
3	GO:0031347	BP	regulation of defense response	3/ 260	37/ 22477	0.0810811	0.00889481	1	GENE_020363;GENE_021521;GENE_025282
2	GO:2000022	BP	regulation of jasmonic acid mediated signaling pathway	2/ 260	13/ 22477	0.153846	0.00955833	1	GENE_020363;GENE_021521
2	GO:0001676	BP	long-chain fatty acid metabolic process	2/ 260	13/ 22477	0.153846	0.00955833	1	GENE_011146;GENE_020149
2	GO:0009611	BP	response to wounding	2/ 260	19/ 22477	0.105263	0.0200226	1	GENE_020363;GENE_021521
1	GO:0048834	BP	specification of petal number	1/ 260	2/ 22477	0.5	0.0230015	1	GENE_010933
1	GO:0033528	BP	S-methylmethionine cycle	1/ 260	2/ 22477	0.5	0.0230015	1	GENE_020901
1	GO:0048833	BP	specification of floral organ number	1/ 260	2/ 22477	0.5	0.0230015	1	GENE_010933
1	GO:0048832	BP	specification of plant organ number	1/ 260	2/ 22477	0.5	0.0230015	1	GENE_010933
1	GO:0033477	BP	S-methylmethionine metabolic process	1/ 260	2/ 22477	0.5	0.0230015	1	GENE_020901
1	GO:0015942	BP	formate metabolic process	1/ 260	2/ 22477	0.5	0.0230015	1	GENE_000495
1	GO:0042183	BP	formate catabolic process	1/ 260	2/ 22477	0.5	0.0230015	1	GENE_000495
2	GO:0009691	BP	cytokinin biosynthetic process	2/ 260	21/ 22477	0.0952381	0.0242204	1	GENE_011634;GENE_023955
20	GO:1901575	BP	organic substance catabolic process	20/ 260	1041/ 22477	0.0192123	0.0249429	1	GENE_000495;GENE_001255;GENE_005821;GENE_005841;GENE_009959;GENE_012424;GENE_013432;GENE_013474;GENE_013503;GENE_013836;GENE_013875;GENE_015793;GENE_016697;GENE_019858;GENE_020323;GENE_021935;GENE_021972;GENE_024577;GENE_024717;GENE_024822
3	GO:0042445	BP	hormone metabolic process	3/ 260	58/ 22477	0.0517241	0.029612	1	GENE_011146;GENE_011634;GENE_023955
3	GO:0080134	BP	regulation of response to stress	3/ 260	61/ 22477	0.0491803	0.0336861	1	GENE_020363;GENE_021521;GENE_025282
1	GO:0048441	BP	petal development	1/ 260	3/ 22477	0.333333	0.0343038	1	GENE_010933
1	GO:0090691	BP	formation of plant organ boundary	1/ 260	3/ 22477	0.333333	0.0343038	1	GENE_010933
1	GO:0010199	BP	organ boundary specification between lateral organs and the meristem	1/ 260	3/ 22477	0.333333	0.0343038	1	GENE_010933
1	GO:0048859	BP	formation of anatomical boundary	1/ 260	3/ 22477	0.333333	0.0343038	1	GENE_010933
1	GO:0048437	BP	floral organ development	1/ 260	3/ 22477	0.333333	0.0343038	1	GENE_010933
2	GO:0009690	BP	cytokinin metabolic process	2/ 260	27/ 22477	0.0740741	0.0386955	1	GENE_011634;GENE_023955
20	GO:0009056	BP	catabolic process	20/ 260	1095/ 22477	0.0182648	0.0413263	1	GENE_000495;GENE_001255;GENE_005821;GENE_005841;GENE_009959;GENE_012424;GENE_013432;GENE_013474;GENE_013503;GENE_013836;GENE_013875;GENE_015793;GENE_016697;GENE_019858;GENE_020323;GENE_021935;GENE_021972;GENE_024577;GENE_024717;GENE_024822
2	GO:0009737	BP	response to abscisic acid	2/ 260	28/ 22477	0.0714286	0.0413607	1	GENE_001058;GENE_025030
2	GO:0097305	BP	response to alcohol	2/ 260	28/ 22477	0.0714286	0.0413607	1	GENE_001058;GENE_025030
2	GO:0009664	BP	plant-type cell wall organization	2/ 260	28/ 22477	0.0714286	0.0413607	1	GENE_018154;GENE_023833
1	GO:0072488	BP	ammonium transmembrane transport	1/ 260	4/ 22477	0.25	0.0454758	1	GENE_023148
4	GO:0009698	BP	phenylpropanoid metabolic process	4/ 260	117/ 22477	0.034188	0.0471291	1	GENE_005821;GENE_005841;GENE_012654;GENE_014580
2	GO:0042446	BP	hormone biosynthetic process	2/ 260	31/ 22477	0.0645161	0.0497505	1	GENE_011634;GENE_023955
2	GO:0008519	MF	ammonium transmembrane transporter activity	2/ 260	9/ 22477	0.222222	0.00454809	1	GENE_015367;GENE_023148
2	GO:0008970	MF	phospholipase A1 activity	2/ 260	10/ 22477	0.2	0.00564189	1	GENE_013474;GENE_013503
28	GO:0022857	MF	transmembrane transporter activity	28/ 260	1436/ 22477	0.0194986	0.00683838	1	GENE_000091;GENE_000724;GENE_000966;GENE_002189;GENE_004292;GENE_005833;GENE_006703;GENE_007951;GENE_008859;GENE_009273;GENE_010055;GENE_013141;GENE_014691;GENE_014792;GENE_015049;GENE_015367;GENE_015372;GENE_015397;GENE_016829;GENE_017389;GENE_019783;GENE_022568;GENE_022972;GENE_023148;GENE_023513;GENE_024213;GENE_024560;GENE_025970
28	GO:0005215	MF	transporter activity	28/ 260	1486/ 22477	0.0188425	0.0112883	1	GENE_000091;GENE_000724;GENE_000966;GENE_002189;GENE_004292;GENE_005833;GENE_006703;GENE_007951;GENE_008859;GENE_009273;GENE_010055;GENE_013141;GENE_014691;GENE_014792;GENE_015049;GENE_015367;GENE_015372;GENE_015397;GENE_016829;GENE_017389;GENE_019783;GENE_022568;GENE_022972;GENE_023148;GENE_023513;GENE_024213;GENE_024560;GENE_025970
1	GO:0004459	MF	L-lactate dehydrogenase activity	1/ 260	1/ 22477	1	0.0115674	1	GENE_008895
1	GO:1990404	MF	NAD+-protein ADP-ribosyltransferase activity	1/ 260	1/ 22477	1	0.0115674	1	GENE_005240
10	GO:0030234	MF	enzyme regulator activity	10/ 260	380/ 22477	0.0263158	0.0134609	1	GENE_001294;GENE_001427;GENE_006115;GENE_006999;GENE_012704;GENE_013836;GENE_013875;GENE_016527;GENE_023161;GENE_025312
32	GO:0016491	MF	oxidoreductase activity	32/ 260	1813/ 22477	0.0176503	0.0157237	1	GENE_000407;GENE_000495;GENE_002465;GENE_004089;GENE_004208;GENE_005239;GENE_005597;GENE_005821;GENE_005841;GENE_008801;GENE_008895;GENE_009397;GENE_009696;GENE_012301;GENE_012336;GENE_012654;GENE_014580;GENE_014810;GENE_014856;GENE_015049;GENE_015612;GENE_015793;GENE_019011;GENE_019402;GENE_020149;GENE_021935;GENE_022518;GENE_022585;GENE_024111;GENE_024744;GENE_024822;GENE_025549
2	GO:0042937	MF	tripeptide transmembrane transporter activity	2/ 260	18/ 22477	0.111111	0.018051	1	GENE_007951;GENE_016829
2	GO:0071916	MF	dipeptide transmembrane transporter activity	2/ 260	18/ 22477	0.111111	0.018051	1	GENE_007951;GENE_016829
2	GO:0008146	MF	sulfotransferase activity	2/ 260	20/ 22477	0.1	0.0220798	1	GENE_022254;GENE_025248
4	GO:0005507	MF	copper ion binding	4/ 260	92/ 22477	0.0434783	0.022132	1	GENE_005821;GENE_005841;GENE_015049;GENE_022585
1	GO:0016621	MF	cinnamoyl-CoA reductase activity	1/ 260	2/ 22477	0.5	0.0230015	1	GENE_009696
1	GO:0008863	MF	formate dehydrogenase (NAD+) activity	1/ 260	2/ 22477	0.5	0.0230015	1	GENE_000495
1	GO:0008898	MF	S-adenosylmethionine-homocysteine S-methyltransferase activity	1/ 260	2/ 22477	0.5	0.0230015	1	GENE_020901
1	GO:0004352	MF	glutamate dehydrogenase (NAD+) activity	1/ 260	2/ 22477	0.5	0.0230015	1	GENE_015793
5	GO:0000987	MF	cis-regulatory region sequence-specific DNA binding	5/ 260	141/ 22477	0.035461	0.0242174	1	GENE_004045;GENE_004813;GENE_022808;GENE_025096;GENE_026028
2	GO:0016638	MF	oxidoreductase activity, acting on the CH-NH2 group of donors	2/ 260	21/ 22477	0.0952381	0.0242204	1	GENE_015793;GENE_022585
7	GO:0008289	MF	lipid binding	7/ 260	248/ 22477	0.0282258	0.0257744	1	GENE_010314;GENE_010371;GENE_020515;GENE_023100;GENE_023161;GENE_023241;GENE_023316
5	GO:0052689	MF	carboxylic ester hydrolase activity	5/ 260	144/ 22477	0.0347222	0.0262175	1	GENE_013474;GENE_013503;GENE_013836;GENE_013875;GENE_021972
3	GO:0030145	MF	manganese ion binding	3/ 260	56/ 22477	0.0535714	0.0270504	1	GENE_024040;GENE_024049;GENE_025593
8	GO:0001067	MF	transcription regulatory region nucleic acid binding	8/ 260	310/ 22477	0.0258065	0.028392	1	GENE_004045;GENE_004813;GENE_006621;GENE_018714;GENE_022808;GENE_025096;GENE_025982;GENE_026028
8	GO:0000976	MF	transcription cis-regulatory region binding	8/ 260	310/ 22477	0.0258065	0.028392	1	GENE_004045;GENE_004813;GENE_006621;GENE_018714;GENE_022808;GENE_025096;GENE_025982;GENE_026028
2	GO:0046910	MF	pectinesterase inhibitor activity	2/ 260	24/ 22477	0.0833333	0.0311209	1	GENE_013836;GENE_013875
10	GO:0098772	MF	molecular function regulator activity	10/ 260	417/ 22477	0.0239808	0.031391	1	GENE_001294;GENE_001427;GENE_006115;GENE_006999;GENE_012704;GENE_013836;GENE_013875;GENE_016527;GENE_023161;GENE_025312
8	GO:0005509	MF	calcium ion binding	8/ 260	318/ 22477	0.0251572	0.0323057	1	GENE_001294;GENE_006115;GENE_010225;GENE_011061;GENE_014856;GENE_018852;GENE_020323;GENE_025883
8	GO:1990837	MF	sequence-specific double-stranded DNA binding	8/ 260	321/ 22477	0.0249221	0.0338639	1	GENE_004045;GENE_004813;GENE_006621;GENE_018714;GENE_022808;GENE_025096;GENE_025982;GENE_026028
1	GO:0004353	MF	glutamate dehydrogenase [NAD(P)+] activity	1/ 260	3/ 22477	0.333333	0.0343038	1	GENE_015793
1	GO:0008515	MF	sucrose transmembrane transporter activity	1/ 260	3/ 22477	0.333333	0.0343038	1	GENE_005833
1	GO:0008506	MF	sucrose:proton symporter activity	1/ 260	3/ 22477	0.333333	0.0343038	1	GENE_005833
1	GO:0000822	MF	inositol hexakisphosphate binding	1/ 260	3/ 22477	0.333333	0.0343038	1	GENE_000091
1	GO:0009669	MF	sucrose:monoatomic cation symporter activity	1/ 260	3/ 22477	0.333333	0.0343038	1	GENE_005833
5	GO:0004857	MF	enzyme inhibitor activity	5/ 260	160/ 22477	0.03125	0.0386504	1	GENE_012704;GENE_013836;GENE_013875;GENE_023161;GENE_025312
5	GO:0140678	MF	molecular function inhibitor activity	5/ 260	162/ 22477	0.0308642	0.0404187	1	GENE_012704;GENE_013836;GENE_013875;GENE_023161;GENE_025312
1	GO:0047631	MF	ADP-ribose diphosphatase activity	1/ 260	4/ 22477	0.25	0.0454758	1	GENE_025852
1	GO:0035529	MF	NADH pyrophosphatase activity	1/ 260	4/ 22477	0.25	0.0454758	1	GENE_025852
1	GO:0004457	MF	lactate dehydrogenase activity	1/ 260	4/ 22477	0.25	0.0454758	1	GENE_008895
1	GO:0004551	MF	dinucleotide phosphatase activity	1/ 260	4/ 22477	0.25	0.0454758	1	GENE_025852
1	GO:0015157	MF	oligosaccharide transmembrane transporter activity	1/ 260	4/ 22477	0.25	0.0454758	1	GENE_005833
1	GO:0015154	MF	disaccharide transmembrane transporter activity	1/ 260	4/ 22477	0.25	0.0454758	1	GENE_005833
2	GO:0043178	MF	alcohol binding	2/ 260	30/ 22477	0.0666667	0.0468901	1	GENE_000091;GENE_023161
12	GO:0043565	MF	sequence-specific DNA binding	12/ 260	582/ 22477	0.0206186	0.0474782	1	GENE_004045;GENE_004813;GENE_005437;GENE_006621;GENE_012623;GENE_015397;GENE_018714;GENE_022808;GENE_025096;GENE_025299;GENE_025982;GENE_026028
3. DK P.m 1DPI vs DK CK 1DPI
Number	GO ID	Term Type	Description	Ratio_in_study	Ratio_in_pop	Rich factor	Pvalue	Padjust	Gene_ids
3	GO:0009074	BP	aromatic amino acid family catabolic process	3/ 88	20/ 22477	0.15	6.29944e-05	0.0919632	GENE_002273;GENE_003406;GENE_016727
8	GO:0046394	BP	carboxylic acid biosynthetic process	8/ 88	364/ 22477	0.021978	9.12057e-05	0.0919632	GENE_001253;GENE_002273;GENE_015371;GENE_016727;GENE_018849;GENE_019330;GENE_020439;GENE_026133
8	GO:0016053	BP	organic acid biosynthetic process	8/ 88	364/ 22477	0.021978	9.12057e-05	0.0919632	GENE_001253;GENE_002273;GENE_015371;GENE_016727;GENE_018849;GENE_019330;GENE_020439;GENE_026133
4	GO:0009072	BP	aromatic amino acid metabolic process	4/ 88	62/ 22477	0.0645161	0.000102886	0.0919632	GENE_001253;GENE_002273;GENE_003406;GENE_016727
2	GO:0009800	BP	cinnamic acid biosynthetic process	2/ 88	5/ 22477	0.4	0.00015039	0.0919632	GENE_002273;GENE_016727
2	GO:0009803	BP	cinnamic acid metabolic process	2/ 88	5/ 22477	0.4	0.00015039	0.0919632	GENE_002273;GENE_016727
6	GO:1901605	BP	alpha-amino acid metabolic process	6/ 88	223/ 22477	0.0269058	0.000245416	0.128633	GENE_002273;GENE_003406;GENE_015371;GENE_016727;GENE_020439;GENE_020965
10	GO:0019752	BP	carboxylic acid metabolic process	10/ 88	717/ 22477	0.013947	0.00049159	0.194586	GENE_001253;GENE_002273;GENE_003406;GENE_015371;GENE_016727;GENE_018849;GENE_019330;GENE_020439;GENE_020965;GENE_026133
7	GO:0006520	BP	amino acid metabolic process	7/ 88	364/ 22477	0.0192308	0.000568735	0.194586	GENE_001253;GENE_002273;GENE_003406;GENE_015371;GENE_016727;GENE_020439;GENE_020965
10	GO:0043436	BP	oxoacid metabolic process	10/ 88	732/ 22477	0.0136612	0.000577261	0.194586	GENE_001253;GENE_002273;GENE_003406;GENE_015371;GENE_016727;GENE_018849;GENE_019330;GENE_020439;GENE_020965;GENE_026133
10	GO:0006082	BP	organic acid metabolic process	10/ 88	733/ 22477	0.0136426	0.000583387	0.194586	GENE_001253;GENE_002273;GENE_003406;GENE_015371;GENE_016727;GENE_018849;GENE_019330;GENE_020439;GENE_020965;GENE_026133
8	GO:0044283	BP	small molecule biosynthetic process	8/ 88	502/ 22477	0.0159363	0.000788174	0.238488	GENE_001253;GENE_002273;GENE_015371;GENE_016727;GENE_018849;GENE_019330;GENE_020439;GENE_026133
2	GO:0120255	BP	olefinic compound biosynthetic process	2/ 88	12/ 22477	0.166667	0.000975012	0.238488	GENE_002273;GENE_016727
2	GO:1902222	BP	erythrose 4-phosphate/phosphoenolpyruvate family amino acid catabolic process	2/ 88	12/ 22477	0.166667	0.000975012	0.238488	GENE_002273;GENE_016727
2	GO:0006559	BP	L-phenylalanine catabolic process	2/ 88	12/ 22477	0.166667	0.000975012	0.238488	GENE_002273;GENE_016727
2	GO:0120254	BP	olefinic compound metabolic process	2/ 88	13/ 22477	0.153846	0.00114936	0.263562	GENE_002273;GENE_016727
2	GO:0042537	BP	benzene-containing compound metabolic process	2/ 88	15/ 22477	0.133333	0.00153935	0.332228	GENE_002273;GENE_016727
3	GO:1901606	BP	alpha-amino acid catabolic process	3/ 88	64/ 22477	0.046875	0.00203332	0.40836	GENE_002273;GENE_003406;GENE_016727
2	GO:0006558	BP	L-phenylalanine metabolic process	2/ 88	18/ 22477	0.111111	0.002226	0.40836	GENE_002273;GENE_016727
2	GO:1902221	BP	erythrose 4-phosphate/phosphoenolpyruvate family amino acid metabolic process	2/ 88	18/ 22477	0.111111	0.002226	0.40836	GENE_002273;GENE_016727
2	GO:0009608	BP	response to symbiont	2/ 88	22/ 22477	0.0909091	0.00332684	0.50859	GENE_000979;GENE_005543
2	GO:0006555	BP	methionine metabolic process	2/ 88	22/ 22477	0.0909091	0.00332684	0.50859	GENE_015371;GENE_020439
2	GO:0009610	BP	response to symbiotic fungus	2/ 88	22/ 22477	0.0909091	0.00332684	0.50859	GENE_000979;GENE_005543
2	GO:0009086	BP	methionine biosynthetic process	2/ 88	22/ 22477	0.0909091	0.00332684	0.50859	GENE_015371;GENE_020439
2	GO:0045548	MF	phenylalanine ammonia-lyase activity	2/ 88	6/ 22477	0.333333	0.000225009	0.532092	GENE_002273;GENE_016727
4	GO:0071949	MF	FAD binding	4/ 88	92/ 22477	0.0434783	0.000471338	0.532092	GENE_016250;GENE_020439;GENE_024620;GENE_026133
2	GO:0016841	MF	ammonia-lyase activity	2/ 88	10/ 22477	0.2	0.000668177	0.532092	GENE_002273;GENE_016727
1	GO:0022417	BP	protein maturation by protein folding	1/ 88	1/ 22477	1	0.00391511	0.552483	GENE_011140
1	GO:0045041	BP	protein import into mitochondrial intermembrane space	1/ 88	1/ 22477	1	0.00391511	0.552483	GENE_011140
4	GO:0019439	BP	aromatic compound catabolic process	4/ 88	177/ 22477	0.0225989	0.00518512	0.702568	GENE_002273;GENE_003406;GENE_005786;GENE_016727
2	GO:0006730	BP	one-carbon metabolic process	2/ 88	28/ 22477	0.0714286	0.00536165	0.702568	GENE_000338;GENE_020439
3	GO:0044272	BP	sulfur compound biosynthetic process	3/ 88	92/ 22477	0.0326087	0.00566544	0.716775	GENE_000338;GENE_015371;GENE_020439
4	GO:1901361	BP	organic cyclic compound catabolic process	4/ 88	185/ 22477	0.0216216	0.00605301	0.740283	GENE_002273;GENE_003406;GENE_005786;GENE_016727
1	GO:0001709	BP	cell fate determination	1/ 88	2/ 22477	0.5	0.00781507	0.896047	GENE_016963
11	GO:0044281	BP	small molecule metabolic process	11/ 88	1235/ 22477	0.00890688	0.00870449	0.967781	GENE_000338;GENE_001253;GENE_002273;GENE_003406;GENE_015371;GENE_016727;GENE_018849;GENE_019330;GENE_020439;GENE_020965;GENE_026133
2	GO:0042886	BP	amide transport	2/ 88	38/ 22477	0.0526316	0.00972226	1	GENE_009976;GENE_018403
6	GO:0044248	BP	cellular catabolic process	6/ 88	473/ 22477	0.012685	0.0106885	1	GENE_002273;GENE_003406;GENE_005786;GENE_005863;GENE_008937;GENE_016727
3	GO:0009698	BP	phenylpropanoid metabolic process	3/ 88	117/ 22477	0.025641	0.0109437	1	GENE_002273;GENE_005786;GENE_016727
3	GO:0016054	BP	organic acid catabolic process	3/ 88	120/ 22477	0.025	0.0117166	1	GENE_002273;GENE_003406;GENE_016727
3	GO:0046395	BP	carboxylic acid catabolic process	3/ 88	120/ 22477	0.025	0.0117166	1	GENE_002273;GENE_003406;GENE_016727
2	GO:0009067	BP	aspartate family amino acid biosynthetic process	2/ 88	42/ 22477	0.047619	0.0117876	1	GENE_015371;GENE_020439
2	GO:0000097	BP	sulfur amino acid biosynthetic process	2/ 88	43/ 22477	0.0465116	0.0123315	1	GENE_015371;GENE_020439
2	GO:0000096	BP	sulfur amino acid metabolic process	2/ 88	46/ 22477	0.0434783	0.0140275	1	GENE_015371;GENE_020439
2	GO:0009066	BP	aspartate family amino acid metabolic process	2/ 88	48/ 22477	0.0416667	0.015211	1	GENE_015371;GENE_020439
1	GO:0006556	BP	S-adenosylmethionine biosynthetic process	1/ 88	4/ 22477	0.25	0.0155698	1	GENE_000338
3	GO:0019748	BP	secondary metabolic process	3/ 88	139/ 22477	0.0215827	0.0173321	1	GENE_002273;GENE_005786;GENE_016727
3	GO:0072330	BP	monocarboxylic acid biosynthetic process	3/ 88	150/ 22477	0.02	0.0211603	1	GENE_002273;GENE_016727;GENE_018849
3	GO:0044282	BP	small molecule catabolic process	3/ 88	153/ 22477	0.0196078	0.0222784	1	GENE_002273;GENE_003406;GENE_016727
1	GO:0046500	BP	S-adenosylmethionine metabolic process	1/ 88	6/ 22477	0.166667	0.0232645	1	GENE_000338
3	GO:0006790	BP	sulfur compound metabolic process	3/ 88	158/ 22477	0.0189873	0.0242125	1	GENE_000338;GENE_015371;GENE_020439
1	GO:0006572	BP	tyrosine catabolic process	1/ 88	7/ 22477	0.142857	0.0270896	1	GENE_003406
3	GO:0008652	BP	amino acid biosynthetic process	3/ 88	168/ 22477	0.0178571	0.0283455	1	GENE_001253;GENE_015371;GENE_020439
2	GO:0009063	BP	amino acid catabolic process	2/ 88	73/ 22477	0.0273973	0.0332823	1	GENE_002273;GENE_016727
2	GO:0009699	BP	phenylpropanoid biosynthetic process	2/ 88	74/ 22477	0.027027	0.0341214	1	GENE_002273;GENE_016727
1	GO:0009718	BP	anthocyanin-containing compound biosynthetic process	1/ 88	10/ 22477	0.1	0.0384761	1	GENE_001461
1	GO:0046283	BP	anthocyanin-containing compound metabolic process	1/ 88	11/ 22477	0.0909091	0.0422422	1	GENE_001461
1	GO:0019853	BP	L-ascorbic acid biosynthetic process	1/ 88	11/ 22477	0.0909091	0.0422422	1	GENE_026133
2	GO:0044550	BP	secondary metabolite biosynthetic process	2/ 88	85/ 22477	0.0235294	0.0438778	1	GENE_002273;GENE_016727
1	GO:0009423	BP	chorismate biosynthetic process	1/ 88	12/ 22477	0.0833333	0.0459938	1	GENE_001253
1	GO:0009686	BP	gibberellin biosynthetic process	1/ 88	12/ 22477	0.0833333	0.0459938	1	GENE_019330
1	GO:0019852	BP	L-ascorbic acid metabolic process	1/ 88	13/ 22477	0.0769231	0.0497308	1	GENE_026133
1	GO:0035999	BP	tetrahydrofolate interconversion	1/ 88	13/ 22477	0.0769231	0.0497308	1	GENE_020439
1	GO:1901336	BP	lactone biosynthetic process	1/ 88	13/ 22477	0.0769231	0.0497308	1	GENE_026133
1	GO:0035657	CC	eRF1 methyltransferase complex	1/ 88	1/ 22477	1	0.00391511	1	GENE_016515
2	GO:0009506	CC	plasmodesma	2/ 88	48/ 22477	0.0416667	0.015211	1	GENE_019672;GENE_023580
2	GO:0005911	CC	cell-cell junction	2/ 88	48/ 22477	0.0416667	0.015211	1	GENE_019672;GENE_023580
2	GO:0030054	CC	cell junction	2/ 88	48/ 22477	0.0416667	0.015211	1	GENE_019672;GENE_023580
2	GO:0070161	CC	anchoring junction	2/ 88	48/ 22477	0.0416667	0.015211	1	GENE_019672;GENE_023580
1	GO:0005758	CC	mitochondrial intermembrane space	1/ 88	7/ 22477	0.142857	0.0270896	1	GENE_011140
1	GO:0031970	CC	organelle envelope lumen	1/ 88	7/ 22477	0.142857	0.0270896	1	GENE_011140
1	GO:0019773	CC	proteasome core complex, alpha-subunit complex	1/ 88	13/ 22477	0.0769231	0.0497308	1	GENE_013203
1	GO:0004489	MF	methylenetetrahydrofolate reductase (NAD(P)H) activity	1/ 88	1/ 22477	1	0.00391511	1	GENE_020439
1	GO:0047890	MF	flavanone 4-reductase activity	1/ 88	1/ 22477	1	0.00391511	1	GENE_001461
4	GO:0050660	MF	flavin adenine dinucleotide binding	4/ 88	167/ 22477	0.0239521	0.00422312	1	GENE_016250;GENE_020439;GENE_024620;GENE_026133
15	GO:0016491	MF	oxidoreductase activity	15/ 88	1813/ 22477	0.00827358	0.00494671	1	GENE_001461;GENE_005786;GENE_005863;GENE_006017;GENE_009397;GENE_011140;GENE_013330;GENE_016250;GENE_016777;GENE_019299;GENE_019330;GENE_020439;GENE_021369;GENE_024620;GENE_026133
2	GO:0016840	MF	carbon-nitrogen lyase activity	2/ 88	32/ 22477	0.0625	0.00696445	1	GENE_002273;GENE_016727
1	GO:0045552	MF	dihydrokaempferol 4-reductase activity	1/ 88	2/ 22477	0.5	0.00781507	1	GENE_001461
1	GO:0070547	MF	L-tyrosine aminotransferase activity	1/ 88	2/ 22477	0.5	0.00781507	1	GENE_003406
1	GO:0004838	MF	L-tyrosine:2-oxoglutarate aminotransferase activity	1/ 88	2/ 22477	0.5	0.00781507	1	GENE_003406
1	GO:0003871	MF	5-methyltetrahydropteroyltriglutamate-homocysteine S-methyltransferase activity	1/ 88	3/ 22477	0.333333	0.0116999	1	GENE_015371
1	GO:0042085	MF	5-methyltetrahydropteroyltri-L-glutamate-dependent methyltransferase activity	1/ 88	3/ 22477	0.333333	0.0116999	1	GENE_015371
1	GO:0050105	MF	L-gulonolactone oxidase activity	1/ 88	3/ 22477	0.333333	0.0116999	1	GENE_026133
1	GO:0003849	MF	3-deoxy-7-phosphoheptulonate synthase activity	1/ 88	3/ 22477	0.333333	0.0116999	1	GENE_001253
1	GO:0008705	MF	methionine synthase activity	1/ 88	4/ 22477	0.25	0.0155698	1	GENE_015371
1	GO:0042084	MF	5-methyltetrahydrofolate-dependent methyltransferase activity	1/ 88	4/ 22477	0.25	0.0155698	1	GENE_015371
1	GO:0004478	MF	methionine adenosyltransferase activity	1/ 88	4/ 22477	0.25	0.0155698	1	GENE_000338
2	GO:0035673	MF	oligopeptide transmembrane transporter activity	2/ 88	50/ 22477	0.04	0.016436	1	GENE_009976;GENE_023523
2	GO:1904680	MF	peptide transmembrane transporter activity	2/ 88	50/ 22477	0.04	0.016436	1	GENE_009976;GENE_023523
54	GO:0003824	MF	catalytic activity	54/ 88	10954/ 22477	0.00492971	0.0186647	1	GENE_000338;GENE_000979;GENE_001253;GENE_001461;GENE_001896;GENE_002273;GENE_002676;GENE_003406;GENE_004212;GENE_004693;GENE_005543;GENE_005786;GENE_005863;GENE_006017;GENE_009397;GENE_009995;GENE_011140;GENE_011411;GENE_011576;GENE_012027;GENE_013330;GENE_013534;GENE_014542;GENE_014590;GENE_015371;GENE_015642;GENE_016250;GENE_016515;GENE_016727;GENE_016777;GENE_017678;GENE_017848;GENE_018849;GEN…
1	GO:0045544	MF	gibberellin 20-oxidase activity	1/ 88	5/ 22477	0.2	0.0194246	1	GENE_019330
1	GO:0047372	MF	acylglycerol lipase activity	1/ 88	5/ 22477	0.2	0.0194246	1	GENE_021972
1	GO:0003885	MF	D-arabinono-1,4-lactone oxidase activity	1/ 88	5/ 22477	0.2	0.0194246	1	GENE_026133
2	GO:0042887	MF	amide transmembrane transporter activity	2/ 88	56/ 22477	0.0357143	0.0203528	1	GENE_009976;GENE_023523
1	GO:0008172	MF	S-methyltransferase activity	1/ 88	6/ 22477	0.166667	0.0232645	1	GENE_015371
1	GO:0016207	MF	4-coumarate-CoA ligase activity	1/ 88	7/ 22477	0.142857	0.0270896	1	GENE_022473
1	GO:0016646	MF	oxidoreductase activity, acting on the CH-NH group of donors, NAD or NADP as acceptor	1/ 88	9/ 22477	0.111111	0.0346953	1	GENE_020439
1	GO:0008252	MF	nucleotidase activity	1/ 88	12/ 22477	0.0833333	0.0459938	1	GENE_025707
1	GO:0016899	MF	oxidoreductase activity, acting on the CH-OH group of donors, oxygen as acceptor	1/ 88	13/ 22477	0.0769231	0.0497308	1	GENE_026133
1	GO:0005351	MF	carbohydrate:proton symporter activity	1/ 88	13/ 22477	0.0769231	0.0497308	1	GENE_024069
1	GO:0005402	MF	carbohydrate:monoatomic cation symporter activity	1/ 88	13/ 22477	0.0769231	0.0497308	1	GENE_024069
1	GO:0000774	MF	adenyl-nucleotide exchange factor activity	1/ 88	13/ 22477	0.0769231	0.0497308	1	GENE_021378
4. DK P.m 5DPI vs DK CK 5DPI
Number	GO ID	Term Type	Description	Ratio_in_study	Ratio_in_pop	Rich factor	Pvalue	Padjust	Gene_ids
311	GO:0004672	MF	protein kinase activity	311/ 2880	1496/ 22477	0.207888	4.47369e-19	2.67191e-16	GENE_000002;GENE_000013;GENE_000132;GENE_000183;GENE_000231;GENE_000237;GENE_000268;GENE_000273;GENE_000440;GENE_000459;GENE_000928;GENE_000992;GENE_001388;GENE_001490;GENE_001494;GENE_001586;GENE_001653;GENE_001712;GENE_001769;GENE_001786;GENE_001914;GENE_002027;GENE_002083;GENE_002182;GENE_002323;GENE_002459;GENE_002467;GENE_002595;GENE_002846;GENE_002859;GENE_002874;GENE_003107;GENE_003142;GEN…
331	GO:0016773	MF	phosphotransferase activity, alcohol group as acceptor	331/ 2880	1641/ 22477	0.201706	3.46319e-18	1.65471e-15	GENE_000002;GENE_000013;GENE_000132;GENE_000183;GENE_000231;GENE_000237;GENE_000268;GENE_000273;GENE_000440;GENE_000459;GENE_000780;GENE_000928;GENE_000992;GENE_001388;GENE_001490;GENE_001494;GENE_001586;GENE_001653;GENE_001712;GENE_001769;GENE_001786;GENE_001914;GENE_002027;GENE_002083;GENE_002182;GENE_002323;GENE_002459;GENE_002467;GENE_002595;GENE_002846;GENE_002859;GENE_002874;GENE_003107;GEN…
337	GO:0016310	BP	phosphorylation	337/ 2880	1768/ 22477	0.190611	9.01673e-15	3.00749e-12	GENE_000002;GENE_000013;GENE_000132;GENE_000183;GENE_000231;GENE_000237;GENE_000268;GENE_000273;GENE_000440;GENE_000459;GENE_000485;GENE_000780;GENE_000928;GENE_000992;GENE_001156;GENE_001388;GENE_001490;GENE_001494;GENE_001627;GENE_001653;GENE_001712;GENE_001763;GENE_001786;GENE_001914;GENE_002027;GENE_002083;GENE_002178;GENE_002182;GENE_002323;GENE_002459;GENE_002467;GENE_002595;GENE_002846;GEN…
369	GO:0016301	MF	kinase activity	369/ 2880	1992/ 22477	0.185241	2.60004e-14	8.87358e-12	GENE_000002;GENE_000013;GENE_000132;GENE_000183;GENE_000231;GENE_000237;GENE_000268;GENE_000273;GENE_000440;GENE_000459;GENE_000485;GENE_000780;GENE_000928;GENE_000992;GENE_001156;GENE_001388;GENE_001490;GENE_001494;GENE_001586;GENE_001627;GENE_001653;GENE_001712;GENE_001763;GENE_001769;GENE_001786;GENE_001914;GENE_002027;GENE_002083;GENE_002178;GENE_002182;GENE_002323;GENE_002459;GENE_002467;GEN…
395	GO:0006793	BP	phosphorus metabolic process	395/ 2880	2190/ 22477	0.180365	1.78671e-13	4.68246e-11	GENE_000002;GENE_000013;GENE_000132;GENE_000141;GENE_000183;GENE_000231;GENE_000237;GENE_000268;GENE_000273;GENE_000432;GENE_000440;GENE_000459;GENE_000485;GENE_000517;GENE_000595;GENE_000614;GENE_000780;GENE_000928;GENE_000992;GENE_001156;GENE_001388;GENE_001490;GENE_001494;GENE_001556;GENE_001627;GENE_001653;GENE_001712;GENE_001763;GENE_001786;GENE_001790;GENE_001914;GENE_002027;GENE_002054;GEN…
390	GO:0006796	BP	phosphate-containing compound metabolic process	390/ 2880	2160/ 22477	0.180556	2.13553e-13	5.2235e-11	GENE_000002;GENE_000013;GENE_000132;GENE_000141;GENE_000183;GENE_000231;GENE_000237;GENE_000268;GENE_000273;GENE_000432;GENE_000440;GENE_000459;GENE_000485;GENE_000517;GENE_000595;GENE_000614;GENE_000780;GENE_000928;GENE_000992;GENE_001156;GENE_001388;GENE_001490;GENE_001494;GENE_001556;GENE_001627;GENE_001653;GENE_001712;GENE_001763;GENE_001786;GENE_001790;GENE_001914;GENE_002027;GENE_002054;GEN…
650	GO:0043168	MF	anion binding	650/ 2880	3981/ 22477	0.163276	1.05893e-12	2.81641e-10	GENE_000002;GENE_000003;GENE_000013;GENE_000101;GENE_000132;GENE_000183;GENE_000231;GENE_000237;GENE_000268;GENE_000273;GENE_000311;GENE_000322;GENE_000338;GENE_000432;GENE_000440;GENE_000459;GENE_000486;GENE_000589;GENE_000614;GENE_000688;GENE_000752;GENE_000780;GENE_000819;GENE_000928;GENE_000933;GENE_000992;GENE_001022;GENE_001067;GENE_001087;GENE_001298;GENE_001317;GENE_001373;GENE_001388;GEN…
664	GO:0036094	MF	small molecule binding	664/ 2880	4080/ 22477	0.162745	1.17891e-12	2.81641e-10	GENE_000002;GENE_000003;GENE_000013;GENE_000101;GENE_000132;GENE_000183;GENE_000231;GENE_000237;GENE_000268;GENE_000273;GENE_000311;GENE_000322;GENE_000338;GENE_000432;GENE_000440;GENE_000459;GENE_000486;GENE_000517;GENE_000589;GENE_000614;GENE_000688;GENE_000752;GENE_000780;GENE_000819;GENE_000928;GENE_000933;GENE_000992;GENE_001022;GENE_001067;GENE_001087;GENE_001298;GENE_001317;GENE_001373;GEN…
540	GO:0032559	MF	adenyl ribonucleotide binding	540/ 2880	3254/ 22477	0.16595	1.33974e-11	2.90967e-09	GENE_000002;GENE_000003;GENE_000013;GENE_000101;GENE_000132;GENE_000183;GENE_000231;GENE_000237;GENE_000268;GENE_000273;GENE_000311;GENE_000322;GENE_000338;GENE_000432;GENE_000440;GENE_000459;GENE_000486;GENE_000614;GENE_000688;GENE_000752;GENE_000780;GENE_000928;GENE_000933;GENE_000992;GENE_001022;GENE_001067;GENE_001087;GENE_001298;GENE_001317;GENE_001373;GENE_001388;GENE_001490;GENE_001494;GEN…
562	GO:0030554	MF	adenyl nucleotide binding	562/ 2880	3418/ 22477	0.164424	2.33351e-11	4.54176e-09	GENE_000002;GENE_000003;GENE_000013;GENE_000101;GENE_000132;GENE_000183;GENE_000231;GENE_000237;GENE_000268;GENE_000273;GENE_000311;GENE_000322;GENE_000338;GENE_000432;GENE_000440;GENE_000459;GENE_000486;GENE_000517;GENE_000614;GENE_000688;GENE_000752;GENE_000780;GENE_000928;GENE_000933;GENE_000992;GENE_001022;GENE_001067;GENE_001087;GENE_001298;GENE_001317;GENE_001373;GENE_001388;GENE_001490;GEN…
627	GO:1901265	MF	nucleoside phosphate binding	627/ 2880	3882/ 22477	0.161515	2.66156e-11	4.54176e-09	GENE_000002;GENE_000003;GENE_000013;GENE_000101;GENE_000132;GENE_000183;GENE_000231;GENE_000237;GENE_000268;GENE_000273;GENE_000311;GENE_000322;GENE_000338;GENE_000432;GENE_000440;GENE_000459;GENE_000486;GENE_000517;GENE_000589;GENE_000614;GENE_000688;GENE_000752;GENE_000780;GENE_000819;GENE_000928;GENE_000933;GENE_000992;GENE_001022;GENE_001067;GENE_001087;GENE_001298;GENE_001317;GENE_001373;GEN…
627	GO:0000166	MF	nucleotide binding	627/ 2880	3882/ 22477	0.161515	2.66156e-11	4.54176e-09	GENE_000002;GENE_000003;GENE_000013;GENE_000101;GENE_000132;GENE_000183;GENE_000231;GENE_000237;GENE_000268;GENE_000273;GENE_000311;GENE_000322;GENE_000338;GENE_000432;GENE_000440;GENE_000459;GENE_000486;GENE_000517;GENE_000589;GENE_000614;GENE_000688;GENE_000752;GENE_000780;GENE_000819;GENE_000928;GENE_000933;GENE_000992;GENE_001022;GENE_001067;GENE_001087;GENE_001298;GENE_001317;GENE_001373;GEN…
458	GO:0005524	MF	ATP binding	458/ 2880	2700/ 22477	0.16963	3.01615e-11	4.80373e-09	GENE_000002;GENE_000003;GENE_000013;GENE_000101;GENE_000132;GENE_000183;GENE_000231;GENE_000237;GENE_000268;GENE_000273;GENE_000311;GENE_000322;GENE_000338;GENE_000432;GENE_000440;GENE_000459;GENE_000486;GENE_000614;GENE_000688;GENE_000752;GENE_000780;GENE_000928;GENE_000992;GENE_001022;GENE_001067;GENE_001087;GENE_001298;GENE_001317;GENE_001373;GENE_001388;GENE_001490;GENE_001494;GENE_001541;GEN…
1556	GO:0003824	MF	catalytic activity	1556/ 2880	10954/ 22477	0.142049	1.25276e-09	1.49242e-07
581	GO:0097367	MF	carbohydrate derivative binding	581/ 2880	3656/ 22477	0.158917	3.02025e-09	3.13712e-07	GENE_000002;GENE_000003;GENE_000013;GENE_000101;GENE_000132;GENE_000183;GENE_000231;GENE_000237;GENE_000268;GENE_000273;GENE_000311;GENE_000322;GENE_000338;GENE_000432;GENE_000440;GENE_000459;GENE_000486;GENE_000614;GENE_000688;GENE_000752;GENE_000780;GENE_000819;GENE_000928;GENE_000933;GENE_000992;GENE_001022;GENE_001067;GENE_001087;GENE_001298;GENE_001317;GENE_001373;GENE_001388;GENE_001490;GEN…
176	GO:0004674	MF	protein serine/threonine kinase activity	176/ 2880	892/ 22477	0.197309	3.29119e-09	3.2761e-07	GENE_000002;GENE_000013;GENE_000459;GENE_001490;GENE_001653;GENE_001712;GENE_001786;GENE_001914;GENE_002083;GENE_002182;GENE_002459;GENE_002846;GENE_002874;GENE_003107;GENE_003142;GENE_003432;GENE_003530;GENE_003647;GENE_003745;GENE_004060;GENE_004155;GENE_004159;GENE_004253;GENE_004254;GENE_004520;GENE_004608;GENE_004711;GENE_004835;GENE_005168;GENE_005486;GENE_005910;GENE_006201;GENE_006245;GEN…
565	GO:0032553	MF	ribonucleotide binding	565/ 2880	3563/ 22477	0.158574	7.76333e-09	7.13331e-07	GENE_000002;GENE_000003;GENE_000013;GENE_000101;GENE_000132;GENE_000183;GENE_000231;GENE_000237;GENE_000268;GENE_000273;GENE_000311;GENE_000322;GENE_000338;GENE_000432;GENE_000440;GENE_000459;GENE_000486;GENE_000614;GENE_000688;GENE_000752;GENE_000780;GENE_000819;GENE_000928;GENE_000933;GENE_000992;GENE_001022;GENE_001067;GENE_001087;GENE_001298;GENE_001317;GENE_001373;GENE_001388;GENE_001490;GEN…
95	GO:0030246	MF	carbohydrate binding	95/ 2880	412/ 22477	0.230583	9.99108e-09	8.84025e-07	GENE_000013;GENE_000231;GENE_000237;GENE_000268;GENE_001914;GENE_002856;GENE_003284;GENE_003285;GENE_003647;GENE_003745;GENE_004172;GENE_004702;GENE_004708;GENE_004711;GENE_004717;GENE_004835;GENE_005168;GENE_005194;GENE_005664;GENE_005910;GENE_006541;GENE_006554;GENE_006848;GENE_007008;GENE_007855;GENE_008169;GENE_008566;GENE_009995;GENE_010285;GENE_010674;GENE_011090;GENE_011157;GENE_013027;GEN…
559	GO:0032555	MF	purine ribonucleotide binding	559/ 2880	3530/ 22477	0.158357	1.11629e-08	9.52433e-07	GENE_000002;GENE_000003;GENE_000013;GENE_000101;GENE_000132;GENE_000183;GENE_000231;GENE_000237;GENE_000268;GENE_000273;GENE_000311;GENE_000322;GENE_000338;GENE_000432;GENE_000440;GENE_000459;GENE_000486;GENE_000614;GENE_000688;GENE_000752;GENE_000780;GENE_000819;GENE_000928;GENE_000933;GENE_000992;GENE_001022;GENE_001067;GENE_001087;GENE_001298;GENE_001317;GENE_001373;GENE_001388;GENE_001490;GEN…
581	GO:0017076	MF	purine nucleotide binding	581/ 2880	3694/ 22477	0.157282	1.49627e-08	1.23262e-06	GENE_000002;GENE_000003;GENE_000013;GENE_000101;GENE_000132;GENE_000183;GENE_000231;GENE_000237;GENE_000268;GENE_000273;GENE_000311;GENE_000322;GENE_000338;GENE_000432;GENE_000440;GENE_000459;GENE_000486;GENE_000517;GENE_000614;GENE_000688;GENE_000752;GENE_000780;GENE_000819;GENE_000928;GENE_000933;GENE_000992;GENE_001022;GENE_001067;GENE_001087;GENE_001298;GENE_001317;GENE_001373;GENE_001388;GEN…
263	GO:0005215	MF	transporter activity	263/ 2880	1486/ 22477	0.176985	2.17763e-08	1.62574e-06	GENE_000003;GENE_000101;GENE_000133;GENE_000248;GENE_000259;GENE_000311;GENE_000322;GENE_000588;GENE_000688;GENE_000816;GENE_000872;GENE_000914;GENE_000962;GENE_000987;GENE_001298;GENE_001339;GENE_001353;GENE_001373;GENE_001374;GENE_001541;GENE_001589;GENE_001615;GENE_001622;GENE_001856;GENE_001893;GENE_001896;GENE_001922;GENE_001973;GENE_001994;GENE_002061;GENE_002072;GENE_002380;GENE_002385;GEN…
716	GO:0016740	MF	transferase activity	716/ 2880	4683/ 22477	0.152893	2.3578e-08	1.70691e-06	GENE_000002;GENE_000013;GENE_000017;GENE_000132;GENE_000141;GENE_000183;GENE_000195;GENE_000204;GENE_000231;GENE_000237;GENE_000265;GENE_000268;GENE_000273;GENE_000338;GENE_000387;GENE_000435;GENE_000440;GENE_000459;GENE_000479;GENE_000485;GENE_000494;GENE_000535;GENE_000564;GENE_000608;GENE_000653;GENE_000780;GENE_000830;GENE_000900;GENE_000915;GENE_000928;GENE_000992;GENE_001060;GENE_001146;GEN…
254	GO:0022857	MF	transmembrane transporter activity	254/ 2880	1436/ 22477	0.17688	4.18672e-08	2.86053e-06	GENE_000003;GENE_000133;GENE_000248;GENE_000259;GENE_000311;GENE_000322;GENE_000588;GENE_000688;GENE_000816;GENE_000872;GENE_000914;GENE_000962;GENE_000987;GENE_001298;GENE_001339;GENE_001353;GENE_001373;GENE_001374;GENE_001541;GENE_001589;GENE_001615;GENE_001622;GENE_001856;GENE_001893;GENE_001896;GENE_001922;GENE_001973;GENE_001994;GENE_002061;GENE_002072;GENE_002380;GENE_002385;GENE_002406;GEN…
477	GO:0035639	MF	purine ribonucleoside triphosphate binding	477/ 2880	2977/ 22477	0.160228	4.19082e-08	2.86053e-06	GENE_000002;GENE_000003;GENE_000013;GENE_000101;GENE_000132;GENE_000183;GENE_000231;GENE_000237;GENE_000268;GENE_000273;GENE_000311;GENE_000322;GENE_000338;GENE_000432;GENE_000440;GENE_000459;GENE_000486;GENE_000614;GENE_000688;GENE_000752;GENE_000780;GENE_000819;GENE_000928;GENE_000992;GENE_001022;GENE_001067;GENE_001087;GENE_001298;GENE_001317;GENE_001373;GENE_001388;GENE_001490;GENE_001494;GEN…
407	GO:0016772	MF	transferase activity, transferring phosphorus-containing groups	407/ 2880	2488/ 22477	0.163585	5.10882e-08	3.39027e-06	GENE_000002;GENE_000013;GENE_000132;GENE_000141;GENE_000183;GENE_000231;GENE_000237;GENE_000268;GENE_000273;GENE_000440;GENE_000459;GENE_000485;GENE_000780;GENE_000928;GENE_000992;GENE_001156;GENE_001388;GENE_001490;GENE_001494;GENE_001586;GENE_001627;GENE_001653;GENE_001712;GENE_001738;GENE_001763;GENE_001769;GENE_001786;GENE_001914;GENE_002027;GENE_002083;GENE_002178;GENE_002182;GENE_002236;GEN…
119	GO:0009607	BP	response to biotic stimulus	119/ 2880	574/ 22477	0.207317	8.42059e-08	9.0868e-06	GENE_000933;GENE_000992;GENE_001153;GENE_001586;GENE_001680;GENE_001769;GENE_002307;GENE_002467;GENE_002666;GENE_002671;GENE_002678;GENE_002744;GENE_002746;GENE_003180;GENE_003213;GENE_003530;GENE_003626;GENE_003682;GENE_003687;GENE_003695;GENE_004155;GENE_004302;GENE_004313;GENE_004318;GENE_004353;GENE_004520;GENE_004983;GENE_005184;GENE_005264;GENE_005450;GENE_005781;GENE_006491;GENE_006635;GEN…
306	GO:0016491	MF	oxidoreductase activity	306/ 2880	1813/ 22477	0.168781	1.84197e-07	1.18932e-05	GENE_000211;GENE_000263;GENE_000517;GENE_000524;GENE_000589;GENE_000595;GENE_000868;GENE_000926;GENE_001248;GENE_001315;GENE_001347;GENE_001461;GENE_001678;GENE_001735;GENE_001738;GENE_001743;GENE_001940;GENE_002194;GENE_002371;GENE_002465;GENE_002475;GENE_002484;GENE_002546;GENE_002569;GENE_002578;GENE_002618;GENE_002759;GENE_002813;GENE_002821;GENE_002822;GENE_003434;GENE_003514;GENE_003619;GEN…
103	GO:0020037	MF	heme binding	103/ 2880	487/ 22477	0.211499	2.16073e-07	1.35842e-05	GENE_000524;GENE_000868;GENE_001248;GENE_001315;GENE_001738;GENE_002194;GENE_002475;GENE_002484;GENE_002546;GENE_002569;GENE_002578;GENE_002658;GENE_002813;GENE_002821;GENE_002822;GENE_003514;GENE_003809;GENE_004089;GENE_004557;GENE_004610;GENE_004621;GENE_004678;GENE_004946;GENE_005110;GENE_005863;GENE_005868;GENE_005876;GENE_006394;GENE_006612;GENE_006982;GENE_007184;GENE_007483;GENE_008006;GEN…
44	GO:0030247	MF	polysaccharide binding	44/ 2880	157/ 22477	0.280255	4.03214e-07	2.46994e-05	GENE_000013;GENE_000231;GENE_000237;GENE_000268;GENE_002856;GENE_003284;GENE_003285;GENE_003647;GENE_003745;GENE_004172;GENE_004702;GENE_004708;GENE_004711;GENE_004717;GENE_004835;GENE_005168;GENE_005194;GENE_005664;GENE_007855;GENE_010285;GENE_010674;GENE_014939;GENE_015407;GENE_017322;GENE_017371;GENE_018207;GENE_018208;GENE_018210;GENE_018211;GENE_018212;GENE_018306;GENE_018852;GENE_019289;GEN…
117	GO:0022804	MF	active transmembrane transporter activity	117/ 2880	581/ 22477	0.201377	5.61691e-07	3.3547e-05	GENE_000003;GENE_000248;GENE_000311;GENE_000322;GENE_000588;GENE_000688;GENE_000816;GENE_000987;GENE_001298;GENE_001373;GENE_001541;GENE_001615;GENE_001622;GENE_001893;GENE_001896;GENE_001922;GENE_001973;GENE_001994;GENE_002380;GENE_002406;GENE_002548;GENE_003355;GENE_003488;GENE_003832;GENE_003999;GENE_004452;GENE_004797;GENE_004821;GENE_005141;GENE_005159;GENE_005226;GENE_005328;GENE_005422;GEN…
157	GO:0003700	MF	DNA-binding transcription factor activity	157/ 2880	835/ 22477	0.188024	6.22122e-07	3.625e-05	GENE_000238;GENE_000310;GENE_000361;GENE_000370;GENE_000385;GENE_000468;GENE_000566;GENE_000759;GENE_000831;GENE_000960;GENE_001109;GENE_001165;GENE_001204;GENE_001236;GENE_001508;GENE_001554;GENE_001579;GENE_001716;GENE_002359;GENE_002491;GENE_002528;GENE_002667;GENE_002708;GENE_003072;GENE_003278;GENE_003841;GENE_004220;GENE_004284;GENE_004332;GENE_004726;GENE_005358;GENE_005437;GENE_005542;GEN…
91	GO:0004497	MF	monooxygenase activity	91/ 2880	428/ 22477	0.212617	8.22866e-07	4.68054e-05	GENE_001315;GENE_001678;GENE_001738;GENE_002475;GENE_002484;GENE_002546;GENE_002569;GENE_002578;GENE_002813;GENE_002821;GENE_002822;GENE_003434;GENE_003809;GENE_004089;GENE_004557;GENE_004610;GENE_004621;GENE_004678;GENE_004946;GENE_005110;GENE_006394;GENE_006533;GENE_006982;GENE_007483;GENE_008278;GENE_008501;GENE_009024;GENE_009123;GENE_009271;GENE_009400;GENE_009404;GENE_009562;GENE_009569;GEN…
168	GO:0006952	BP	defense response	168/ 2880	908/ 22477	0.185022	6.15823e-07	5.64864e-05	GENE_000817;GENE_000933;GENE_000992;GENE_001586;GENE_001769;GENE_002054;GENE_002108;GENE_002111;GENE_002114;GENE_002137;GENE_002307;GENE_002467;GENE_002666;GENE_002671;GENE_002678;GENE_002696;GENE_002744;GENE_002746;GENE_002993;GENE_003180;GENE_003213;GENE_003264;GENE_003530;GENE_003626;GENE_003682;GENE_003687;GENE_003695;GENE_004155;GENE_004244;GENE_004302;GENE_004313;GENE_004318;GENE_004353;GEN…
106	GO:0046906	MF	tetrapyrrole binding	106/ 2880	519/ 22477	0.204239	1.01751e-06	5.65311e-05	GENE_000524;GENE_000868;GENE_001248;GENE_001315;GENE_001738;GENE_002194;GENE_002475;GENE_002484;GENE_002546;GENE_002569;GENE_002578;GENE_002658;GENE_002813;GENE_002821;GENE_002822;GENE_003514;GENE_003809;GENE_004089;GENE_004528;GENE_004557;GENE_004610;GENE_004621;GENE_004678;GENE_004946;GENE_005110;GENE_005863;GENE_005868;GENE_005876;GENE_006394;GENE_006612;GENE_006982;GENE_007184;GENE_007483;GEN…
463	GO:0140096	MF	catalytic activity, acting on a protein	463/ 2880	2959/ 22477	0.156472	1.45921e-06	7.90863e-05	GENE_000002;GENE_000013;GENE_000132;GENE_000183;GENE_000204;GENE_000217;GENE_000219;GENE_000231;GENE_000237;GENE_000268;GENE_000273;GENE_000440;GENE_000459;GENE_000494;GENE_000556;GENE_000608;GENE_000635;GENE_000660;GENE_000883;GENE_000928;GENE_000975;GENE_000992;GENE_001060;GENE_001169;GENE_001310;GENE_001388;GENE_001490;GENE_001494;GENE_001518;GENE_001586;GENE_001653;GENE_001712;GENE_001763;GEN…
109	GO:0044419	BP	biological process involved in interspecies interaction between organisms	109/ 2880	539/ 22477	0.202226	1.15778e-06	9.65432e-05	GENE_000933;GENE_000992;GENE_001586;GENE_001769;GENE_002467;GENE_003180;GENE_003213;GENE_003530;GENE_003626;GENE_003682;GENE_003687;GENE_003695;GENE_004155;GENE_004302;GENE_004313;GENE_004318;GENE_004353;GENE_004520;GENE_004983;GENE_005184;GENE_005264;GENE_005450;GENE_005781;GENE_006491;GENE_006635;GENE_006848;GENE_006857;GENE_008790;GENE_009995;GENE_010371;GENE_010697;GENE_011260;GENE_011533;GEN…
107	GO:0043207	BP	response to external biotic stimulus	107/ 2880	534/ 22477	0.200375	2.04566e-06	0.00015011	GENE_000933;GENE_000992;GENE_001586;GENE_001769;GENE_002467;GENE_003180;GENE_003213;GENE_003530;GENE_003626;GENE_003682;GENE_003687;GENE_003695;GENE_004155;GENE_004302;GENE_004313;GENE_004318;GENE_004353;GENE_004520;GENE_004983;GENE_005184;GENE_005264;GENE_005450;GENE_005781;GENE_006491;GENE_006635;GENE_006848;GENE_006857;GENE_008790;GENE_009995;GENE_010371;GENE_010697;GENE_011260;GENE_011533;GEN…
107	GO:0051707	BP	response to other organism	107/ 2880	534/ 22477	0.200375	2.04566e-06	0.00015011	GENE_000933;GENE_000992;GENE_001586;GENE_001769;GENE_002467;GENE_003180;GENE_003213;GENE_003530;GENE_003626;GENE_003682;GENE_003687;GENE_003695;GENE_004155;GENE_004302;GENE_004313;GENE_004318;GENE_004353;GENE_004520;GENE_004983;GENE_005184;GENE_005264;GENE_005450;GENE_005781;GENE_006491;GENE_006635;GENE_006848;GENE_006857;GENE_008790;GENE_009995;GENE_010371;GENE_010697;GENE_011260;GENE_011533;GEN…
101	GO:0005576	CC	extracellular region	101/ 2880	511/ 22477	0.197652	8.67321e-06	0.000329169	GENE_000524;GENE_000635;GENE_001153;GENE_001248;GENE_001287;GENE_001510;GENE_001680;GENE_001698;GENE_001714;GENE_001718;GENE_001775;GENE_002194;GENE_002553;GENE_002634;GENE_003322;GENE_003514;GENE_003945;GENE_003947;GENE_004129;GENE_005021;GENE_005821;GENE_005841;GENE_005868;GENE_005876;GENE_005890;GENE_006142;GENE_006541;GENE_006612;GENE_006652;GENE_007210;GENE_008002;GENE_008560;GENE_008978;GEN…
339	GO:0050896	BP	response to stimulus	339/ 2880	2112/ 22477	0.160511	5.26234e-06	0.000371299	GENE_000524;GENE_000538;GENE_000817;GENE_000868;GENE_000933;GENE_000973;GENE_000992;GENE_001058;GENE_001148;GENE_001153;GENE_001248;GENE_001317;GENE_001403;GENE_001472;GENE_001481;GENE_001586;GENE_001680;GENE_001712;GENE_001763;GENE_001769;GENE_002054;GENE_002108;GENE_002111;GENE_002114;GENE_002129;GENE_002137;GENE_002194;GENE_002307;GENE_002467;GENE_002504;GENE_002666;GENE_002671;GENE_002678;GEN…
40	GO:0140359	MF	ABC-type transporter activity	40/ 2880	154/ 22477	0.25974	8.92295e-06	0.000426339	GENE_000311;GENE_000322;GENE_000688;GENE_001373;GENE_001541;GENE_001893;GENE_001896;GENE_001973;GENE_003832;GENE_005141;GENE_005159;GENE_005226;GENE_005328;GENE_005422;GENE_005432;GENE_005588;GENE_005704;GENE_006468;GENE_006546;GENE_009694;GENE_010131;GENE_014590;GENE_014915;GENE_015466;GENE_015497;GENE_017323;GENE_017339;GENE_017341;GENE_017389;GENE_017406;GENE_017672;GENE_018037;GENE_019417;GEN…
122	GO:0009605	BP	response to external stimulus	122/ 2880	643/ 22477	0.189736	6.55945e-06	0.000437575	GENE_000933;GENE_000992;GENE_001586;GENE_001763;GENE_001769;GENE_002129;GENE_002467;GENE_002839;GENE_002969;GENE_003180;GENE_003213;GENE_003530;GENE_003626;GENE_003682;GENE_003687;GENE_003695;GENE_004155;GENE_004302;GENE_004313;GENE_004318;GENE_004353;GENE_004438;GENE_004520;GENE_004983;GENE_005184;GENE_005264;GENE_005450;GENE_005781;GENE_006491;GENE_006635;GENE_006848;GENE_006857;GENE_008790;GEN…
172	GO:0005886	CC	plasma membrane	172/ 2880	987/ 22477	0.174265	2.14384e-05	0.000742887	GENE_000013;GENE_000101;GENE_000259;GENE_000459;GENE_000484;GENE_000914;GENE_001298;GENE_001370;GENE_001374;GENE_001586;GENE_001769;GENE_001922;GENE_002067;GENE_002159;GENE_002303;GENE_002467;GENE_002958;GENE_003053;GENE_003530;GENE_003658;GENE_003745;GENE_003936;GENE_004090;GENE_004127;GENE_004155;GENE_004199;GENE_004438;GENE_004520;GENE_004540;GENE_004835;GENE_005049;GENE_005540;GENE_006113;GEN…
41	GO:0038023	MF	signaling receptor activity	41/ 2880	163/ 22477	0.251534	1.64794e-05	0.000771946	GENE_000459;GENE_001374;GENE_002666;GENE_002671;GENE_002678;GENE_002696;GENE_002744;GENE_002746;GENE_006169;GENE_006596;GENE_006848;GENE_007987;GENE_008992;GENE_009995;GENE_011347;GENE_011371;GENE_011400;GENE_011533;GENE_011594;GENE_011666;GENE_012358;GENE_012562;GENE_013476;GENE_016920;GENE_018779;GENE_018819;GENE_018853;GENE_019584;GENE_019877;GENE_020311;GENE_020314;GENE_020967;GENE_021295;GEN…
64	GO:0098542	BP	defense response to other organism	64/ 2880	293/ 22477	0.21843	1.40719e-05	0.000875083	GENE_000992;GENE_001586;GENE_001769;GENE_002467;GENE_003180;GENE_003213;GENE_003530;GENE_003682;GENE_003687;GENE_003695;GENE_004155;GENE_004520;GENE_005450;GENE_005781;GENE_006491;GENE_006848;GENE_006857;GENE_008790;GENE_009995;GENE_010371;GENE_011260;GENE_011533;GENE_012171;GENE_013291;GENE_013354;GENE_015420;GENE_016082;GENE_017007;GENE_017073;GENE_017110;GENE_017275;GENE_018060;GENE_018089;GEN…
2386	GO:0003674	MF	molecular_function	2386/ 2880	17966/ 22477	0.132806	2.26251e-05	0.00103945
44	GO:0060089	MF	molecular transducer activity	44/ 2880	180/ 22477	0.244444	2.46928e-05	0.00111304	GENE_000459;GENE_001374;GENE_002666;GENE_002671;GENE_002678;GENE_002696;GENE_002744;GENE_002746;GENE_002859;GENE_006169;GENE_006596;GENE_006848;GENE_007987;GENE_008306;GENE_008992;GENE_009995;GENE_011347;GENE_011371;GENE_011400;GENE_011533;GENE_011594;GENE_011666;GENE_012358;GENE_012562;GENE_013476;GENE_016920;GENE_018779;GENE_018819;GENE_018853;GENE_019584;GENE_019877;GENE_020311;GENE_020314;GEN…
31	GO:0016298	MF	lipase activity	31/ 2880	113/ 22477	0.274336	2.75323e-05	0.00121805	GENE_001790;GENE_001792;GENE_002067;GENE_002159;GENE_002410;GENE_004133;GENE_004553;GENE_004993;GENE_006160;GENE_006888;GENE_008947;GENE_008968;GENE_009878;GENE_009899;GENE_009959;GENE_010121;GENE_012928;GENE_012933;GENE_013078;GENE_013474;GENE_013503;GENE_018072;GENE_019022;GENE_020323;GENE_020386;GENE_020771;GENE_021270;GENE_022508;GENE_023526;GENE_024577;GENE_025272
9	GO:0042537	BP	benzene-containing compound metabolic process	9/ 2880	15/ 22477	0.6	2.21977e-05	0.00129275	GENE_002273;GENE_002330;GENE_007956;GENE_008006;GENE_011773;GENE_016727;GENE_018910;GENE_024929;GENE_025865
109	GO:0043565	MF	sequence-specific DNA binding	109/ 2880	582/ 22477	0.187285	4.07873e-05	0.00177165	GENE_000238;GENE_000361;GENE_000370;GENE_000385;GENE_000468;GENE_000566;GENE_000759;GENE_000831;GENE_001204;GENE_001236;GENE_001508;GENE_001778;GENE_002073;GENE_002359;GENE_002491;GENE_002708;GENE_003072;GENE_004284;GENE_004332;GENE_004726;GENE_005358;GENE_005437;GENE_005542;GENE_005616;GENE_006303;GENE_006621;GENE_007000;GENE_007024;GENE_007124;GENE_007145;GENE_007731;GENE_007938;GENE_008009;GEN…
93	GO:0016705	MF	oxidoreductase activity, acting on paired donors, with incorporation or reduction of molecular oxygen	93/ 2880	480/ 22477	0.19375	4.19685e-05	0.00179041	GENE_001315;GENE_001678;GENE_001738;GENE_002371;GENE_002475;GENE_002484;GENE_002546;GENE_002569;GENE_002578;GENE_002759;GENE_002813;GENE_002821;GENE_002822;GENE_003809;GENE_004089;GENE_004557;GENE_004610;GENE_004621;GENE_004678;GENE_004946;GENE_005110;GENE_006394;GENE_006533;GENE_006982;GENE_007474;GENE_007483;GENE_007864;GENE_007968;GENE_008278;GENE_008468;GENE_008501;GENE_009024;GENE_009123;GEN…
1235	GO:0016020	CC	membrane	1235/ 2880	8878/ 22477	0.139108	7.47184e-05	0.00229041	GENE_000002;GENE_000003;GENE_000013;GENE_000020;GENE_000101;GENE_000132;GENE_000133;GENE_000141;GENE_000183;GENE_000195;GENE_000204;GENE_000231;GENE_000237;GENE_000248;GENE_000259;GENE_000265;GENE_000268;GENE_000273;GENE_000310;GENE_000311;GENE_000322;GENE_000380;GENE_000405;GENE_000415;GENE_000435;GENE_000437;GENE_000440;GENE_000459;GENE_000467;GENE_000484;GENE_000493;GENE_000528;GENE_000577;GEN…
26	GO:0071949	MF	FAD binding	26/ 2880	92/ 22477	0.282609	6.51992e-05	0.00268553	GENE_003434;GENE_004105;GENE_004220;GENE_006622;GENE_010223;GENE_012237;GENE_016215;GENE_016258;GENE_016284;GENE_016296;GENE_020439;GENE_021437;GENE_021487;GENE_021532;GENE_022698;GENE_024225;GENE_024470;GENE_024620;GENE_024639;GENE_024640;GENE_024658;GENE_024924;GENE_025639;GENE_025829;GENE_026255;GENE_026291
93	GO:0016798	MF	hydrolase activity, acting on glycosyl bonds	93/ 2880	490/ 22477	0.189796	9.08409e-05	0.00367829	GENE_000365;GENE_000978;GENE_001287;GENE_001401;GENE_001698;GENE_001718;GENE_001733;GENE_001775;GENE_002248;GENE_002604;GENE_002623;GENE_002737;GENE_002867;GENE_002993;GENE_003757;GENE_004938;GENE_005157;GENE_005888;GENE_005897;GENE_005904;GENE_005925;GENE_005939;GENE_005942;GENE_005943;GENE_006142;GENE_006652;GENE_006933;GENE_007210;GENE_008884;GENE_009202;GENE_009646;GENE_009661;GENE_009674;GEN…
64	GO:0015291	MF	secondary active transmembrane transporter activity	64/ 2880	310/ 22477	0.206452	0.000103763	0.00406376	GENE_000248;GENE_000588;GENE_000816;GENE_000987;GENE_001922;GENE_001994;GENE_002380;GENE_002406;GENE_002548;GENE_003355;GENE_003488;GENE_004452;GENE_004821;GENE_005521;GENE_005534;GENE_006708;GENE_007271;GENE_007656;GENE_008293;GENE_008522;GENE_009360;GENE_009455;GENE_009848;GENE_009944;GENE_010140;GENE_011478;GENE_011744;GENE_012095;GENE_012293;GENE_012532;GENE_013334;GENE_014305;GENE_014659;GEN…
70	GO:0009755	BP	hormone-mediated signaling pathway	70/ 2880	344/ 22477	0.203488	8.40693e-05	0.00453603	GENE_000259;GENE_000588;GENE_000816;GENE_000987;GENE_001109;GENE_001185;GENE_001714;GENE_001919;GENE_001921;GENE_002548;GENE_002666;GENE_002667;GENE_002671;GENE_002678;GENE_002696;GENE_002744;GENE_002746;GENE_003278;GENE_004199;GENE_005534;GENE_006169;GENE_006708;GENE_007023;GENE_007271;GENE_007816;GENE_007987;GENE_008131;GENE_008306;GENE_008522;GENE_008635;GENE_008717;GENE_008832;GENE_010101;GEN…
11	GO:0004675	MF	transmembrane receptor protein serine/threonine kinase activity	11/ 2880	25/ 22477	0.44	0.000118592	0.00456962	GENE_006848;GENE_009995;GENE_018779;GENE_018819;GENE_018853;GENE_019584;GENE_020311;GENE_020314;GENE_023125;GENE_023277;GENE_023314
85	GO:0004553	MF	hydrolase activity, hydrolyzing O-glycosyl compounds	85/ 2880	444/ 22477	0.191441	0.000133721	0.00507078	GENE_000365;GENE_001287;GENE_001401;GENE_001698;GENE_001718;GENE_001733;GENE_001775;GENE_002604;GENE_002623;GENE_002737;GENE_002867;GENE_002993;GENE_003757;GENE_005157;GENE_005888;GENE_005897;GENE_005904;GENE_005925;GENE_005939;GENE_005942;GENE_005943;GENE_006142;GENE_006652;GENE_006933;GENE_007210;GENE_008884;GENE_009202;GENE_009646;GENE_009661;GENE_009674;GENE_009717;GENE_010150;GENE_010640;GEN…
7	GO:0008219	BP	cell death	7/ 2880	11/ 22477	0.636364	0.000115844	0.00582237	GENE_003213;GENE_011260;GENE_015520;GENE_016082;GENE_017275;GENE_020712;GENE_021104
7	GO:0012501	BP	programmed cell death	7/ 2880	11/ 22477	0.636364	0.000115844	0.00582237	GENE_003213;GENE_011260;GENE_015520;GENE_016082;GENE_017275;GENE_020712;GENE_021104
39	GO:0050660	MF	flavin adenine dinucleotide binding	39/ 2880	167/ 22477	0.233533	0.000164521	0.00614127	GENE_000589;GENE_001678;GENE_003434;GENE_004105;GENE_004220;GENE_004301;GENE_006533;GENE_006622;GENE_006862;GENE_008278;GENE_009115;GENE_009569;GENE_010223;GENE_012237;GENE_014365;GENE_016215;GENE_016258;GENE_016284;GENE_016296;GENE_016668;GENE_020439;GENE_020738;GENE_021331;GENE_021437;GENE_021487;GENE_021532;GENE_022698;GENE_022789;GENE_024225;GENE_024470;GENE_024620;GENE_024639;GENE_024640;GEN…
162	GO:0140110	MF	transcription regulator activity	162/ 2880	957/ 22477	0.169279	0.000167994	0.00617444	GENE_000238;GENE_000310;GENE_000361;GENE_000370;GENE_000385;GENE_000468;GENE_000566;GENE_000759;GENE_000831;GENE_000960;GENE_001109;GENE_001165;GENE_001204;GENE_001236;GENE_001460;GENE_001508;GENE_001554;GENE_001579;GENE_001716;GENE_002359;GENE_002491;GENE_002528;GENE_002667;GENE_002708;GENE_003072;GENE_003278;GENE_003841;GENE_004220;GENE_004284;GENE_004332;GENE_004726;GENE_005358;GENE_005437;GEN…
37	GO:0044282	BP	small molecule catabolic process	37/ 2880	153/ 22477	0.24183	0.000128029	0.0063478	GENE_001735;GENE_002273;GENE_002330;GENE_002759;GENE_003406;GENE_003619;GENE_003968;GENE_004105;GENE_005003;GENE_005509;GENE_006338;GENE_007397;GENE_007617;GENE_008006;GENE_008312;GENE_011773;GENE_012237;GENE_013222;GENE_014757;GENE_015663;GENE_015811;GENE_015875;GENE_015881;GENE_016727;GENE_018323;GENE_020322;GENE_020593;GENE_021487;GENE_021532;GENE_022201;GENE_023616;GENE_024521;GENE_025106;GEN…
15	GO:0004568	MF	chitinase activity	15/ 2880	43/ 22477	0.348837	0.000175966	0.00636944	GENE_002993;GENE_009661;GENE_009674;GENE_013416;GENE_013432;GENE_018800;GENE_018821;GENE_018829;GENE_018921;GENE_024257;GENE_025162;GENE_025165;GENE_025186;GENE_025204;GENE_025241
16	GO:0006817	BP	phosphate ion transport	16/ 2880	47/ 22477	0.340426	0.000150083	0.00715137	GENE_002061;GENE_004821;GENE_007269;GENE_011744;GENE_012293;GENE_015520;GENE_016493;GENE_016641;GENE_016651;GENE_016736;GENE_016821;GENE_021434;GENE_022268;GENE_023078;GENE_024246;GENE_024800
5	GO:0009626	BP	plant-type hypersensitive response	5/ 2880	6/ 22477	0.833333	0.000184563	0.00846454	GENE_003213;GENE_011260;GENE_016082;GENE_017275;GENE_021104
5	GO:0051702	BP	biological process involved in interaction with symbiont	5/ 2880	6/ 22477	0.833333	0.000184563	0.00846454	GENE_003213;GENE_011260;GENE_016082;GENE_017275;GENE_021104
5	GO:0034050	BP	programmed cell death induced by symbiont	5/ 2880	6/ 22477	0.833333	0.000184563	0.00846454	GENE_003213;GENE_011260;GENE_016082;GENE_017275;GENE_021104
1073	GO:0043167	MF	ion binding	1073/ 2880	7691/ 22477	0.139514	0.000251995	0.00885318	GENE_000002;GENE_000003;GENE_000013;GENE_000101;GENE_000132;GENE_000183;GENE_000204;GENE_000211;GENE_000217;GENE_000219;GENE_000231;GENE_000237;GENE_000263;GENE_000268;GENE_000273;GENE_000311;GENE_000322;GENE_000338;GENE_000343;GENE_000432;GENE_000440;GENE_000459;GENE_000486;GENE_000524;GENE_000544;GENE_000556;GENE_000589;GENE_000614;GENE_000659;GENE_000688;GENE_000752;GENE_000780;GENE_000819;GEN…
36	GO:0009620	BP	response to fungus	36/ 2880	151/ 22477	0.238411	0.000196493	0.00885933	GENE_000992;GENE_002467;GENE_003180;GENE_003682;GENE_003687;GENE_003695;GENE_004155;GENE_004520;GENE_006857;GENE_008790;GENE_014817;GENE_014941;GENE_015420;GENE_015547;GENE_017007;GENE_017110;GENE_018060;GENE_018089;GENE_018135;GENE_018171;GENE_018793;GENE_018800;GENE_018821;GENE_018829;GENE_018921;GENE_019069;GENE_020032;GENE_020427;GENE_021005;GENE_021498;GENE_023608;GENE_023609;GENE_024206;GEN…
82	GO:0005506	MF	iron ion binding	82/ 2880	435/ 22477	0.188506	0.000280262	0.00970356	GENE_001315;GENE_001738;GENE_002475;GENE_002484;GENE_002546;GENE_002569;GENE_002578;GENE_002813;GENE_002821;GENE_002822;GENE_003809;GENE_004089;GENE_004557;GENE_004610;GENE_004621;GENE_004678;GENE_004946;GENE_005110;GENE_006394;GENE_006982;GENE_007483;GENE_008501;GENE_009024;GENE_009123;GENE_009271;GENE_009400;GENE_009404;GENE_009562;GENE_010278;GENE_010406;GENE_012336;GENE_012431;GENE_012735;GEN…
18	GO:0006749	BP	glutathione metabolic process	18/ 2880	58/ 22477	0.310345	0.000226387	0.0100074	GENE_001472;GENE_002991;GENE_003031;GENE_003180;GENE_004301;GENE_006933;GENE_006982;GENE_008526;GENE_008583;GENE_008623;GENE_008632;GENE_010867;GENE_015267;GENE_015288;GENE_015303;GENE_015333;GENE_016491;GENE_026325
7	GO:0044403	BP	biological process involved in symbiotic interaction	7/ 2880	12/ 22477	0.583333	0.000247174	0.0106381	GENE_003213;GENE_011260;GENE_011623;GENE_016082;GENE_016545;GENE_017275;GENE_021104
16	GO:0004620	MF	phospholipase activity	16/ 2880	50/ 22477	0.32	0.000337415	0.011482	GENE_001790;GENE_002067;GENE_002159;GENE_002410;GENE_004993;GENE_006160;GENE_008947;GENE_010121;GENE_013078;GENE_013474;GENE_013503;GENE_018072;GENE_020323;GENE_021270;GENE_023526;GENE_025272
51	GO:0042626	MF	ATPase-coupled transmembrane transporter activity	51/ 2880	244/ 22477	0.209016	0.00034124	0.011482	GENE_000003;GENE_000311;GENE_000322;GENE_000688;GENE_001298;GENE_001373;GENE_001541;GENE_001615;GENE_001622;GENE_001893;GENE_001896;GENE_001973;GENE_003832;GENE_003999;GENE_004797;GENE_005141;GENE_005159;GENE_005226;GENE_005328;GENE_005422;GENE_005432;GENE_005588;GENE_005704;GENE_006468;GENE_006546;GENE_009694;GENE_010131;GENE_010869;GENE_013351;GENE_014590;GENE_014915;GENE_014929;GENE_015466;GEN…
20	GO:1901136	BP	carbohydrate derivative catabolic process	20/ 2880	67/ 22477	0.298507	0.000288732	0.0120381	GENE_000614;GENE_002993;GENE_007617;GENE_009501;GENE_011477;GENE_013416;GENE_013432;GENE_013516;GENE_015811;GENE_018800;GENE_018821;GENE_018829;GENE_018921;GENE_024257;GENE_024821;GENE_025162;GENE_025165;GENE_025186;GENE_025204;GENE_025241
27	GO:0008514	MF	organic anion transmembrane transporter activity	27/ 2880	106/ 22477	0.254717	0.000367847	0.0122054	GENE_000133;GENE_000588;GENE_000987;GENE_001994;GENE_002548;GENE_004452;GENE_004821;GENE_005003;GENE_005521;GENE_005534;GENE_006320;GENE_006637;GENE_006708;GENE_007271;GENE_008522;GENE_011478;GENE_012532;GENE_013334;GENE_015697;GENE_016949;GENE_017991;GENE_019006;GENE_020874;GENE_022268;GENE_022735;GENE_023467;GENE_026210
23	GO:0046943	MF	carboxylic acid transmembrane transporter activity	23/ 2880	84/ 22477	0.27381	0.000398794	0.012801	GENE_000133;GENE_000588;GENE_000987;GENE_002548;GENE_004452;GENE_004821;GENE_005521;GENE_005534;GENE_006320;GENE_006637;GENE_006708;GENE_007271;GENE_008522;GENE_011478;GENE_012532;GENE_013334;GENE_015697;GENE_016949;GENE_019006;GENE_020874;GENE_022268;GENE_023467;GENE_026210
23	GO:0005342	MF	organic acid transmembrane transporter activity	23/ 2880	84/ 22477	0.27381	0.000398794	0.012801	GENE_000133;GENE_000588;GENE_000987;GENE_002548;GENE_004452;GENE_004821;GENE_005521;GENE_005534;GENE_006320;GENE_006637;GENE_006708;GENE_007271;GENE_008522;GENE_011478;GENE_012532;GENE_013334;GENE_015697;GENE_016949;GENE_019006;GENE_020874;GENE_022268;GENE_023467;GENE_026210
14	GO:1901071	BP	glucosamine-containing compound metabolic process	14/ 2880	41/ 22477	0.341463	0.000370488	0.0152732	GENE_002993;GENE_013416;GENE_013432;GENE_013585;GENE_018800;GENE_018821;GENE_018829;GENE_018921;GENE_024257;GENE_025162;GENE_025165;GENE_025186;GENE_025204;GENE_025241
171	GO:0007165	BP	signal transduction	171/ 2880	1035/ 22477	0.165217	0.00041558	0.0168236	GENE_000013;GENE_000259;GENE_000588;GENE_000816;GENE_000987;GENE_001109;GENE_001185;GENE_001712;GENE_001714;GENE_001919;GENE_001921;GENE_002054;GENE_002067;GENE_002108;GENE_002111;GENE_002114;GENE_002137;GENE_002159;GENE_002548;GENE_002553;GENE_002666;GENE_002667;GENE_002671;GENE_002678;GENE_002696;GENE_002744;GENE_002746;GENE_002874;GENE_003264;GENE_003278;GENE_003411;GENE_003745;GENE_004199;GEN…
5	GO:0102682	MF	N6-(Delta2-isopentenyl)-adenosine 5'-monophosphate phosphoribohydrolase activity	5/ 2880	7/ 22477	0.714286	0.000577334	0.0174589	GENE_000978;GENE_002248;GENE_017953;GENE_021418;GENE_024440
13	GO:0006032	BP	chitin catabolic process	13/ 2880	38/ 22477	0.342105	0.000583731	0.0223095	GENE_002993;GENE_013416;GENE_013432;GENE_018800;GENE_018821;GENE_018829;GENE_018921;GENE_024257;GENE_025162;GENE_025165;GENE_025186;GENE_025204;GENE_025241
13	GO:0046348	BP	amino sugar catabolic process	13/ 2880	38/ 22477	0.342105	0.000583731	0.0223095	GENE_002993;GENE_013416;GENE_013432;GENE_018800;GENE_018821;GENE_018829;GENE_018921;GENE_024257;GENE_025162;GENE_025165;GENE_025186;GENE_025204;GENE_025241
13	GO:0006030	BP	chitin metabolic process	13/ 2880	38/ 22477	0.342105	0.000583731	0.0223095	GENE_002993;GENE_013416;GENE_013432;GENE_018800;GENE_018821;GENE_018829;GENE_018921;GENE_024257;GENE_025162;GENE_025165;GENE_025186;GENE_025204;GENE_025241
13	GO:0006026	BP	aminoglycan catabolic process	13/ 2880	38/ 22477	0.342105	0.000583731	0.0223095	GENE_002993;GENE_013416;GENE_013432;GENE_018800;GENE_018821;GENE_018829;GENE_018921;GENE_024257;GENE_025162;GENE_025165;GENE_025186;GENE_025204;GENE_025241
13	GO:1901072	BP	glucosamine-containing compound catabolic process	13/ 2880	38/ 22477	0.342105	0.000583731	0.0223095	GENE_002993;GENE_013416;GENE_013432;GENE_018800;GENE_018821;GENE_018829;GENE_018921;GENE_024257;GENE_025162;GENE_025165;GENE_025186;GENE_025204;GENE_025241
10	GO:1901657	BP	glycosyl compound metabolic process	10/ 2880	25/ 22477	0.4	0.000613325	0.0229621	GENE_003180;GENE_006877;GENE_006905;GENE_007617;GENE_008343;GENE_008758;GENE_009594;GENE_015811;GENE_016830;GENE_024821
11	GO:0043178	MF	alcohol binding	11/ 2880	30/ 22477	0.366667	0.000788364	0.0229683	GENE_002666;GENE_002671;GENE_002678;GENE_002696;GENE_002744;GENE_002746;GENE_006169;GENE_007987;GENE_012358;GENE_013942;GENE_016821
14	GO:0006022	BP	aminoglycan metabolic process	14/ 2880	43/ 22477	0.325581	0.000642794	0.0238223	GENE_002993;GENE_012120;GENE_013416;GENE_013432;GENE_018800;GENE_018821;GENE_018829;GENE_018921;GENE_024257;GENE_025162;GENE_025165;GENE_025186;GENE_025204;GENE_025241
16	GO:1905039	BP	carboxylic acid transmembrane transport	16/ 2880	54/ 22477	0.296296	0.000876472	0.0312211	GENE_000588;GENE_000987;GENE_002548;GENE_004821;GENE_005534;GENE_006637;GENE_006708;GENE_007271;GENE_008522;GENE_012532;GENE_013334;GENE_016949;GENE_019006;GENE_020874;GENE_022268;GENE_026210
16	GO:1903825	BP	organic acid transmembrane transport	16/ 2880	54/ 22477	0.296296	0.000876472	0.0312211	GENE_000588;GENE_000987;GENE_002548;GENE_004821;GENE_005534;GENE_006637;GENE_006708;GENE_007271;GENE_008522;GENE_012532;GENE_013334;GENE_016949;GENE_019006;GENE_020874;GENE_022268;GENE_026210
6	GO:0046912	MF	acyltransferase activity, acyl groups converted into alkyl on transfer	6/ 2880	11/ 22477	0.545455	0.00114244	0.0324916	GENE_002627;GENE_004603;GENE_009333;GENE_012085;GENE_017968;GENE_024949
8	GO:0009116	BP	nucleoside metabolic process	8/ 2880	18/ 22477	0.444444	0.000952688	0.0336097	GENE_006877;GENE_006905;GENE_007617;GENE_008343;GENE_008758;GENE_009594;GENE_015811;GENE_016830
17	GO:0015698	BP	inorganic anion transport	17/ 2880	58/ 22477	0.293103	0.00105021	0.0360115	GENE_002061;GENE_004821;GENE_007269;GENE_008206;GENE_011744;GENE_012293;GENE_015520;GENE_016493;GENE_016641;GENE_016651;GENE_016736;GENE_016821;GENE_021434;GENE_022268;GENE_023078;GENE_024246;GENE_024800
144	GO:0006629	BP	lipid metabolic process	144/ 2880	868/ 22477	0.165899	0.00107698	0.0362519	GENE_000141;GENE_000415;GENE_000780;GENE_000817;GENE_000868;GENE_001156;GENE_001556;GENE_001608;GENE_001678;GENE_001790;GENE_002067;GENE_002159;GENE_002410;GENE_002627;GENE_002658;GENE_002759;GENE_003733;GENE_003953;GENE_004414;GENE_004553;GENE_004993;GENE_005003;GENE_005088;GENE_005414;GENE_005480;GENE_005564;GENE_005636;GENE_005675;GENE_005802;GENE_005898;GENE_005916;GENE_006160;GENE_006533;GEN…
6	GO:2000031	BP	regulation of salicylic acid mediated signaling pathway	6/ 2880	11/ 22477	0.545455	0.00114244	0.0381057	GENE_003213;GENE_011260;GENE_015520;GENE_016082;GENE_017275;GENE_021104
4	GO:0009803	BP	cinnamic acid metabolic process	4/ 2880	5/ 22477	0.8	0.00120751	0.0395566	GENE_002273;GENE_002330;GENE_016727;GENE_025865
4	GO:0009800	BP	cinnamic acid biosynthetic process	4/ 2880	5/ 22477	0.8	0.00120751	0.0395566	GENE_002273;GENE_002330;GENE_016727;GENE_025865
12	GO:0016998	BP	cell wall macromolecule catabolic process	12/ 2880	36/ 22477	0.333333	0.0012232	0.0397161	GENE_002993;GENE_012209;GENE_018800;GENE_018821;GENE_018829;GENE_018921;GENE_024257;GENE_025162;GENE_025165;GENE_025186;GENE_025204;GENE_025241
30	GO:0050832	BP	defense response to fungus	30/ 2880	129/ 22477	0.232558	0.00128015	0.0412006	GENE_000992;GENE_002467;GENE_003180;GENE_003682;GENE_003687;GENE_003695;GENE_004155;GENE_004520;GENE_006857;GENE_008790;GENE_015420;GENE_017007;GENE_017110;GENE_018060;GENE_018089;GENE_018135;GENE_018171;GENE_018800;GENE_018821;GENE_018829;GENE_018921;GENE_019069;GENE_020032;GENE_020427;GENE_021005;GENE_021498;GENE_023608;GENE_023609;GENE_024206;GENE_024257
70	GO:0042221	BP	response to chemical	70/ 2880	376/ 22477	0.18617	0.00134574	0.0427584	GENE_001058;GENE_001148;GENE_001472;GENE_001481;GENE_001586;GENE_001712;GENE_001769;GENE_003180;GENE_003628;GENE_004002;GENE_004124;GENE_004590;GENE_004612;GENE_006652;GENE_006982;GENE_008112;GENE_008526;GENE_008583;GENE_008623;GENE_008632;GENE_008664;GENE_008896;GENE_009035;GENE_009081;GENE_009450;GENE_009661;GENE_009674;GENE_010867;GENE_010917;GENE_011623;GENE_012019;GENE_012582;GENE_012987;GEN…
34	GO:0009734	BP	auxin-activated signaling pathway	34/ 2880	153/ 22477	0.222222	0.00139115	0.0427584	GENE_000259;GENE_000588;GENE_000816;GENE_000987;GENE_001185;GENE_001919;GENE_001921;GENE_002548;GENE_005534;GENE_006708;GENE_007023;GENE_007271;GENE_007816;GENE_008522;GENE_008717;GENE_008832;GENE_010101;GENE_010184;GENE_011379;GENE_011398;GENE_012532;GENE_013334;GENE_013647;GENE_016537;GENE_016616;GENE_016949;GENE_019006;GENE_020270;GENE_020874;GENE_020903;GENE_020942;GENE_026016;GENE_026210;GEN…
28	GO:0046395	BP	carboxylic acid catabolic process	28/ 2880	120/ 22477	0.233333	0.00141002	0.0427584	GENE_001735;GENE_002273;GENE_002330;GENE_002759;GENE_003406;GENE_003968;GENE_004105;GENE_005003;GENE_006338;GENE_007397;GENE_008006;GENE_008312;GENE_011773;GENE_012237;GENE_013222;GENE_015663;GENE_015875;GENE_015881;GENE_016727;GENE_018323;GENE_020593;GENE_021487;GENE_021532;GENE_022201;GENE_023616;GENE_025106;GENE_025384;GENE_025865
28	GO:0016054	BP	organic acid catabolic process	28/ 2880	120/ 22477	0.233333	0.00141002	0.0427584	GENE_001735;GENE_002273;GENE_002330;GENE_002759;GENE_003406;GENE_003968;GENE_004105;GENE_005003;GENE_006338;GENE_007397;GENE_008006;GENE_008312;GENE_011773;GENE_012237;GENE_013222;GENE_015663;GENE_015875;GENE_015881;GENE_016727;GENE_018323;GENE_020593;GENE_021487;GENE_021532;GENE_022201;GENE_023616;GENE_025106;GENE_025384;GENE_025865
17	GO:0009617	BP	response to bacterium	17/ 2880	61/ 22477	0.278689	0.00154098	0.0459662	GENE_003180;GENE_003530;GENE_006848;GENE_008790;GENE_009995;GENE_015795;GENE_018779;GENE_018819;GENE_018853;GENE_019584;GENE_020311;GENE_020314;GENE_023028;GENE_023125;GENE_023277;GENE_023314;GENE_023368
53	GO:0015399	MF	primary active transmembrane transporter activity	53/ 2880	271/ 22477	0.195572	0.00174958	0.0469635	GENE_000003;GENE_000311;GENE_000322;GENE_000688;GENE_001298;GENE_001373;GENE_001541;GENE_001615;GENE_001622;GENE_001893;GENE_001896;GENE_001973;GENE_003832;GENE_003999;GENE_004797;GENE_005141;GENE_005159;GENE_005226;GENE_005328;GENE_005422;GENE_005432;GENE_005588;GENE_005704;GENE_006468;GENE_006546;GENE_009694;GENE_010131;GENE_010869;GENE_013351;GENE_014590;GENE_014915;GENE_014929;GENE_015034;GEN…
33	GO:0048046	CC	apoplast	33/ 2880	150/ 22477	0.22	0.00191892	0.0477931	GENE_001698;GENE_001775;GENE_005821;GENE_005841;GENE_005890;GENE_006142;GENE_006652;GENE_007210;GENE_008560;GENE_010640;GENE_010730;GENE_011816;GENE_011845;GENE_012066;GENE_013085;GENE_013291;GENE_013534;GENE_016134;GENE_016140;GENE_016163;GENE_017909;GENE_018351;GENE_018640;GENE_018710;GENE_018858;GENE_018870;GENE_019050;GENE_020274;GENE_023804;GENE_023818;GENE_024040;GENE_024109;GENE_024209
12	GO:0033293	MF	monocarboxylic acid binding	12/ 2880	38/ 22477	0.315789	0.0020716	0.0549896	GENE_002666;GENE_002671;GENE_002678;GENE_002696;GENE_002744;GENE_002746;GENE_006169;GENE_007987;GENE_010371;GENE_012237;GENE_012358;GENE_020414
3	GO:0050113	MF	inositol oxygenase activity	3/ 2880	3/ 22477	1	0.00210169	0.055175	GENE_020322;GENE_025526;GENE_025697
24	GO:0015293	MF	symporter activity	24/ 2880	100/ 22477	0.24	0.00225565	0.0578613	GENE_000588;GENE_000816;GENE_000987;GENE_002548;GENE_003355;GENE_005534;GENE_006708;GENE_007271;GENE_008293;GENE_008522;GENE_009360;GENE_012532;GENE_013334;GENE_016949;GENE_017518;GENE_019006;GENE_020874;GENE_021434;GENE_022353;GENE_022611;GENE_024058;GENE_024069;GENE_026210;GENE_026220
15	GO:0015171	MF	amino acid transmembrane transporter activity	15/ 2880	51/ 22477	0.294118	0.00227667	0.0578613	GENE_000133;GENE_000588;GENE_000987;GENE_002548;GENE_005534;GENE_006708;GENE_007271;GENE_008522;GENE_012532;GENE_013334;GENE_015697;GENE_016949;GENE_019006;GENE_020874;GENE_026210
19	GO:0009308	BP	amine metabolic process	19/ 2880	72/ 22477	0.263889	0.00202419	0.0593864	GENE_000978;GENE_002248;GENE_004700;GENE_005531;GENE_008006;GENE_009081;GENE_013007;GENE_017863;GENE_017953;GENE_019596;GENE_021418;GENE_022172;GENE_022585;GENE_022698;GENE_022807;GENE_024440;GENE_025520;GENE_025639;GENE_025829
6	GO:0006536	BP	glutamate metabolic process	6/ 2880	12/ 22477	0.5	0.00203771	0.0593864	GENE_001735;GENE_003968;GENE_004105;GENE_007397;GENE_021331;GENE_025384
3	GO:0019310	BP	inositol catabolic process	3/ 2880	3/ 22477	1	0.00210169	0.0599308	GENE_020322;GENE_025526;GENE_025697
13	GO:0003333	BP	amino acid transmembrane transport	13/ 2880	43/ 22477	0.302326	0.00212969	0.0601065	GENE_000588;GENE_000987;GENE_002548;GENE_005534;GENE_006708;GENE_007271;GENE_008522;GENE_012532;GENE_013334;GENE_016949;GENE_019006;GENE_020874;GENE_026210
254	GO:0006950	BP	response to stress	254/ 2880	1662/ 22477	0.152828	0.00226213	0.0633568	GENE_000524;GENE_000538;GENE_000817;GENE_000868;GENE_000933;GENE_000973;GENE_000992;GENE_001058;GENE_001248;GENE_001317;GENE_001586;GENE_001769;GENE_002054;GENE_002108;GENE_002111;GENE_002114;GENE_002137;GENE_002194;GENE_002307;GENE_002467;GENE_002504;GENE_002666;GENE_002671;GENE_002678;GENE_002696;GENE_002729;GENE_002744;GENE_002746;GENE_002839;GENE_002993;GENE_003180;GENE_003213;GENE_003264;GEN…
9	GO:0015605	MF	organophosphate ester transmembrane transporter activity	9/ 2880	25/ 22477	0.36	0.00272232	0.0648801	GENE_001994;GENE_004452;GENE_005003;GENE_005521;GENE_006637;GENE_011478;GENE_017991;GENE_022735;GENE_025100
9	GO:0010427	MF	abscisic acid binding	9/ 2880	25/ 22477	0.36	0.00272232	0.0648801	GENE_002666;GENE_002671;GENE_002678;GENE_002696;GENE_002744;GENE_002746;GENE_006169;GENE_007987;GENE_012358
5	GO:0140326	MF	ATPase-coupled intramembrane lipid transporter activity	5/ 2880	9/ 22477	0.555556	0.00277043	0.0648877	GENE_000101;GENE_002958;GENE_002968;GENE_003658;GENE_020531
10	GO:0016762	MF	xyloglucan:xyloglucosyl transferase activity	10/ 2880	30/ 22477	0.333333	0.00308315	0.0707151	GENE_001698;GENE_001775;GENE_006142;GENE_006652;GENE_007210;GENE_010640;GENE_011845;GENE_013534;GENE_016163;GENE_018351
8	GO:0016638	MF	oxidoreductase activity, acting on the CH-NH2 group of donors	8/ 2880	21/ 22477	0.380952	0.00310803	0.0707151	GENE_000595;GENE_001735;GENE_009081;GENE_014495;GENE_019596;GENE_021331;GENE_022585;GENE_025106
4	GO:0080030	MF	methyl indole-3-acetate esterase activity	4/ 2880	6/ 22477	0.666667	0.00325339	0.0719663	GENE_007956;GENE_018780;GENE_018910;GENE_024929
4	GO:0080032	MF	methyl jasmonate esterase activity	4/ 2880	6/ 22477	0.666667	0.00325339	0.0719663	GENE_007956;GENE_018780;GENE_018910;GENE_024929
4	GO:0045548	MF	phenylalanine ammonia-lyase activity	4/ 2880	6/ 22477	0.666667	0.00325339	0.0719663	GENE_002273;GENE_002330;GENE_016727;GENE_025865
7	GO:0033612	MF	receptor serine/threonine kinase binding	7/ 2880	17/ 22477	0.411765	0.00338482	0.0737529	GENE_000183;GENE_000928;GENE_010980;GENE_011564;GENE_012409;GENE_022743;GENE_024922
10	GO:0015748	BP	organophosphate ester transport	10/ 2880	30/ 22477	0.333333	0.00308315	0.0832363	GENE_000101;GENE_002958;GENE_002968;GENE_003658;GENE_005003;GENE_006637;GENE_007969;GENE_017991;GENE_020531;GENE_022735
8	GO:0015833	BP	peptide transport	8/ 2880	21/ 22477	0.380952	0.00310803	0.0832363	GENE_002061;GENE_008188;GENE_010055;GENE_016325;GENE_024904;GENE_025064;GENE_025382;GENE_025430
8	GO:0006857	BP	oligopeptide transport	8/ 2880	21/ 22477	0.380952	0.00310803	0.0832363	GENE_002061;GENE_008188;GENE_010055;GENE_016325;GENE_024904;GENE_025064;GENE_025382;GENE_025430
4	GO:0006020	BP	inositol metabolic process	4/ 2880	6/ 22477	0.666667	0.00325339	0.0846575	GENE_003953;GENE_020322;GENE_025526;GENE_025697
4	GO:0006538	BP	glutamate catabolic process	4/ 2880	6/ 22477	0.666667	0.00325339	0.0846575	GENE_001735;GENE_003968;GENE_007397;GENE_025384
6	GO:0072523	BP	purine-containing compound catabolic process	6/ 2880	13/ 22477	0.461538	0.00337612	0.0872322	GENE_000614;GENE_003619;GENE_007617;GENE_011477;GENE_013516;GENE_015811
31	GO:0016765	MF	transferase activity, transferring alkyl or aryl (other than methyl) groups	31/ 2880	147/ 22477	0.210884	0.00426549	0.0893881	GENE_000338;GENE_001146;GENE_001253;GENE_001472;GENE_002862;GENE_004700;GENE_005564;GENE_006982;GENE_007685;GENE_008158;GENE_008526;GENE_008583;GENE_008623;GENE_008632;GENE_010461;GENE_010465;GENE_010499;GENE_010867;GENE_013007;GENE_015267;GENE_015288;GENE_015303;GENE_015333;GENE_016491;GENE_018570;GENE_022172;GENE_022482;GENE_022807;GENE_024255;GENE_025693;GENE_026325
29	GO:0009719	BP	response to endogenous stimulus	29/ 2880	132/ 22477	0.219697	0.00362076	0.0899614	GENE_001058;GENE_001148;GENE_001481;GENE_001586;GENE_001769;GENE_003180;GENE_003628;GENE_006652;GENE_008112;GENE_008896;GENE_009035;GENE_009450;GENE_012019;GENE_013147;GENE_013617;GENE_016375;GENE_020850;GENE_020967;GENE_021498;GENE_021500;GENE_021794;GENE_024065;GENE_024074;GENE_024206;GENE_024217;GENE_024340;GENE_024522;GENE_025556;GENE_025610
9	GO:0002831	BP	regulation of response to biotic stimulus	9/ 2880	26/ 22477	0.346154	0.00369607	0.0910126	GENE_000343;GENE_004518;GENE_009661;GENE_009674;GENE_010713;GENE_011075;GENE_016431;GENE_025354;GENE_026023
20	GO:0006865	BP	amino acid transport	20/ 2880	81/ 22477	0.246914	0.00382093	0.0931906	GENE_000133;GENE_000588;GENE_000816;GENE_000987;GENE_002548;GENE_003921;GENE_005534;GENE_006708;GENE_007271;GENE_008522;GENE_009157;GENE_012532;GENE_013334;GENE_015697;GENE_016949;GENE_019006;GENE_019244;GENE_020874;GENE_026210;GENE_026220
14	GO:0006040	BP	amino sugar metabolic process	14/ 2880	49/ 22477	0.285714	0.00383532	0.0931906	GENE_002993;GENE_013416;GENE_013432;GENE_013585;GENE_018800;GENE_018821;GENE_018829;GENE_018921;GENE_024257;GENE_025162;GENE_025165;GENE_025186;GENE_025204;GENE_025241
11	GO:0002229	BP	defense response to oomycetes	11/ 2880	36/ 22477	0.305556	0.00418417	0.0984085	GENE_006848;GENE_009995;GENE_018779;GENE_018819;GENE_018853;GENE_019584;GENE_020311;GENE_020314;GENE_023125;GENE_023277;GENE_023314
11	GO:0002239	BP	response to oomycetes	11/ 2880	36/ 22477	0.305556	0.00418417	0.0984085	GENE_006848;GENE_009995;GENE_018779;GENE_018819;GENE_018853;GENE_019584;GENE_020311;GENE_020314;GENE_023125;GENE_023277;GENE_023314
11	GO:0002376	BP	immune system process	11/ 2880	36/ 22477	0.305556	0.00418417	0.0984085	GENE_001586;GENE_001769;GENE_003213;GENE_005781;GENE_009661;GENE_009674;GENE_011260;GENE_011533;GENE_016082;GENE_017275;GENE_021104
9	GO:0019840	MF	isoprenoid binding	9/ 2880	27/ 22477	0.333333	0.00492273	0.100386	GENE_002666;GENE_002671;GENE_002678;GENE_002696;GENE_002744;GENE_002746;GENE_006169;GENE_007987;GENE_012358
5	GO:0016841	MF	ammonia-lyase activity	5/ 2880	10/ 22477	0.5	0.00495837	0.100386	GENE_002273;GENE_002330;GENE_015663;GENE_016727;GENE_025865
97	GO:0044255	BP	cellular lipid metabolic process	97/ 2880	576/ 22477	0.168403	0.00443515	0.103647	GENE_000141;GENE_000780;GENE_000868;GENE_001156;GENE_001556;GENE_001790;GENE_002627;GENE_002658;GENE_002759;GENE_003953;GENE_004414;GENE_004993;GENE_005003;GENE_005088;GENE_005414;GENE_005480;GENE_005564;GENE_005636;GENE_005675;GENE_005802;GENE_005898;GENE_005916;GENE_006654;GENE_006746;GENE_006768;GENE_006960;GENE_007184;GENE_007389;GENE_007474;GENE_007864;GENE_007956;GENE_008312;GENE_008468;GEN…
20	GO:0008061	MF	chitin binding	20/ 2880	85/ 22477	0.235294	0.00546729	0.108492	GENE_001586;GENE_001769;GENE_002993;GENE_008790;GENE_012945;GENE_013416;GENE_013432;GENE_013434;GENE_013448;GENE_013457;GENE_018800;GENE_018821;GENE_018829;GENE_018921;GENE_024257;GENE_025162;GENE_025165;GENE_025186;GENE_025204;GENE_025241
15	GO:0042742	BP	defense response to bacterium	15/ 2880	57/ 22477	0.263158	0.00489346	0.111491	GENE_003180;GENE_003530;GENE_006848;GENE_008790;GENE_009995;GENE_018779;GENE_018819;GENE_018853;GENE_019584;GENE_020311;GENE_020314;GENE_023125;GENE_023277;GENE_023314;GENE_023368
9	GO:0032101	BP	regulation of response to external stimulus	9/ 2880	27/ 22477	0.333333	0.00492273	0.111491	GENE_000343;GENE_004518;GENE_009661;GENE_009674;GENE_010713;GENE_011075;GENE_016431;GENE_025354;GENE_026023
32	GO:0016042	BP	lipid catabolic process	32/ 2880	154/ 22477	0.207792	0.00508976	0.114171	GENE_000415;GENE_002067;GENE_002159;GENE_002410;GENE_002759;GENE_004414;GENE_004993;GENE_005003;GENE_008312;GENE_008947;GENE_008968;GENE_009878;GENE_009899;GENE_009959;GENE_010121;GENE_011773;GENE_012237;GENE_012928;GENE_012933;GENE_013222;GENE_013474;GENE_013503;GENE_015875;GENE_015881;GENE_019651;GENE_019897;GENE_020323;GENE_021270;GENE_022201;GENE_022508;GENE_023526;GENE_024577
8	GO:0016645	MF	oxidoreductase activity, acting on the CH-NH group of donors	8/ 2880	23/ 22477	0.347826	0.00592017	0.114986	GENE_004105;GENE_006862;GENE_017863;GENE_020439;GENE_022698;GENE_025520;GENE_025639;GENE_025829
47	GO:0010033	BP	response to organic substance	47/ 2880	247/ 22477	0.190283	0.00526785	0.116432	GENE_001058;GENE_001148;GENE_001481;GENE_001586;GENE_001712;GENE_001769;GENE_003180;GENE_003628;GENE_004124;GENE_004612;GENE_006652;GENE_008112;GENE_008664;GENE_008896;GENE_009035;GENE_009450;GENE_009661;GENE_009674;GENE_012019;GENE_012582;GENE_012987;GENE_013075;GENE_013147;GENE_013617;GENE_014567;GENE_016375;GENE_017403;GENE_018738;GENE_019858;GENE_020850;GENE_020967;GENE_021498;GENE_021500;GEN…
20	GO:0044550	BP	secondary metabolite biosynthetic process	20/ 2880	85/ 22477	0.235294	0.00546729	0.118483	GENE_000900;GENE_002273;GENE_002330;GENE_003180;GENE_005890;GENE_006524;GENE_006544;GENE_007735;GENE_010917;GENE_011816;GENE_012066;GENE_012893;GENE_013085;GENE_016220;GENE_016727;GENE_017909;GENE_019969;GENE_020077;GENE_020274;GENE_025865
65	GO:0046394	BP	carboxylic acid biosynthetic process	65/ 2880	364/ 22477	0.178571	0.00548979	0.118483	GENE_000485;GENE_000868;GENE_001253;GENE_002273;GENE_002330;GENE_002627;GENE_002658;GENE_005088;GENE_005177;GENE_005400;GENE_005414;GENE_005480;GENE_005531;GENE_005552;GENE_005675;GENE_005898;GENE_005916;GENE_006338;GENE_006768;GENE_006923;GENE_007101;GENE_007184;GENE_007474;GENE_007533;GENE_007685;GENE_007689;GENE_007864;GENE_008468;GENE_009378;GENE_010188;GENE_011083;GENE_011473;GENE_012120;GEN…
65	GO:0016053	BP	organic acid biosynthetic process	65/ 2880	364/ 22477	0.178571	0.00548979	0.118483	GENE_000485;GENE_000868;GENE_001253;GENE_002273;GENE_002330;GENE_002627;GENE_002658;GENE_005088;GENE_005177;GENE_005400;GENE_005414;GENE_005480;GENE_005531;GENE_005552;GENE_005675;GENE_005898;GENE_005916;GENE_006338;GENE_006768;GENE_006923;GENE_007101;GENE_007184;GENE_007474;GENE_007533;GENE_007685;GENE_007689;GENE_007864;GENE_008468;GENE_009378;GENE_010188;GENE_011083;GENE_011473;GENE_012120;GEN…
16	GO:0016769	MF	transferase activity, transferring nitrogenous groups	16/ 2880	62/ 22477	0.258065	0.00623153	0.119097	GENE_003406;GENE_003416;GENE_003486;GENE_003942;GENE_006525;GENE_007811;GENE_008726;GENE_012286;GENE_012423;GENE_014530;GENE_015698;GENE_016840;GENE_019622;GENE_020593;GENE_022873;GENE_025184
16	GO:0008483	MF	transaminase activity	16/ 2880	62/ 22477	0.258065	0.00623153	0.119097	GENE_003406;GENE_003416;GENE_003486;GENE_003942;GENE_006525;GENE_007811;GENE_008726;GENE_012286;GENE_012423;GENE_014530;GENE_015698;GENE_016840;GENE_019622;GENE_020593;GENE_022873;GENE_025184
3	GO:0008661	MF	1-deoxy-D-xylulose-5-phosphate synthase activity	3/ 2880	4/ 22477	0.75	0.00759961	0.136507	GENE_001556;GENE_006654;GENE_022228
3	GO:0015174	MF	basic amino acid transmembrane transporter activity	3/ 2880	4/ 22477	0.75	0.00759961	0.136507	GENE_000133;GENE_006708;GENE_015697
3	GO:0080031	MF	methyl salicylate esterase activity	3/ 2880	4/ 22477	0.75	0.00759961	0.136507	GENE_007956;GENE_018910;GENE_024929
3	GO:0004357	MF	glutamate-cysteine ligase activity	3/ 2880	4/ 22477	0.75	0.00759961	0.136507	GENE_002991;GENE_003031;GENE_003180
3	GO:0004351	MF	glutamate decarboxylase activity	3/ 2880	4/ 22477	0.75	0.00759961	0.136507	GENE_003968;GENE_007397;GENE_025384
6	GO:0015250	MF	water channel activity	6/ 2880	15/ 22477	0.4	0.00784564	0.137996	GENE_001856;GENE_008664;GENE_014567;GENE_015355;GENE_018602;GENE_020546
6	GO:0005372	MF	water transmembrane transporter activity	6/ 2880	15/ 22477	0.4	0.00784564	0.137996	GENE_001856;GENE_008664;GENE_014567;GENE_015355;GENE_018602;GENE_020546
11	GO:0042886	BP	amide transport	11/ 2880	38/ 22477	0.289474	0.00658253	0.138007	GENE_002061;GENE_006637;GENE_008188;GENE_010055;GENE_016325;GENE_024594;GENE_024904;GENE_025064;GENE_025382;GENE_025430;GENE_025930
5	GO:0140303	MF	intramembrane lipid transporter activity	5/ 2880	11/ 22477	0.454545	0.00813832	0.139874	GENE_000101;GENE_002958;GENE_002968;GENE_003658;GENE_020531
5	GO:0034595	MF	phosphatidylinositol phosphate 5-phosphatase activity	5/ 2880	11/ 22477	0.454545	0.00813832	0.139874	GENE_015173;GENE_020665;GENE_020698;GENE_020864;GENE_020957
9	GO:0042562	MF	hormone binding	9/ 2880	29/ 22477	0.310345	0.0082991	0.141618	GENE_002666;GENE_002671;GENE_002678;GENE_002696;GENE_002744;GENE_002746;GENE_006169;GENE_007987;GENE_012358
27	GO:0009725	BP	response to hormone	27/ 2880	126/ 22477	0.214286	0.00689473	0.14292	GENE_001058;GENE_001148;GENE_001481;GENE_003180;GENE_003628;GENE_006652;GENE_008112;GENE_008896;GENE_009035;GENE_009450;GENE_012019;GENE_013147;GENE_013617;GENE_016375;GENE_020850;GENE_020967;GENE_021498;GENE_021500;GENE_021794;GENE_024065;GENE_024074;GENE_024206;GENE_024217;GENE_024340;GENE_024522;GENE_025556;GENE_025610
21	GO:0044272	BP	sulfur compound biosynthetic process	21/ 2880	92/ 22477	0.228261	0.00721136	0.146992	GENE_000338;GENE_000432;GENE_001556;GENE_002627;GENE_002862;GENE_003180;GENE_005400;GENE_005552;GENE_006654;GENE_007685;GENE_008537;GENE_011083;GENE_011473;GENE_013942;GENE_015371;GENE_018626;GENE_020439;GENE_020901;GENE_022228;GENE_022482;GENE_023446
16	GO:1901606	BP	alpha-amino acid catabolic process	16/ 2880	64/ 22477	0.25	0.0074447	0.148314	GENE_001735;GENE_002273;GENE_002330;GENE_003406;GENE_003968;GENE_004105;GENE_006338;GENE_007397;GENE_008006;GENE_015663;GENE_016727;GENE_018323;GENE_020593;GENE_025106;GENE_025384;GENE_025865
3	GO:0052863	BP	1-deoxy-D-xylulose 5-phosphate metabolic process	3/ 2880	4/ 22477	0.75	0.00759961	0.148314	GENE_001556;GENE_006654;GENE_022228
3	GO:0052865	BP	1-deoxy-D-xylulose 5-phosphate biosynthetic process	3/ 2880	4/ 22477	0.75	0.00759961	0.148314	GENE_001556;GENE_006654;GENE_022228
3	GO:0019184	BP	nonribosomal peptide biosynthetic process	3/ 2880	4/ 22477	0.75	0.00759961	0.148314	GENE_002991;GENE_003031;GENE_003180
3	GO:0009696	BP	salicylic acid metabolic process	3/ 2880	4/ 22477	0.75	0.00759961	0.148314	GENE_007956;GENE_018910;GENE_024929
3	GO:0006750	BP	glutathione biosynthetic process	3/ 2880	4/ 22477	0.75	0.00759961	0.148314	GENE_002991;GENE_003031;GENE_003180
53	GO:0032787	BP	monocarboxylic acid metabolic process	53/ 2880	291/ 22477	0.182131	0.00786907	0.151896	GENE_000432;GENE_000868;GENE_002273;GENE_002330;GENE_002627;GENE_002658;GENE_004603;GENE_004918;GENE_005003;GENE_005088;GENE_005414;GENE_005480;GENE_005509;GENE_005675;GENE_005898;GENE_005916;GENE_007184;GENE_007533;GENE_007689;GENE_007864;GENE_007956;GENE_008312;GENE_008468;GENE_010188;GENE_011773;GENE_012237;GENE_012509;GENE_013222;GENE_015699;GENE_015881;GENE_016727;GENE_017769;GENE_017807;GEN…
5	GO:0006833	BP	water transport	5/ 2880	11/ 22477	0.454545	0.00813832	0.151896	GENE_001856;GENE_015355;GENE_018602;GENE_020546;GENE_021498
5	GO:0042044	BP	fluid transport	5/ 2880	11/ 22477	0.454545	0.00813832	0.151896	GENE_001856;GENE_015355;GENE_018602;GENE_020546;GENE_021498
5	GO:0010112	BP	regulation of systemic acquired resistance	5/ 2880	11/ 22477	0.454545	0.00813832	0.151896	GENE_000343;GENE_004518;GENE_010713;GENE_011075;GENE_025354
5	GO:0009065	BP	glutamine family amino acid catabolic process	5/ 2880	11/ 22477	0.454545	0.00813832	0.151896	GENE_001735;GENE_003968;GENE_004105;GENE_007397;GENE_025384
[truncated: 196 more rows]

## Sheet: Supplementary table S4 KEGG 
Supplementary table S4: KEGG pathways DEGs.
1. DA P.m 1DPI vs DA CK 1DPI
[truncated: 288 more rows]

## Sheet: Supplementary table S5 TF
Supplementary table S5: TFs in DGEs.
[truncated: 315 more rows]

[truncated: 1 more sheets: Supplementary table S6 DM]
